# Supplementary material for: Catalytic asymmetric [3 + 2] cycloaddition of pyrazolone-derived MBH carbonate: highly stereoselective construction of the bispiro-[pyrazolone-dihydropyrrole-oxindole] skeleton
Source: Royal Society of Chemistry journal article supplement (doi:10.1039/d2cc00618a), 2022-01-01
Supplement: d2cc00618a1.pdf [file d2cc00618a1.pdf]

# Catalytic Asymmetric [3 + 2] Cycloaddition of Pyrazolone-Derived MBH Carbonate: Highly Stereoselective Construction of Bispiro [Pyrazolone-Dihydropyrrole-Oxindole] Skeleton

Zhou Tian, Jing Jiang, Zhen-Hui Yan, Qing-Qing Luo, Gu Zhan, \* Wei Huang, Xiang Li \* and Bo Han \*

*State Key Laboratory of Southwestern Chinese Medicine Resources, Hospital of Chengdu University of Traditional Chinese Medicine, School of Pharmacy, Chengdu University of Traditional Chinese Medicine, Chengdu 611137, China. E-mail: [lixiang2@cdutcm.edu.cn](mailto:lixiang2@cdutcm.edu.cn); [zhangu@cdutcm.edu.cn](mailto:zhangu@cdutcm.edu.cn); [hanbo@cdutcm.edu.cn](mailto:hanbo@cdutcm.edu.cn)*

## Supporting Information

### Table of Contents

|                                                                                |     |
|--------------------------------------------------------------------------------|-----|
| 1. General information .....                                                   | 2   |
| 2. Synthesis of substrates 1.....                                              | 3   |
| 3. General procedure for the preparation of new chiral DMAP-type catalysts.... | 10  |
| 4. Optimization of the model reaction (Table S1) <sup>a</sup> .....            | 14  |
| 5. General procedure for the asymmetric [2+3] annulation reaction. ....        | 16  |
| 6. Gram-scale reaction and deprotection of product 3a.....                     | 30  |
| 7. Structural diversity construction of product 3a.....                        | 31  |
| 8. Single crystal X-ray diffraction analysis and crystal data .....            | 34  |
| 9. NMR spectra and HPLC chromatograms.....                                     | 36  |
| 9.1 NMR spectra of substrates and catalysts .....                              | 36  |
| 9.2 NMR spectra and HPLC chromatograms of 3.....                               | 58  |
| 9.3 NMR spectra and HPLC chromatograms of derivatives .....                    | 115 |
| 9.4 HPLC chromatograms of gram-scale reaction.....                             | 125 |

## 1. General information

High Performance Liquid Chromatography (HPLC) was analyzed by chiral column in comparison with authentic racemates, using a Daicel Chiralpak OD-H or IA Column (250 x 4.6 mm). UV detection was performed at 270 nm. Nuclear magnetic resonance (NMR) spectra were recorded in DMSO-*d*<sub>6</sub> and CDCl<sub>3</sub> on JEOL 600 or 700 NMR instrument. Proton chemical shifts are reported in parts per million ( $\delta$  scale). The <sup>1</sup>H NMR chemical shifts are reported in ppm with the internal TMS signal at 0.0 ppm as standard. The <sup>13</sup>C NMR chemical shifts were given by using DMSO-*d*<sub>6</sub> or CDCl<sub>3</sub> as the internal standard (DMSO-*d*<sub>6</sub>:  $\delta$  = 39.52 ppm, CDCl<sub>3</sub>:  $\delta$  = 77.05 ppm). <sup>19</sup>F NMR chemical shifts were given by using DMSO-*d*<sub>6</sub>. Data are reported as follows: chemical shift [multiplicity (s = singlet, d = doublet, t = triplet, q = quartet, m = multiplet, br s = broad singlet), coupling constant(s) (Hz), integration]. High-resolution mass spectra (HRMS) were obtained using Agilent P/N G1969-90010 or Waters/Acquity UPLC-Synapt G2HDMS. High-resolution mass spectra were reported for the molecular ion [M+Na]<sup>+</sup> or [M+H]<sup>+</sup>. X-ray diffraction experiment was carried out on an Agilent Gemini and the data obtained were deposited at the Cambridge Crystallographic Data Centre. UV detection was performed at 254 nm. Column chromatography was performed on silica gel (300-400 mesh) using an eluent of ethyl acetate and petroleum ether. TLC was performed on glass-backed silica plates; products were visualized using UV light. Optical rotation values were measured with instruments operating at  $\lambda$  = 589 nm, corresponding to the sodium D line at 25 °C. All reagents and solvents were obtained from commercial sources and used without further purification. MBH Carbonate of Pyrazolinone **1a**<sup>1</sup> and 3-((tert-butoxycarbonyl)imino)-2-oxoindoline-1-carboxylate **2a**<sup>2</sup> were prepared according to the literature procedures. Oil baths were used as the heat source. Melting points were recorded on BUCHI Melting Point M-565 instrument.

## 2. Synthesis of substrates 1.

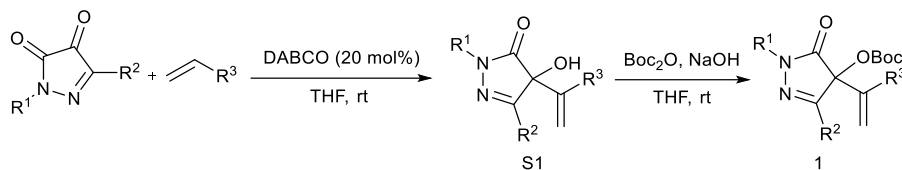

To a stirred solution of pyrazolodione (1.0 mmol) and corresponding acrylate (5.0 mmol) was added DABCO (23.0 mg, 0.21 mmol), and the mixture was stirred at room temperature. After completion, the mixture was concentrated under reduced pressure. The residue was purified by flash column chromatography (EtOAc/petroleum ether = 1/5) to give the product S1. Boc<sub>2</sub>O (0.46 mL, 2.0 mmol) was added to a stirred solution of S1 (1.0 mmol) and NaOH (80 mg, 2.0 mmol) in THF (5.0 mL) at 0 °C, and the mixture was stirred at room temperature. After completion (monitored by TLC), the reaction was quenched with water and extracted with EtOAc. The combined organic phases were dried over Na<sub>2</sub>SO<sub>4</sub>, and the solvent was removed in vacuo. The residue was purified by flash chromatography on silica gel (EtOAc/petroleum ether = 1/10) to give the product 1<sup>1</sup>.

### methyl 2-(4-((tert-butoxycarbonyl)oxy)-3-methyl-5-oxo-1-phenyl-4,5-dihydro-1H-pyrazol-4-yl)acrylate (1a).

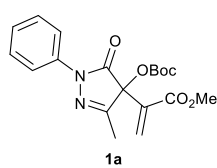

<sup>1</sup>H NMR (600 MHz, CDCl<sub>3</sub>) δ 7.89 (dt, *J* = 7.8, 1.2 Hz, 1H), 7.60 – 7.32 (m, 2H), 7.18 (tt, *J* = 7.2, 1.2 Hz, 2H), 6.69 (s, 1H), 6.51 (s, 1H), 3.68 (s, 3H), 2.04 (s, 3H), 1.44 (s, 9H). <sup>13</sup>C NMR (150 MHz, CDCl<sub>3</sub>) δ 168.1, 163.4, 153.7, 149.7, 138.1, 133.1, 131.4, 128.9, 125.2, 119.0, 84.9, 81.7, 52.6, 27.6, 13.0. HRMS (ESI-TOF) *m/z*: [M+Na]<sup>+</sup> Calcd for C<sub>19</sub>H<sub>22</sub>N<sub>2</sub>O<sub>6</sub> 397.1370; Found 397.1369.

**methyl 2-(4-((tert-butoxycarbonyl)oxy)-3-methyl-5-oxo-1-(o-tolyl)-4,5-dihydro-1H-pyrazol-4-yl)acrylate (1b).**

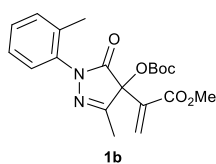

$^1\text{H}$  NMR (600 MHz,  $\text{CDCl}_3$ )  $\delta$  7.49 – 7.40 (m, 1H), 7.32 – 7.17 (m, 3H), 6.68 (s, 1H), 6.52 (s, 1H), 3.77 (s, 3H), 2.39 (s, 3H), 2.02 (s, 3H), 1.49 (s, 9H).  $^{13}\text{C}$  NMR (150 MHz,  $\text{CDCl}_3$ )  $\delta$  168.7, 163.5, 153.5, 149.9, 136.1, 135.8, 133.1, 131.2, 131.1, 128.3, 126.4, 126.3, 84.6, 80.8, 52.5, 27.6, 18.1, 13.1. HRMS (ESI-TOF)  $m/z$ :  $[\text{M}+\text{Na}]^+$  Calcd for  $\text{C}_{20}\text{H}_{24}\text{N}_2\text{O}_6$  411.1527; Found 411.1526.

**methyl 2-(4-((tert-butoxycarbonyl)oxy)-1-(2-chlorophenyl)-3-methyl-5-oxo-4,5-dihydro-1H-pyrazol-4-yl)acrylate (1c).**

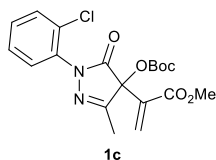

$^1\text{H}$  NMR (600 MHz,  $\text{CDCl}_3$ )  $\delta$  7.58 (dd,  $J = 8.4, 1.8$  Hz, 1H), 7.48 (dd,  $J = 8.4, 1.8$  Hz, 1H), 7.34 (td,  $J = 7.8, 1.8$  Hz, 1H), 7.29 (td,  $J = 7.8, 1.8$  Hz, 1H), 6.68 (s, 1H), 6.49 (s, 1H), 3.78 (s, 3H), 2.05 (s, 3H), 1.48 (s, 9H).  $^{13}\text{C}$  NMR (150 MHz,  $\text{CDCl}_3$ )  $\delta$  168.9, 163.6, 154.6, 150.1, 135.0, 132.9, 131.54, 131.51, 130.5, 129.4, 128.2, 127.5, 84.7, 80.8, 52.6, 27.6, 13.4. HRMS (ESI-TOF)  $m/z$ :  $[\text{M}+\text{Na}]^+$  Calcd for  $\text{C}_{19}\text{H}_{21}\text{ClN}_2\text{O}_6$  431.0980; Found 431.0980.

**methyl 2-(4-((tert-butoxycarbonyl)oxy)-3-methyl-5-oxo-1-(m-tolyl)-4,5-dihydro-1H-pyrazol-4-yl)acrylate (1d).**

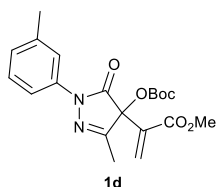

$^1\text{H}$  NMR (700 MHz,  $\text{CDCl}_3$ )  $\delta$  7.74 – 7.64 (m, 2H), 7.28 (t,  $J = 7.7$  Hz, 1H),  $\delta$  7.01 – 6.99 (m, 1H), 6.68 (s, 1H), 6.51 (s, 1H), 3.68 (s, 3H), 2.38 (s, 3H), 2.04 (s, 3H), 1.45 (s, 9H).  $^{13}\text{C}$  NMR (175 MHz,  $\text{CDCl}_3$ )  $\delta$  168.0, 163.4, 153.6, 149.6, 138.7, 137.9, 133.1, 131.3, 128.7, 126.0, 119.4, 116.1, 84.8, 81.7, 52.5, 27.6, 21.6, 12.9. HRMS (ESI-TOF)  $m/z$ :  $[\text{M}+\text{Na}]^+$  Calcd for  $\text{C}_{20}\text{H}_{24}\text{N}_2\text{O}_6$  411.1527; Found 411.1531.

**methyl 2-(4-((tert-butoxycarbonyl)oxy)-1-(3-chlorophenyl)-3-methyl-5-oxo-4,5-dihydro-1H-pyrazol-4-yl)acrylate (1e).**

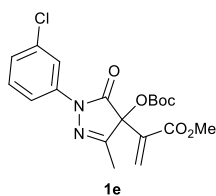

$^1\text{H}$  NMR (600 MHz,  $\text{CDCl}_3$ )  $\delta$  7.96 (t,  $J = 1.8$  Hz, 1H), 7.85 (ddd,  $J = 8.4, 2.4, 1.2$  Hz, 1H), 7.32 (t,  $J = 8.4$  Hz, 1H), 7.17 – 7.13 (m, 1H), 6.70 (s, 1H), 6.53 (s, 1H), 3.69 (s, 3H), 2.03 (s, 3H), 1.45 (s, 9H).

$^{13}\text{C}$  NMR (150 MHz,  $\text{CDCl}_3$ )  $\delta$  168.2, 163.4, 154.1, 149.7, 139.1,

134.7, 132.9, 131.6, 130.0, 125.0, 118.7, 116.5, 85.1, 81.6, 52.6, 27.6, 12.9. HRMS (ESI-TOF)  $m/z$ :  $[\text{M}+\text{Na}]^+$  Calcd for  $\text{C}_{19}\text{H}_{21}\text{ClN}_2\text{O}_6$  431.0980; Found 431.0979.

**methyl 2-(4-((tert-butoxycarbonyl)oxy)-1-(3-fluorophenyl)-3-methyl-5-oxo-4,5-dihydro-1H-pyrazol-4-yl)acrylate (1f).**

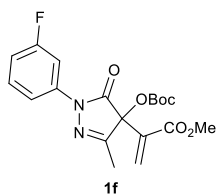

$^1\text{H}$  NMR (600 MHz,  $\text{CDCl}_3$ )  $\delta$  7.73 (ddd,  $J = 8.4, 2.4, 1.2$  Hz, 1H), 7.69 (dt,  $J = 10.8, 1.8$  Hz, 1H), 7.36 – 7.32 (m, 1H), 6.89 – 6.85 (m, 1H), 6.70 (s, 1H), 6.53 (s, 1H), 3.68 (s, 3H), 2.03 (s, 3H), 1.44 (s, 9H).

$^{13}\text{C}$  NMR (150 MHz,  $\text{CDCl}_3$ )  $\delta$  168.2, 163.4, 162.2 (d,  $J_{\text{CF}} =$

242.8 Hz), 153.9, 149.7, 139.5 (d,  $J_{\text{CF}} = 11.1$  Hz), 132.9, 131.5, 130.2 (d,  $J_{\text{CF}} = 9.2$  Hz), 113.9 (d,  $J_{\text{CF}} = 3.0$  Hz), 111.8 (d,  $J_{\text{CF}} = 21.0$  Hz), 106.2 (d,  $J_{\text{CF}} = 27.0$  Hz), 85.1, 81.7, 52.6, 27.6, 12.9. HRMS (ESI-TOF)  $m/z$ :  $[\text{M}+\text{Na}]^+$  Calcd for  $\text{C}_{19}\text{H}_{21}\text{FN}_2\text{O}_6$  415.1276; Found 415.1276.

**methyl 2-(4-((tert-butoxycarbonyl)oxy)-3-methyl-5-oxo-1-(p-tolyl)-4,5-dihydro-1H-pyrazol-4-yl)acrylate (1g).**

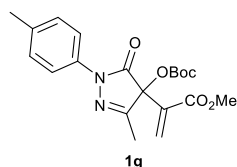

$^1\text{H}$  NMR (600 MHz,  $\text{CDCl}_3$ )  $\delta$  7.81 – 7.61 (m, 2H), 7.23 – 7.14 (m, 2H), 6.68 (s, 1H), 6.50 (s, 1H), 3.68 (s, 3H), 2.34 (s, 3H), 2.03 (s, 3H), 1.44 (s, 9H).

$^{13}\text{C}$  NMR (150 MHz,  $\text{CDCl}_3$ )  $\delta$  167.9, 163.5, 153.6, 149.7, 135.7, 134.9, 133.2, 131.3, 129.5, 119.1, 84.8, 81.7, 52.6, 27.6, 21.1, 13.0. HRMS (ESI-TOF)  $m/z$ :  $[\text{M}+\text{Na}]^+$  Calcd for  $\text{C}_{20}\text{H}_{24}\text{N}_2\text{O}_6$  411.1527; Found 411.1526.

**methyl 2-(4-((tert-butoxycarbonyl)oxy)-1-(4-methoxyphenyl)-3-methyl-5-oxo-4,5-dihydro-1H-pyrazol-4-yl)acrylate (1h).**

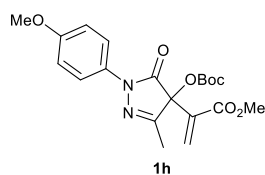

$^1\text{H}$  NMR (600 MHz,  $\text{CDCl}_3$ )  $\delta$  7.79 – 7.70 (m, 2H), 6.93 (dd,  $J$  = 9.0, 3.0 Hz, 2H), 6.67 (s, 1H), 6.50 (s, 1H), 3.81 (s, 3H), 3.69 (s, 3H), 2.02 (s, 3H), 1.45 (s, 9H).  $^{13}\text{C}$  NMR (150 MHz,  $\text{CDCl}_3$ )  $\delta$  167.9, 163.5, 157.3, 153.6, 149.7, 133.1, 131.5, 131.3, 121.2, 114.2, 84.8, 81.6, 55.6, 52.6, 27.6, 13.0. HRMS (ESI-TOF)  $m/z$ :  $[\text{M}+\text{Na}]^+$  Calcd for  $\text{C}_{20}\text{H}_{24}\text{N}_2\text{O}_7$  427.1476; Found 427.1475.

**methyl 2-(4-((tert-butoxycarbonyl)oxy)-1-(4-chlorophenyl)-3-methyl-5-oxo-4,5-dihydro-1H-pyrazol-4-yl)acrylate (1i).**

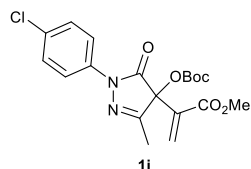

$^1\text{H}$  NMR (600 MHz,  $\text{CDCl}_3$ )  $\delta$  7.86 (d,  $J$  = 9.0 Hz, 2H), 7.36 (d,  $J$  = 9.0 Hz, 2H), 6.69 (s, 1H), 6.52 (s, 1H), 3.68 (s, 3H), 2.03 (s, 3H), 1.44 (s, 9H).  $^{13}\text{C}$  NMR (150 MHz,  $\text{CDCl}_3$ )  $\delta$  168.1, 163.4, 154.0, 149.7, 136.7, 132.9, 131.5, 130.2, 128.9, 120.0, 85.1, 81.6, 52.6, 27.6, 12.9. HRMS (ESI-TOF)  $m/z$ :  $[\text{M}+\text{Na}]^+$  Calcd for  $\text{C}_{19}\text{H}_{21}\text{ClN}_2\text{O}_6$  431.0980; Found 431.0984.

**methyl 2-(4-((tert-butoxycarbonyl)oxy)-3-methyl-5-oxo-1-(4-(trifluoromethyl)phenyl)-4,5-dihydro-1H-pyrazol-4-yl)acrylate (1j).**

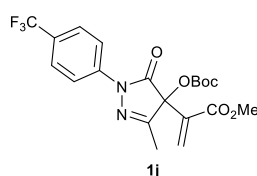

$^1\text{H}$  NMR (600 MHz,  $\text{CDCl}_3$ )  $\delta$  8.11 – 8.02 (m, 2H), 7.66 – 7.64 (m, 2H), 6.71 (s, 1H), 6.55 (s, 1H), 3.68 (s, 3H), 2.05 (s, 3H), 1.44 (s, 9H).  $^{13}\text{C}$  NMR (150 MHz,  $\text{CDCl}_3$ )  $\delta$  168.5, 163.4, 154.2, 149.7, 140.8, 132.9, 131.6, 126.7 (d,  $J_{\text{CF}}$  = 32.1 Hz), 126.2 (d,  $J_{\text{CF}}$  = 4.1 Hz), 125.2 (d,  $J_{\text{CF}}$  = 270.0 Hz), 118.1, 85.2, 81.6, 52.6, 27.6, 12.9. HRMS (ESI-TOF)  $m/z$ :  $[\text{M}+\text{Na}]^+$  Calcd for  $\text{C}_{20}\text{H}_{21}\text{F}_3\text{N}_2\text{O}_6$  465.1244; Found 465.1249.

**methyl 2-(4-((tert-butoxycarbonyl)oxy)-1-(2,4-dichlorophenyl)-3-methyl-5-oxo-4,5-dihydro-1H-pyrazol-4-yl)acrylate (1k).**

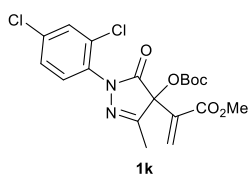

$^1\text{H}$  NMR (700 MHz,  $\text{CDCl}_3$ )  $\delta$  7.52 (d,  $J = 8.4$  Hz, 1H), 7.50 (d,  $J = 2.1$  Hz, 1H), 7.32 (dd,  $J = 8.4, 2.1$  Hz, 1H), 6.69 (s, 1H), 6.50 (s, 1H), 3.78 (s, 3H), 2.04 (s, 3H), 1.48 (s, 9H).  $^{13}\text{C}$  NMR (175 MHz,  $\text{CDCl}_3$ )  $\delta$  168.9, 163.4, 154.6, 150.0, 134.4, 133.7, 132.7, 132.3, 131.5, 130.2, 128.9, 127.7, 84.8, 80.5, 52.5, 27.6, 13.21, 13.20. HRMS (ESI-TOF)  $m/z$ :  $[\text{M}+\text{Na}]^+$  Calcd for  $\text{C}_{19}\text{H}_{20}\text{Cl}_2\text{N}_2\text{O}_6$  465.0591; Found 465.0599.

**methyl 2-(4-((tert-butoxycarbonyl)oxy)-1-(3,4-dichlorophenyl)-3-methyl-5-oxo-4,5-dihydro-1H-pyrazol-4-yl)acrylate (1l).**

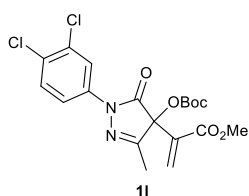

$^1\text{H}$  NMR (600 MHz,  $\text{CDCl}_3$ )  $\delta$  8.09 – 8.03 (m, 1H), 7.85 – 7.83 (m, 1H), 7.52 – 7.34 (m, 1H), 6.70 (s, 1H), 6.54 (s, 1H), 3.69 (s, 3H), 2.03 (s, 3H), 1.45 (s, 9H).  $^{13}\text{C}$  NMR (150 MHz,  $\text{CDCl}_3$ )  $\delta$  168.2, 163.4, 154.3, 149.7, 137.4, 132.9, 132.8, 131.7, 130.5, 128.2, 120.1, 117.6, 85.2, 81.5, 52.7, 27.6, 12.9. HRMS (ESI-TOF)  $m/z$ :  $[\text{M}+\text{Na}]^+$  Calcd for  $\text{C}_{19}\text{H}_{20}\text{Cl}_2\text{N}_2\text{O}_6$  465.0591; Found 465.0585.

**methyl 2-(4-((tert-butoxycarbonyl)oxy)-1,3-dimethyl-5-oxo-4,5-dihydro-1H-pyrazol-4-yl)acrylate (1m).**

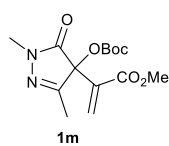

$^1\text{H}$  NMR (700 MHz,  $\text{CDCl}_3$ )  $\delta$  6.62 (s, 1H), 6.44 (s, 1H), 3.73 (s, 3H), 3.37 (s, 3H), 1.93 (s, 3H), 1.46 (s, 9H).  $^{13}\text{C}$  NMR (175 MHz,  $\text{CDCl}_3$ )  $\delta$  169.8, 163.4, 153.1, 149.6, 132.9, 131.0, 84.5, 80.6, 52.4, 31.9, 27.6, 12.9. HRMS (ESI-TOF)  $m/z$ :  $[\text{M}+\text{Na}]^+$  Calcd for  $\text{C}_{14}\text{H}_{20}\text{N}_2\text{O}_6$  335.1214; Found 335.1211.

**ethyl 2-(4-((tert-butoxycarbonyl)oxy)-3-methyl-5-oxo-1-phenyl-4,5-dihydro-1H-pyrazol-4-yl)acrylate (1n).**

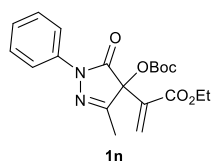

$^1\text{H NMR}$  (700 MHz,  $\text{CDCl}_3$ )  $\delta$  7.94 – 7.84 (m, 2H), 7.43 – 7.36 (m, 2H), 7.17 (tt,  $J = 7.7, 1.4$  Hz, 1H), 6.69 (s, 1H), 6.49 (s, 1H), 4.12 (qd,  $J = 7.0, 2.1$  Hz, 2H), 2.04 (s, 3H), 1.44 (s, 9H), 1.14 (t,  $J = 7.7$  Hz, 3H).  $^{13}\text{C NMR}$  (175 MHz,  $\text{CDCl}_3$ )  $\delta$  168.1, 162.9, 153.7, 149.6, 138.1, 133.3, 131.1, 128.9, 125.0, 118.7, 84.8, 81.7, 61.7, 27.5, 13.9, 12.9. HRMS (ESI-TOF)  $m/z$ :  $[\text{M}+\text{Na}]^+$  Calcd for  $\text{C}_{20}\text{H}_{24}\text{N}_2\text{O}_6$  411.1527; Found 411.1527.

**tert-butyl 2-(4-((tert-butoxycarbonyl)oxy)-3-methyl-5-oxo-1-phenyl-4,5-dihydro-1H-pyrazol-4-yl)acrylate (1o).**

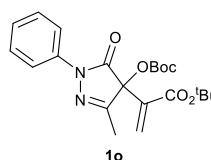

$^1\text{H NMR}$  (600 MHz,  $\text{CDCl}_3$ )  $\delta$  7.93 – 7.89 (m, 2H), 7.41 – 7.38 (m, 2H), 7.17 (t,  $J = 7.8$  Hz, 1H), 6.58 (s, 1H), 6.38 (s, 1H), 2.05 (s, 3H), 1.43 (s, 9H), 1.35 (s, 9H).  $^{13}\text{C NMR}$  (150 MHz,  $\text{CDCl}_3$ )  $\delta$  168.2, 162.4, 154.1, 149.8, 138.3, 134.6, 130.2, 128.9, 124.9, 118.7, 84.7, 83.1, 81.8, 27.9, 27.6, 13.1. HRMS (ESI-TOF)  $m/z$ :  $[\text{M}+\text{Na}]^+$  Calcd for  $\text{C}_{22}\text{H}_{28}\text{N}_2\text{O}_6$  439.1840; Found 439.1846.

**tert-butyl (4-(1-cyanovinyl)-5-oxo-1,3-diphenyl-4,5-dihydro-1H-pyrazol-4-yl) carbonate (1p).**

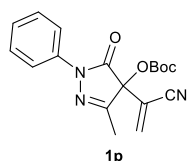

$^1\text{H NMR}$  (600 MHz,  $\text{CDCl}_3$ )  $\delta$  7.86 (d,  $J = 8.4$  Hz, 2H), 7.42 (t,  $J = 7.8$  Hz, 2H), 7.28 – 7.22 (m, 1H), 6.43 (s, 1H), 6.36 (s, 1H), 2.19 (s, 3H), 1.47 (s, 9H).  $^{13}\text{C NMR}$  (150 MHz,  $\text{CDCl}_3$ )  $\delta$  166.4, 154.7, 149.9, 137.5, 135.4, 129.1, 126.1, 119.4, 115.9, 114.0, 86.1, 81.6, 27.6, 13.3. HRMS(ESI-TOF)  $m/z$ :  $[\text{M}+\text{Na}]^+$  Calcd for  $\text{C}_{18}\text{H}_{19}\text{N}_3\text{O}_4$  364.1268, Found: 364.1270.

**tert-butyl 2-(4-((tert-butoxycarbonyl)oxy)-5-oxo-1,3-diphenyl-4,5-dihydro-1H-pyrazol-4-yl)acrylate (1dd).**



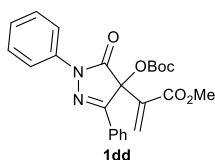

$^1\text{H}$  NMR (600 MHz,  $\text{CDCl}_3$ )  $\delta$  8.07 – 7.92 (m, 2H), 7.92 – 7.76 (m, 2H), 7.55 – 7.43 (m, 2H), 7.42 – 7.33 (m, 3H), 7.23 (tt,  $J = 7.2, 1.2$  Hz, 1H), 6.73 (s, 1H), 6.73 (s, 1H), 3.60 (s, 3H), 1.35 (s, 9H).  $^{13}\text{C}$  NMR (150 MHz,  $\text{CDCl}_3$ )  $\delta$  168.2, 163.5, 151.5, 149.6, 138.2, 134.6, 130.7, 130.6, 129.4, 128.9, 128.9, 126.4, 125.5, 119.3, 85.0, 81.2, 52.5, 27.6. HRMS (ESI-TOF)  $m/z$ :  $[\text{M}+\text{Na}]^+$  Calcd for  $\text{C}_{24}\text{H}_{24}\text{N}_2\text{O}_6$  459.1527; Found 459.1524.

methyl 2-(4-((tert-butoxycarbonyl)oxy)-3-isopropyl-5-oxo-1-phenyl-4,5-dihydro-1H-pyrazol-4-yl)acrylate (1 ee).

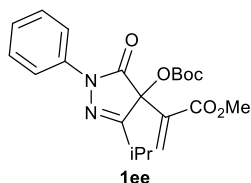

$^1\text{H}$  NMR (700 MHz,  $\text{CDCl}_3$ )  $\delta$  8.01 – 7.71 (m, 2H), 7.48 – 7.36 (m, 2H), 7.18 (tt,  $J = 7.7, 1.4$  Hz, 1H), 6.67 (s, 1H), 6.55 (s, 1H), 3.67 (s, 3H), 2.68 – 2.62 (m, 1H), 1.44 (s, 9H), 1.32 – 1.12 (m, 6H).  $^{13}\text{C}$  NMR (175 MHz,  $\text{CDCl}_3$ )  $\delta$  168.2, 163.5, 159.9, 149.6, 138.1, 133.7, 130.7, 128.8, 125.1, 119.0, 84.6, 81.9, 52.5, 28.6, 27.5, 20.1, 20.0. HRMS (ESI-TOF)  $m/z$ :  $[\text{M}+\text{Na}]^+$  Calcd for  $\text{C}_{21}\text{H}_{26}\text{N}_2\text{O}_6$  425.1683; Found 425.1682.

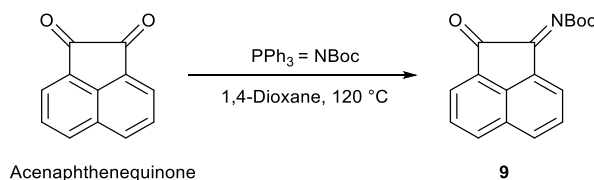

To a solution of Acenaphthenequinone (1.0 g, 5.49 mmol) in 20.0 mL 1,4-Dioxane was added  $\text{PPh}_3 = \text{NBoc}$  (2.49 g, 6.59 mmol). The mixture was stirred at 120 °C for 24 h. After completion, the solvent was removed under reduced pressure and the residue was purified by flash column chromatography on silica gel eluting with petroleum ether/ ethyl acetate (30:1) to afford the acenaphthenequinoneimine **9**.

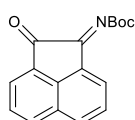

$^1\text{H}$  NMR (700 MHz,  $\text{CDCl}_3$ )  $\delta$  8.18 (d,  $J = 8.4$  Hz, 1H), 8.10 (d,  $J = 8.4$  Hz, 1H), 8.03 – 7.94 (m, 2H), 7.84 – 7.65 (m, 2H), 1.68 (s, 9H).  $^{13}\text{C}$  NMR (175 MHz,  $\text{CDCl}_3$ )  $\delta$  183.7, 161.1, 157.9, 144.3, 132.4, 130.5, 130.1, 129.4, 129.1, 128.7, 128.5, 122.4, 121.3, 83.4, 28.1. HRMS (ESI-TOF)  $m/z$ :  $[\text{M}+\text{Na}]^+$  Calcd for  $\text{C}_{17}\text{H}_{15}\text{NO}_3$  304.0950; Found 304.0945.

### 3. General procedure for the preparation of new chiral DMAP-type catalysts.

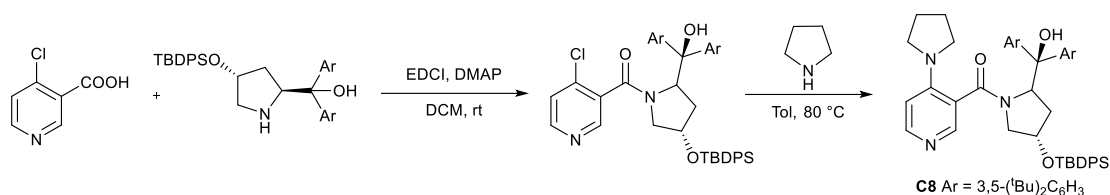

The newly developed catalyst **C8** was readily synthesized from chiral secondary amines and 4-chloronicotinic acid. To a solution of chiral secondary amines (1.69 g, 2.31 mmol) in 40.0 mL DCM was successively added 4-chloronicotinic acid (361.2 mg, 2.31 mmol), 1-Ethyl-3-(3-dimethylaminopropyl)carbodiimide hydrochloride (EDCI, 884.6 mg, 4.62 mmol) and 4-Dimethylaminopyridine (DMAP, 28.2 mg, 0.23 mmol). The mixture was stirred at rt for 8 h before being quenched with water (20 mL). The phases were separated and the aqueous phase was extracted with DCM (2 × 10 mL). The combined organic phases were washed with brine (20 mL) before being dried (Na<sub>2</sub>SO<sub>4</sub>) and concentrated in vacuum. Purification by flash column chromatography on silica gel yielded the amide. To a solution of the amide (1.8 g, 2.06 mmol) in toluene (40 mL) was added pyrrolidine (206.9 μL, 2.48 mmol). Then, the mixture was stirred at 80 °C for 12 h. After completion, the solvent was removed under reduced pressure and the residue was purified by flash column chromatography on silica gel eluting with petroleum ether/ ethyl acetate (1:1) to afford the catalyst **C8**. The corresponding chiral secondary amines were prepared according to the literature procedure<sup>3</sup>.

[1]. Z. H. Yang; P. Chen; Z. C. Chen; Z. Chen; W. Du; Y. C. Chen, *Angew. Chem. Int. Ed.*, 2021, **60** (25), 13913-13917.

[2]. M. Urban, M. Franc, a, M. Hofmanová, I. Císařová b and J. Veselý, *Org. Biomol. Chem.*, 2017, **15**, 9071-9076.

[3]. L. Caruana, F. Kniep, T. K. Johansen, P. H. Poulsen, K. A. Jørgensen, *J. Am. Chem. Soc.* 2014, **136**, 15929.

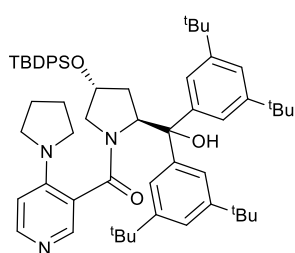

**C8** was obtained as a white solid. 1.72g, 90% yield;  $[\alpha]_D^{20} = +17.8$  ( $c = 0.06$  in MeOH).  $^1\text{H NMR}$  (600 MHz,  $\text{CDCl}_3$ )  $\delta$  8.01 (d,  $J = 6.6$  Hz, 1H), 7.77 (s, 1H), 7.49 – 7.42 (m, 2H), 7.38 (t,  $J = 1.8$  Hz, 1H), 7.37 – 7.24 (m, 8H), 7.22 – 7.14 (m, 6H), 6.42 (s, 1H), 6.34 (d,  $J = 6.0$  Hz, 1H), 5.41-5.38 (m, 1H), 4.09 (t,  $J = 3.6$  Hz, 1H), 3.49-3.36 (m, 3H), 3.20 – 3.13 (m, 2H), 3.03 (dd,  $J = 12.0, 3.0$  Hz, 1H), 2.16 (s, 1H), 2.09-2.01 (m, 1H), 1.95-1.87 (m, 1H), 1.83 – 1.74 (m, 2H), 1.32 – 1.25 (m, 1H), 1.19 (s, 18H), 1.17 (s, 18H), 0.94 (s, 9H).  $^{13}\text{C NMR}$  (150 MHz,  $\text{CDCl}_3$ )  $\delta$  170.4, 148.9, 148.8, 148.7, 147.8, 147.6, 142.4, 139.9, 134.5, 134.2, 132.3, 131.8, 129.1, 128.9, 126.9, 126.8, 121.6, 120.24, 120.20, 120.1, 114.9, 107.3, 81.4, 70.1, 68.9, 60.0, 48.2, 40.6, 33.9, 33.8, 30.6, 30.5, 25.9, 24.6, 18.1. HRMS (ESI-TOF)  $m/z$ :  $[\text{M}+\text{H}]^+$  Calcd for  $\text{C}_{59}\text{H}_{80}\text{N}_3\text{O}_3\text{Si}$  906.5963, Found 906.5961.

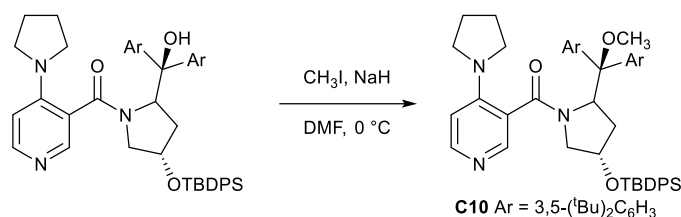

To a solution of **C8** (200.0 mg, 0.22 mmol) in DMF (2 mL) was added a solution of NaH (15.9 mg, 0.66 mmol) in DMF (1 mL) at 0 °C. After 5 min, the mixture was added Iodomethane (16.5  $\mu\text{L}$ , 0.26 mmol). The reaction was stirred at rt for 10 min before being quenched with water (1 mL). The mixture was extracted with EtOAc ( $2 \times 5$  mL). The combined organic phases were washed with brine (1 mL) and dried with  $\text{Na}_2\text{SO}_4$ . After concentrated in vacuum, the residue was purified by flash column chromatography on silica gel eluting with petroleum ether/ ethyl acetate (1:1) to afford **C10** as a white solid (180.0 mg, 89% yield).

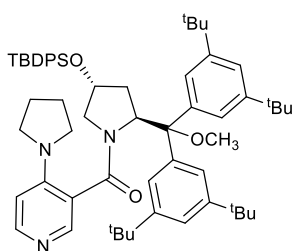

**C10** was obtained as a white solid. 180.0 mg, 89% yield;  $[\alpha]_D^{20} = +19.4$  ( $c = 0.06$  in MeOH).  $^1\text{H NMR}$  (700 MHz,  $\text{CDCl}_3$ )  $\delta$  8.17 (d,  $J = 6.3$  Hz, 1H), 7.73 (s, 1H), 7.49 – 7.48 (m, 2H), 7.37 – 7.34 (m, 3H), 7.34 – 7.27 (m, 6H), 7.25 – 7.18 (m, 2H), 7.13 (s, 1H), 7.09 (d,  $J = 2.1$  Hz, 2H), 7.01 – 7.95 (m, 1H), 6.46 (d,  $J = 6.3$  Hz, 1H), 6.01 (dd,  $J = 9.8, 3.5$  Hz, 1H), 3.93 (t,  $J = 7.7$  Hz, 1H), 3.53 – 3.48 (m, 2H), 3.33 – 3.31 (m, 1H), 3.28 – 3.25 (m, 2H), 2.96 (s, 3H), 2.39 – 2.29 (m, 2H), 1.91 – 1.84 (m, 2H), 1.71 – 1.65 (m, 2H), 1.25 (s, 18H), 1.19 (s, 18H), 0.94 (s, 9H).  $^{13}\text{C NMR}$  (175 MHz,  $\text{CDCl}_3$ )  $\delta$  169.8, 149.5, 149.4, 149.3, 140.4, 139.7, 135.7, 135.54, 135.46, 135.3, 133.5, 133.4, 129.8, 129.7, 127.70, 127.66, 124.0, 123.3, 121.2, 120.9, 117.1, 108.5, 87.2, 73.5, 60.2, 60.1, 52.2, 49.2, 41.4, 39.6, 34.84, 34.76, 31.5, 31.4, 26.9, 25.6. HRMS (ESI-TOF)  $m/z$ :  $[\text{M}+\text{H}]^+$  Calcd for  $\text{C}_{60}\text{H}_{81}\text{N}_3\text{O}_3\text{Si}$  920.6120, Found 920.6124.

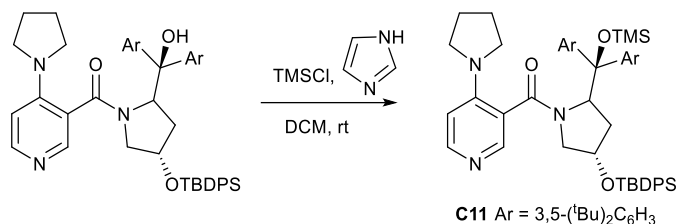

To a solution of **C8** (200.0 mg, 0.22 mmol) in DCM (2 mL) was added a solution of Imidazole (15.0 mg, 0.22 mmol) in DCM (1 mL) at room temperature, the mixture was added Chlorotrimethylsilane (33.6  $\mu\text{L}$ , 0.26 mmol). The reaction was stirred at rt for 10 h before being quenched with water (1 mL). The mixture was extracted with DCM (2  $\times$  5 mL). The combined organic phases were washed with brine (1 mL) and dried with  $\text{Na}_2\text{SO}_4$ . After concentrated in vacuum, the residue was purified by flash column chromatography on silica gel eluting with petroleum ether/ ethyl acetate (1:1) to afford **C11** as a white solid (195.0 mg, 90% yield).

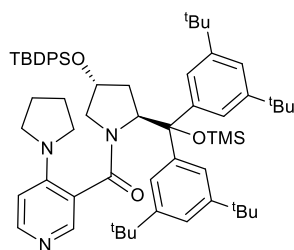

**C11** was obtained as a white solid. 195.0 mg, 90% yield;  $[\alpha]_D^{20} = +18.1$  ( $c = 0.06$  in MeOH).  $^1\text{H NMR}$  (700 MHz,  $\text{CDCl}_3$ )  $\delta$  8.10 (d,  $J = 6.3$  Hz, 1H), 7.61 – 7.54 (m, 2H), 7.46 – 7.42 (m, 2H), 7.42 – 7.37 (m, 1H), 7.39 – 7.34 (m, 1H), 7.36 – 7.31 (m, 3H), 7.29 – 7.28 (m, 2H), 7.27 – 7.25 (d, 2H), 7.17 (d,  $J = 1.4$  Hz, 1H), 7.04 (s, 2H), 6.82 (s, 1H), 6.37 (d,  $J = 5.6$  Hz, 1H), 5.86 (d,  $J = 8.4$  Hz, 1H), 4.47 – 4.45 (m, 1H), 3.51 – 3.48 (m, 2H), 3.36 – 3.29 (m, 2H), 3.26 – 3.22 (m, 1H), 3.04 – 3.01 (m, 1H), 2.66 – 2.58 (m, 1H), 2.17 – 2.13 (m, 1H), 1.96 – 1.92 (m, 2H), 1.85 – 1.76 (m, 2H), 1.27 (s, 18H), 1.20 (s, 18H), 0.98 (s, 9H), -0.41 (s, 9H).  $^{13}\text{C NMR}$  (175 MHz,  $\text{CDCl}_3$ )  $\delta$  167.5, 147.9, 147.7, 147.5, 147.2, 141.5, 141.2, 134.1, 133.9, 132.2, 131.8, 128.4, 128.2, 126.22, 126.21, 121.9, 120.9, 119.9, 119.4, 115.9, 106.7, 83.8, 73.2, 62.9, 57.4, 47.1, 38.7, 33.4, 33.3, 30.0, 29.9, 25.4, 24.1, 17.4, -0.0. HRMS (ESI-TOF)  $m/z$ :  $[\text{M}+\text{H}]^+$  Calcd for  $\text{C}_{62}\text{H}_{87}\text{N}_3\text{O}_3\text{Si}_2$  978.6359, Found 978.6324.

#### 4. Optimization of the model reaction (Table S1)<sup>a</sup>

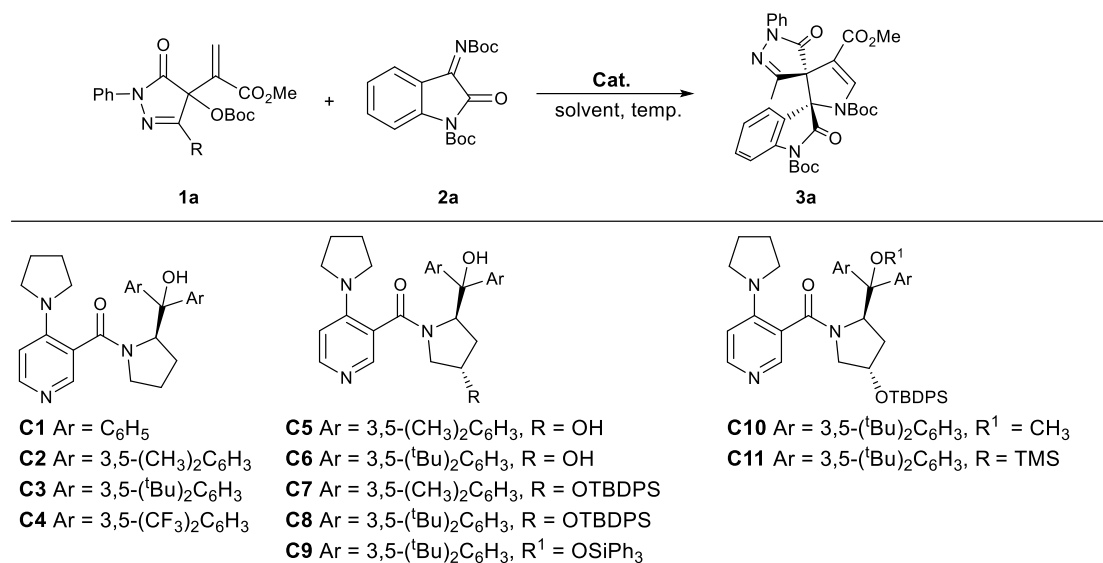

| Entry | R               | Cat.             | Solvent                         | T (°C) | t (h) | yield (%) <sup>b</sup> | ee (%) <sup>c</sup> | dr <sup>d</sup> |
|-------|-----------------|------------------|---------------------------------|--------|-------|------------------------|---------------------|-----------------|
| 1     | CH <sub>3</sub> | PPh <sub>3</sub> | CH <sub>2</sub> Cl <sub>2</sub> | rt     | 24    | n.r.                   | -                   | -               |
| 2     | CH <sub>3</sub> | DABCO            | CH <sub>2</sub> Cl <sub>2</sub> | rt     | 24    | n.r.                   | -                   | -               |
| 3     | CH <sub>3</sub> | DMAP             | CH <sub>2</sub> Cl <sub>2</sub> | rt     | 6     | 95                     | -                   | >20:1           |
| 4     | CH <sub>3</sub> | <b>C1</b>        | CH <sub>2</sub> Cl <sub>2</sub> | rt     | 24    | 41                     | 40                  | >20:1           |
| 5     | CH <sub>3</sub> | <b>C2</b>        | CH <sub>2</sub> Cl <sub>2</sub> | rt     | 6     | 91                     | 39                  | >20:1           |
| 6     | CH <sub>3</sub> | <b>C3</b>        | CH <sub>2</sub> Cl <sub>2</sub> | rt     | 6     | 93                     | 27                  | >20:1           |
| 7     | CH <sub>3</sub> | <b>C4</b>        | CH <sub>2</sub> Cl <sub>2</sub> | rt     | 6     | 69                     | 3                   | >20:1           |
| 8     | CH <sub>3</sub> | <b>C5</b>        | CH <sub>2</sub> Cl <sub>2</sub> | rt     | 24    | 73                     | 1                   | >20:1           |
| 9     | CH <sub>3</sub> | <b>C6</b>        | CH <sub>2</sub> Cl <sub>2</sub> | rt     | 24    | 40                     | 22                  | >20:1           |
| 10    | CH <sub>3</sub> | <b>C7</b>        | CH <sub>2</sub> Cl <sub>2</sub> | rt     | 48    | 43                     | 44                  | >20:1           |
| 11    | CH <sub>3</sub> | <b>C8</b>        | CH <sub>2</sub> Cl <sub>2</sub> | rt     | 6     | 87                     | 75                  | >20:1           |
| 12    | CH <sub>3</sub> | <b>C9</b>        | CH <sub>2</sub> Cl <sub>2</sub> | rt     | 6     | 92                     | 37                  | >20:1           |
| 13    | CH <sub>3</sub> | <b>C10</b>       | CH <sub>2</sub> Cl <sub>2</sub> | rt     | 48    | 40                     | 56                  | >20:1           |
| 14    | CH <sub>3</sub> | <b>C11</b>       | CH <sub>2</sub> Cl <sub>2</sub> | rt     | 48    | n.r.                   | n.r.                | >20:1           |
| 15    | CH <sub>3</sub> | <b>C8</b>        | Toluene                         | rt     | 4     | 98                     | 83                  | >20:1           |
| 16    | CH <sub>3</sub> | <b>C8</b>        | THF                             | rt     | 4     | 84                     | 90                  | >20:1           |

|                       |                 |           |                         |           |           |           |           |                 |
|-----------------------|-----------------|-----------|-------------------------|-----------|-----------|-----------|-----------|-----------------|
| 17                    | CH <sub>3</sub> | <b>C8</b> | MeCN                    | rt        | 4         | 83        | 43        | >20:1           |
| 18                    | CH <sub>3</sub> | <b>C8</b> | EA                      | rt        | 4         | 86        | 80        | >20:1           |
| 19                    | CH <sub>3</sub> | <b>C8</b> | DCE                     | rt        | 4         | 90        | 86        | >20:1           |
| 20                    | CH <sub>3</sub> | <b>C8</b> | CHCl <sub>3</sub>       | rt        | 4         | 92        | 90        | >20:1           |
| 21                    | CH <sub>3</sub> | <b>C8</b> | CHCl <sub>3</sub>       | 40        | 1         | 90        | 85        | >20:1           |
| 22                    | CH <sub>3</sub> | <b>C8</b> | CHCl <sub>3</sub>       | 0         | 24        | 86        | 91        | >20:1           |
| 23                    | CH <sub>3</sub> | <b>C8</b> | CHCl <sub>3</sub>       | -10       | 48        | 88        | 92        | >20:1           |
| 24                    | CH <sub>3</sub> | <b>C8</b> | CHCl <sub>3</sub>       | -20       | 120       | 85        | 93        | >20:1           |
| 25 <sup>e</sup>       | CH <sub>3</sub> | <b>C8</b> | CHCl <sub>3</sub>       | rt        | 48        | 27        | 90        | >20:1           |
| 26 <sup>f</sup>       | CH <sub>3</sub> | <b>C8</b> | CHCl <sub>3</sub>       | rt        | 48        | 20        | 90        | >20:1           |
| 27 <sup>g</sup>       | CH <sub>3</sub> | <b>C8</b> | CHCl <sub>3</sub>       | rt        | 36        | 63        | 90        | >20:1           |
| <b>28<sup>h</sup></b> | CH <sub>3</sub> | <b>C8</b> | <b>CHCl<sub>3</sub></b> | <b>rt</b> | <b>24</b> | <b>89</b> | <b>90</b> | <b>&gt;20:1</b> |
| 29 <sup>i</sup>       | CH <sub>3</sub> | <b>C8</b> | CHCl <sub>3</sub>       | rt        | 4         | 83        | 90        | >20:1           |
| 30                    | <i>i</i> -Pr    | <b>C8</b> | CHCl <sub>3</sub>       | rt        | 72        | 24        | 76        | >20:1           |
| 31                    | Ph              | <b>C8</b> | CHCl <sub>3</sub>       | rt        | 72        | 48        | 89        | >20:1           |

Reaction conditions: <sup>a</sup> **1a** (0.12 mmol), **2a** (0.10 mmol), **Cat.** (20 mol%) in 1.0 mL DCM at room temperature; <sup>b</sup> Isolated yield after column chromatography; <sup>c</sup> Enantiomeric excess of major diastereoisomer was determined by HPLC using chiral stationary phase; <sup>d</sup> Determined by <sup>1</sup>H NMR. <sup>e</sup> 10 mol% **C8** in 1.0 mL CHCl<sub>3</sub>; <sup>f</sup> 5 mol% **C8** in 1.0 mL CHCl<sub>3</sub>; <sup>g</sup> 5 mol% **C8** in 0.25 mL CHCl<sub>3</sub>; <sup>h</sup> 10 mol% **C8** in 0.5 mL CHCl<sub>3</sub>; <sup>i</sup> 15 mol% **C8** in 0.75 mL CHCl<sub>3</sub>.

## 5. General procedure for the asymmetric [2+3] annulation reaction.

MBH Carbonate of pyrazolinone **1a** (0.12 mmol), 3-((tert-butoxycarbonyl)imino)-2-oxindoline-1-carboxylate **2a** (0.10 mmol), and catalyst **C8** (9.1 mg, 0.01 mmol) were dissolved in CHCl<sub>3</sub> (0.5 mL), and the mixture was stirred at room temperature for 9-48 h. After completion of the reaction, the reaction mixture was concentrated and directly purified by flash column chromatography on silica gel (petroleum ether/ethyl acetate = 20/1 to 5/1) to afford the pure products **3a**.

### 1,1'-di-tert-butyl 4'-methyl (3*R*,3'*R*)-3''-methyl-2,5''-dioxo-1''-phenyl-1'',5''-dihydro-1''H-dispiro[indoline-3,2'-pyrrole-3',4''-pyrazole]-1,1',4'-tricarboxylate (**3a**).

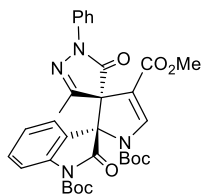

53.6 mg, 89% yield, white solid, mp 145.9 – 148.5 °C; HPLC (Daicel Chiralpak OD-H, n-hexane/2-propanol = 94:6, 1.0 mL/min, at 270 nm):  $t_R$  = 13.86 min (minor),  $t_R$  = 20.33 min (major); 90% *ee*,  $[\alpha]_D^{20}$  = -91.2 ( $c$  = 0.45, MeOH). <sup>1</sup>H NMR (600 MHz, DMSO-*d*<sub>6</sub>, 60 °C)  $\delta$  8.22 (s, 1H), 7.67 (d,  $J$  = 7.8 Hz, 1H), 7.47 (d,  $J$  = 7.8 Hz, 1H), 7.40 (t,  $J$  = 7.8 Hz, 1H), 7.35 (dd,  $J$  = 7.2, 1.8 Hz, 2H), 7.33 (dd,  $J$  = 8.4, 7.2 Hz, 2H), 7.20 (t,  $J$  = 7.8 Hz, 1H), 7.16 (td,  $J$  = 7.2, 1.8 Hz, 1H), 3.66 (s, 3H), 2.11 (s, 3H), 1.56 (s, 9H), 1.05 (s, 9H). <sup>13</sup>C NMR (150 MHz, DMSO-*d*<sub>6</sub>, 60 °C)  $\delta$  170.3, 169.2, 163.0, 156.5, 149.1, 148.2, 147.1, 139.2, 137.1, 131.4, 129.3, 126.1, 124.9, 119.4, 114.8, 107.9, 85.9, 84.8, 74.4, 52.4, 28.0, 27.5, 16.3. HRMS (ESI-TOF)  $m/z$ :  $[M+Na]^+$  Calcd for C<sub>32</sub>H<sub>34</sub>N<sub>4</sub>O<sub>8</sub> 625.2269; Found 625.2270.

### 1,1'-di-tert-butyl 4'-methyl (3*R*,3'*R*)-3''-methyl-2,5''-dioxo-1''-(*m*-tolyl)-1'',5''-dihydro-1''H-dispiro[indoline-3,2'-pyrrole-3',4''-pyrazole]-1,1',4'-tricarboxylate (**3b**).



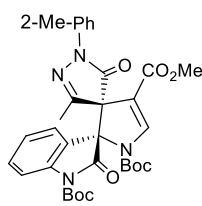

51.8 mg, 84% yield, white solid, mp 88.1 – 89.3 °C; HPLC (Daicel

Chiralpak OD-H, n-hexane/2-propanol = 94:6, 1.0 mL/min, at 270

nm):  $t_R = 13.86$  min (minor),  $t_R = 20.33$  min (major); 84% *ee*,  $[\alpha]_D^{20}$

= -204.4 ( $c = 0.45$ , MeOH).  $^1\text{H NMR}$  (600 MHz, DMSO- $d_6$ , 60 °C)

$\delta$  8.20 (s, 1H), 7.74 (d,  $J = 8.4$  Hz, 1H), 7.48 (t,  $J = 7.8$  Hz, 1H), 7.40 (d,  $J = 7.8$  Hz, 1H), 7.25 (dd,  $J = 7.8, 7.2$  Hz, 1H), 7.23 (d,  $J = 1.8$  Hz, 1H), 7.21 (d,  $J = 7.2$  Hz, 1H), 7.17 (td,  $J = 7.2, 1.8$  Hz, 1H), 6.68 (d,  $J = 7.8$  Hz, 1H), 3.71 (s, 3H), 2.08 (s, 3H), 1.75 (s, 3H), 1.58 (s, 9H), 1.04 (s, 9H).  $^{13}\text{C NMR}$  (150 MHz, DMSO- $d_6$ , 60 °C)  $\delta$  170.3, 169.9, 163.0, 156.4, 148.3, 146.6, 139.2, 135.7, 135.5, 131.4, 131.2, 129.2, 126.9, 126.8, 126.5, 124.9, 114.7, 108.2, 85.8, 84.7, 74.5, 52.4, 28.1, 27.5, 17.3, 16.3. HRMS (ESI-TOF)  $m/z$ :  $[\text{M}+\text{Na}]^+$  Calcd for  $\text{C}_{33}\text{H}_{36}\text{N}_4\text{O}_8$  639.2425; Found 639.2425.

**1'-di-tert-butyl 4'-methyl (3*R*,3'*R*)-1''-(2-chlorophenyl)-3''-methyl-2,5''-dioxo-1'',5''-dihydro-1'H-dispiro[indoline-3,2'-pyrrole-3',4''-pyrazole]-1,1',4'-tricarboxylate (3c).**

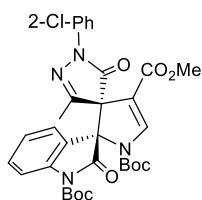

60.5 mg, 95% yield, white solid, mp 117.0 – 120.7 °C; HPLC (Daicel

Chiralpak OD-H, n-hexane/2-propanol = 94:6, 1.0 mL/min, at 270

nm):  $t_R = 13.86$  min (minor),  $t_R = 20.33$  min (major); 78% *ee*,  $[\alpha]_D^{20}$

= -128.9 ( $c = 0.45$ , MeOH).  $^1\text{H NMR}$  (600 MHz, DMSO- $d_6$ , 60 °C)  $\delta$

8.21 (s, 1H), 7.73 (d,  $J = 7.8$  Hz, 1H), 7.49 (dd,  $J = 7.8, 1.8$  Hz, 1H), 7.46 (t,  $J = 7.8$  Hz, 1H), 7.40 (dd,  $J = 7.8, 1.8$  Hz, 1H), 7.38 (d,  $J = 2.4$  Hz, 1H), 7.36 (dd,  $J = 7.8, 1.8$  Hz, 1H), 7.18 (t,  $J = 7.8$  Hz, 1H), 7.00 (s, 1H), 3.71 (s, 3H), 2.11 (s, 3H), 1.58 (s, 9H), 1.06 (s, 9H).  $^{13}\text{C NMR}$  (150 MHz, DMSO- $d_6$ , 60 °C)  $\delta$  170.0, 169.6, 162.9, 157.3, 149.0, 148.3, 146.5, 139.2, 134.4, 131.5, 131.4, 130.9, 130.5, 128.9, 128.4, 126.4, 124.9, 122.9, 114.8, 108.0, 85.6, 84.9, 74.9, 67.8, 52.4, 28.1, 27.5, 16.3. HRMS (ESI-TOF)  $m/z$ :  $[\text{M}+\text{Na}]^+$  Calcd for  $\text{C}_{32}\text{H}_{33}\text{ClN}_4\text{O}_8$  659.1879; Found 659.1878.

**1,1'-di-tert-butyl 4'-methyl (3*R*,3'*R*)-3''-methyl-2,5''-dioxo-1''-(*m*-tolyl)-1'',5''-dihydro-1'H-dispiro[indoline-3,2'-pyrrole-3',4''-pyrazole]-1,1',4'-tricarboxylate**

**(3d).**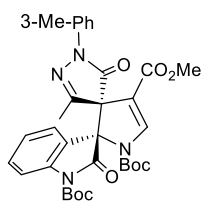

52.4 mg, 85% yield, white solid, mp 149.2 – 152.8 °C; HPLC (Daicel

Chiralpak OD-H, n-hexane/2-propanol = 94:6, 1.0 mL/min, at 270

nm):  $t_R = 13.86$  min (minor),  $t_R = 20.33$  min (major); 90% *ee*,  $[\alpha]_D^{20}$

= -302.4 ( $c = 0.45$ , MeOH).  $^1\text{H NMR}$  (600 MHz, DMSO- $d_6$ , 60 °C)  $\delta$

8.22 (s, 1H), 7.67 (d,  $J = 7.8$  Hz, 1H), 7.46 (d,  $J = 7.8$  Hz, 1H), 7.40 (t,  $J = 8.4$  Hz, 1H),

7.20 (td,  $J = 7.2, 1.8$  Hz, 2H), 7.16 (d,  $J = 7.8$  Hz, 2H), 6.98 (d,  $J = 7.8$  Hz, 1H), 3.67

(s, 3H), 2.26 (s, 3H), 2.11 (s, 3H), 1.57 (s, 9H), 1.06 (s, 9H).  $^{13}\text{C NMR}$  (150 MHz,

DMSO- $d_6$ , 60 °C)  $\delta$  170.3, 169.2, 162.9, 156.4, 149.1, 148.2, 147.0, 139.2, 138.8, 137.1,

131.4, 129.1, 126.8, 126.1, 124.9, 119.9, 116.7, 114.7, 107.9, 85.9, 84.9, 74.4, 70.0,

52.4, 28.1, 27.5, 21.4, 16.3. HRMS (ESI-TOF)  $m/z$ :  $[\text{M}+\text{Na}]^+$  Calcd for  $\text{C}_{33}\text{H}_{36}\text{N}_4\text{O}_8$

639.2425; Found 639.2426.

**1,1'-di-tert-butyl 4'-methyl (3*R*,3'*R*)-1''-(3-chlorophenyl)-3''-methyl-2,5''-dioxo-1'',5''-dihydro-1'H-dispiro[indoline-3,2'-pyrrole-3',4''-pyrazole]-1,1',4'-tricarboxylate (3e).**

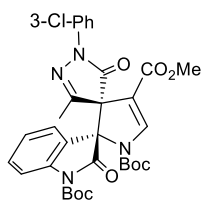

55.4 mg, 87% yield, white solid, mp 149.2 – 151.8 °C; HPLC (Daicel

Chiralpak OD-H, n-hexane/2-propanol = 94:6, 1.0 mL/min, at 270

nm):  $t_R = 13.86$  min (minor),  $t_R = 20.33$  min (major); 91% *ee*,  $[\alpha]_D^{20}$

= -291.1 ( $c = 0.45$ , MeOH).  $^1\text{H NMR}$  (600 MHz, DMSO- $d_6$ , 60 °C)  $\delta$

8.24 (s, 1H), 7.67 (d,  $J = 8.4$  Hz, 1H), 7.45 (d,  $J = 7.8$  Hz, 1H), 7.42 – 7.40 (m, 2H),

7.39 – 7.35 (m, 2H), 7.22 (dt,  $J = 7.2, 1.8$  Hz, 1H), 7.20 (t,  $J = 7.8$  Hz, 1H), 3.67 (s, 3H),

2.13 (s, 3H), 1.56 (s, 9H), 1.06 (s, 9H).  $^{13}\text{C NMR}$  (150 MHz, DMSO- $d_6$ , 60 °C)  $\delta$  170.3,

169.3, 162.9, 157.5, 148.9, 148.1, 147.2, 139.2, 138.3, 133.9, 131.5, 131.3, 126.0, 125.8,

124.9, 122.1, 118.4, 117.4, 114.8, 107.6, 85.9, 84.7, 74.6, 52.4, 28.0, 27.6, 16.3. HRMS

(ESI-TOF)  $m/z$ :  $[\text{M}+\text{Na}]^+$  Calcd for  $\text{C}_{32}\text{H}_{33}\text{ClN}_4\text{O}_8$  659.1879; Found 659.1879.

**1,1'-di-tert-butyl 4'-methyl (3*R*,3'*R*)-1''-(3-fluorophenyl)-3''-methyl-2,5''-dioxo-1'',5''-dihydro-1'H-dispiro[indoline-3,2'-pyrrole-3',4''-pyrazole]-1,1',4'-**

**tricarboxylate (3f).**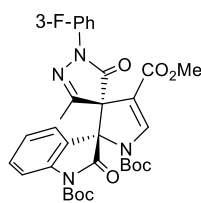

58.3 mg, 94% yield, white solid, mp 80.3 – 83.0 °C; HPLC (Daicel Chiralpak OD-H, n-hexane/2-propanol = 94:6, 1.0 mL/min, at 270 nm):  $t_R = 13.86$  min (minor),  $t_R = 20.33$  min (major); 90% *ee*,  $[\alpha]_D^{20} = -397.8$  ( $c = 0.45$ , MeOH).  $^1\text{H}$  NMR (600 MHz, DMSO- $d_6$ , 60 °C)  $\delta$  8.24 (s, 1H), 7.67 (d,  $J = 7.8$  Hz, 1H), 7.46 (d,  $J = 7.8$  Hz, 1H), 7.41 – 7.39 (m, 1H), 7.37 (dd,  $J = 8.4, 6.6$  Hz, 1H), 7.28 (dd,  $J = 7.2, 1.8$  Hz, 1H), 7.21 (d,  $J = 1.8$  Hz, 1H), 7.19 (dd,  $J = 5.4, 3$  Hz, 1H), 6.99 (td,  $J = 8.4, 2.4$  Hz, 1H), 3.67 (s, 3H), 2.13 (s, 3H).  $^{19}\text{F}$  NMR (565 MHz, DMSO- $d_6$ , 60 °C)  $\delta$  -60.61.  $^{13}\text{C}$  NMR (150 MHz, DMSO- $d_6$ , 60 °C)  $\delta$  170.1, 169.3, 163.3, 162.9, 161.7, 157.3, 148.1 (d,  $J_{\text{CF}} = 139.4$  Hz) , 147.2, 139.2, 138.5 (d,  $J_{\text{CF}} = 10.9$  Hz) , 131.5, 131.4 (d,  $J_{\text{CF}} = 9.2$  Hz) , 126.0, 124.9, 122.1, 114.8, 114.7 (d,  $J_{\text{CF}} = 2.9$  Hz) , 112.7 (d,  $J_{\text{CF}} = 21.0$  Hz) , 107.6, 105.9 (d,  $J_{\text{CF}} = 26.7$  Hz) , 85.9, 84.9, 74.5, 52.4, 28.0, 27.5, 16.3. HRMS (ESI-TOF)  $m/z$ :  $[\text{M}+\text{Na}]^+$  Calcd for  $\text{C}_{32}\text{H}_{33}\text{FN}_4\text{O}_8$  643.2175; Found 643.2173.

**1,1'-di-tert-butyl 4'-methyl (3*R*,3'*R*)-3''-methyl-2,5''-dioxo-1''-(*p*-tolyl)-1'',5''-dihydro-1''H-dispiro[indoline-3,2'-pyrrole-3',4''-pyrazole]-1,1',4'-tricarboxylate (3g).**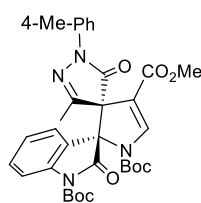

56.7 mg, 92% yield, white solid, mp 106.2 – 108.5 °C; HPLC (Daicel Chiralpak OD-H, n-hexane/2-propanol = 94:6, 1.0 mL/min, at 270 nm):  $t_R = 13.86$  min (minor),  $t_R = 20.33$  min (major); 89% *ee*,  $[\alpha]_D^{20} = -448.9$  ( $c = 0.45$ , MeOH).  $^1\text{H}$  NMR (600 MHz, DMSO- $d_6$ , 60 °C)  $\delta$  8.21 (s, 1H), 7.67 (d,  $J = 8.4$  Hz, 1H), 7.46 (t,  $J = 6.6$  Hz, 1H), 7.40 (t,  $J = 8.4$  Hz, 1H), 7.25 – 7.16 (m, 3H), 7.13 (d,  $J = 8.4$  Hz, 1H), 3.66 (s, 3H), 2.25 (s, 3H), 2.10 (s, 3H), 1.56 (s, 9H), 1.05 (s, 9H).  $^{13}\text{C}$  NMR (150 MHz, DMSO- $d_6$ , 60 °C)  $\delta$  170.3, 169.1, 163.0, 156.3, 149.2, 148.2, 147.0, 139.2, 135.5, 134.7, 131.4, 129.7, 126.1, 124.9, 122.3, 119.5, 114.7, 107.9, 85.9, 84.6, 74.4, 52.3, 28.1, 27.5, 20.9, 16.3. HRMS (ESI-TOF)  $m/z$ :  $[\text{M}+\text{Na}]^+$  Calcd for  $\text{C}_{33}\text{H}_{36}\text{N}_4\text{O}_8$  639.2425; Found 639.2429.

**di-tert-butyl (3*R*,3'*R*)-4'-cyano-3''-methyl-2,5''-dioxo-1''-phenyl-3'',5''-dihydro-1''H-1''14-dispiro[indoline-3,2'-pyrrole-3',4''-pyrazole]-1,1'-dicarboxylate(3h).**

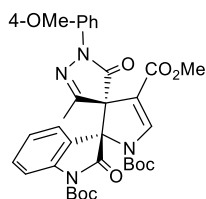

61.4 mg, 97% yield, white solid, mp 110.2 – 112.1 °C; HPLC (Daicel Chiralpak IA, n-hexane/2-propanol = 94:6, 1.0 mL/min, at 270 nm):  $t_R = 28.70$  min (major),  $t_R = 79.70$  min (minor); 92% *ee*,  $[\alpha]_D^{20} = -423.2$  ( $c = 0.45$ , MeOH).  $^1\text{H NMR}$  (600 MHz, DMSO- $d_6$ , 60 °C)  $\delta$  8.21 (s, 1H), 7.69 (d,  $J = 8.4$  Hz, 1H), 7.46 (d,  $J = 7.8$  Hz, 1H), 7.41 (t,  $J = 8.4$  Hz, 1H), 7.22 – 7.19 (m, 3H), 6.90 – 6.89 (m, 2H), 3.72 (s, 3H), 3.67 (s, 3H), 2.09 (s, 3H), 1.57 (s, 9H), 1.05 (s, 9H).  $^{13}\text{C NMR}$  (150 MHz, DMSO- $d_6$ , 60 °C)  $\delta$  170.3, 169.0, 162.9, 157.7, 156.1, 149.1, 148.2, 147.0, 139.3, 131.4, 130.3, 126.1, 124.8, 121.6, 114.7, 114.6, 108.0, 85.8, 84.8, 74.4, 55.9, 52.3, 28.1, 27.5, 16.3. HRMS (ESI-TOF)  $m/z$ :  $[\text{M}+\text{Na}]^+$  Calcd for  $\text{C}_{33}\text{H}_{37}\text{N}_4\text{O}_9$  655.2375; Found 655.2380.

**1,1'-di-tert-butyl 4'-methyl (3*R*,3'*R*)-1''-(4-chlorophenyl)-3''-methyl-2,5''-dioxo-1'',5''-dihydro-1''H-dispiro[indoline-3,2'-pyrrole-3',4''-pyrazole]-1,1',4''-tricarboxylate (3i).**

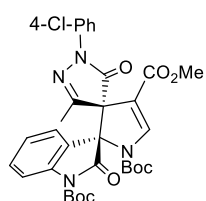

59.9 mg, 94% yield, white solid, mp 130.8 – 133.9 °C; HPLC (Daicel Chiralpak OD-H, n-hexane/2-propanol = 94:6, 1.0 mL/min, at 270 nm):  $t_R = 13.86$  min (minor),  $t_R = 20.33$  min (major); 90% *ee*,  $[\alpha]_D^{20} = -331.1$  ( $c = 0.45$ , MeOH).  $^1\text{H NMR}$  (600 MHz, DMSO- $d_6$ , 60 °C)  $\delta$  8.23 (s, 1H), 7.67 (d,  $J = 7.8$  Hz, 1H), 7.44 (d,  $J = 7.2$  Hz, 1H), 7.42 (d,  $J = 9.0$  Hz, 2H), 7.39 (d,  $J = 2.4$  Hz, 2H), 7.38 (d,  $J = 4.2$  Hz, 1H), 7.19 (t,  $J = 7.8$  Hz, 1H), 3.66 (s, 3H), 2.12 (s, 3H), 1.56 (s, 9H), 1.13 (s, 9H).  $^{13}\text{C NMR}$  (150 MHz, DMSO- $d_6$ , 60 °C)  $\delta$  171.0, 169.2, 162.9, 157.1, 149.1, 148.2, 147.2, 139.2, 135.9, 131.5, 130.1, 129.4, 125.9, 124.9, 120.6, 118.7, 114.8, 107.7, 85.9, 84.9, 74.5, 52.4, 28.1, 27.5, 16.3. HRMS (ESI-TOF)  $m/z$ :  $[\text{M}+\text{Na}]^+$  Calcd for  $\text{C}_{32}\text{H}_{33}\text{ClN}_4\text{O}_8$  659.1879; Found 659.1875.

**1,1'-di-tert-butyl 4'-methyl (3*R*,3'*R*)-3''-methyl-2,5''-dioxo-1''-(4-(trifluoromethyl)phenyl)-1'',5''-dihydro-1''H-dispiro[indoline-3,2'-pyrrole-3',4''-**

**pyrazole]-1,1',4'-tricarboxylate (3j).**

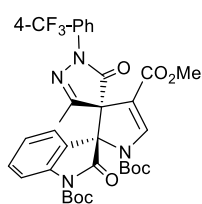

63.0 mg, 94% yield, white solid, mp 118.0 – 120.7 °C; HPLC (Daicel

Chiralpak OD-H, n-hexane/2-propanol = 94:6, 1.0 mL/min, at 270

nm):  $t_R = 4.33$  min (minor),  $t_R = 32.85$  min (major); 92% *ee*,  $[\alpha]_D^{20}$

= -362.2 (*c* = 0.45, MeOH).  $^1\text{H NMR}$  (600 MHz, DMSO-*d*<sub>6</sub>, 60 °C)  $\delta$

8.25 (s, 1H), 7.71 (d, *J* = 9.0 Hz, 2H), 7.66 (d, *J* = 7.8 Hz, 3H), 7.45 (d, *J* = 7.8 Hz, 1H),

7.39 (t, *J* = 7.8 Hz, 1H), 7.19 (t, *J* = 7.8 Hz, 1H), 3.67 (s, 3H), 2.15 (s, 3H), 1.56 (s, 9H),

1.07 (s, 9H).  $^{19}\text{F NMR}$  (565 MHz, DMSO- *d*<sub>6</sub> 60 °C)  $\delta$  -111.06.  $^{13}\text{C NMR}$  (150 MHz,

DMSO-*d*<sub>6</sub>, 60 °C)  $\delta$  170.4, 169.5, 162.9, 157.8, 149.4, 148.1, 147.3, 140.2, 139.2, 131.6,

126.8 (q, *J*<sub>CF</sub> = 3.9 Hz), 126.1, 125.9, 124.9, 123.6 (q, *J*<sub>CF</sub> = 271.8 Hz), 118.7, 114.8,

107.6, 85.9, 85.0, 74.6, 52.5, 28.0, 27.6, 16.4. HRMS (ESI-TOF) *m/z*:  $[\text{M}+\text{Na}]^+$  Calcd

for C<sub>33</sub>H<sub>33</sub>F<sub>3</sub>N<sub>4</sub>O<sub>8</sub> 693.2143; Found 693.2144.

**1,1'-di-tert-butyl 4'-methyl (3*R*,3'*R*)-1''-(2,4-dichlorophenyl)-3''-methyl-2,5''-dioxo-1'',5''-dihydro-1'H-dispiro[indoline-3,2'-pyrrole-3',4''-pyrazole]-1,1',4'-tricarboxylate (3k).**

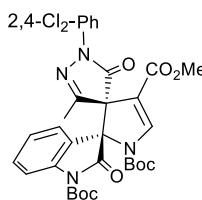

65.1 mg, 97% yield, white solid, mp 94.8 – 99.1 °C; HPLC (Daicel

Chiralpak OD-H, n-hexane/2-propanol = 94:6, 1.0 mL/min, at 270

nm):  $t_R = 13.86$  min (minor),  $t_R = 20.33$  min (major); 80% *ee*,  $[\alpha]_D^{20}$

= -153.3 (*c* = 0.45, MeOH).  $^1\text{H NMR}$  (600 MHz, DMSO-*d*<sub>6</sub>, 60 °C)

$\delta$  8.22 (s, 1H), 7.72 (d, *J* = 7.8 Hz, 1H), 7.66 (d, *J* = 2.4 Hz, 1H), 7.47 (dd, *J* = 9.0, 2.4

Hz, 1H), 7.45 (d, *J* = 7.8 Hz, 1H), 7.39 (d, *J* = 7.8 Hz, 1H), 7.18 (t, *J* = 7.8 Hz, 1H),

7.03 (d, *J* = 8.4 Hz, 1H), 3.71 (s, 3H), 2.11 (s, 3H), 1.58 (s, 9H), 1.06 (s, 9H).  $^{13}\text{C NMR}$

(150 MHz, DMSO-*d*<sub>6</sub>, 60 °C)  $\delta$  169.9, 169.6, 162.9, 157.8, 148.9, 148.3, 146.5, 139.2,

134.6, 133.5, 132.4, 131.5, 130.1, 129.9, 128.8, 126.4, 124.9, 122.7, 114.8, 107.8, 85.6,

84.9, 74.9, 67.6, 52.4, 28.1, 27.5, 16.4. HRMS (ESI-TOF) *m/z*:  $[\text{M}+\text{Na}]^+$  Calcd for

C<sub>32</sub>H<sub>32</sub>Cl<sub>2</sub>N<sub>4</sub>O<sub>8</sub> 693.1489; Found 693.1484.

**1,1'-di-tert-butyl 4'-methyl (3*R*,3'*R*)-1''-(3,4-dichlorophenyl)-3''-methyl-2,5''-dioxo-1'',5''-dihydro-1'H-dispiro[indoline-3,2'-pyrrole-3',4''-pyrazole]-1,1',4'-tricarboxylate (3l).**

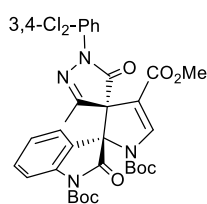

61.8 mg, 92% yield, white solid, mp 105.6 – 108.5 °C; HPLC (Daicel

Chiralpak OD-H, n-hexane/2-propanol = 94:6, 1.0 mL/min, at 270

nm):  $t_R$  = 4.45 min (minor),  $t_R$  = 49.48 min (major); 93% *ee*,  $[\alpha]_D^{20}$

= -411.1 (*c* = 0.45, MeOH).  $^1\text{H}$  NMR (600 MHz, DMSO-*d*<sub>6</sub>, 60 °C)

$\delta$  8.25 (s, 1H), 7.67 (d, *J* = 8.4 Hz, 1H), 7.62 – 7.55 (m, 2H), 7.45 (d, *J* = 2.4 Hz, 1H),

7.43 (d, *J* = 3.0 Hz, 1H), 7.40 (t, *J* = 7.8 Hz, 1H), 7.19 (t, *J* = 7.8 Hz, 1H), 3.67 (s, 3H),

2.14 (s, 3H), 1.56 (s, 9H), 1.07 (s, 9H).  $^{13}\text{C}$  NMR (150 MHz, DMSO-*d*<sub>6</sub>, 60 °C)  $\delta$  170.1,

169.4, 162.9, 162.2, 157.9, 149.1, 148.1, 147.3, 139.2, 136.8, 132.1, 131.6, 127.9, 125.9,

124.9, 122.3, 119.9, 118.7, 114.9, 107.5, 85.9, 84.7, 74.6, 52.4, 28.0, 27.5, 16.3. HRMS

(ESI-TOF) *m/z*:  $[\text{M}+\text{Na}]^+$  Calcd for C<sub>32</sub>H<sub>32</sub>Cl<sub>2</sub>N<sub>4</sub>O<sub>8</sub> 693.1489; Found 693.1491.

**1,1'-di-tert-butyl 4'-ethyl (3*R*,3'*R*)-3''-methyl-2,5''-dioxo-1''-phenyl-1'',5''-dihydro-1'H-dispiro[indoline-3,2'-pyrrole-3',4''-pyrazole]-1,1',4'-tricarboxylate (3n).**

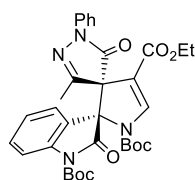

53.7 mg, 87% yield, white solid, mp 144.8 – 147.6 °C; HPLC (Daicel

Chiralpak OD-H, n-hexane/2-propanol = 94:6, 1.0 mL/min, at 270

nm):  $t_R$  = 13.86 min (minor),  $t_R$  = 20.33 min (major); 90% *ee*,  $[\alpha]_D^{20}$

= -42.2 (*c* = 0.45, MeOH).  $^1\text{H}$  NMR (600 MHz, DMSO-*d*<sub>6</sub>, 60 °C)  $\delta$

8.20 (s, 1H), 7.67 (dd, *J* = 8.4, 1.2 Hz, 1H), 7.47 (d, *J* = 7.2 Hz, 1H), 7.40 (t, *J* = 7.8 Hz,

1H), 7.37 – 7.27 (m, 4H), 7.21 (t, *J* = 7.8 Hz, 1H), 7.16 (tt, *J* = 7.2, 1.8 Hz, 1H), 4.10

(dq, *J* = 6.6, 3.0 Hz, 2H), 2.12 (s, 3H), 1.57 (s, 9H), 1.14 (t, *J* = 7.2 Hz, 3H), 1.03 (s,

9H).  $^{13}\text{C}$  NMR (150 MHz, DMSO-*d*<sub>6</sub>, 60 °C)  $\delta$  170.3, 169.3, 162.4, 156.6, 149.3, 148.2,

146.9, 139.2, 137.1, 131.4, 129.4, 126.1, 124.9, 122.4, 119.4, 114.8, 108.2, 85.9, 84.6,

74.5, 61.1, 28.1, 27.6, 16.3, 14.3. HRMS (ESI-TOF) *m/z*:  $[\text{M}+\text{Na}]^+$  Calcd for

C<sub>33</sub>H<sub>36</sub>N<sub>4</sub>O<sub>8</sub> 639.2425; Found 639.2427.

**tri-tert-butyl (3*R*,3'*R*)-3''-methyl-2,5''-dioxo-1''-phenyl-1'',5''-dihydro-1'*H*-dispiro[indoline-3,2'-pyrrole-3',4''-pyrazole]-1,1',4'-tricarboxylate (3o).**

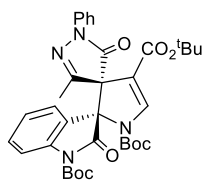

55.8 mg, 93% yield, white solid, mp 160.2 – 162.5 °C; HPLC (Daicel Chiralpak OD-H, n-hexane/2-propanol = 94:6, 1.0 mL/min, at 270 nm):  $t_R = 13.86$  min (minor),  $t_R = 20.33$  min (major); 86% *ee*,  $[\alpha]_D^{20} = -326.7$  ( $c = 0.45$ , MeOH).  $^1\text{H NMR}$  (600 MHz, DMSO- $d_6$ , 60 °C)  $\delta$  8.12 (s, 1H), 7.66 (d,  $J = 7.8$  Hz, 1H), 7.47 (d,  $J = 7.2$  Hz, 1H), 7.40 (d,  $J = 7.2$  Hz, 1H), 7.37-7.31 (m, 4H), 7.20 (t,  $J = 7.2$  Hz, 1H), 7.15 (t,  $J = 7.2$  Hz, 1H), 2.13 (s, 3H), 1.56 (s, 9H), 1.31 (s, 9H), 1.03 (s, 9H).  $^{13}\text{C NMR}$  (150 MHz, DMSO- $d_6$ , 60 °C)  $\delta$  170.2, 169.3, 161.5, 156.7, 149.3, 148.2, 146.6, 139.2, 137.2, 131.4, 129.4, 126.5, 126.0, 124.8, 119.2, 114.7, 109.3, 85.8, 84.8, 82.1, 74.6, 28.13, 28.06, 27.5, 16.4. HRMS (ESI-TOF)  $m/z$ :  $[\text{M}+\text{Na}]^+$  Calcd for  $\text{C}_{35}\text{H}_{40}\text{N}_4\text{O}_8$  667.2738; Found 667.2340.

**di-tert-butyl (3*R*,3'*R*)-4'-cyano-3''-methyl-2,5''-dioxo-1''-phenyl-1'',5''-dihydro-1'*H*-dispiro[indoline-3,2'-pyrrole-3',4''-pyrazole]-1,1'-dicarboxylate (3p).**

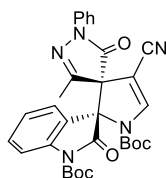

51.3 mg, 90% yield, white solid, mp 92.5 – 95.3 °C; HPLC (Daicel Chiralpak OD-H, n-hexane/2-propanol = 94:6, 1.0 mL/min, at 270 nm):  $t_R = 13.86$  min (minor),  $t_R = 20.33$  min (major); 97% *ee*,  $[\alpha]_D^{20} = -402.2$  ( $c = 0.45$ , MeOH).  $^1\text{H NMR}$  (600 MHz, DMSO- $d_6$ , 60 °C)  $\delta$  8.78 (s, 1H), 7.69 (d,  $J = 8.4$  Hz, 1H), 7.51 (d,  $J = 7.8$  Hz, 1H), 7.44 (t,  $J = 7.8$  Hz, 1H), 7.39 (dd,  $J = 9.0, 1.8$  Hz, 2H), 7.37 (dd,  $J = 8.4, 6.6$  Hz, 2H), 7.26 – 7.18 (m, 2H), 3.19 (s, 3H), 2.24 (s, 3H), 1.57 (s, 9H), 1.11 (s, 9H).  $^{13}\text{C NMR}$  (150 MHz, DMSO- $d_6$ , 60 °C)  $\delta$  169.7, 167.9, 155.1, 152.9, 148.6, 148.1, 139.4, 136.6, 131.8, 129.6, 126.7, 126.2, 125.1, 119.5, 115.0, 113.5, 86.2, 85.4, 74.2, 28.0, 27.5, 16.2. HRMS (ESI-TOF)  $m/z$ :  $[\text{M}+\text{Na}]^+$  Calcd for  $\text{C}_{31}\text{H}_{31}\text{N}_5\text{O}_6$  592.2167; Found 592.2168.

**1,1'-di-tert-butyl 4'-methyl (3*R*,3'*R*)-3'',5-dimethyl-2,5''-dioxo-1''-phenyl-1'',5''-dihydro-1'*H*-dispiro[indoline-3,2'-pyrrole-3',4''-pyrazole]-1,1',4'-tricarboxylate (3r).**

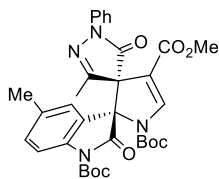

58.6 mg, 95% yield, white solid, mp 118.2 – 121.1 °C; HPLC (Daicel Chiralpak OD-H, n-hexane/2-propanol = 94:6, 1.0 mL/min, at 270 nm):  $t_R$  = 13.86 min (minor),  $t_R$  = 20.33 min (major); 90% *ee*,  $[\alpha]_D^{20}$  = -302.8 ( $c$  = 0.45, MeOH).  $^1\text{H}$  NMR (600 MHz, DMSO- $d_6$ , 60 °C)  $\delta$  8.21 (s, 1H), 7.54 (d,  $J$  = 8.4 Hz, 1H), 7.36 (dd,  $J$  = 9.0, 1.8 Hz, 2H), 7.34 (dd,  $J$  = 9.0, 7.2 Hz, 2H), 7.27 (s, 1H), 7.20 – 7.17 (m, 1H), 7.16 (dt,  $J$  = 7.2, 1.8 Hz, 1H), 3.66 (s, 3H), 2.24 (s, 3H), 2.10 (s, 3H), 1.55 (s, 9H), 1.09 (s, 9H).  $^{13}\text{C}$  NMR (150 MHz, DMSO- $d_6$ , 60 °C)  $\delta$  170.3, 169.2, 163.0, 156.5, 149.4, 148.2, 147.1, 137.1, 136.9, 134.3, 131.6, 129.3, 126.2, 126.1, 119.1, 118.7, 114.6, 107.8, 85.7, 84.7, 74.5, 52.4, 28.1, 27.6, 20.9, 16.3. HRMS (ESI-TOF)  $m/z$ :  $[\text{M}+\text{Na}]^+$  Calcd for  $\text{C}_{33}\text{H}_{36}\text{N}_4\text{O}_8$  639.2425; Found 639.2428.

**1,1'-di-tert-butyl 4'-methyl (3R,3'R)-5-methoxy-3''-methyl-2,5''-dioxo-1''-phenyl-1'',5''-dihydro-1'H-dispiro[indoline-3,2'-pyrrole-3',4''-pyrazole]-1,1',4'-tricarboxylate (3s).**

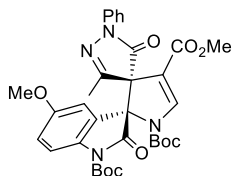

50.6 mg, 80% yield, white solid, mp 90.5 – 93.3 °C; HPLC (Daicel Chiralpak OD-H, n-hexane/2-propanol = 94:6, 1.0 mL/min, at 270 nm):  $t_R$  = 13.86 min (minor),  $t_R$  = 20.33 min (major); 89% *ee*,  $[\alpha]_D^{20}$  = -331.1 ( $c$  = 0.45, MeOH).  $^1\text{H}$  NMR (600 MHz, DMSO- $d_6$ , 60 °C)  $\delta$  8.21 (s, 1H), 7.59 (d,  $J$  = 9.0 Hz, 1H), 7.38 (dd,  $J$  = 8.4, 1.8 Hz, 2H), 7.34 (dd,  $J$  = 9.0, 7.2 Hz, 2H), 7.18 (tt,  $J$  = 7.2, 1.2 Hz, 1H), 7.02 (s, 1H), 6.96 (dd,  $J$  = 9.0, 2.4 Hz, 1H), 3.69 (s, 3H), 3.67 (s, 3H), 2.10 (s, 3H), 1.56 (s, 9H), 1.09 (s, 9H).  $^{13}\text{C}$  NMR (150 MHz, DMSO- $d_6$ , 60 °C)  $\delta$  170.3, 169.3, 163.0, 156.8, 156.5, 149.3, 148.3, 147.2, 137.1, 132.4, 129.4, 126.1, 119.2, 116.7, 115.9, 112.1, 107.6, 85.6, 84.9, 74.5, 56.3, 52.4, 28.0, 27.6, 16.3. HRMS (ESI-TOF)  $m/z$ :  $[\text{M}+\text{Na}]^+$  Calcd for  $\text{C}_{33}\text{H}_{36}\text{N}_4\text{O}_9$  655.2374; Found 655.2373.

**1,1'-di-tert-butyl 4'-methyl (3R,3'R)-5-fluoro-3''-methyl-2,5''-dioxo-1''-phenyl-1'',5''-dihydro-1'H-dispiro[indoline-3,2'-pyrrole-3',4''-pyrazole]-1,1',4'-**



**tricarboxylate (3t).**

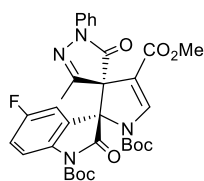

60.2 mg, 97% yield, white solid, mp 70.2 – 73.0 °C; HPLC (Daicel Chiralpak OD-H, n-hexane/2-propanol = 94:6, 1.0 mL/min, at 270 nm):  $t_R = 13.86$  min (minor),  $t_R = 20.33$  min (major); 92% *ee*,  $[\alpha]_D^{20} = -315.6$  ( $c = 0.45$ , MeOH).  $^1\text{H}$  NMR (600 MHz, DMSO- $d_6$ , 60 °C)  $\delta$  8.21 (s, 1H), 7.69 (dd,  $J = 9.0, 4.8$  Hz, 1H), 7.42 – 7.33 (m, 4H), 7.28 – 7.25 (m, 2H), 7.19 (tt,  $J = 7.2, 1.8$  Hz, 1H), 3.67 (s, 3H), 2.12 (s, 3H), 1.55 (s, 9H), 1.10 (s, 9H).  $^{19}\text{F}$  NMR (565 MHz, DMSO- $d_6$ , 60 °C)  $\delta$  -117.26.  $^{13}\text{C}$  NMR (150 MHz, DMSO- $d_6$ , 60 °C)  $\delta$  169.8, 169.0, 162.9, 160.0 (d,  $J_{\text{CF}} = 242.8$  Hz) , 156.8, 148.9, 148.0, 147.0, 137.1, 135.3, 129.5, 129.4, 126.2, 119.2, 118.1 (d,  $J_{\text{CF}} = 23.3$  Hz) , 116.6 (d,  $J_{\text{CF}} = 8.0$  Hz) , 113.6 (d,  $J_{\text{CF}} = 22.9$  Hz) , 107.8, 86.1, 85.1, 74.2, 52.4, 28.0, 27.6, 16.3. HRMS (ESI-TOF)  $m/z$ :  $[\text{M}+\text{Na}]^+$  Calcd for  $\text{C}_{32}\text{H}_{33}\text{FN}_4\text{O}_8$  643.2175; Found 643.2178.

**1,1'-di-tert-butyl 4'-methyl (3*R*,3'*R*)-5-bromo-3''-methyl-2,5''-dioxo-1''-phenyl-1'',5''-dihydro-1'H-dispiro[indoline-3,2'-pyrrole-3',4''-pyrazole]-1,1',4'-tricarboxylate (3u).**

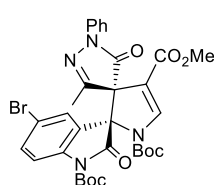

62.7mg, 92% yield, white solid, mp 97.8 – 101.6 °C; HPLC (Daicel Chiralpak OD-H, n-hexane/2-propanol = 94:6, 1.0 mL/min, at 270 nm):  $t_R = 13.86$  min (minor),  $t_R = 20.33$  min (major); 90% *ee*,  $[\alpha]_D^{20} = -131.1$  ( $c = 0.45$ , MeOH).  $^1\text{H}$  NMR (600 MHz, DMSO- $d_6$ , 60 °C)  $\delta$  8.22 (s, 1H), 7.61 (m, 2H), 7.50 – 7.28 (m, 4H), 7.20 (tt,  $J = 7.2, 1.8$  Hz, 1H), 3.67 (s, 3H), 2.11 (s, 3H), 1.55 (s, 9H), 1.13 (s, 9H).  $^{13}\text{C}$  NMR (150 MHz, DMSO- $d_6$ , 60 °C)  $\delta$  169.5, 169.1, 162.9, 156.6, 147.9, 147.1, 138.3, 137.0, 134.2, 129.5, 129.4, 128.6, 126.3, 119.3, 119.2, 117.0, 116.9, 107.8, 86.4, 85.3, 73.9, 71.1, 52.4, 28.0, 27.6, 16.3. HRMS (ESI-TOF)  $m/z$ :  $[\text{M}+\text{Na}]^+$  Calcd for  $\text{C}_{32}\text{H}_{33}\text{BrN}_4\text{O}_8$  703.1374; Found 703.1372.

**1,1'-di-tert-butyl 4'-methyl (3*R*,3'*R*)-3''-methyl-5-nitro-2,5''-dioxo-1''-phenyl-1'',5''-dihydro-1'H-dispiro[indoline-3,2'-pyrrole-3',4''-pyrazole]-1,1',4'-**

**tricarboxylate (3v).**

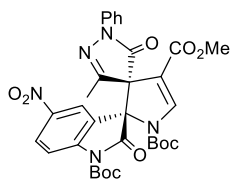

61.7 mg, 95% yield, white solid, mp 144.5 – 147.4 °C; HPLC (Daicel Chiralpak OD-H, n-hexane/2-propanol = 94:6, 1.0 mL/min, at 270 nm):  $t_R = 13.86$  min (minor),  $t_R = 20.33$  min (major); 91% *ee*,  $[\alpha]_D^{20} = -348.9$  ( $c = 0.45$ , MeOH). <sup>1</sup>H NMR (600 MHz, DMSO-*d*<sub>6</sub>, 60 °C)  $\delta$  8.39 – 8.29 (m, 2H), 8.27 (s, 1H), 7.90 (d,  $J = 9.0$  Hz, 1H), 7.38 – 7.34 (m, 2H), 7.32 (dd,  $J = 7.8, 1.8$  Hz, 2H), 7.17 (tt,  $J = 7.2, 1.2$  Hz 1H), 3.68 (s, 3H), 2.14 (s, 3H), 1.57 (s, 9H), 1.12 (s, 9H). <sup>13</sup>C NMR (150 MHz, DMSO-*d*<sub>6</sub>, 60 °C)  $\delta$  171.2, 168.8, 162.8, 156.8, 147.5, 147.1, 144.3, 144.1, 142.6, 136.9, 129.5, 127.7, 126.3, 121.1, 119.1, 118.9, 115.8, 111.2, 87.2, 85.8, 73.6, 52.5, 27.9, 27.6, 16.3. HRMS (ESI-TOF)  $m/z$ :  $[M+Na]^+$  Calcd for C<sub>32</sub>H<sub>33</sub>N<sub>5</sub>O<sub>10</sub> 670.2120; Found 670.2122.

**1,1'-di-tert-butyl 4'-methyl (3*R*,3'*R*)-5-chloro-3''-methyl-2,5''-dioxo-1''-phenyl-1'',5''-dihydro-1'H-dispiro[indoline-3,2'-pyrrole-3',4''-pyrazole]-1,1',4'-tricarboxylate (3w).**

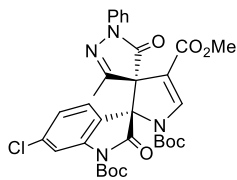

61.8 mg, 97% yield, white solid, mp 66.8 – 67.9 °C; HPLC (Daicel Chiralpak OD-H, n-hexane/2-propanol = 94:6, 1.0 mL/min, at 270 nm):  $t_R = 13.86$  min (minor),  $t_R = 20.33$  min (major); 91% *ee*,  $[\alpha]_D^{20} = -293.3$  ( $c = 0.45$ , MeOH). <sup>1</sup>H NMR (600 MHz, DMSO-*d*<sub>6</sub>, 60 °C)  $\delta$  8.22 (s, 1H), 7.71 (d,  $J = 1.8$  Hz, 1H), 7.50 (d,  $J = 7.8$  Hz, 1H), 7.39 (dd,  $J = 8.4, 1.2$  Hz, 2H), 7.36 (dd,  $J = 8.4, 7.2$  Hz, 2H), 7.30 (d,  $J = 8.4$  Hz, 1H), 7.19 (td,  $J = 7.2, 1.2$  Hz, 1H), 3.66 (s, 3H), 2.12 (s, 3H), 1.56 (s, 9H), 1.09 (s, 9H). <sup>13</sup>C NMR (150 MHz, DMSO-*d*<sub>6</sub>, 60 °C)  $\delta$  169.9, 169.0, 162.8, 156.6, 148.5, 146.9, 140.2, 137.1, 135.8, 133.2, 129.4, 127.7, 126.2, 124.9, 119.4, 118.7, 115.1, 107.9, 86.5, 85.0, 74.1, 52.4, 27.9, 27.6, 16.3. HRMS (ESI-TOF)  $m/z$ :  $[M+Na]^+$  Calcd for C<sub>32</sub>H<sub>33</sub>ClN<sub>4</sub>O<sub>8</sub> 659.1879; Found 659.1871.

**1,1'-di-tert-butyl 4'-methyl (3*R*,3'*R*)-6-bromo-3''-methyl-2,5''-dioxo-1''-phenyl-1'',5''-dihydro-1'H-dispiro[indoline-3,2'-pyrrole-3',4''-pyrazole]-1,1',4'-**

**tricarboxylate (3x).**

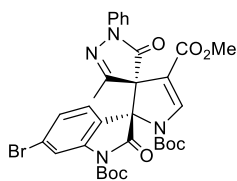

62.0 mg, 91% yield, white solid, mp 118.2 – 121.1 °C; HPLC (Daicel Chiralpak OD-H, n-hexane/2-propanol = 94:6, 1.0 mL/min, at 270 nm):  $t_R = 13.86$  min (minor),  $t_R = 20.33$  min (major); 91% *ee*,  $[\alpha]_D^{20} = -255.6$  ( $c = 0.45$ , MeOH). <sup>1</sup>H NMR (600 MHz, DMSO-*d*<sub>6</sub>, 60 °C)  $\delta$  8.22 (s, 1H), 7.85 (d,  $J = 1.8$ Hz, 1H), 7.47 – 7.41 (m, 2H), 7.39 (dd,  $J = 8.4$ , 1.8Hz, 2H), 7.36 (dd,  $J = 8.4$ , 7.2 Hz, 2H), 7.19 (tt,  $J = 7.2$ , 1.8 Hz, 1H), 3.66 (s, 3H), 2.11 (s, 3H), 1.56 (s, 9H), 1.13 (s, 9H). <sup>13</sup>C NMR (150 MHz, DMSO-*d*<sub>6</sub>, 60 °C)  $\delta$  169.8, 169.0, 162.8, 156.6, 149.0, 147.9, 146.9, 140.3, 137.0, 129.4, 127.8, 126.3, 124.1, 119.4, 118.7, 117.8, 107.9, 86.5, 85.2, 74.1, 52.4, 27.9, 27.6, 16.3. HRMS (ESI-TOF)  $m/z$ :  $[M+Na]^+$  Calcd for C<sub>32</sub>H<sub>33</sub>BrN<sub>4</sub>O<sub>8</sub> 703.1374; Found 703.1373.

**1,1'-di-tert-butyl 4'-methyl (3*R*,3'*R*)-3'',7-dimethyl-2,5''-dioxo-1''-phenyl-1'',5''-dihydro-1''H-dispiro[indoline-3,2'-pyrrole-3',4''-pyrazole]-1,1',4'-tricarboxylate (3y).**

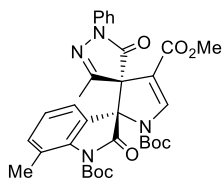

57.3 mg, 93% yield, white solid, mp 73.6 – 75.2 °C; HPLC (Daicel Chiralpak OD-H, n-hexane/2-propanol = 94:6, 1.0 mL/min, at 270 nm):  $t_R = 13.86$  min (minor),  $t_R = 20.33$  min (major); 94% *ee*,  $[\alpha]_D^{20} = -418.9$  ( $c = 0.45$ , MeOH). <sup>1</sup>H NMR (600 MHz, DMSO-*d*<sub>6</sub>, 60 °C)  $\delta$  8.20 (s, 1H), 7.37 (dd,  $J = 8.4$ , 1.8 Hz, 2H), 7.33 (dd,  $J = 8.4$ , 7.2 Hz, 2H), 7.29 (d,  $J = 7.8$  Hz, 1H), 7.20 (d,  $J = 7.2$  Hz, 1H), 7.16 (tt,  $J = 7.2$ , 1.2 Hz, 1H), 7.10 (t,  $J = 7.8$  Hz, 1H), 3.66 (s, 3H), 2.12 (s, 3H), 2.11 (s, 9H), 1.53 (s, 9H). <sup>13</sup>C NMR (150 MHz, DMSO-*d*<sub>6</sub>, 60 °C)  $\delta$  171.3, 169.2, 163.0, 156.6, 149.2, 148.4, 146.9, 137.7, 137.2, 133.9, 129.3, 126.0, 124.7, 123.6, 123.3, 119.4, 118.7, 108.0, 86.3, 84.8, 74.9, 69.0, 52.3, 27.6, 27.5, 18.9, 16.3. HRMS (ESI-TOF)  $m/z$ :  $[M+Na]^+$  Calcd for C<sub>33</sub>H<sub>36</sub>N<sub>4</sub>O<sub>8</sub> 639.2425; Found 639.2421.

**1,1'-di-tert-butyl 4'-methyl (3*R*,3'*R*)-7-bromo-3''-methyl-2,5''-dioxo-1''-phenyl-1'',5''-dihydro-1''H-dispiro[indoline-3,2'-pyrrole-3',4''-pyrazole]-1,1',4'-**

**tricarboxylate (3z).**

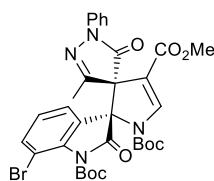

66.1 mg, 97% yield, white solid, mp 90.1 – 92.1 °C; HPLC (Daicel Chiralpak OD-H, n-hexane/2-propanol = 94:6, 1.0 mL/min, at 270 nm):  $t_R$  = 13.86 min (minor),  $t_R$  = 20.33 min (major); 93% *ee*,  $[\alpha]_D^{20}$  = -304.4 ( $c$  = 0.45, MeOH). <sup>1</sup>H NMR (600 MHz, DMSO-*d*<sub>6</sub>, 60 °C)  $\delta$  8.21 (s, 1H), 7.61 (dd,  $J$  = 8.4, 1.2 Hz, 1H), 7.47 (d,  $J$  = 7.2 Hz, 1H), 7.38 (dd,  $J$  = 9.0, 1.8 Hz, 2H), 7.35 (dd,  $J$  = 9.0, 7.2 Hz, 2H), 7.18 (tt,  $J$  = 7.2, 1.2 Hz, 1H), 7.15 (t,  $J$  = 7.8 Hz, 1H), 3.66 (s, 3H), 2.12 (s, 3H), 1.51 (s, 9H), 1.13 (s, 9H). <sup>13</sup>C NMR (150 MHz, DMSO-*D*<sub>6</sub>, 60 °C)  $\delta$  170.8, 168.9, 162.8, 156.8, 148.9, 146.8, 146.7, 137.8, 137.1, 135.7, 129.4, 126.4, 126.2, 125.4, 119.4, 108.1, 106.3, 86.9, 85.2, 75.1, 52.4, 27.6, 27.2, 16.3. HRMS (ESI-TOF)  $m/z$ :  $[M+Na]^+$  Calcd for C<sub>32</sub>H<sub>33</sub>BrN<sub>4</sub>O<sub>8</sub> 703.1374; Found 703.1373.

**1'-(tert-butyl) 4'-methyl (3*R*,3'*R*)-1,3''-dimethyl-2,5''-dioxo-1''-phenyl-1'',5''-dihydro-1'H-dispiro[indoline-3,2'-pyrrole-3',4''-pyrazole]-1',4'-dicarboxylate (3aa).**

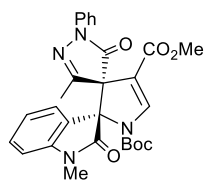

24.8 mg, 48% yield, yellow solid, mp 179.2 – 182.0 °C; HPLC (Daicel Chiralpak OD-H, n-hexane/2-propanol = 94:6, 1.0 mL/min, at 270 nm):  $t_R$  = 13.86 min (minor),  $t_R$  = 20.33 min (major); 84% *ee*,  $[\alpha]_D^{20}$  = -348.9 ( $c$  = 0.45, MeOH). <sup>1</sup>H NMR (600 MHz, DMSO-*d*<sub>6</sub>, 60 °C)  $\delta$  8.18 (s, 1H), 7.41 (dd,  $J$  = 8.4, 1.2 Hz, 2H), 7.39 (d,  $J$  = 7.2 Hz, 1H), 7.34 (d,  $J$  = 1.8 Hz, 1H), 7.34 – 7.31 (m, 2H), 7.15 (tt,  $J$  = 7.2, 1.2 Hz, 1H), 7.09 – 6.96 (m, 2H), 3.65 (s, 3H), 3.15 (s, 3H), 2.07 (s, 3H), 1.04 (s, 9H). <sup>13</sup>C NMR (150 MHz, DMSO-*d*<sub>6</sub>, 60 °C)  $\delta$  172.1, 169.7, 163.1, 157.1, 149.3, 147.1, 143.9, 138.7, 137.3, 131.1, 129.3, 125.9, 125.7, 122.9, 119.3, 111.1, 109.7, 108.3, 84.2, 74.2, 52.2, 27.6, 27.1, 16.4. HRMS (ESI-TOF)  $m/z$ :  $[M+Na]^+$  Calcd for C<sub>28</sub>H<sub>28</sub>N<sub>4</sub>O<sub>6</sub> 539.1901; Found 539.1902.

**1'-(tert-butyl) 4'-methyl (3*R*,3'*R*)-3''-methyl-2,5''-dioxo-1''-phenyl-1-tosyl-1'',5''-dihydro-1'H-dispiro[indoline-3,2'-pyrrole-3',4''-pyrazole]-1',4'-dicarboxylate (3bb).**

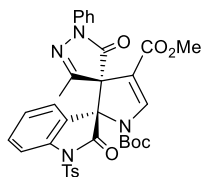

61.7 mg, 94% yield, white solid, mp 173.9 – 176.8 °C; HPLC (Daicel Chiralpak OD-H, n-hexane/2-propanol = 94:6, 1.0 mL/min, at 270 nm):  $t_R = 13.86$  min (minor),  $t_R = 20.33$  min (major); 95% *ee*,  $[\alpha]_D^{20} = -324.4$  ( $c = 0.45$ , MeOH).  $^1\text{H NMR}$  (600 MHz, DMSO- $d_6$ , 60 °C)  $\delta$  8.18 (s, 1H), 7.98 (s, 2H), 7.75 (d,  $J = 7.8$  Hz, 1H), 7.47 – 7.41 (m, 4H), 7.38 – 7.30 (m, 4H), 7.26 – 7.09 (m, 2H), 3.66 (s, 3H), 2.36 (s, 3H), 2.11 (s, 3H), 0.66 (s, 9H).  $^{13}\text{C NMR}$  (150 MHz, DMSO- $d_6$ , 60 °C)  $\delta$  170.5, 169.0, 162.8, 156.4, 146.7, 137.1, 133.9, 131.9, 130.8, 129.4, 128.4, 126.8, 126.2, 125.3, 122.7, 119.4, 113.3, 107.8, 84.1, 74.6, 52.4, 27.1, 21.6, 16.3. HRMS (ESI-TOF)  $m/z$ :  $[\text{M}+\text{Na}]^+$  Calcd for  $\text{C}_{34}\text{H}_{32}\text{N}_4\text{O}_8$  679.1833; Found 679.1835.

**1'-(tert-butyl) 4'-methyl (3*R*,3'*R*)-3''-methyl-2,5''-dioxo-1-(2-oxo-2-phenyl-112-ethyl)-1''-phenyl-1'',5''-dihydro-1'H-dispiro[indoline-3,2'-pyrrole-3',4''-pyrazole]-1',4'-dicarboxylate (3cc).**

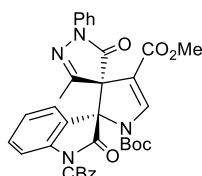

60.5 mg, 95% yield, white solid, mp 110.2 – 114.0 °C; HPLC (Daicel Chiralpak OD-H, n-hexane/2-propanol = 94:6, 1.0 mL/min, at 270 nm):  $t_R = 13.86$  min (minor),  $t_R = 20.33$  min (major); 91% *ee*,  $[\alpha]_D^{20} = -304.4$  ( $c = 0.45$ , MeOH).  $^1\text{H NMR}$  (600 MHz, DMSO- $d_6$ , 60 °C)  $\delta$  8.23 (s, 1H), 7.76 (d,  $J = 8.4$  Hz, 1H), 7.60 – 7.45 (m, 3H), 7.44 – 7.38 (m, 3H), 7.34 (m, 5H), 7.22 (t,  $J = 7.8$  Hz, 1H), 7.16 (tt,  $J = 7.2, 1.2$  Hz, 1H), 5.49 (s, 2H), 3.66 (s, 3H), 2.08 (s, 3H), 1.01 (s, 9H).  $^{13}\text{C NMR}$  (150 MHz, DMSO- $d_6$ , 60 °C)  $\delta$  170.1, 169.1, 162.9, 156.5, 149.8, 149.0, 146.9, 138.9, 137.1, 135.4, 131.5, 129.4, 129.1, 128.9, 128.4, 126.2, 126.1, 125.2, 122.5, 119.4, 114.9, 107.9, 85.0, 74.5, 68.8, 52.4, 27.5, 16.4. HRMS (ESI-TOF)  $m/z$ :  $[\text{M}+\text{Na}]^+$  Calcd for  $\text{C}_{35}\text{H}_{32}\text{N}_4\text{O}_8$  659.2112; Found 659.2115.

## 6. Gram-scale reaction and deprotection of product **3a**

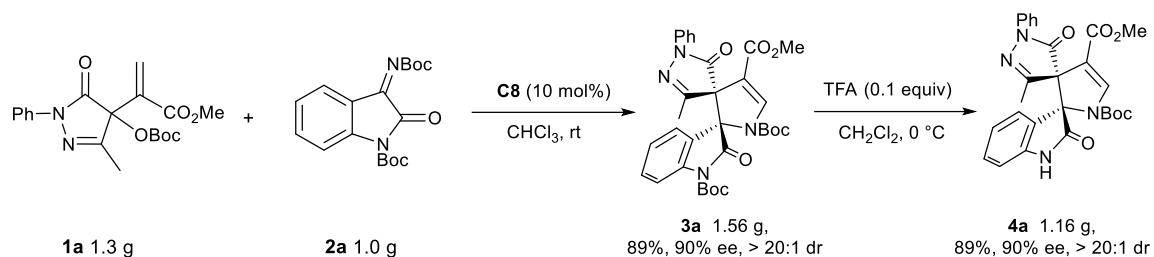

MBH Carbonate of pyrazolinone **1a** (1.3 g, 3.47 mmol), 3-((tert-butoxycarbonyl)imino)-2-oxoindoline-1-carboxylate **2a** (1.0 g, 2.89 mmol), and catalyst **C8** (262.3 mg, 0.29 mmol) were dissolved in  $\text{CHCl}_3$  (5.0 mL), and the mixture was stirred at room temperature for 48 h. After completion of the reaction, the reaction mixture was concentrated and directly purified by flash column chromatography on silica gel (petroleum ether/ethyl acetate = 20/1) to afford the pure product **3a** (1.56 g, 89% yield, 90% ee, >20:1 dr) as a white solid.

The compound **4a** were prepared by a modified reported procedure. The corresponding chiral compound **3a** (1.56 g, 2.59 mmol) was dissolved in 5.0 mL  $\text{CH}_2\text{Cl}_2$  and add TFA (193.18  $\mu\text{L}$ , 0.26 mmol) at 0 °C, then stirred for about 8 h at room temperature. The solution was concentrated when the reaction was completed under vacuum. The residue was then dissolved in dry ethyl acetate and washed with brine several times. The organic phase was dried over anhydrous  $\text{MgSO}_4$  and concentrated under vacuum. The crude product was purified *via* flash chromatography (eluent: petroleum ether/ethyl acetate = 5/1 to 3/1) to give compound **4a**.

## 7. Structural diversity construction of product 3a

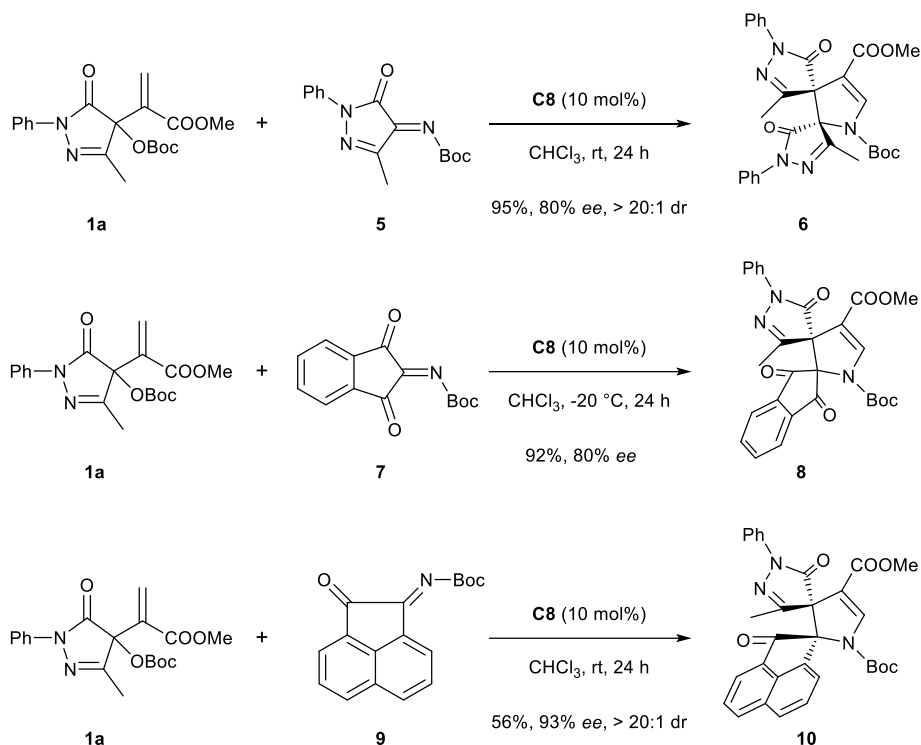

MBH Carbonate of Pyrazolinone **1a** (0.12 mmol), **5**, **7** and **9** (0.10 mmol), and catalyst **C8** (9.1 mg, 0.01 mmol) were dissolved in  $\text{CHCl}_3$  (0.5 mL), and the mixture was stirred at room temperature for 24 h. After completion of the reaction, the reaction mixture was concentrated and directly purified by flash column chromatography on silica gel (petroleum ether/ethyl acetate = 20/1 to 5/1) to afford the pure products **6**, **8** and **10**.

### 1'-(tert-butyl) 4'-methyl (3*R*,3'*R*)-3'-methyl-2,5'-dioxo-1'-phenyl-1'',5''-dihydro-1'H-dispiro[indoline-3,2'-pyrrole-3',4'-pyrazole]-1',4'-dicarboxylate (**4a**).

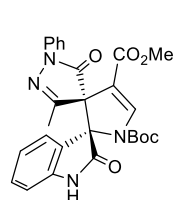

44.7 mg, 89% yield, yellow solid, mp 80.3 – 83.0 °C; HPLC (Daicel Chiralpak OD-H, n-hexane/2-propanol = 94:6, 1.0 mL/min, at 270 nm):  $t_R = 13.86$  min (minor),  $t_R = 20.33$  min (major); 90% ee,  $[\alpha]_D^{20} = -397.8$  ( $c = 0.45$ , MeOH).  $^1\text{H NMR}$  (600 MHz,  $\text{DMSO}-d_6$ , 60 °C)  $\delta$  10.75 (s, 1H), 8.16 (s, 1H), 7.44 – 7.40 (dd,  $J = 9.0, 1.2$  Hz, 2H), 7.34 – 7.31 (m, 3H), 7.21 (t,  $J = 7.8$  Hz, 1H), 7.15 (td,  $J = 7.2, 1.2$  Hz, 1H), 6.93 (t,  $J = 8.4$  Hz, 1H), 6.81 (d,  $J = 7.8$

Hz, 1H), 3.65 (s, 3H), 2.13 (s, 3H), 1.11 (s, 9H). <sup>13</sup>C NMR (150 MHz, DMSO-*d*<sub>6</sub>, 60 °C) δ 173.6, 169.8, 163.2, 157.4, 149.4, 147.1, 142.6, 138.9, 137.4, 130.9, 129.3, 126.1, 125.8, 122.1, 119.2, 110.8, 108.1, 84.2, 74.7, 52.2, 27.6, 16.6. HRMS (ESI-TOF) *m/z*: [M+Na]<sup>+</sup> Calcd for C<sub>27</sub>H<sub>26</sub>N<sub>4</sub>O<sub>6</sub> 525.1745; Found 525.1754.

**11-(tert-butyl) 13-methyl (5*R*,6*R*)-1,10-dimethyl-4,7-dioxo-3,8-diphenyl-2,3,8,9,11-pentaazadispiro[4.0.4<sup>6</sup>.3<sup>5</sup>]trideca-1,9,12-triene-11,13-dicarboxylate (6).**

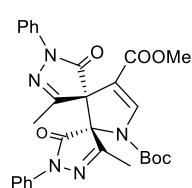

51.6 mg, 95% yield, white solid, mp 82.3 – 83.0 °C; HPLC (Daicel Chiralpak OD-H, n-hexane/2-propanol = 94:6, 1.0 mL/min, at 270 nm): *t<sub>R</sub>* = 8.15 min (minor), *t<sub>R</sub>* = 10.28 min (major); 80% *ee*, [α]<sub>D</sub><sup>20</sup> = -162.9 (c = 0.45, MeOH). <sup>1</sup>H NMR (600 MHz, DMSO-*d*<sub>6</sub>, 60 °C) δ 8.15 (s, 1H), 7.65 – 7.59 (m, 4H), 7.43 – 7.38 (m, 4H), 7.23 – 7.20 (m, 2H), 3.68 (s, 3H), 2.26 (s, 3H), 2.21 (s, 3H), 1.31 (s, 9H). <sup>13</sup>C NMR (150 MHz, DMSO-*d*<sub>6</sub>, 60 °C) δ 168.5, 166.9, 162.4, 158.4, 144.8, 137.5, 137.4, 129.7, 129.6, 126.4, 126.3, 119.6, 119.2, 109.6, 86.1, 77.3, 52.6, 27.9, 16.4, 16.2. HRMS (ESI-TOF) *m/z*: [M+Na]<sup>+</sup> Calcd for C<sub>29</sub>H<sub>29</sub>N<sub>5</sub>O<sub>6</sub> 566.2016; Found 566.2010.

**tert-butyl (R)-3''-methyl-4''-((methylperoxy)-12-methyl)-1,3,5''-trioxo-1''-phenyl-1,1'',3,5''-tetrahydro-1'H-dispiro[indene-2,2'-pyrrole-3',4''-pyrazole]-1'-carboxylate (8).**

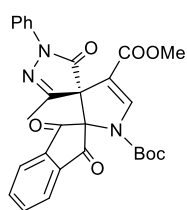

47.5 mg, 92% yield, white solid, mp 90.2 – 92.1 °C; HPLC (Daicel Chiralpak OD-H, n-hexane/2-propanol = 80:20, 1.0 mL/min, at 270 nm): *t<sub>R</sub>* = 15.35 min (minor), *t<sub>R</sub>* = 22.68 min (major); 80% *ee*, [α]<sub>D</sub><sup>20</sup> = -99.9 (c = 0.45, MeOH). <sup>1</sup>H NMR (600 MHz, DMSO-*d*<sub>6</sub>, 100 °C) δ 8.15 (s, 1H), 8.03 – 8.01 (m, 3H), 7.97 – 7.94 (m, 1H), 7.30 – 7.26 (m, 2H), 7.24 – 7.22 (m, 2H), 7.16 – 7.13 (m, 1H), 3.64 (s, 3H), 2.15 (s, 3H), 1.47 (s, 4H), 1.05 (s, 5H). <sup>13</sup>C NMR (150 MHz, DMSO-*d*<sub>6</sub>, 100 °C) δ 167.9, 162.5, 157.7, 146.0, 140.4, 139.8, 138.5, 137.7, 137.2, 129.3, 126.3, 124.7, 124.3, 119.6, 108.2, 85.6, 78.7, 52.3, 27.5, 15.4. HRMS (ESI-TOF) *m/z*: [M+Na]<sup>+</sup> Calcd for C<sub>28</sub>H<sub>25</sub>N<sub>3</sub>O<sub>7</sub> 538.1590; Found 538.1588.



**tert-butyl (1*S*,3'*R*)-3''-methyl-4'-((methylperoxy)-1*l*-methyl)-2,5''-dioxo-1''-phenyl-1'',5''-dihydro-1'*H*,2*H*-dispiro[acenaphthylene-1,2'-pyrrole-3',4''-pyrazole]-1'-carboxylate (10).**

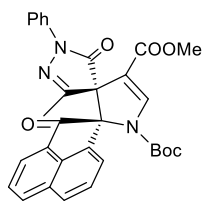

30.0 mg, 56% yield, white solid, mp 81.3 – 82.5 °C; HPLC (Daicel Chiralpak OD-H, n-hexane/2-propanol = 90:10, 1.0 mL/min, at 270 nm):  $t_R = 13.33$  min (minor),  $t_R = 37.79$  min (major); 93% *ee*,  $[\alpha]_D^{20} = -226.7$  ( $c = 0.45$ , MeOH).  $^1\text{H NMR}$  (600 MHz, DMSO- $d_6$ , 60 °C)  $\delta$  8.31 – 8.29 (m, 2H), 8.11 (d,  $J = 6.6$  Hz, 1H), 8.01 (d,  $J = 7.8$  Hz, 1H), 7.84 (t,  $J = 7.8$  Hz, 1H), 7.76 – 7.71 (m, 2H), 7.26 – 7.25 (m, 4H), 7.11 – 7.08 (m, 1H), 3.67 (s, 3H), 2.05 (s, 3H), 0.60 (s, 9H).  $^{13}\text{C NMR}$  (150 MHz, DMSO- $d_6$ , 60 °C)  $\delta$  196.8, 169.9, 163.2, 161.2, 156.9, 149.4, 147.4, 141.3, 137.2, 135.9, 133.7, 133.1, 130.5, 129.8, 129.31, 129.29, 128.9, 128.1, 126.9, 125.9, 123.5, 122.9, 119.5, 119.1, 107.9, 84.0, 78.3, 52.3, 27.2, 17.0. HRMS (ESI-TOF)  $m/z$ :  $[\text{M}+\text{Na}]^+$  Calcd for  $\text{C}_{31}\text{H}_{27}\text{N}_3\text{O}_6$  560.1792; Found 560.1786.

## 8. Single crystal X-ray diffraction analysis and crystal data

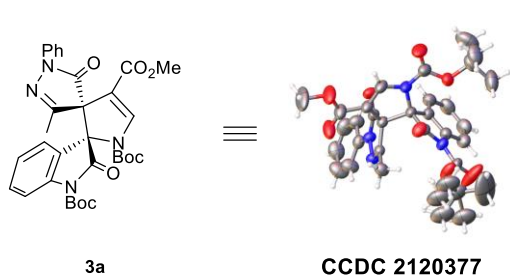

To a 5 mL tube containing **3a** (20 mg) was added a 1:3 mixture of ethyl acetate and petroleum ether (2 mL). A clear solution was obtained through ultrasound treatment and was kept at room temperature for 1 day to get crystals of **3a**, which were characterized by single crystal X-ray diffraction. The data were collected by an Agilent Gemini. **3a** contains the supplementary crystallographic data for this paper. These data can be obtained free of charge via [www.ccdc.cam.ac.uk/data\\_request/cif](http://www.ccdc.cam.ac.uk/data_request/cif)

The ellipsoid contour percent probability level is 50%.

|                                    |                                                               |
|------------------------------------|---------------------------------------------------------------|
| Empirical formula                  | C <sub>32</sub> H <sub>34</sub> N <sub>4</sub> O <sub>8</sub> |
| Formula weight                     | 602.63                                                        |
| Temperature/K                      | 293.15                                                        |
| Crystal system                     | orthorhombic                                                  |
| Space group                        | P2 <sub>1</sub> 2 <sub>1</sub> 2 <sub>1</sub>                 |
| a/Å                                | 9.4403(9)                                                     |
| b/Å                                | 12.4980(11)                                                   |
| c/Å                                | 27.612(2)                                                     |
| α/°                                | 90                                                            |
| β/°                                | 90                                                            |
| γ/°                                | 90                                                            |
| Volume/Å <sup>3</sup>              | 3257.8(5)                                                     |
| Z                                  | 4                                                             |
| ρ <sub>calc</sub> /cm <sup>3</sup> | 1.229                                                         |

|                                                |                                                               |
|------------------------------------------------|---------------------------------------------------------------|
| $\mu/\text{mm}^{-1}$                           | 0.089                                                         |
| F(000)                                         | 1272.0                                                        |
| Crystal size/ $\text{mm}^3$                    | $0.35 \times 0.3 \times 0.25$                                 |
| Radiation                                      | MoK $\alpha$ ( $\lambda = 0.71073$ )                          |
| $2\Theta$ range for data collection/ $^\circ$  | 6.162 to 52.744                                               |
| Index ranges                                   | $-11 \leq h \leq 11, -15 \leq k \leq 15, -34 \leq l \leq 34$  |
| Reflections collected                          | 18292                                                         |
| Independent reflections                        | 6617 [ $R_{\text{int}} = 0.0282, R_{\text{sigma}} = 0.0506$ ] |
| Data/restraints/parameters                     | 6617/2/408                                                    |
| Goodness-of-fit on $F^2$                       | 1.011                                                         |
| Final R indexes [ $I \geq 2\sigma(I)$ ]        | $R_1 = 0.0596, wR_2 = 0.1224$                                 |
| Final R indexes [all data]                     | $R_1 = 0.0953, wR_2 = 0.1381$                                 |
| Largest diff. peak/hole / $e \text{ \AA}^{-3}$ | 0.33/-0.26                                                    |
| Flack parameter                                | -0.1(5)                                                       |

## 9. NMR spectra and HPLC chromatograms

### 9.1 NMR spectra of substrates and catalysts

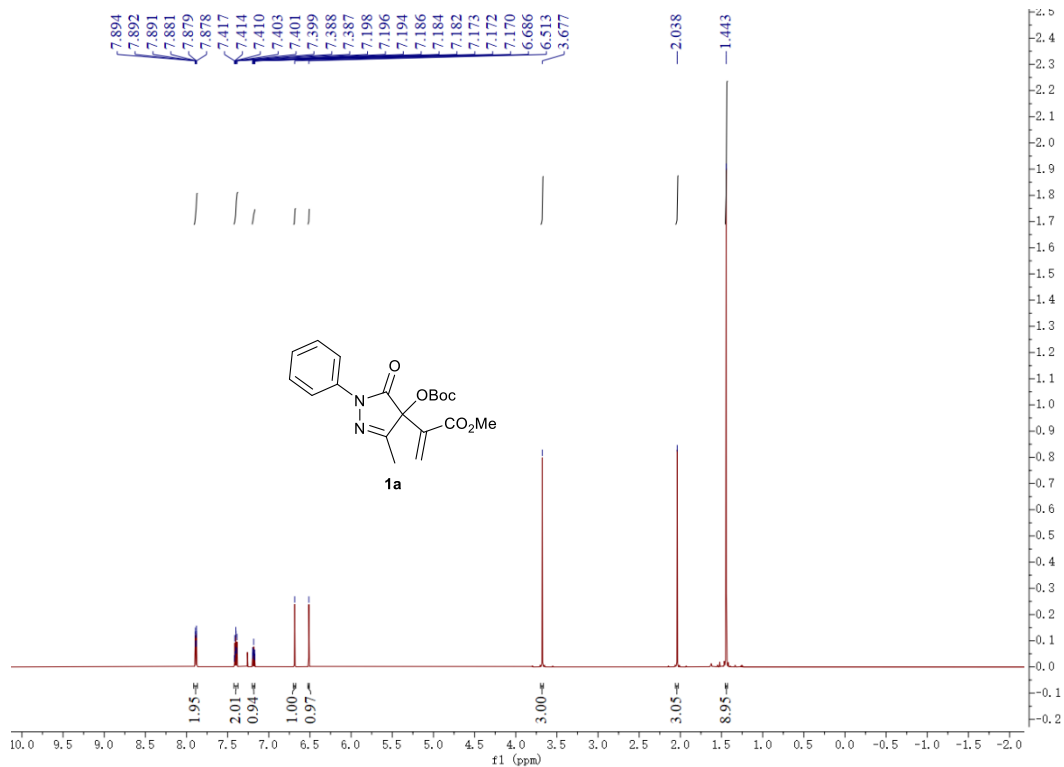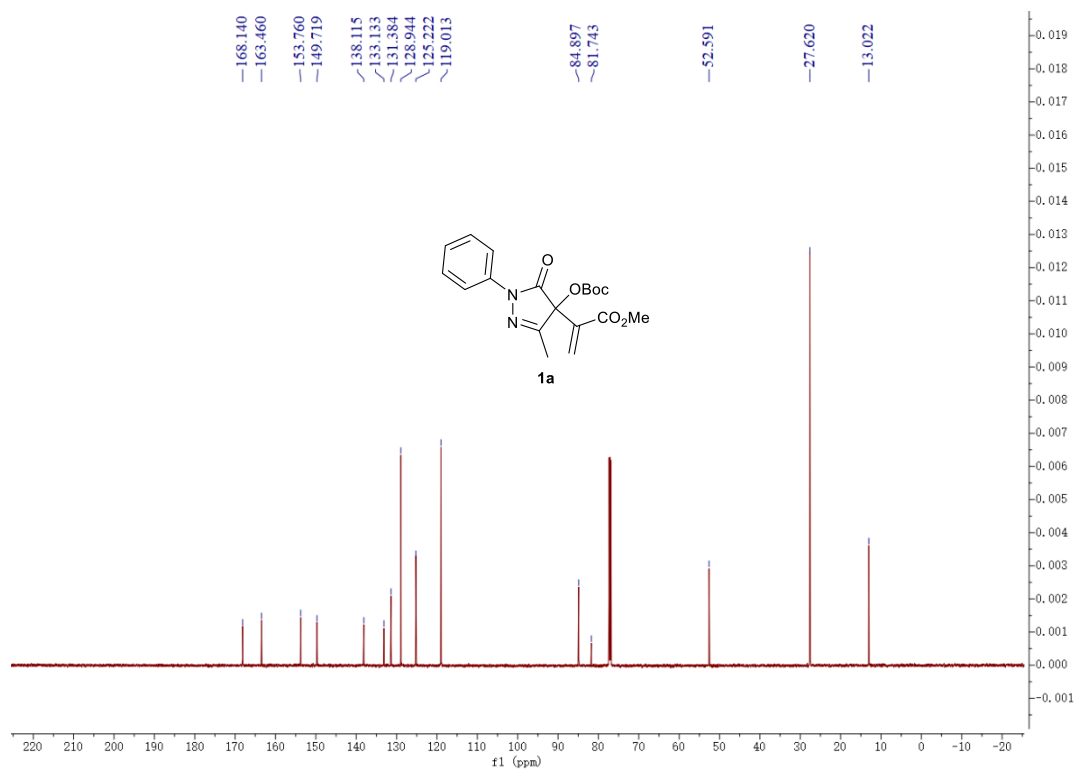

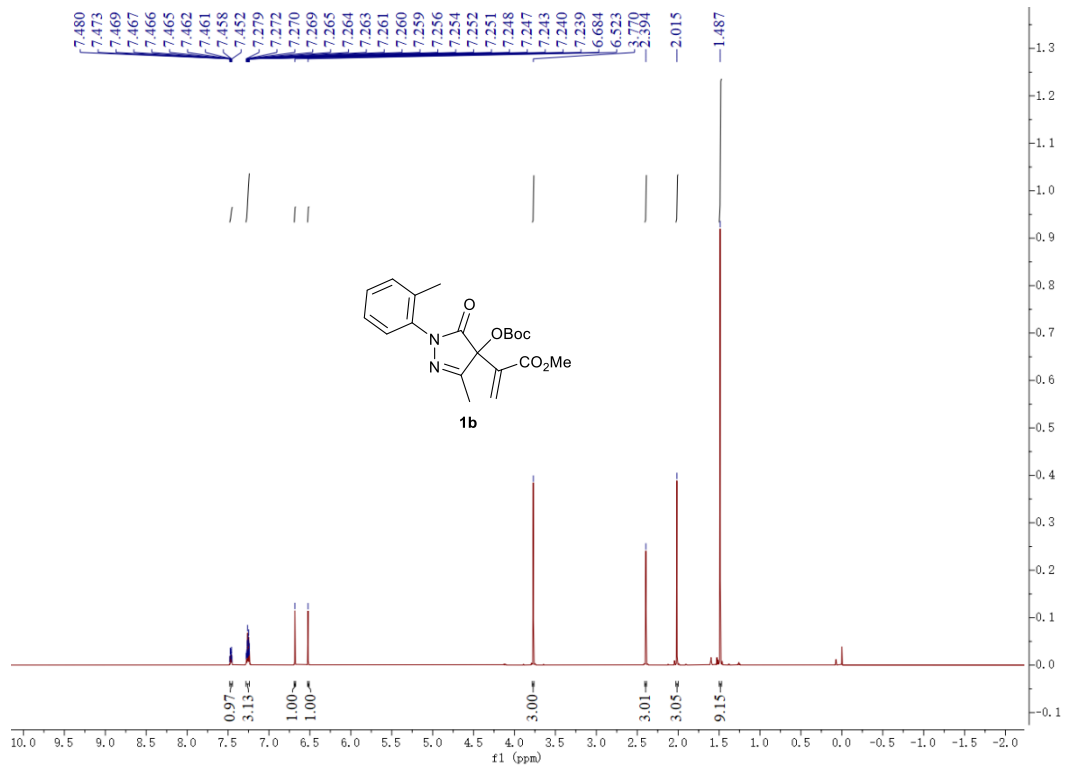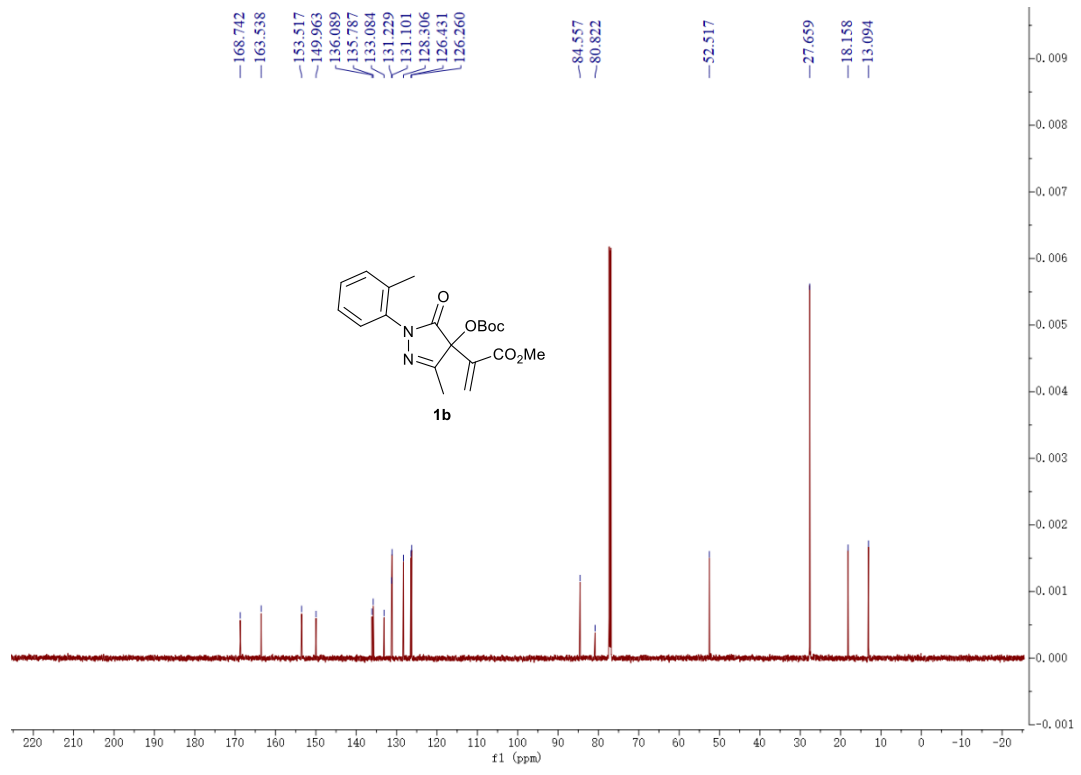

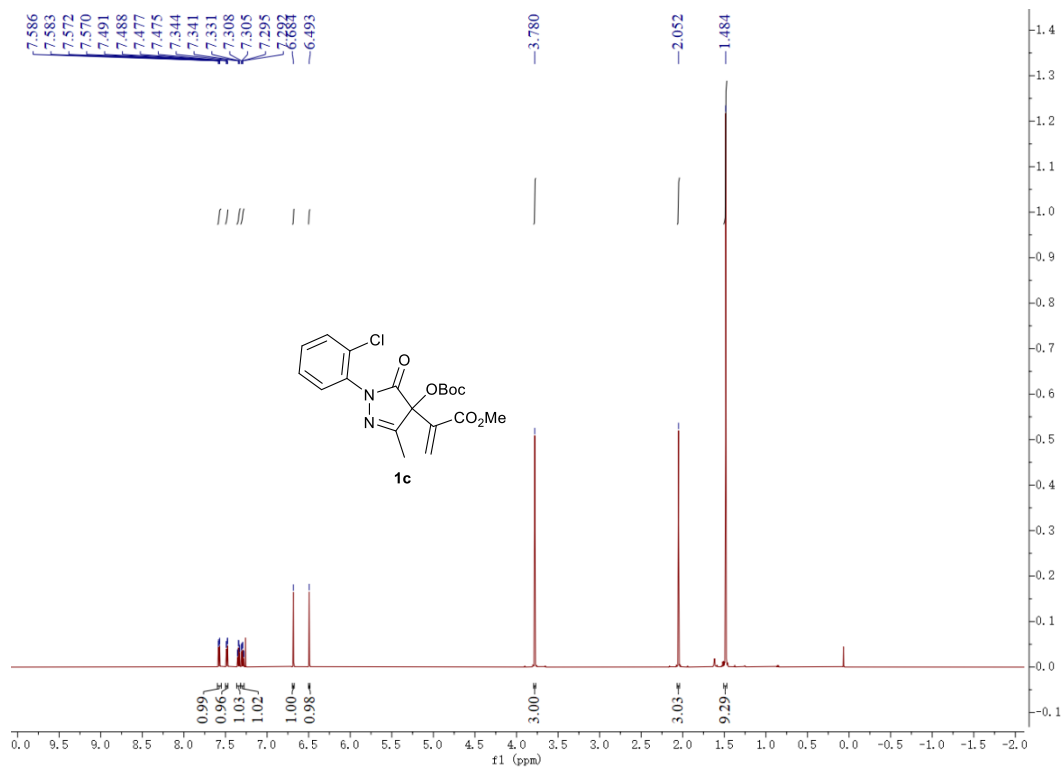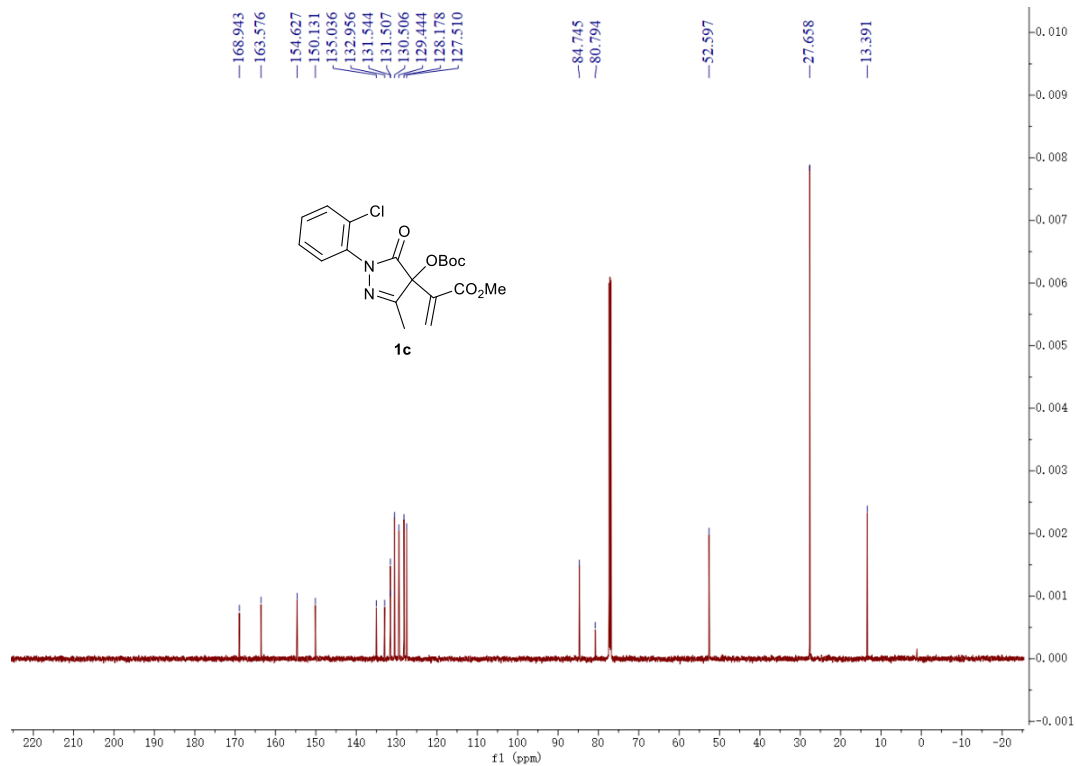

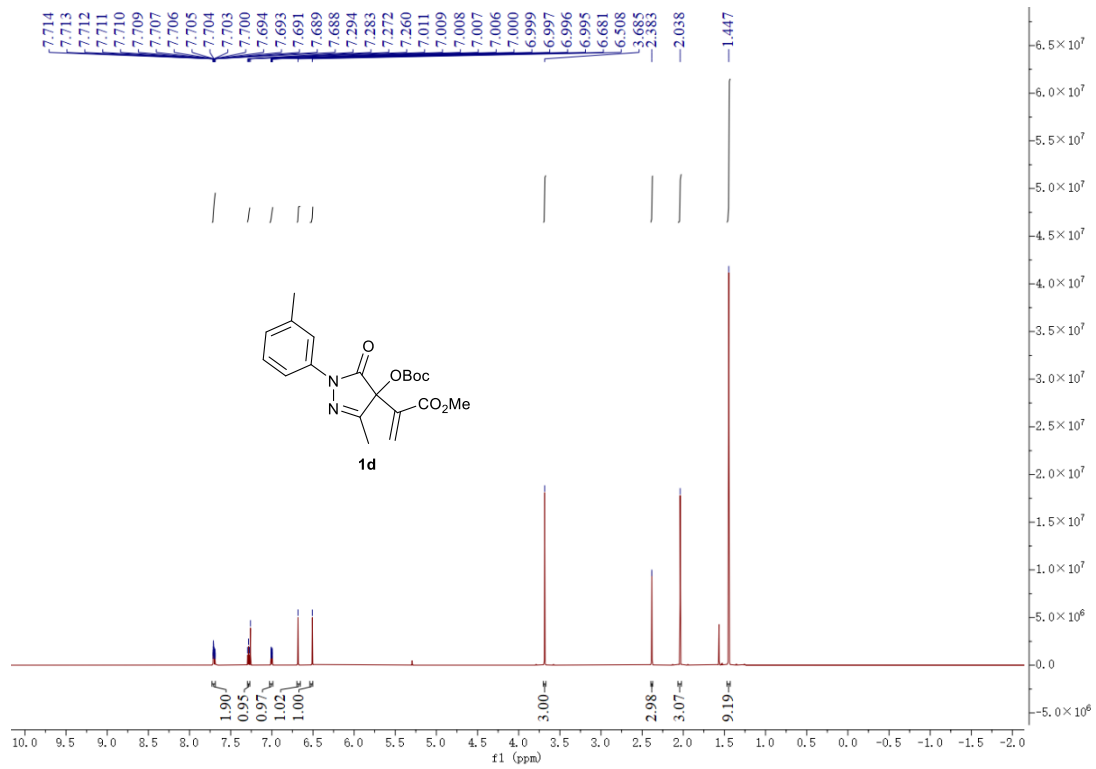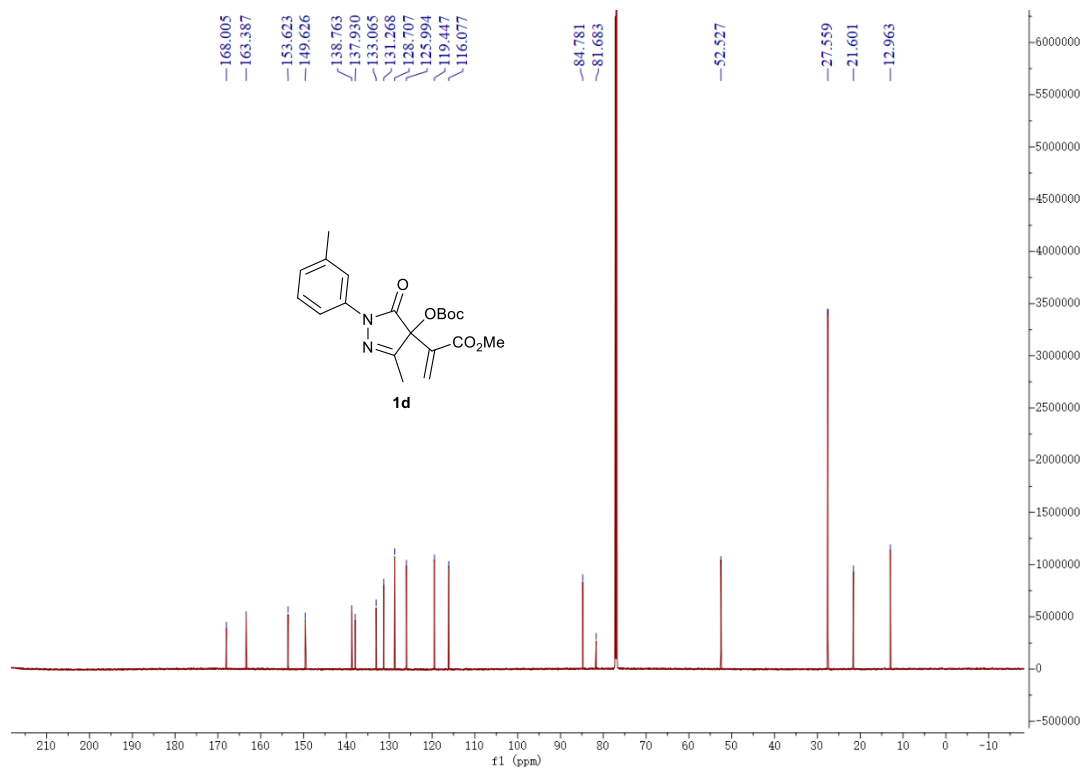

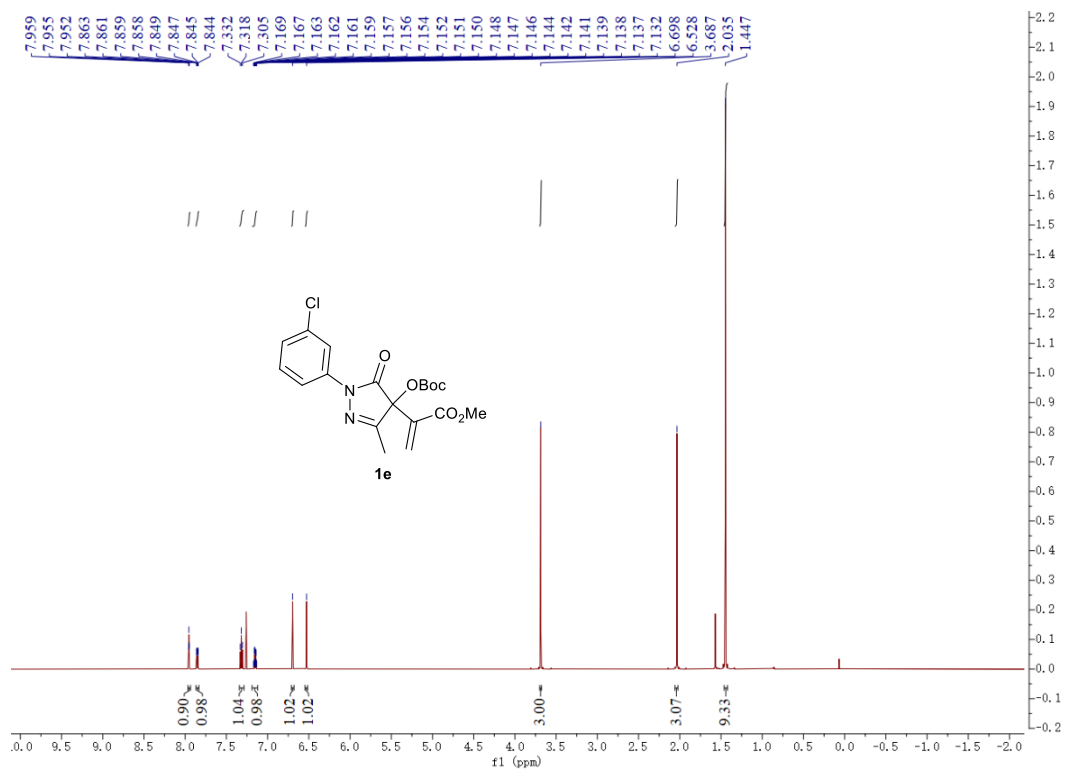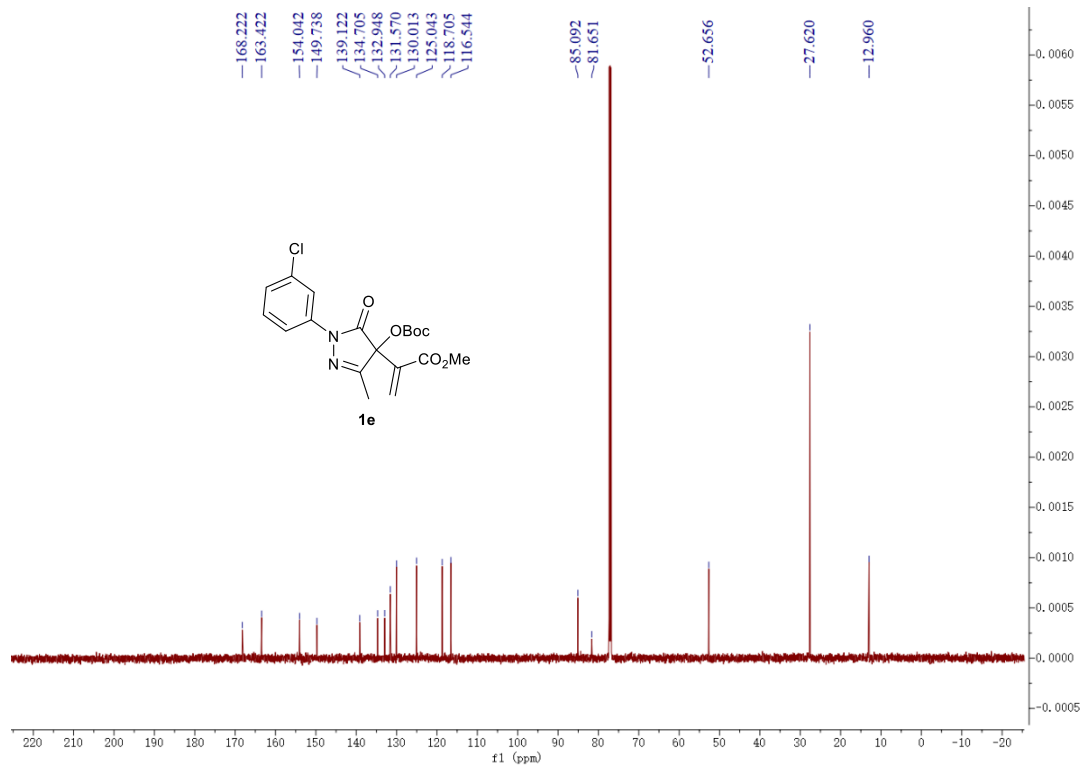



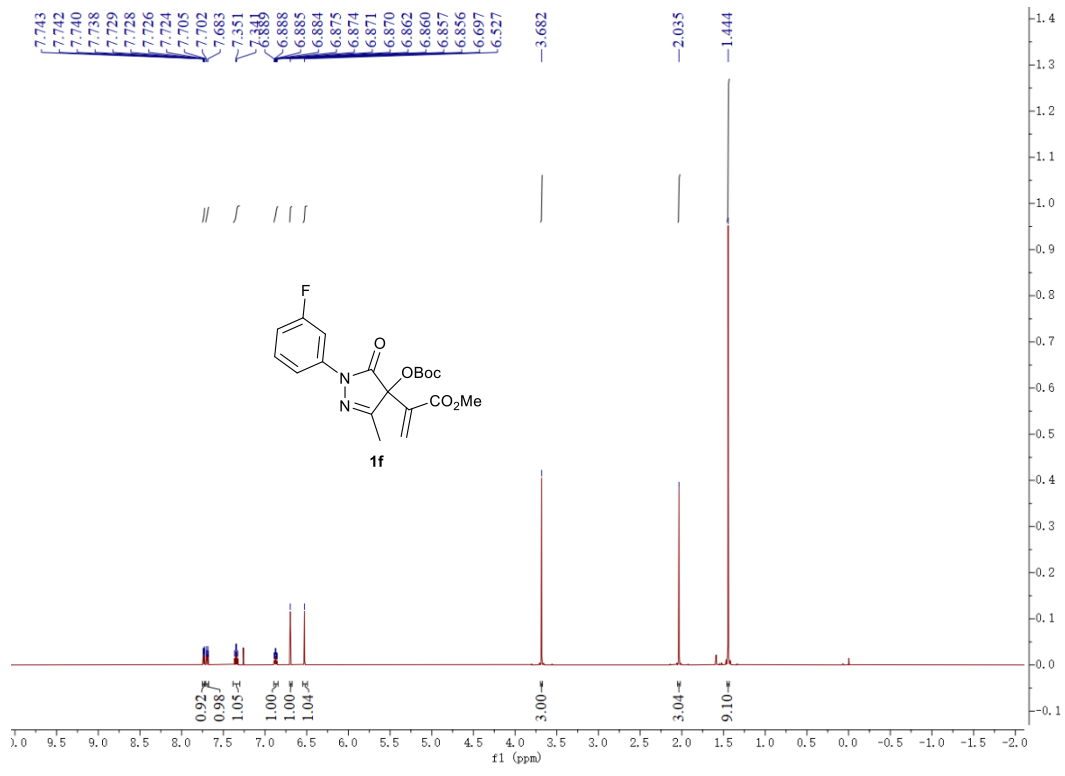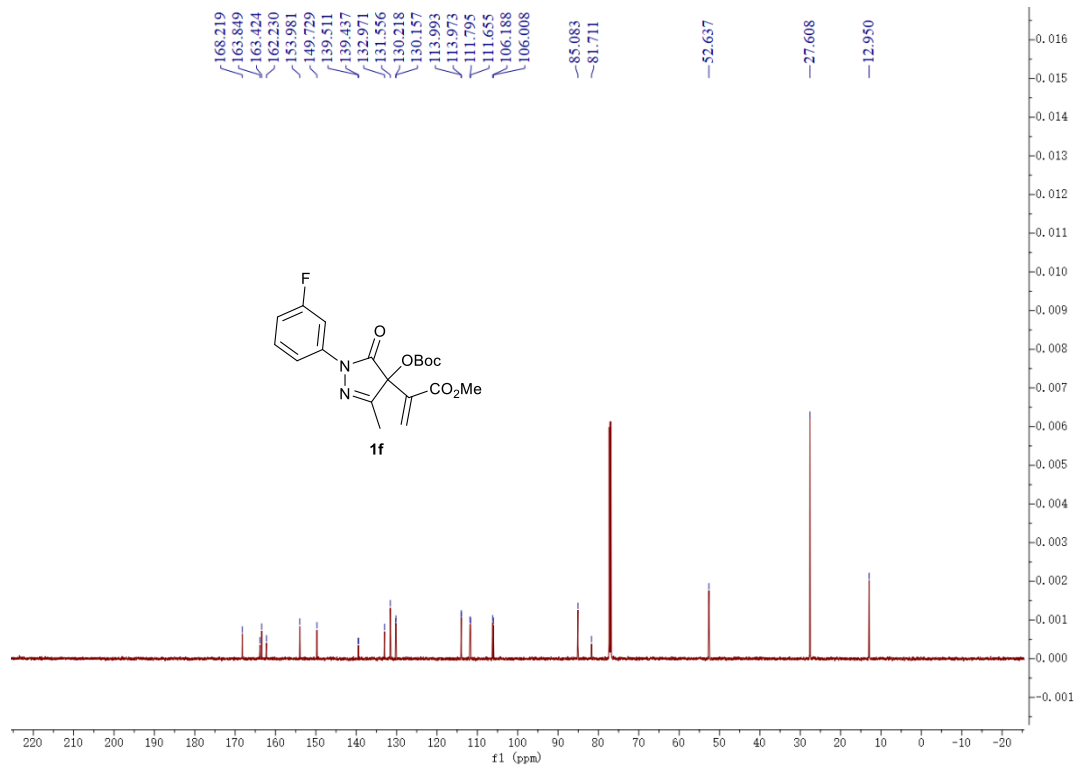

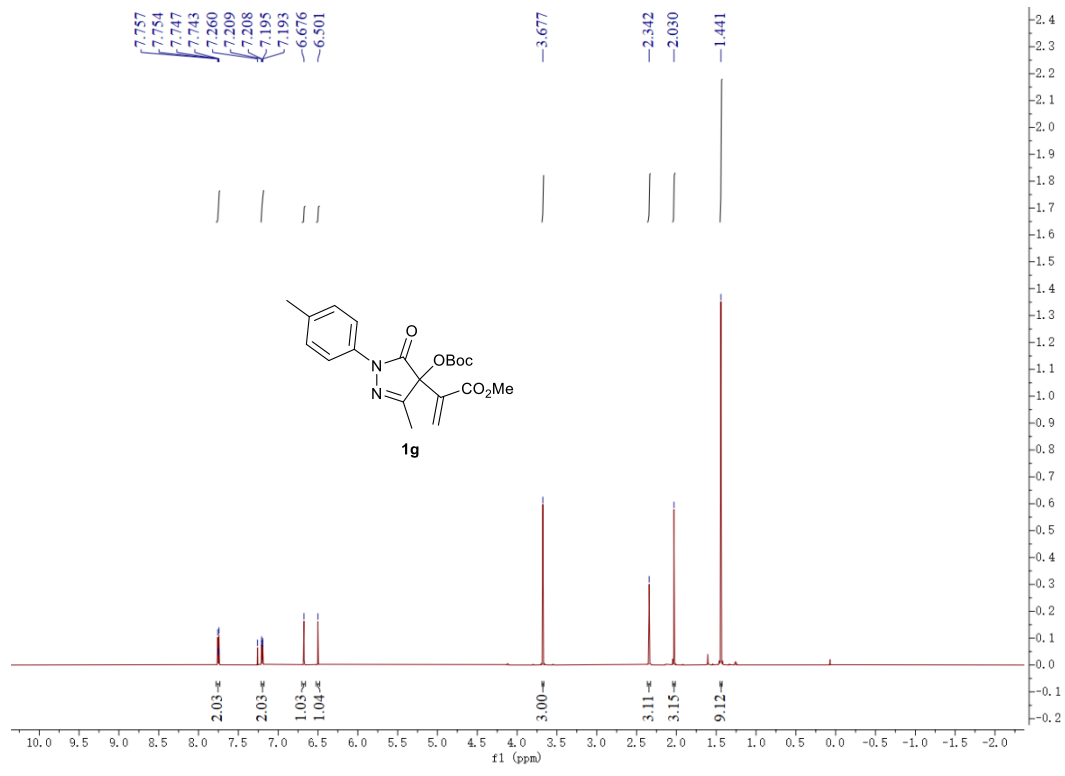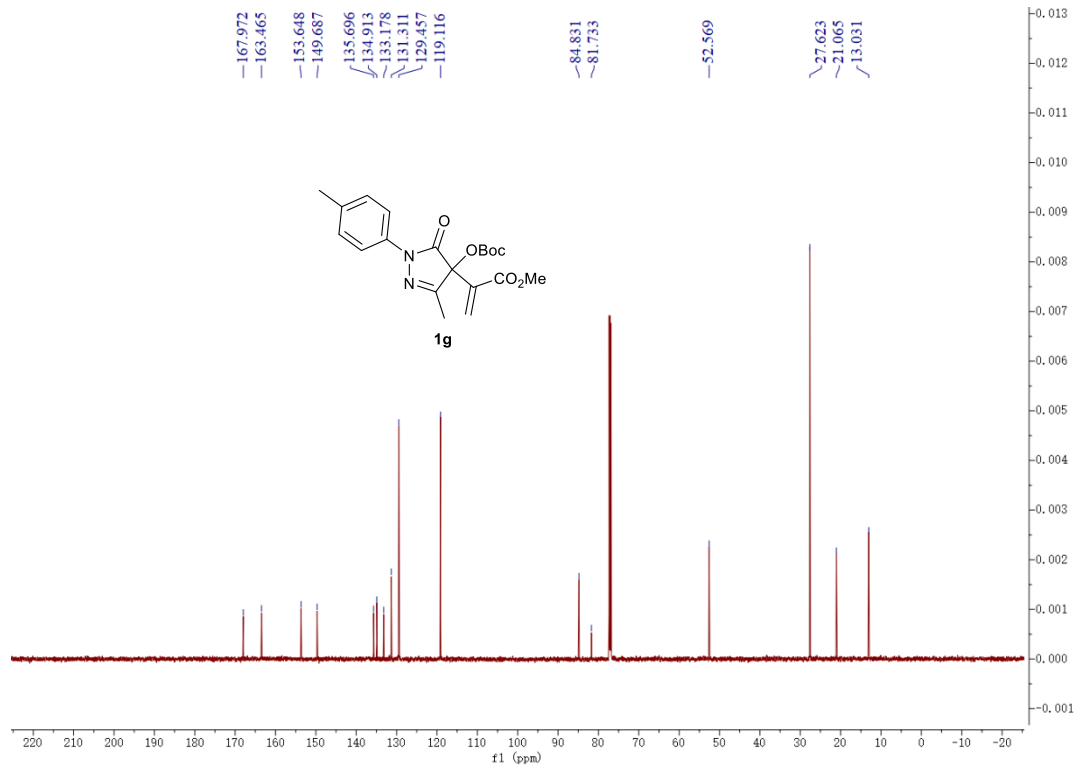

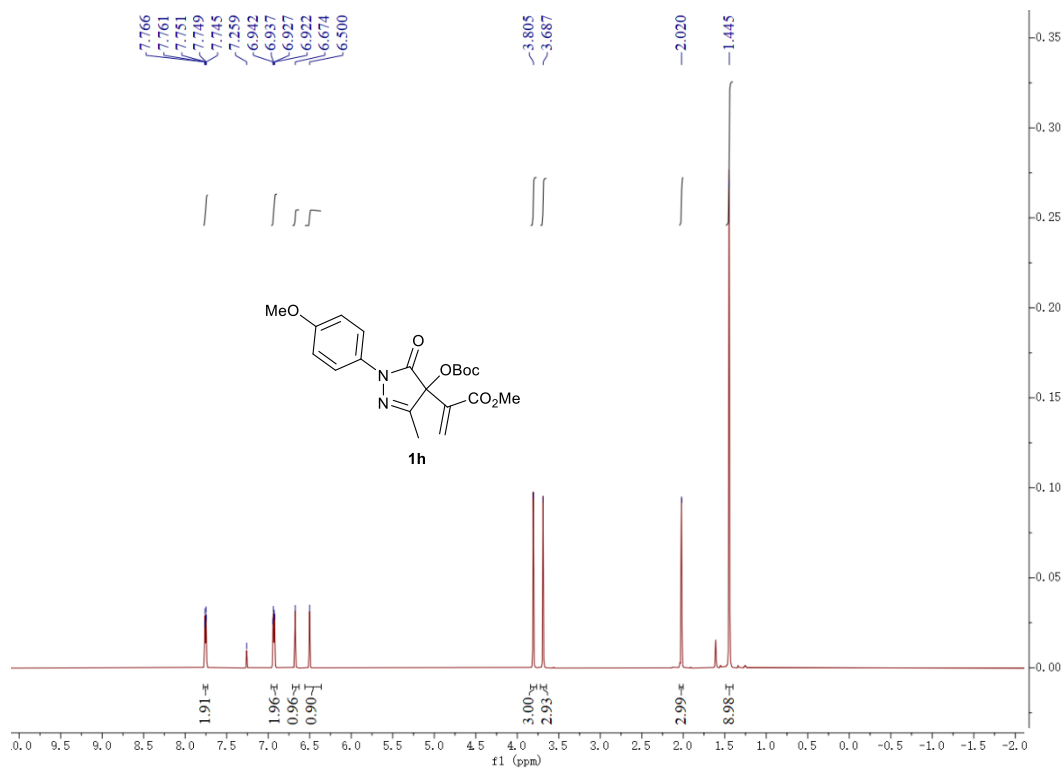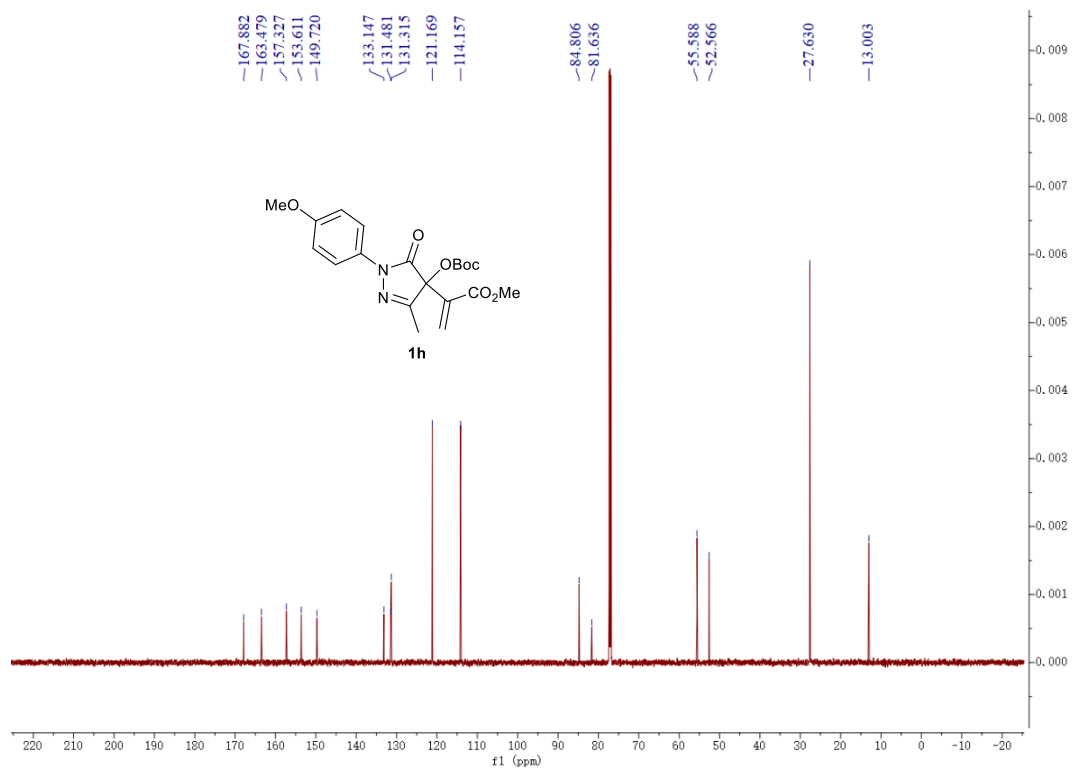

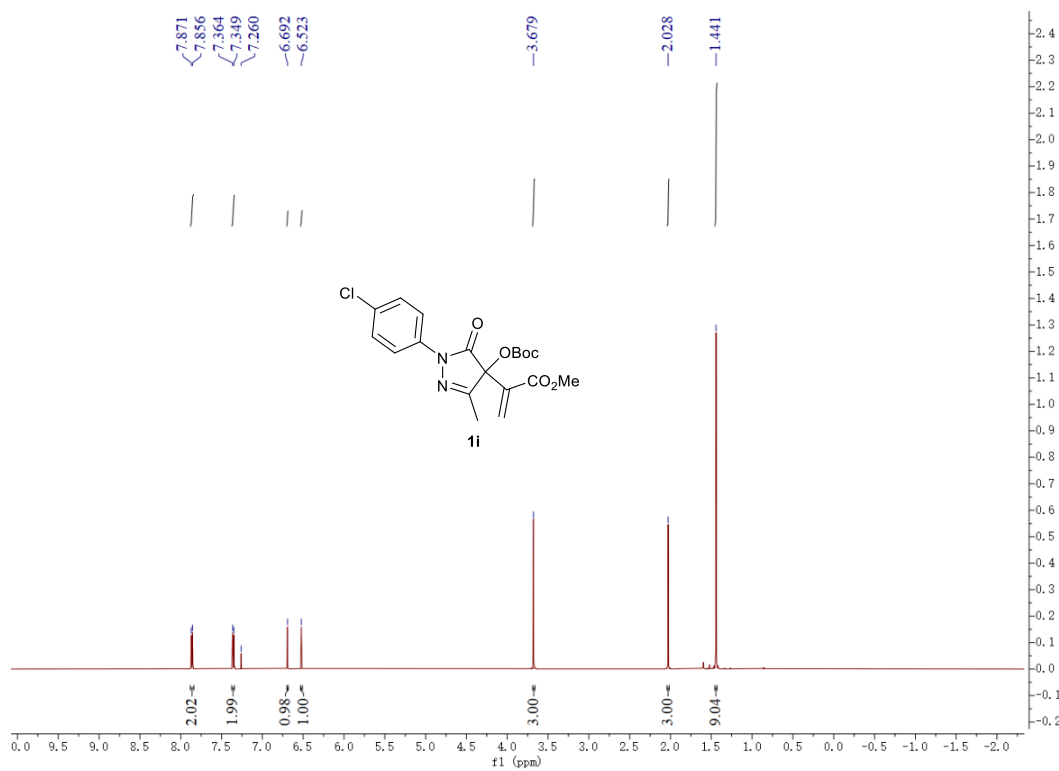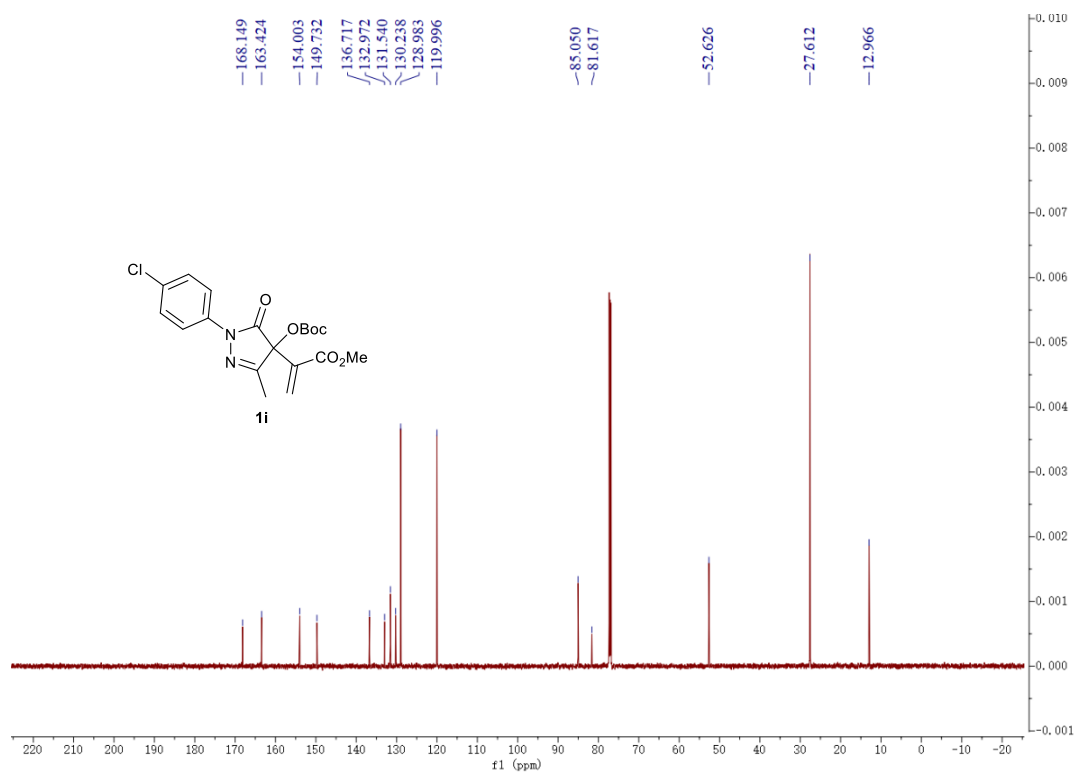

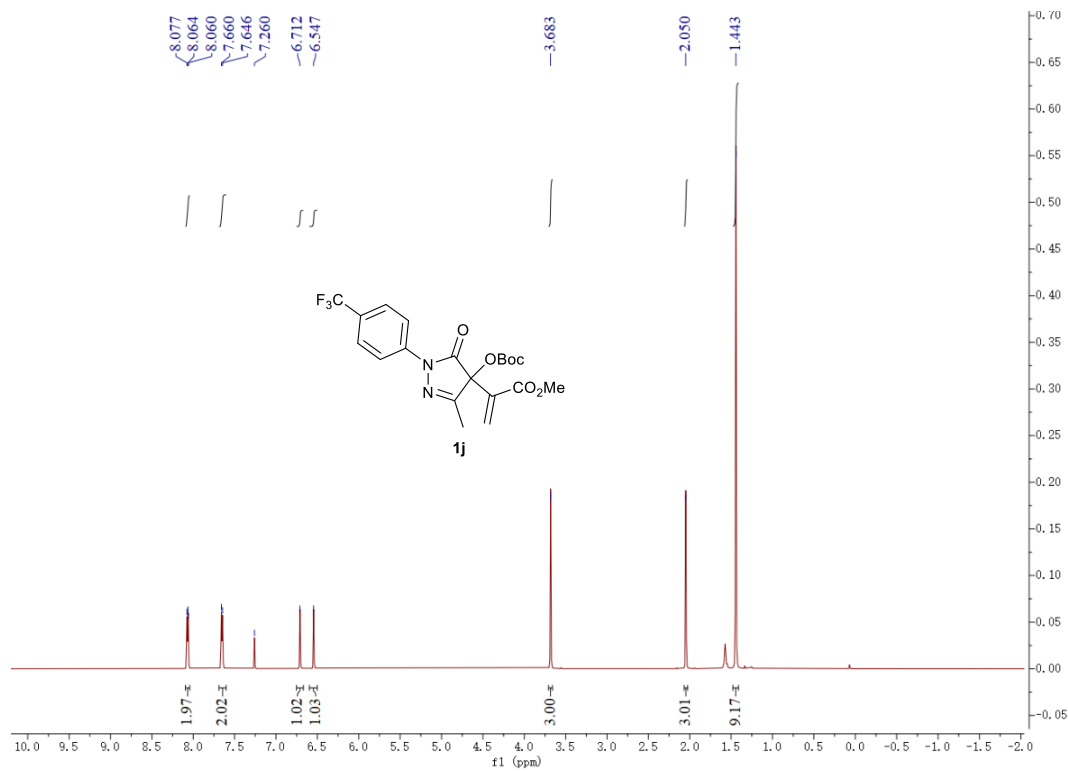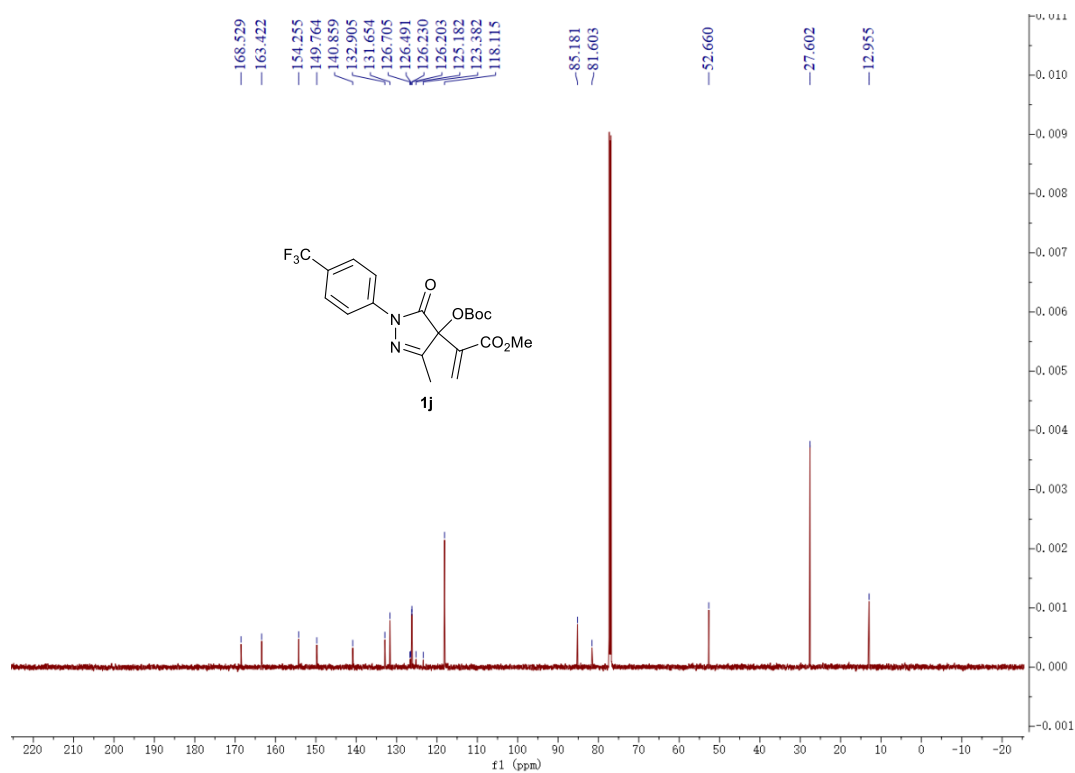

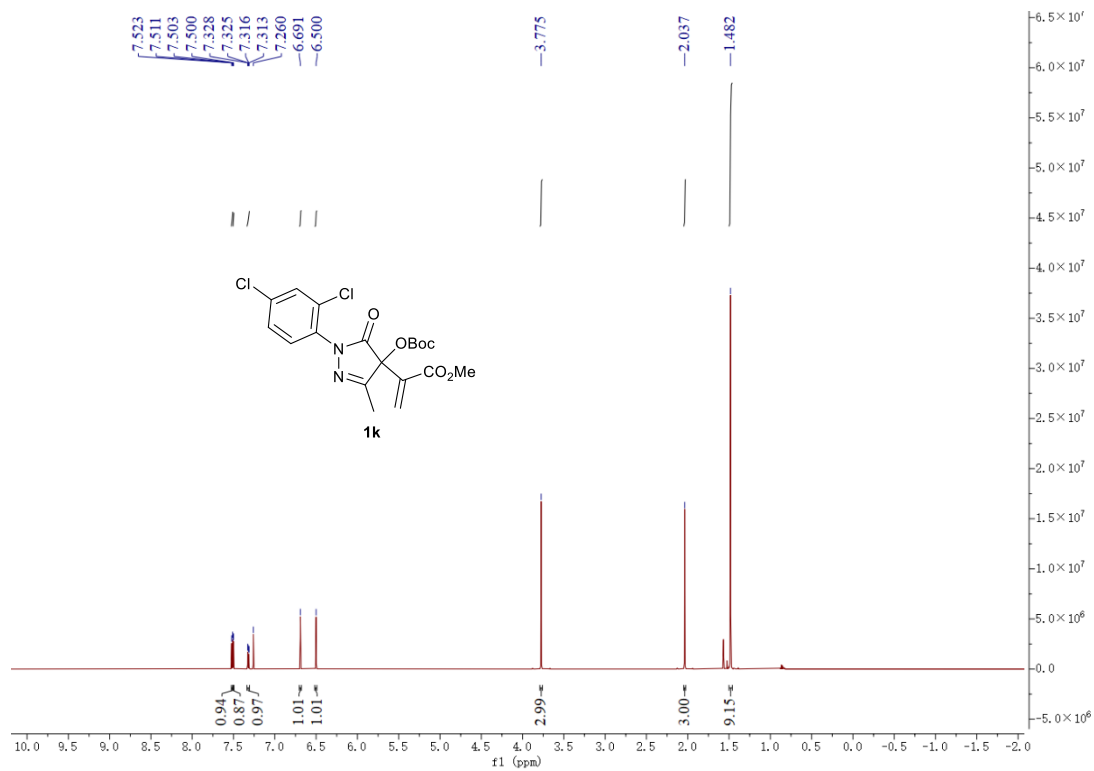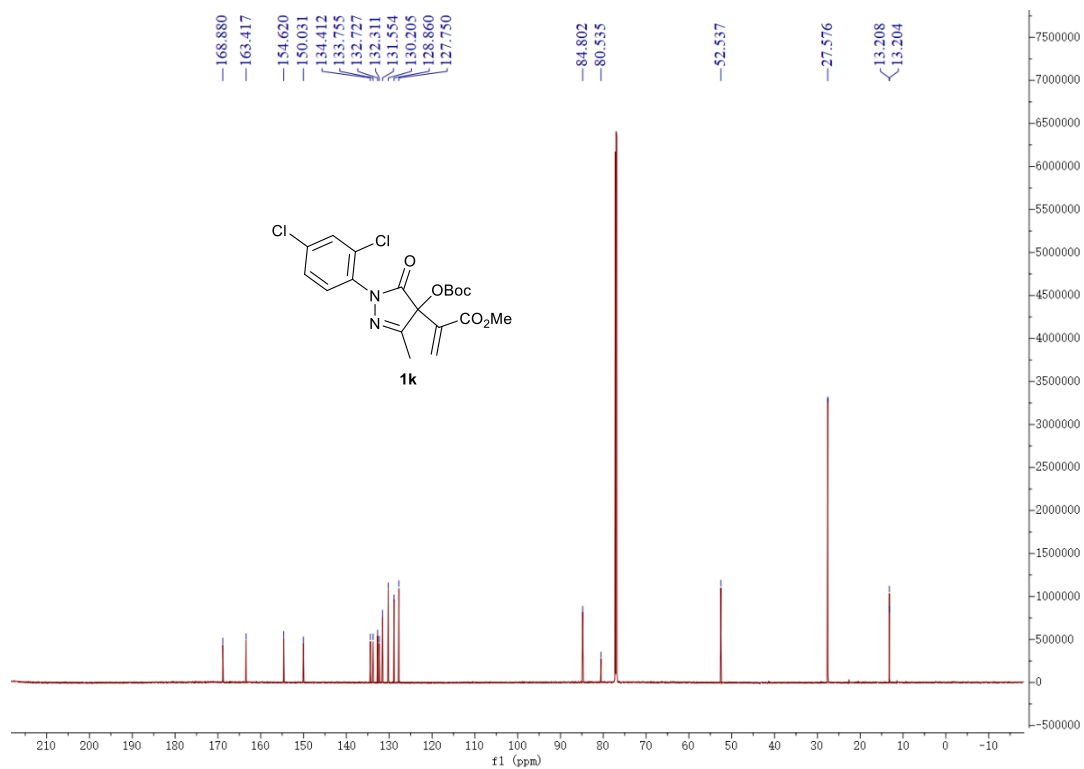

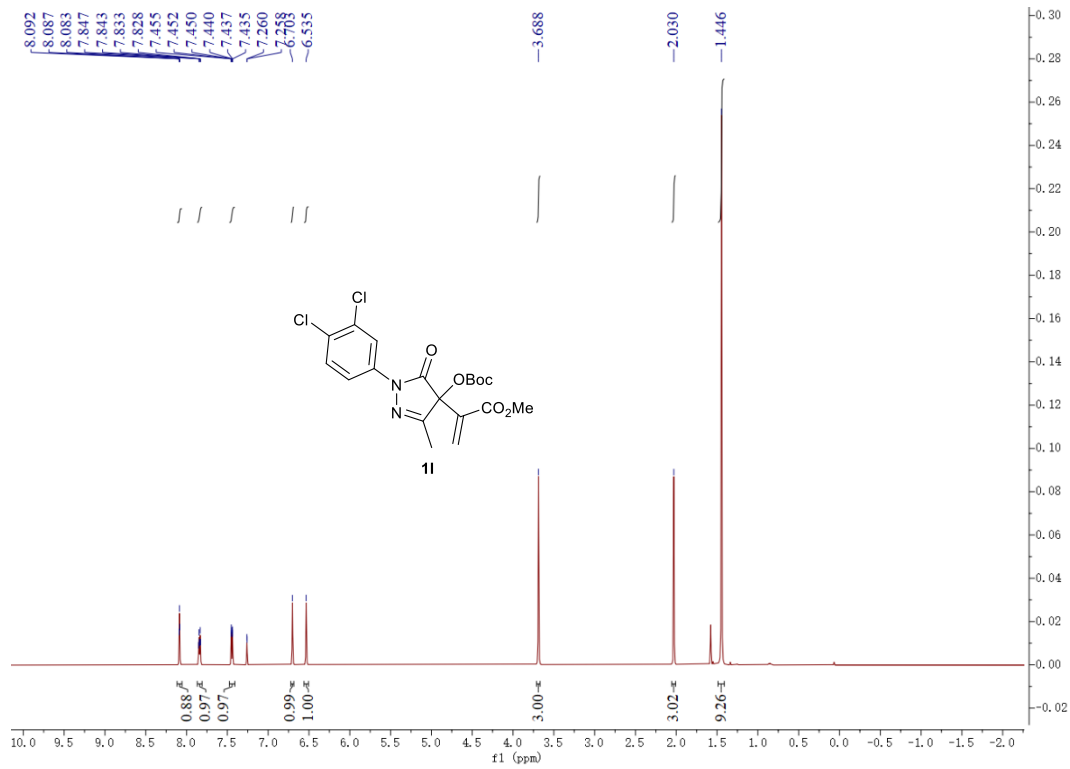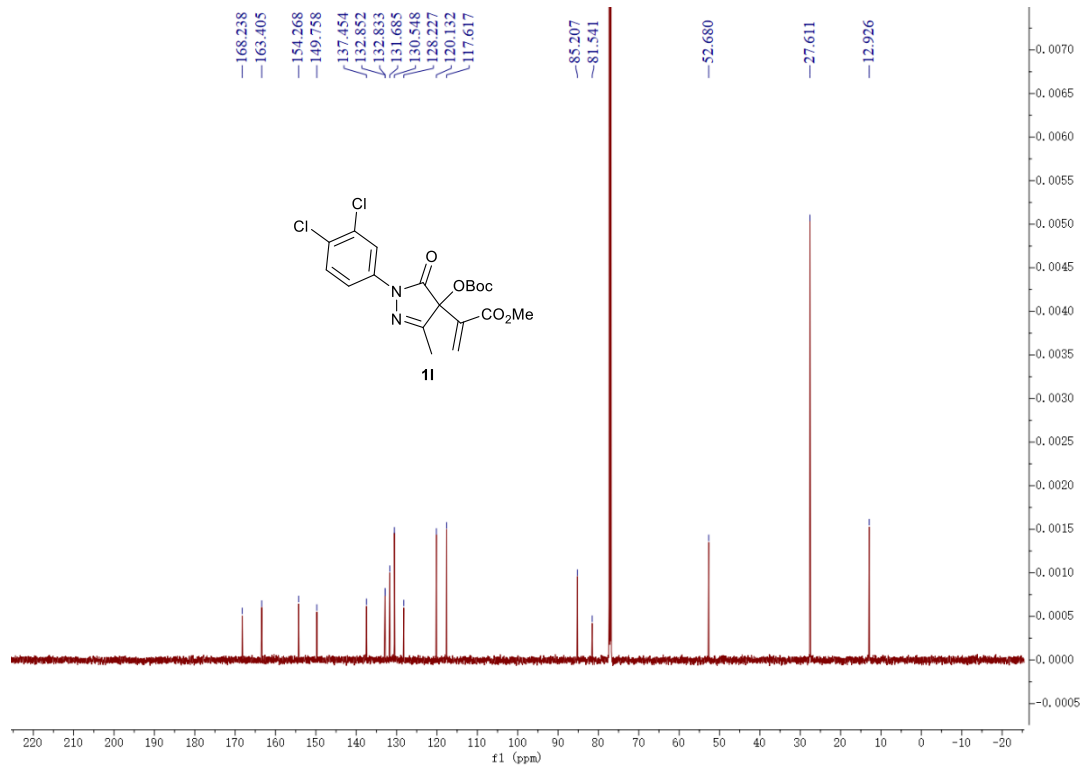

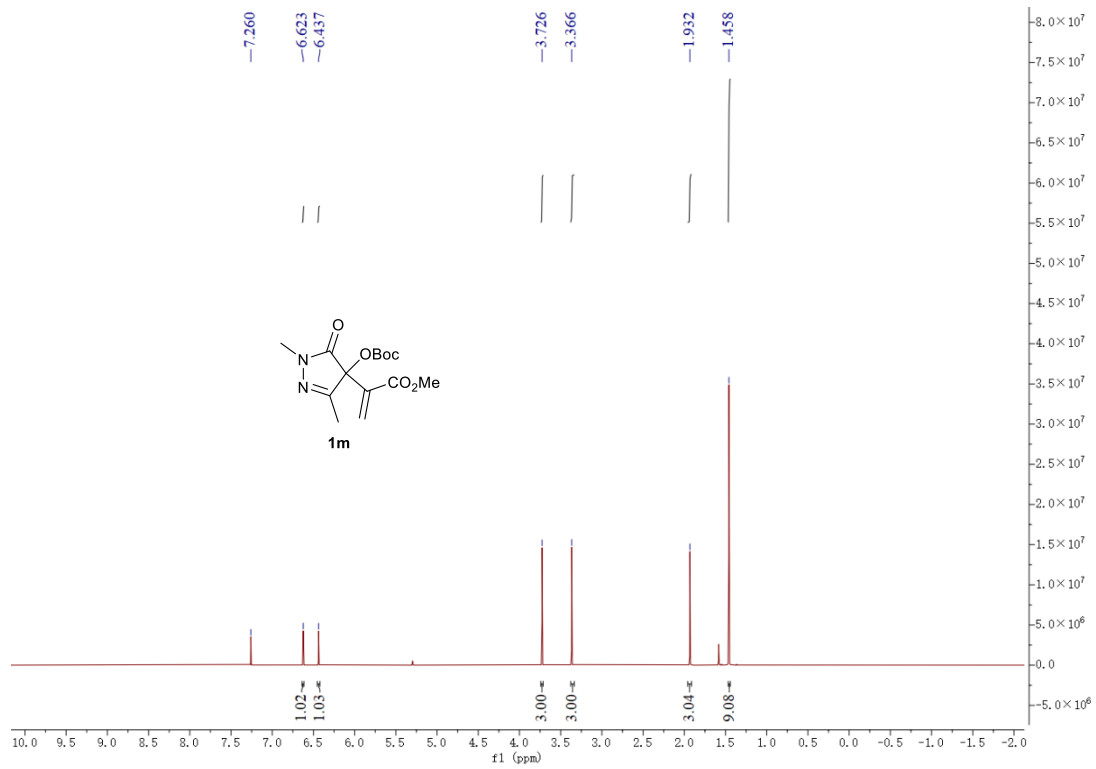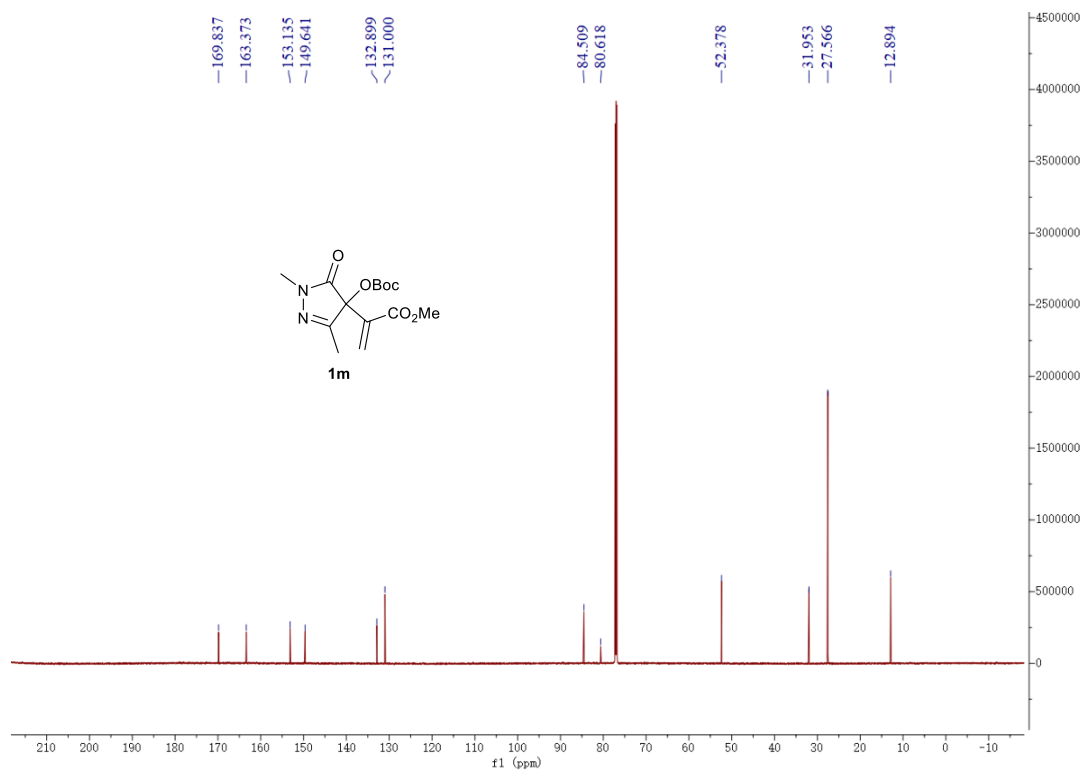



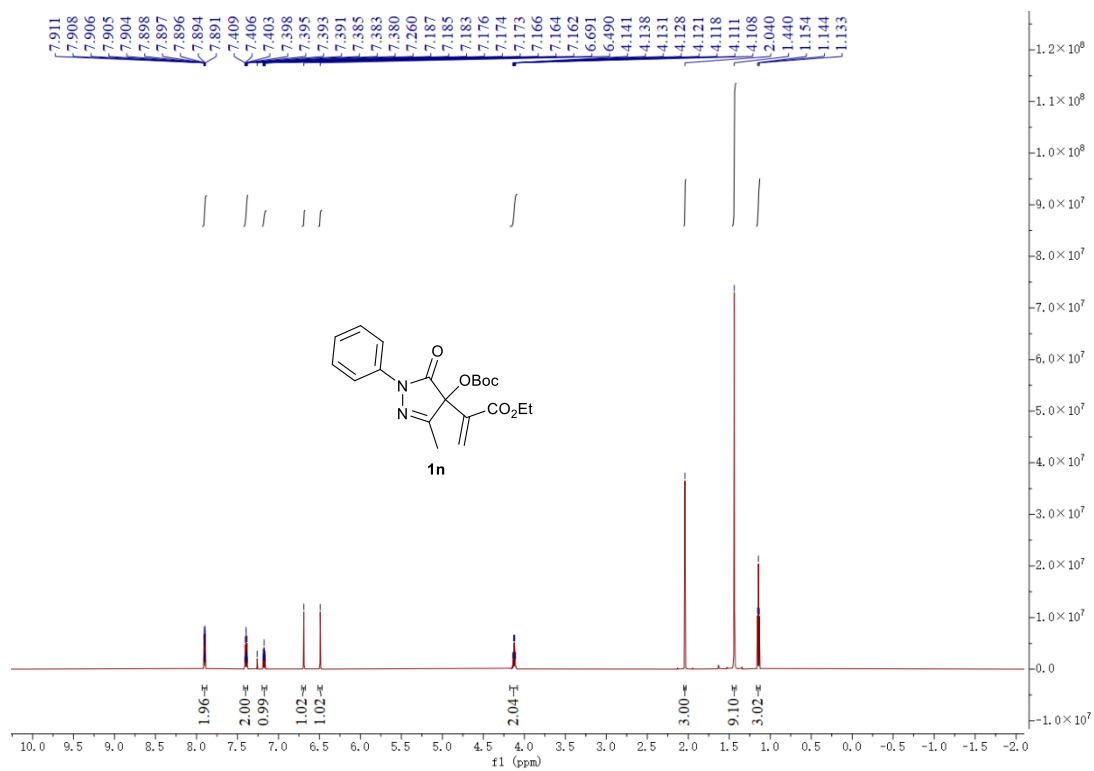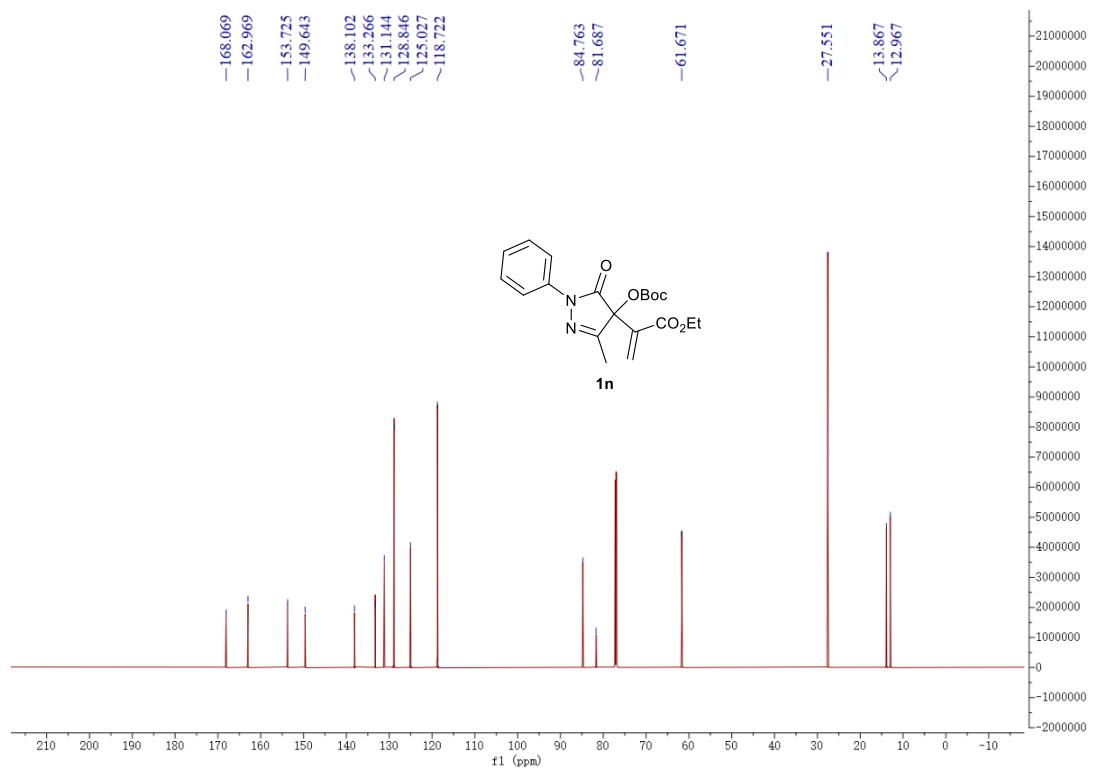

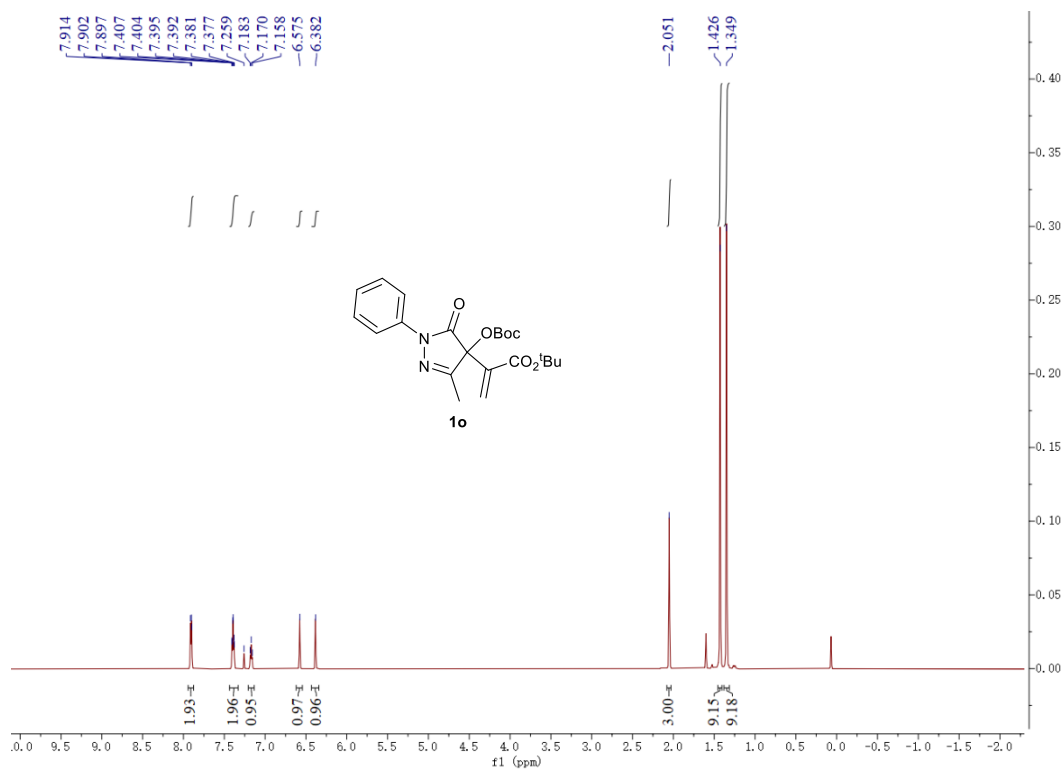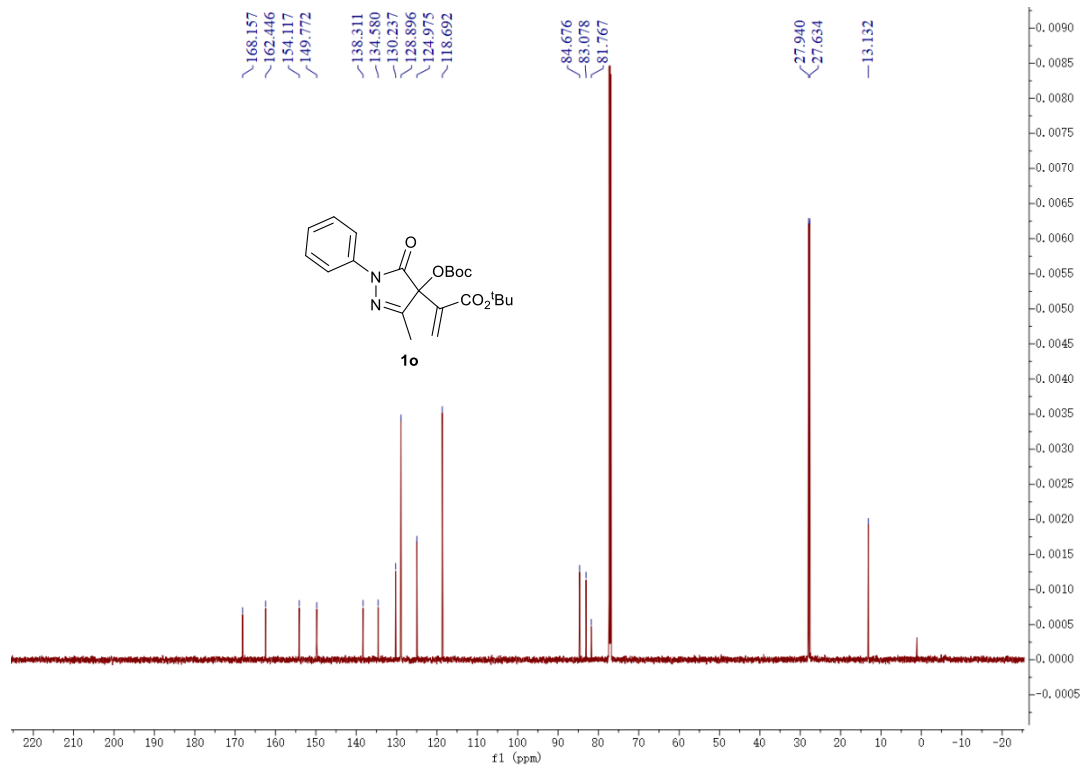

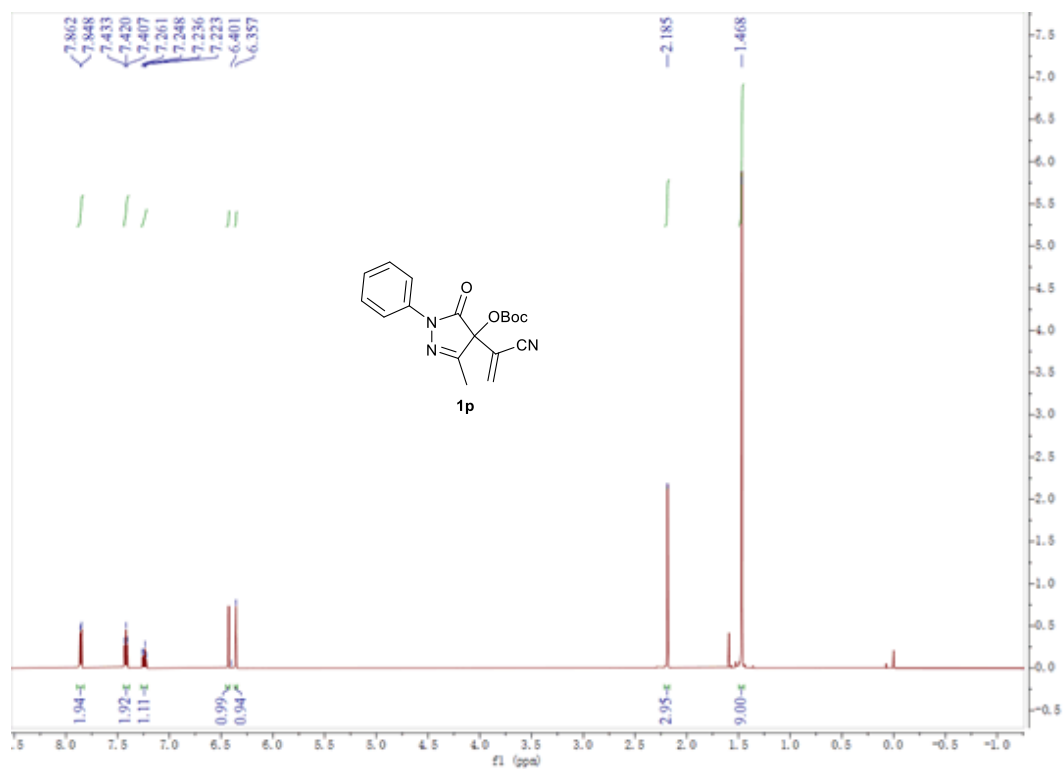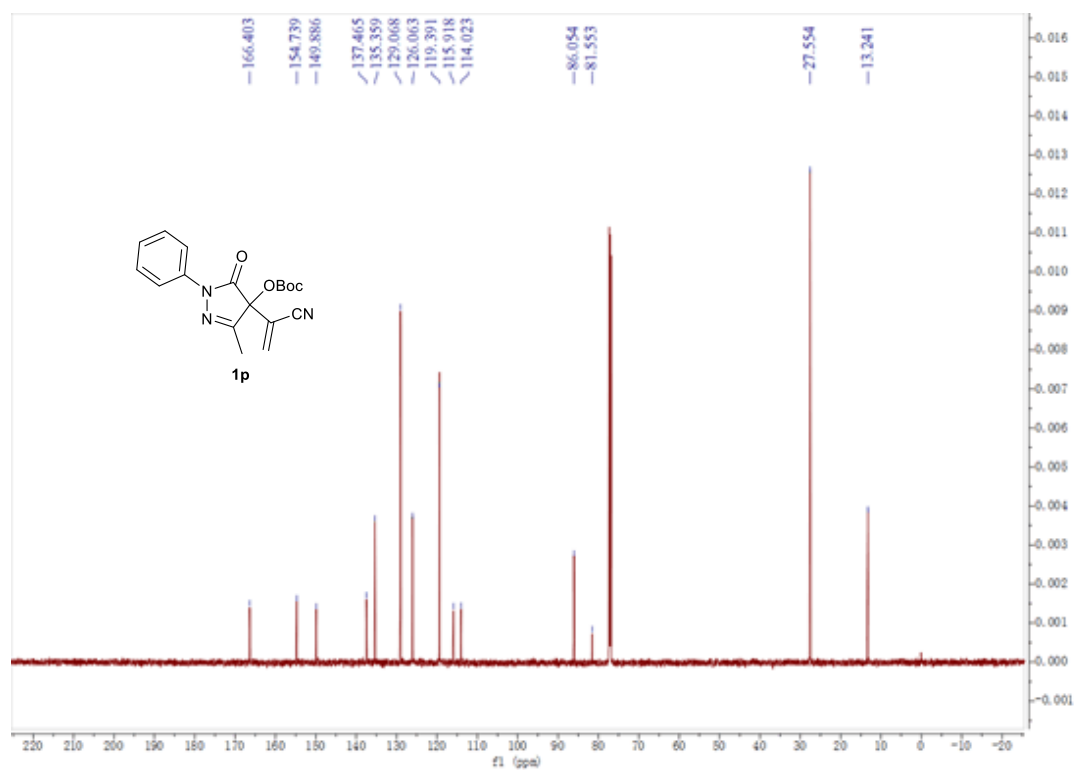



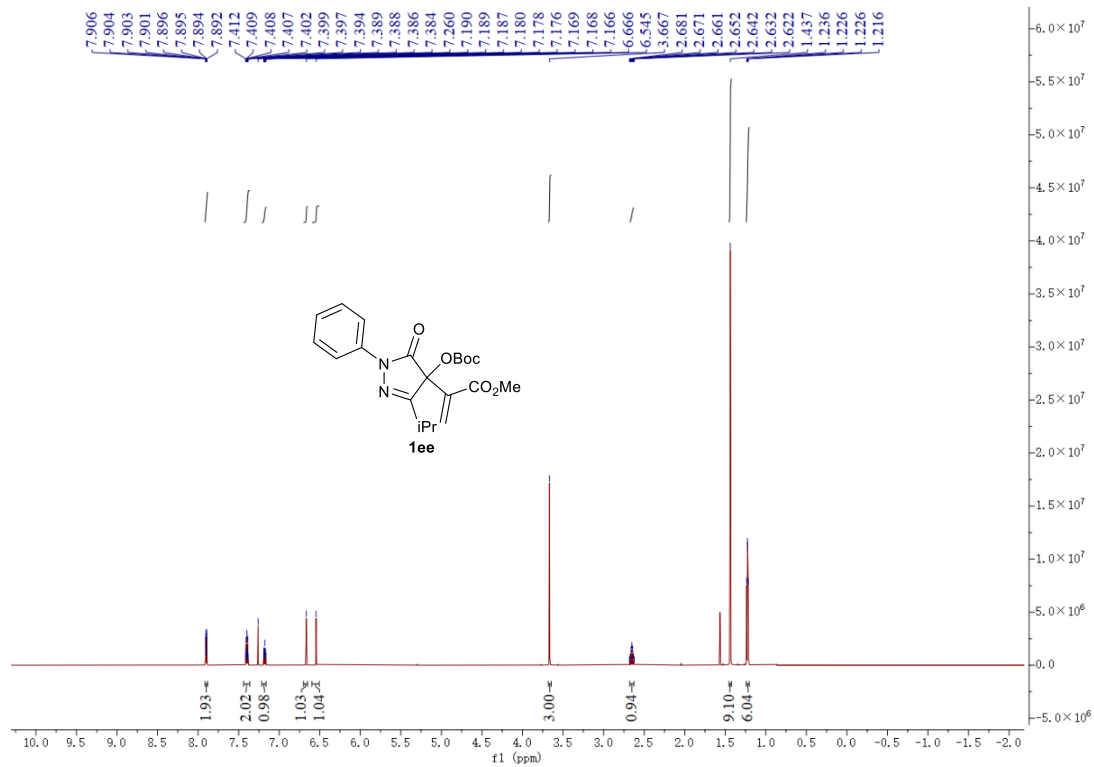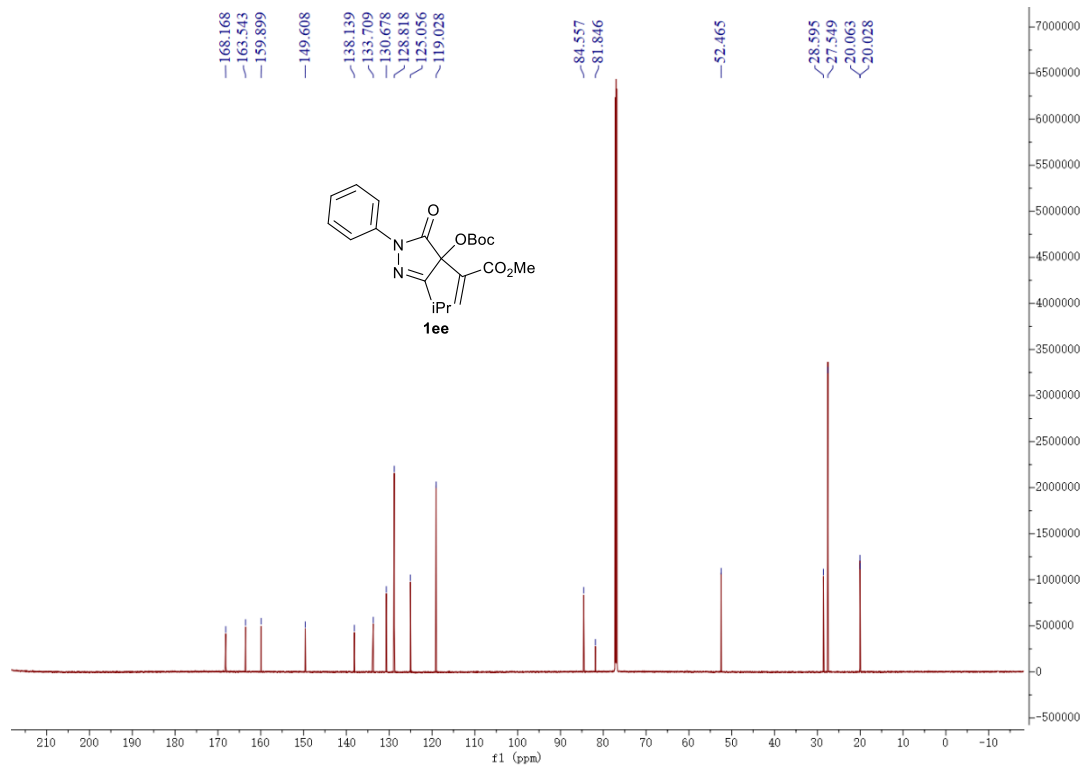

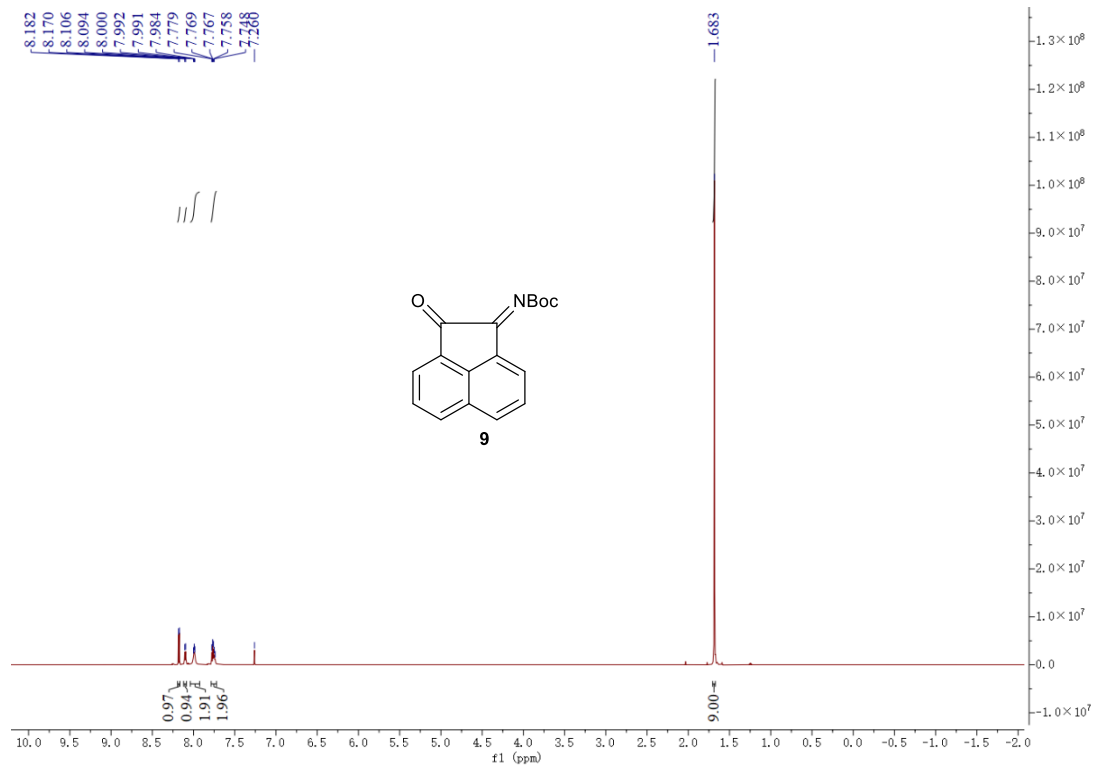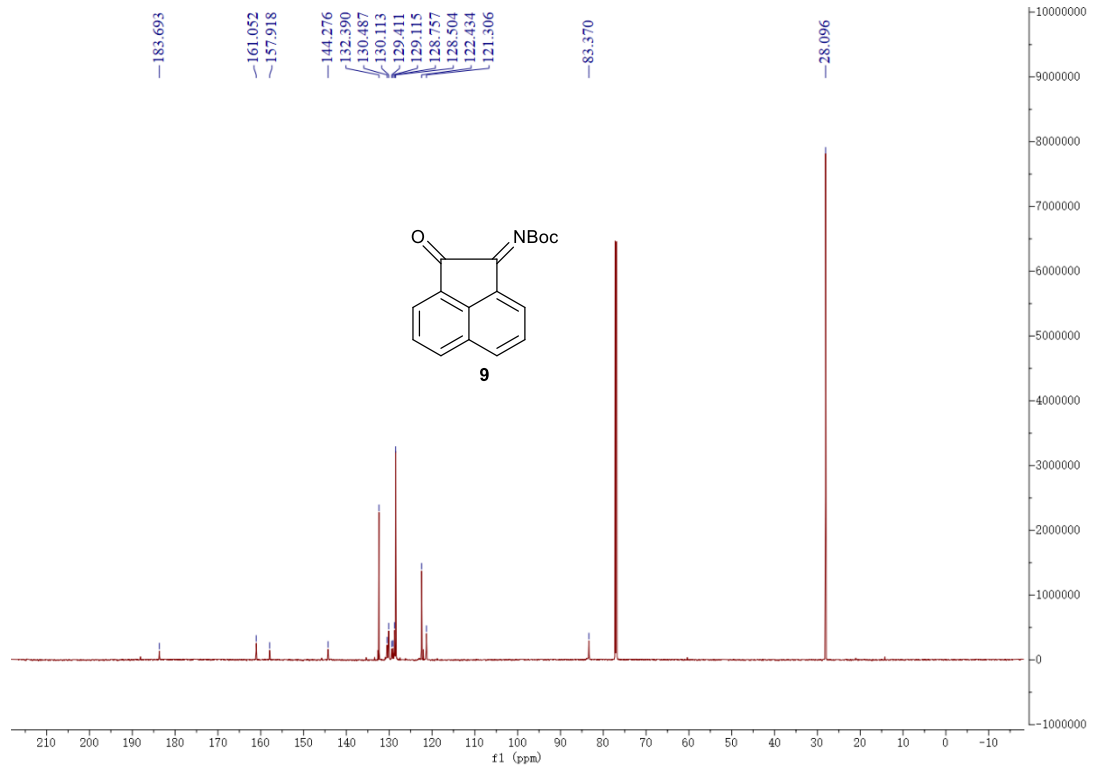

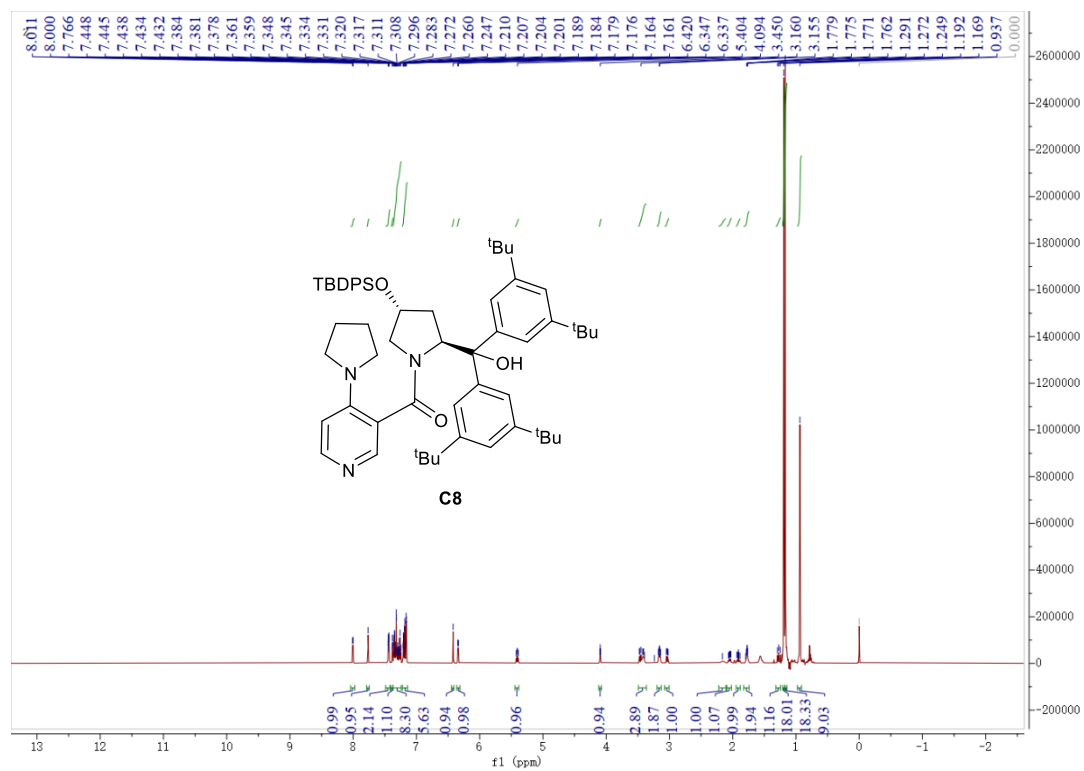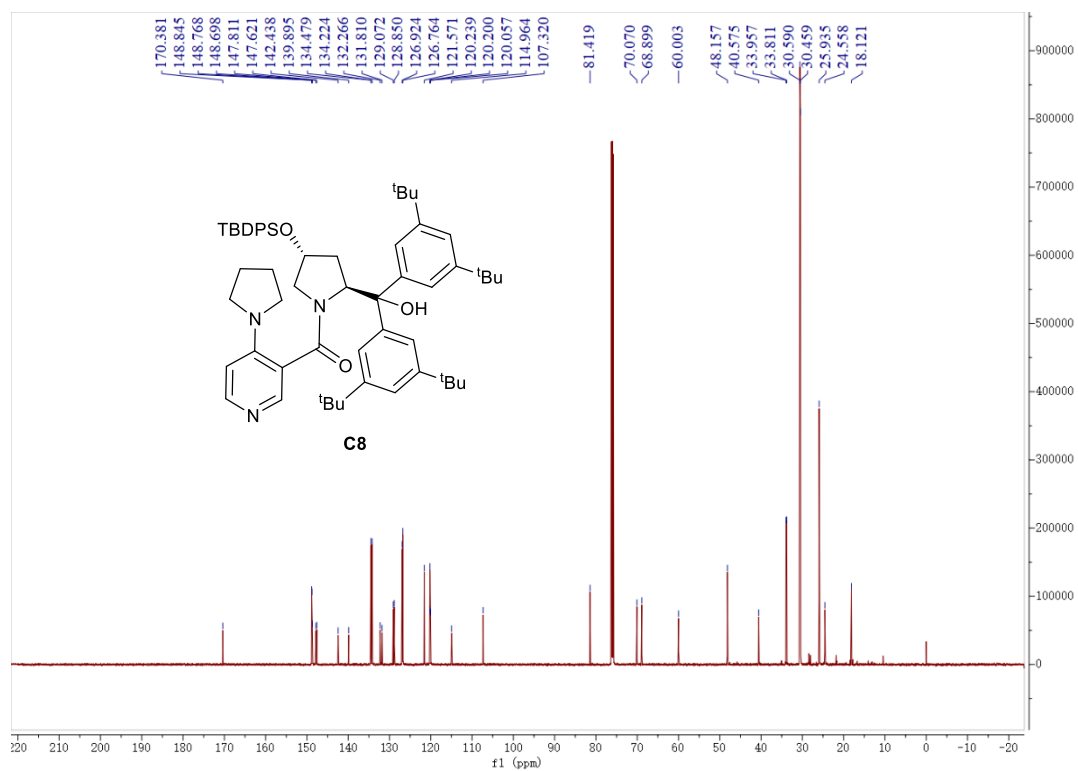

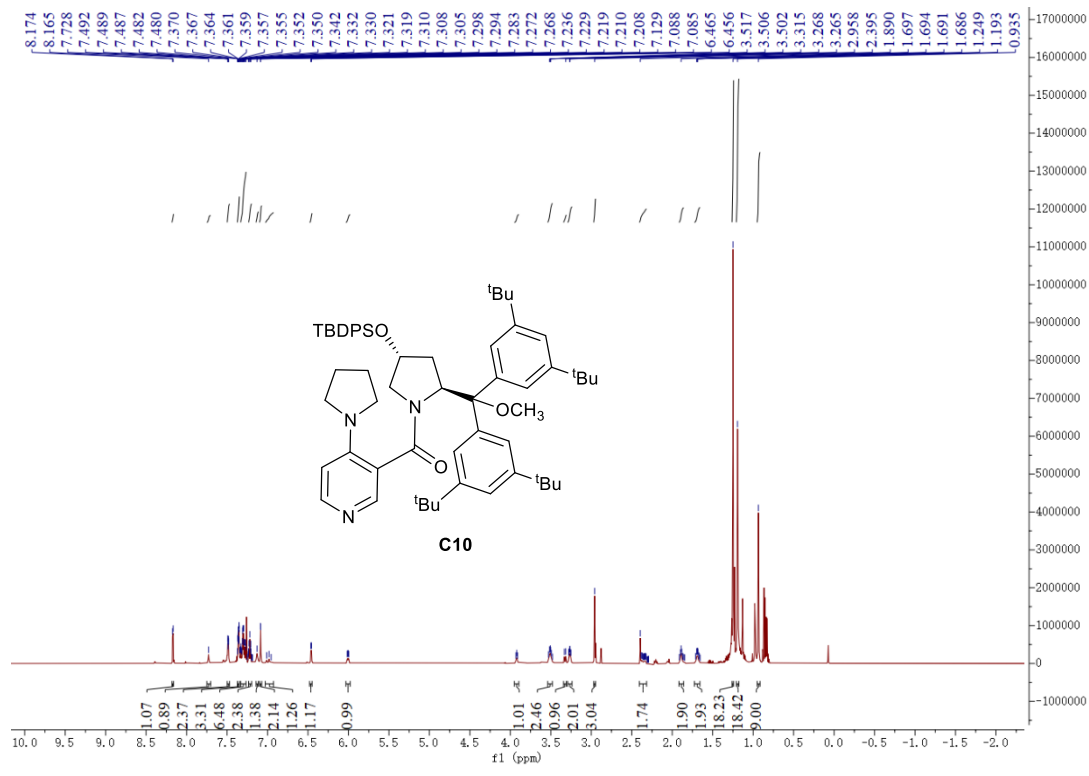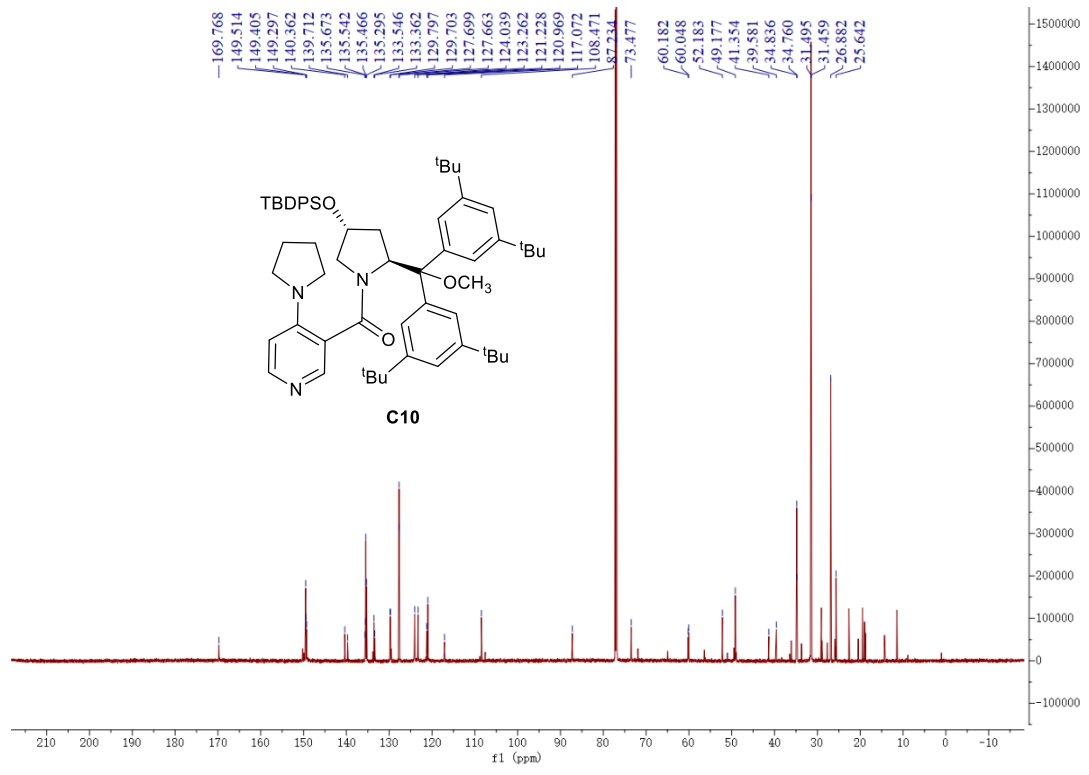



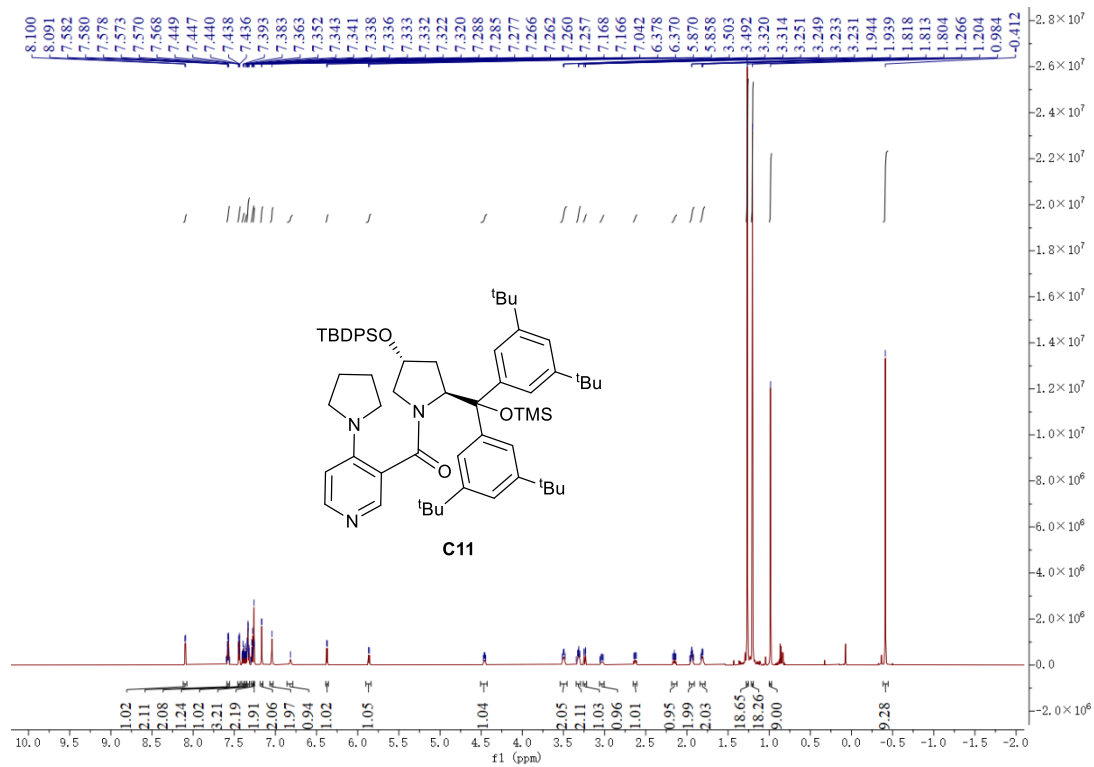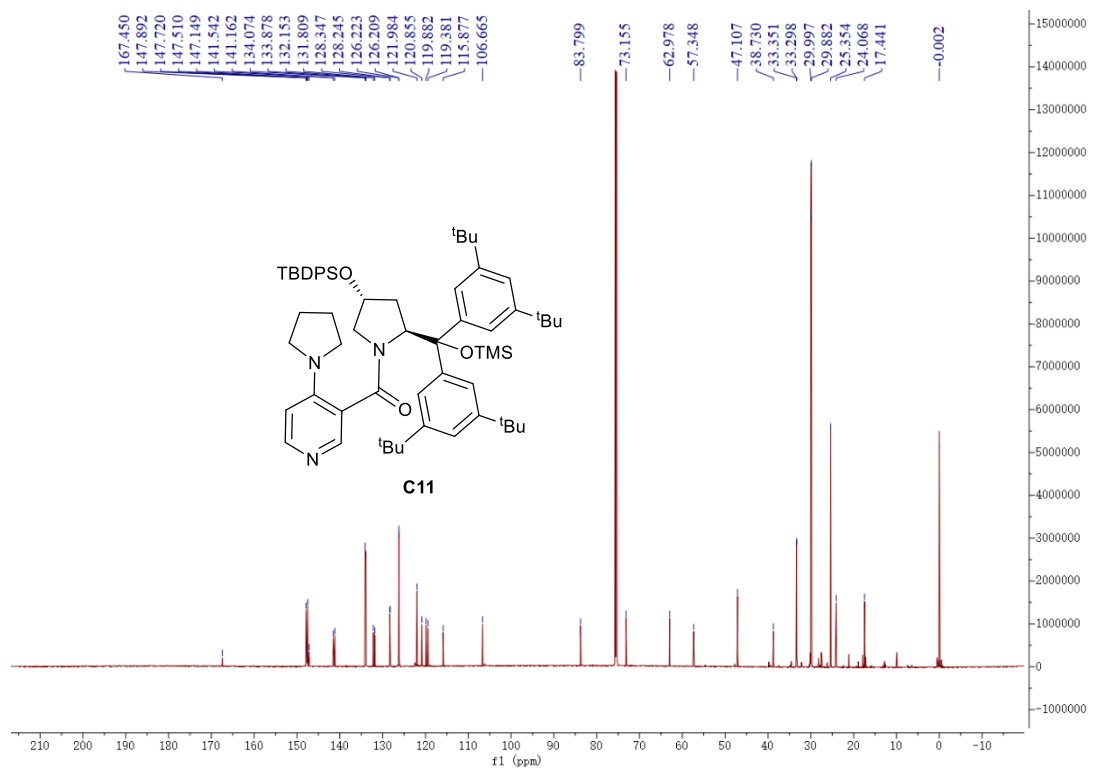

## 9.2 NMR spectra and HPLC chromatograms of 3

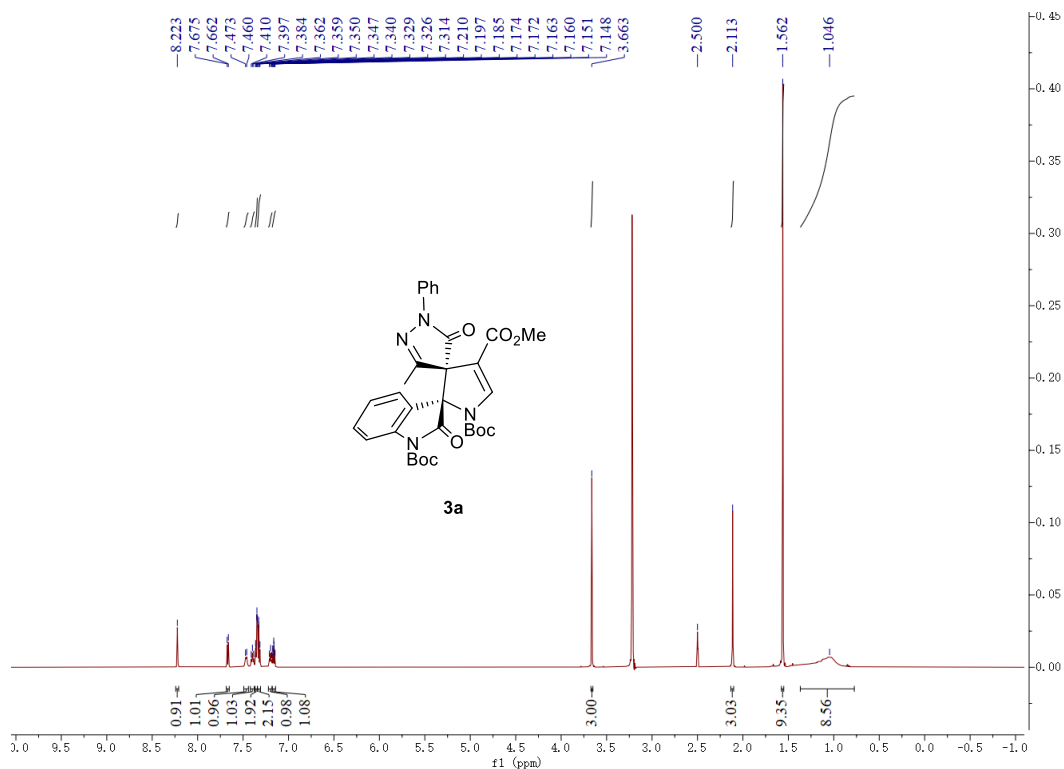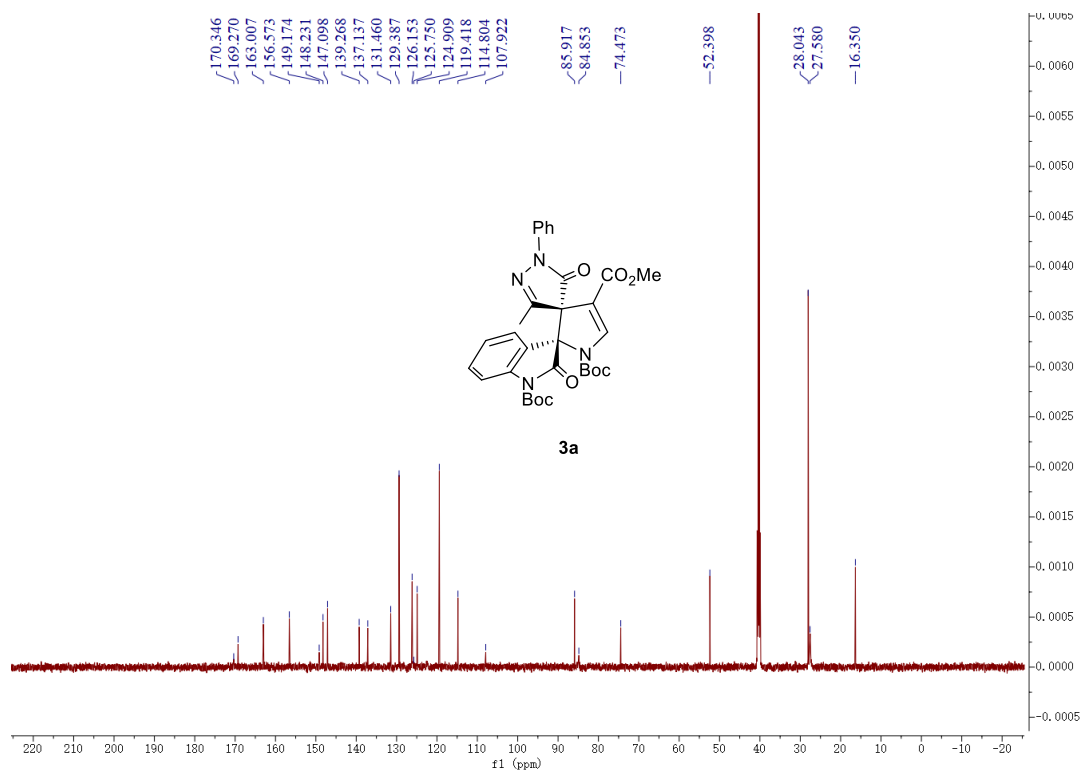

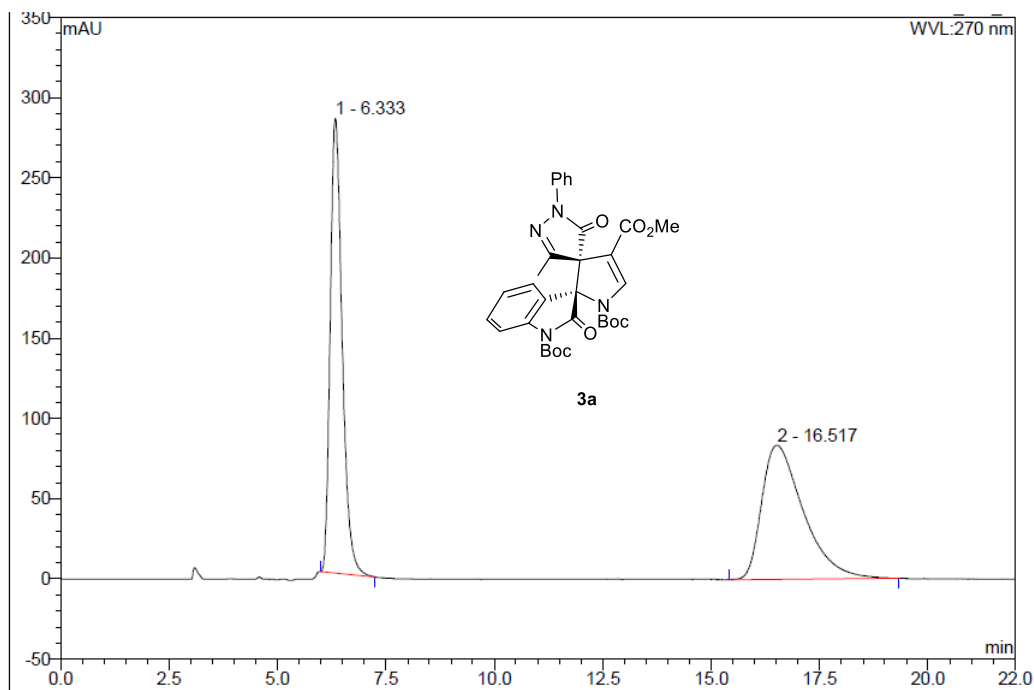

| No.           | Ret.Time min | Peak Name | Height mAU | Area mAU*min | Rel.Area % | Amount | Type |
|---------------|--------------|-----------|------------|--------------|------------|--------|------|
| 1             | 6.33         | n.a.      | 283.297    | 90.137       | 49.24      | n.a.   | BMB  |
| 2             | 16.52        | n.a.      | 83.525     | 92.927       | 50.76      | n.a.   | BMB  |
| <b>Total:</b> |              |           | 366.822    | 183.065      | 100.00     | 0.000  |      |

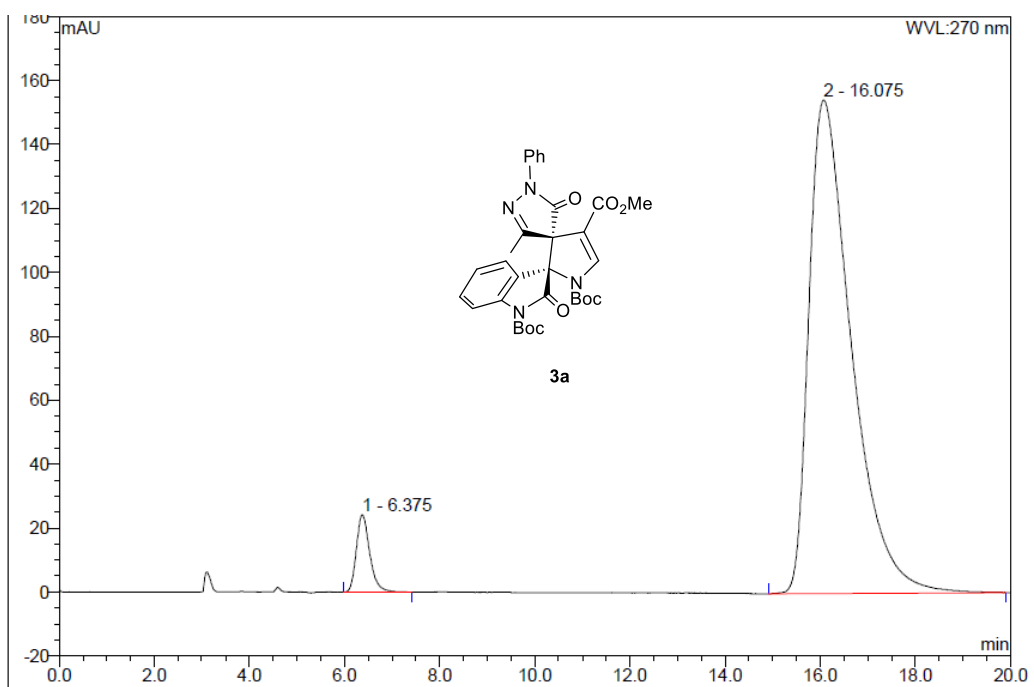

| No.           | Ret.Time min | Peak Name | Height mAU | Area mAU*min | Rel.Area % | Amount | Type |
|---------------|--------------|-----------|------------|--------------|------------|--------|------|
| 1             | 6.38         | n.a.      | 24.206     | 7.966        | 4.74       | n.a.   | BMB  |
| 2             | 16.08        | n.a.      | 154.363    | 160.089      | 95.26      | n.a.   | BMB  |
| <b>Total:</b> |              |           | 178.569    | 168.055      | 100.00     | 0.000  |      |

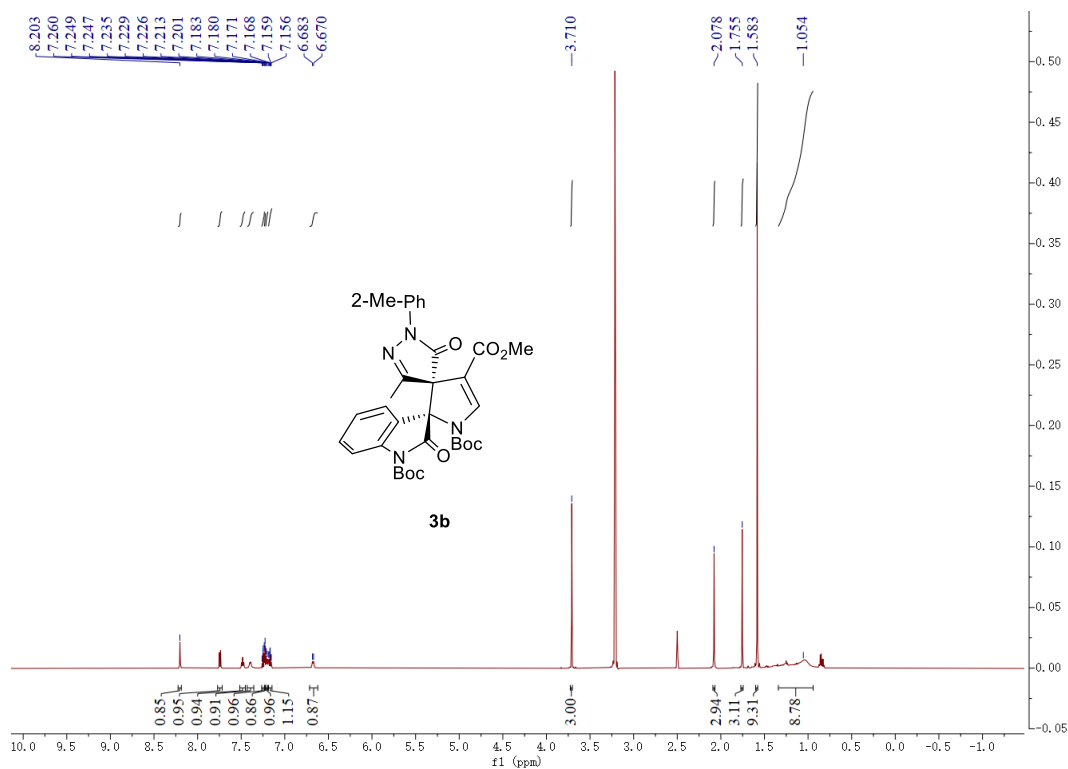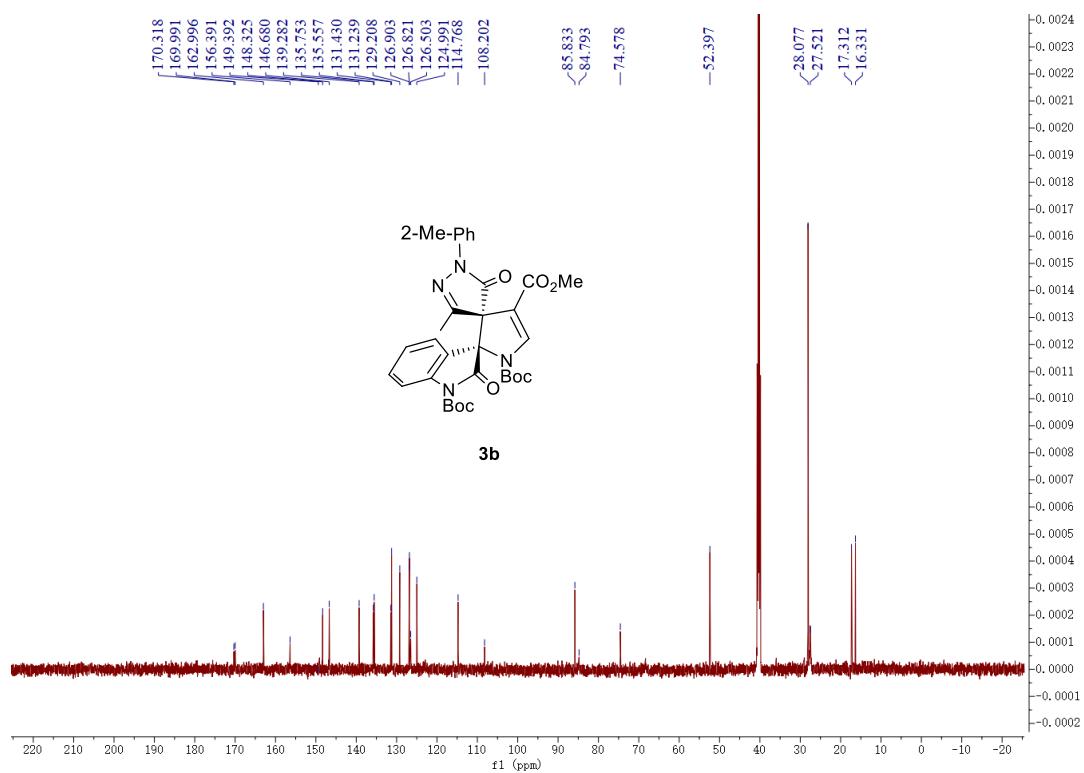

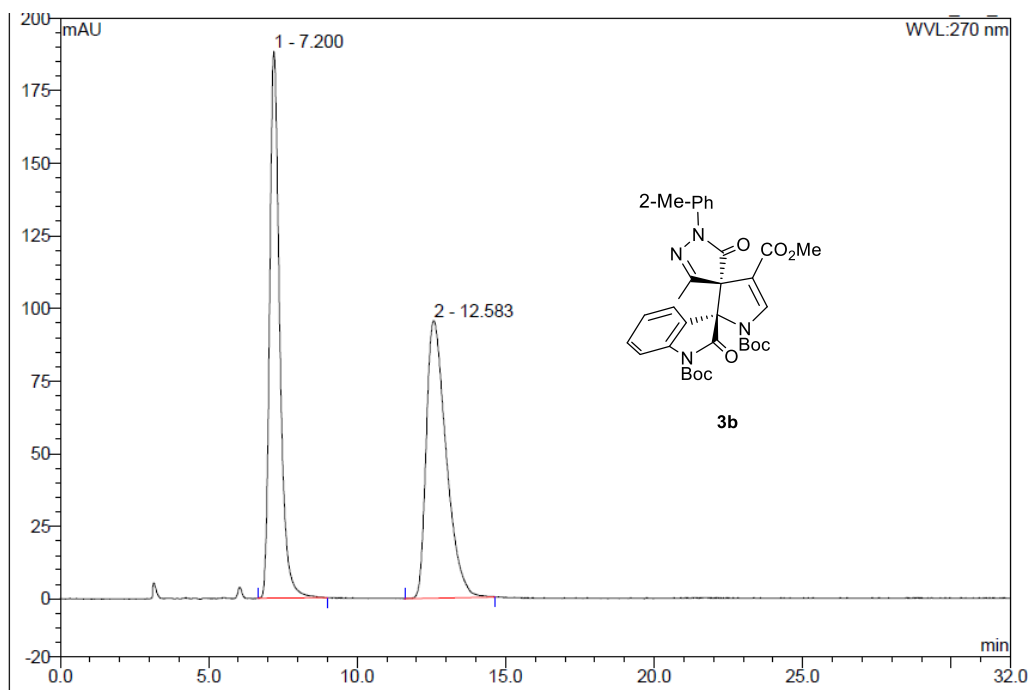

| No.           | Ret.Time<br>min | Peak Name | Height<br>mAU | Area<br>mAU*min | Rel.Area<br>% | Amount | Type |
|---------------|-----------------|-----------|---------------|-----------------|---------------|--------|------|
| 1             | 7.20            | n.a.      | 188.368       | 74.722          | 50.24         | n.a.   | BMB  |
| 2             | 12.58           | n.a.      | 95.617        | 73.999          | 49.76         | n.a.   | BMB  |
| <b>Total:</b> |                 |           | 283.985       | 148.720         | 100.00        | 0.000  |      |

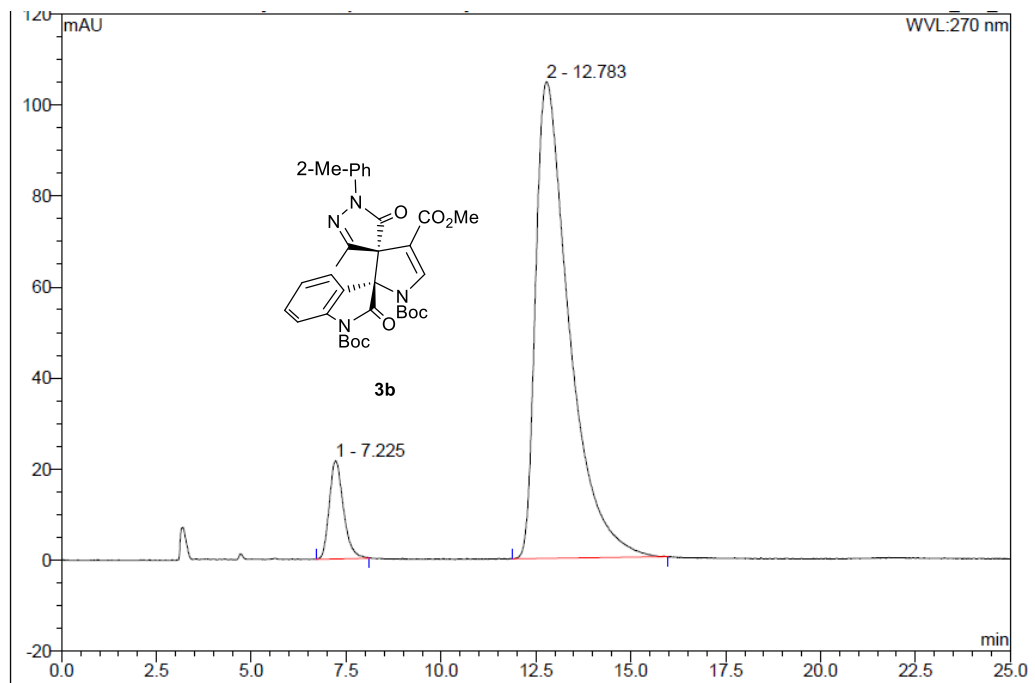

| No.           | Ret.Time<br>min | Peak Name | Height<br>mAU | Area<br>mAU*min | Rel.Area<br>% | Amount | Type |
|---------------|-----------------|-----------|---------------|-----------------|---------------|--------|------|
| 1             | 7.23            | n.a.      | 21.501        | 9.317           | 7.97          | n.a.   | BMB  |
| 2             | 12.78           | n.a.      | 104.733       | 107.602         | 92.03         | n.a.   | BMB* |
| <b>Total:</b> |                 |           | 126.234       | 116.918         | 100.00        | 0.000  |      |



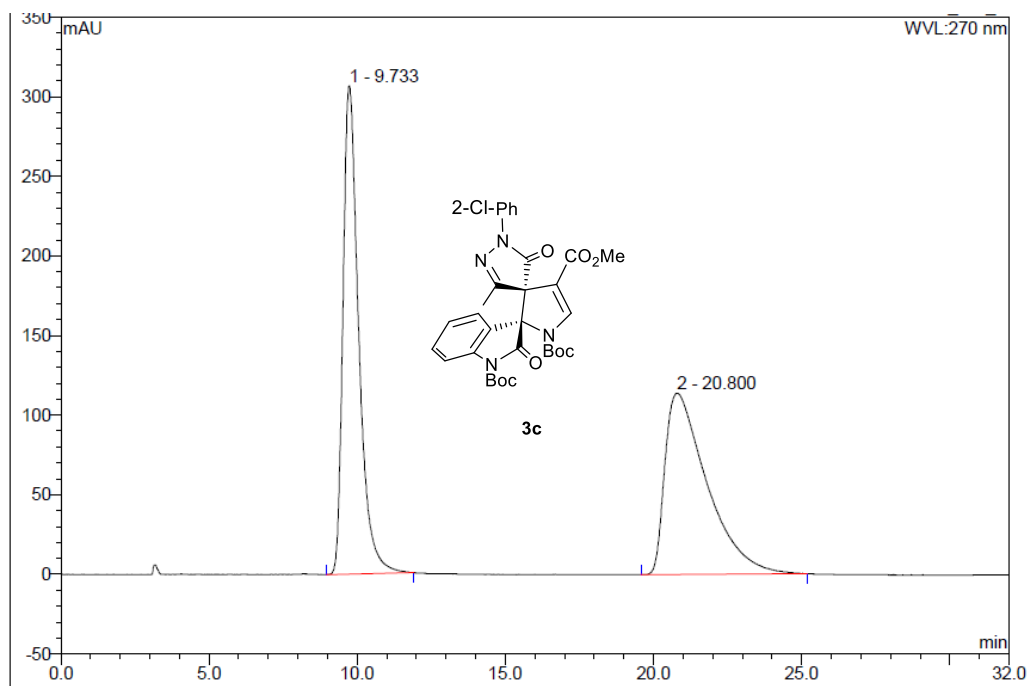

| No.           | Ret.Time min | Peak Name | Height mAU | Area mAU*min | Rel.Area % | Amount | Type |
|---------------|--------------|-----------|------------|--------------|------------|--------|------|
| 1             | 9.73         | n.a.      | 306.647    | 188.093      | 50.03      | n.a.   | BMB  |
| 2             | 20.80        | n.a.      | 114.006    | 187.905      | 49.97      | n.a.   | BMB  |
| <b>Total:</b> |              |           | 420.653    | 375.999      | 100.00     | 0.000  |      |

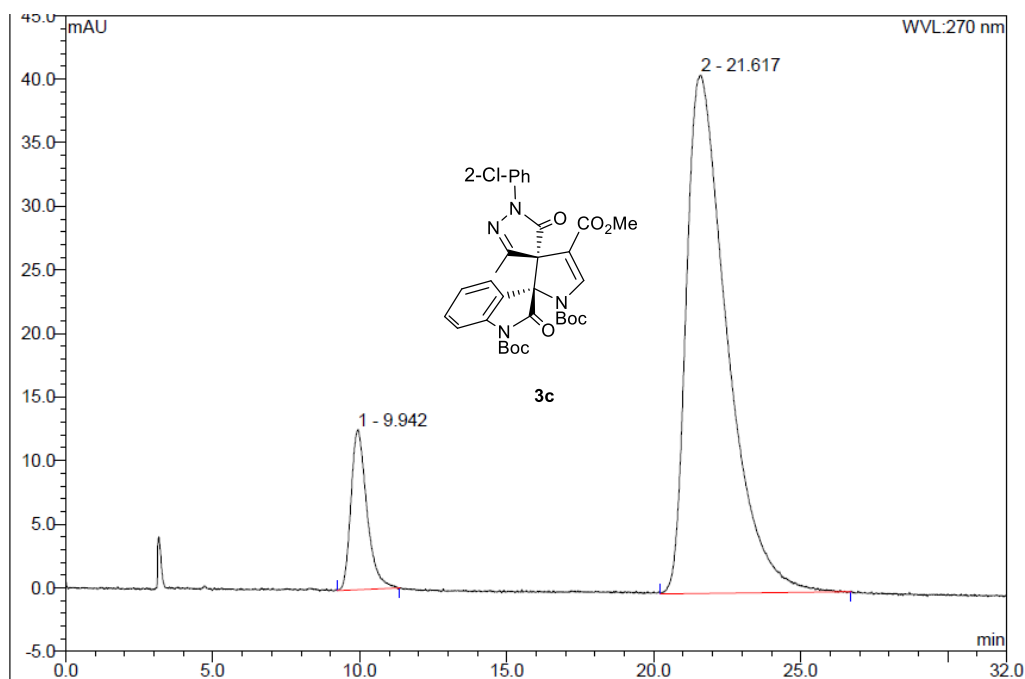

| No.           | Ret.Time min | Peak Name | Height mAU | Area mAU*min | Rel.Area % | Amount | Type |
|---------------|--------------|-----------|------------|--------------|------------|--------|------|
| 1             | 9.94         | n.a.      | 12.609     | 7.922        | 10.82      | n.a.   | BMB* |
| 2             | 21.62        | n.a.      | 40.742     | 65.289       | 89.18      | n.a.   | BMB* |
| <b>Total:</b> |              |           | 53.351     | 73.211       | 100.00     | 0.000  |      |

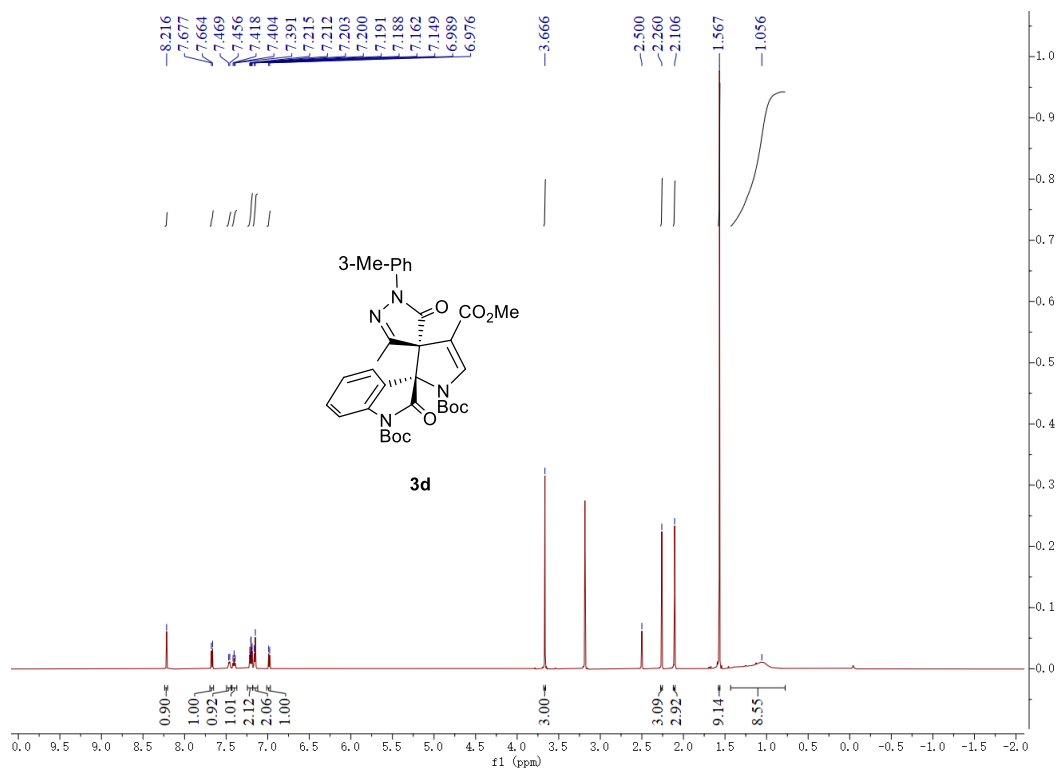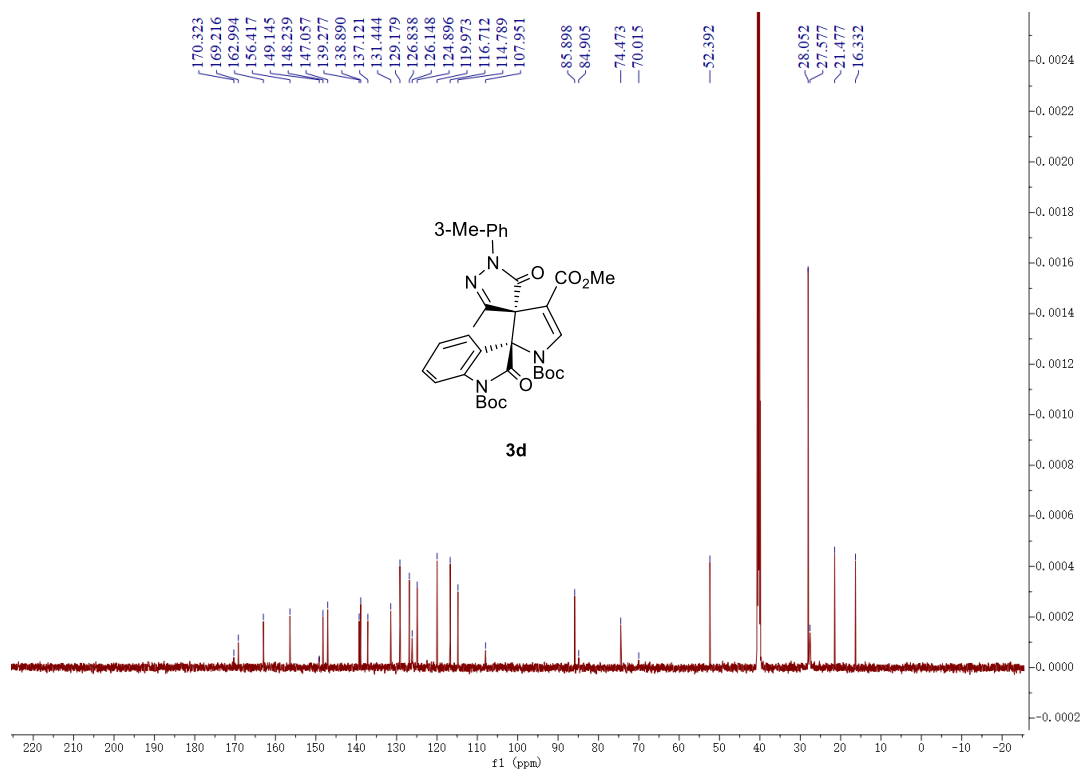



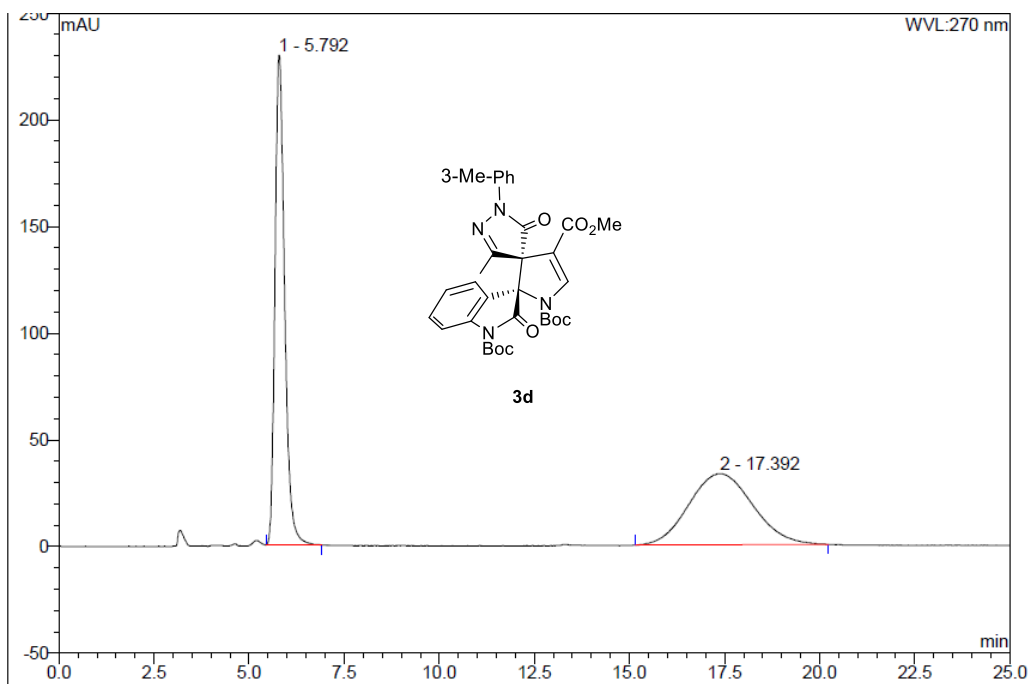

| No.           | Ret.Time<br>min | Peak Name | Height<br>mAU | Area<br>mAU*min | Rel.Area<br>% | Amount | Type |
|---------------|-----------------|-----------|---------------|-----------------|---------------|--------|------|
| 1             | 5.79            | n.a.      | 229.713       | 67.473          | 50.98         | n.a.   | BMB  |
| 2             | 17.39           | n.a.      | 33.336        | 64.870          | 49.02         | n.a.   | BMB* |
| <b>Total:</b> |                 |           | 263.050       | 132.343         | 100.00        | 0.000  |      |

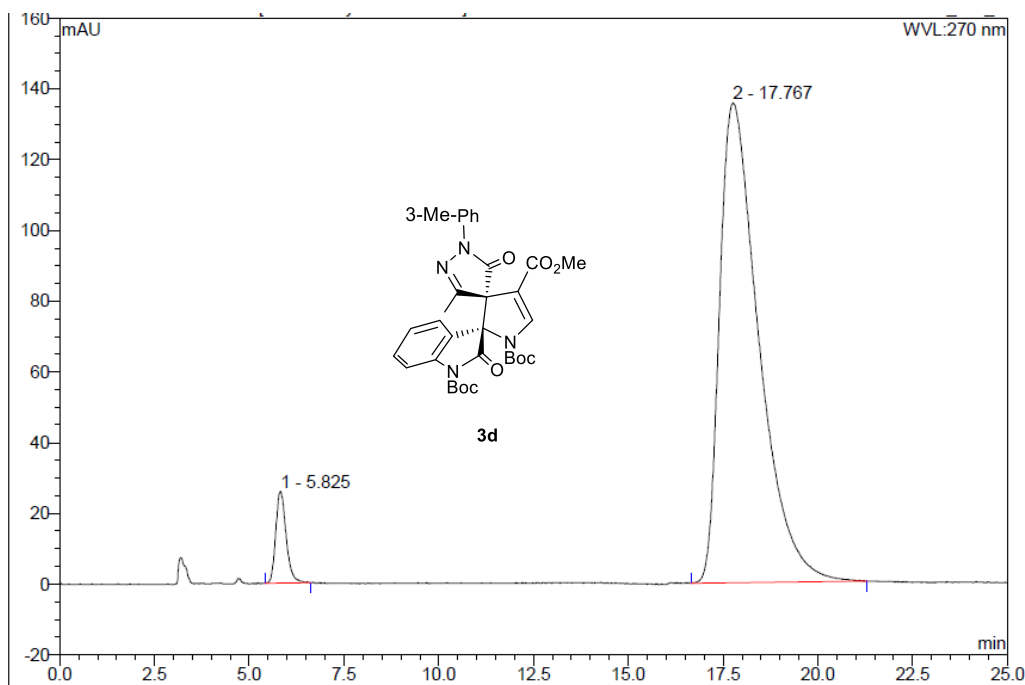

| No.           | Ret.Time<br>min | Peak Name | Height<br>mAU | Area<br>mAU*min | Rel.Area<br>% | Amount | Type |
|---------------|-----------------|-----------|---------------|-----------------|---------------|--------|------|
| 1             | 5.83            | n.a.      | 25.967        | 8.243           | 4.83          | n.a.   | BMB  |
| 2             | 17.77           | n.a.      | 135.559       | 162.461         | 95.17         | n.a.   | BMB* |
| <b>Total:</b> |                 |           | 161.526       | 170.704         | 100.00        | 0.000  |      |

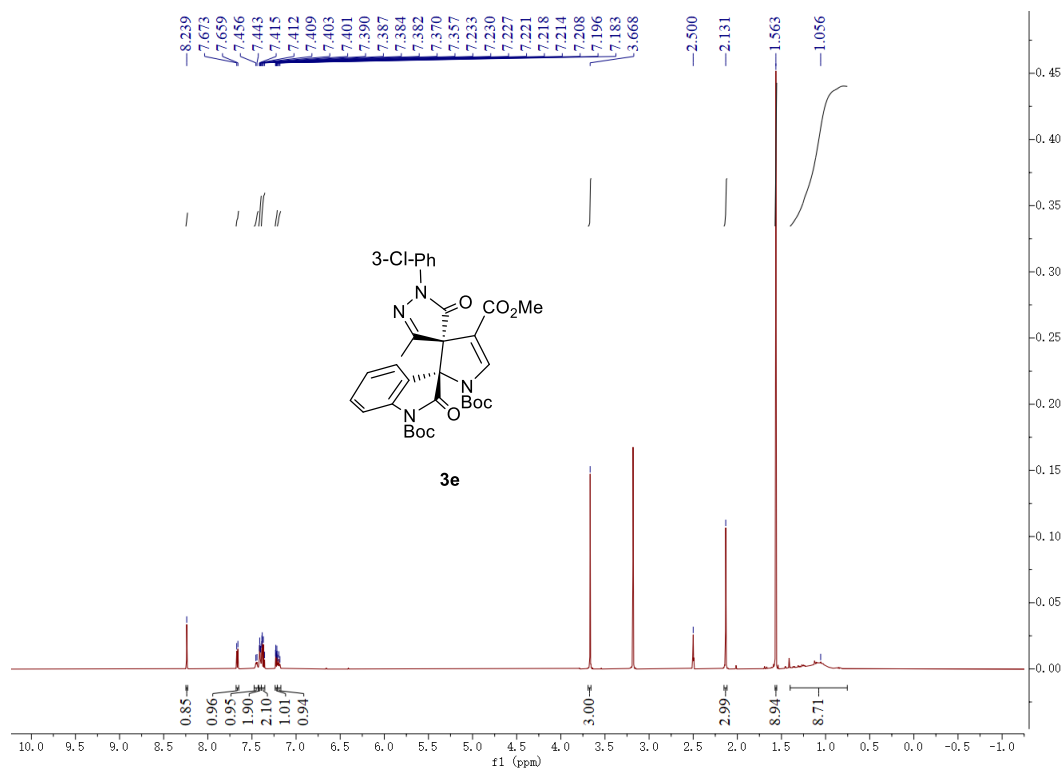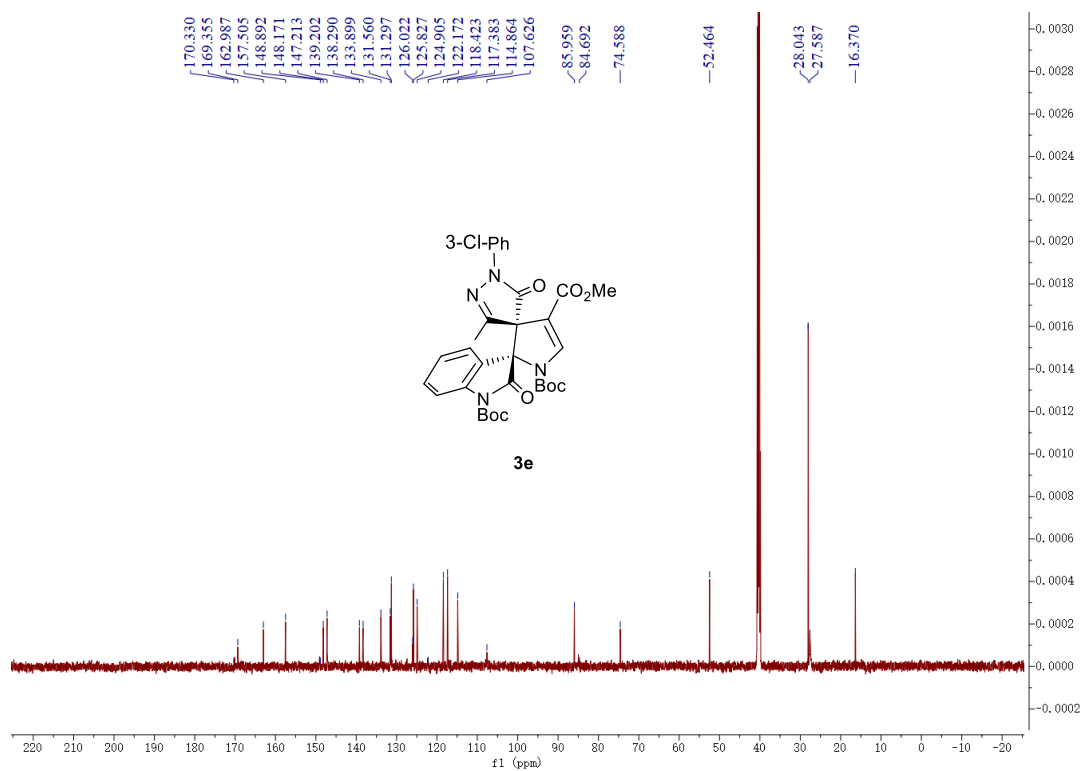

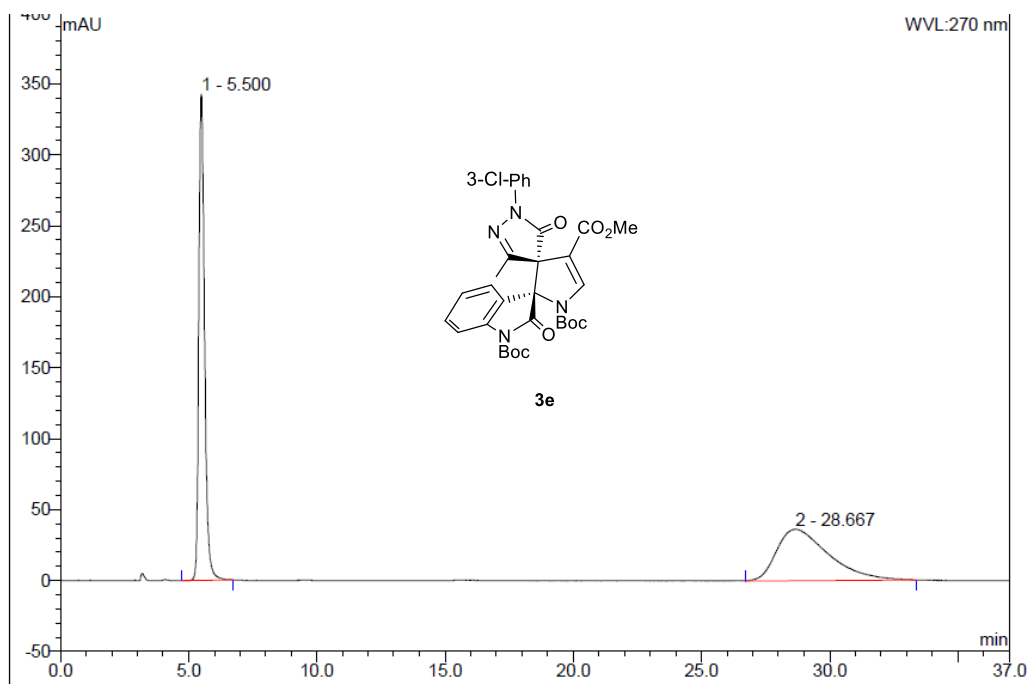

| No.           | Ret.Time<br>min | Peak Name | Height<br>mAU | Area<br>mAU*min | Rel.Area<br>% | Amount | Type |
|---------------|-----------------|-----------|---------------|-----------------|---------------|--------|------|
| 1             | 5.50            | n.a.      | 343.100       | 89.230          | 51.32         | n.a.   | BMB  |
| 2             | 28.67           | n.a.      | 36.167        | 84.644          | 48.68         | n.a.   | BMB* |
| <b>Total:</b> |                 |           | 379.267       | 173.875         | 100.00        | 0.000  |      |

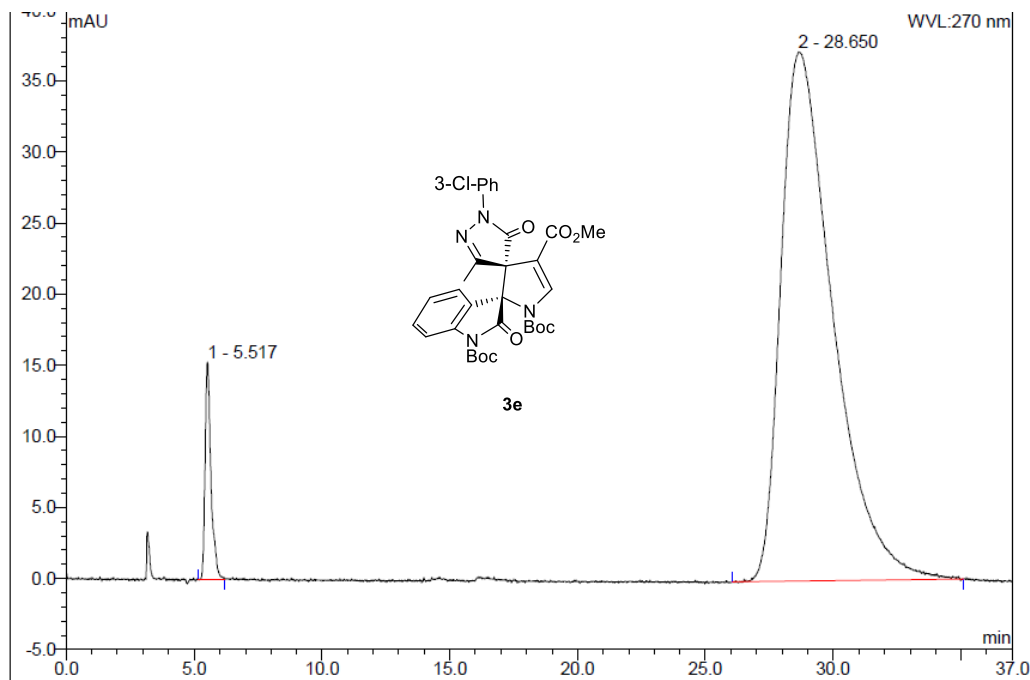

| No.           | Ret.Time<br>min | Peak Name | Height<br>mAU | Area<br>mAU*min | Rel.Area<br>% | Amount | Type |
|---------------|-----------------|-----------|---------------|-----------------|---------------|--------|------|
| 1             | 5.52            | n.a.      | 15.326        | 4.124           | 4.49          | n.a.   | BMB* |
| 2             | 28.65           | n.a.      | 37.218        | 87.795          | 95.51         | n.a.   | BMB* |
| <b>Total:</b> |                 |           | 52.544        | 91.919          | 100.00        | 0.000  |      |

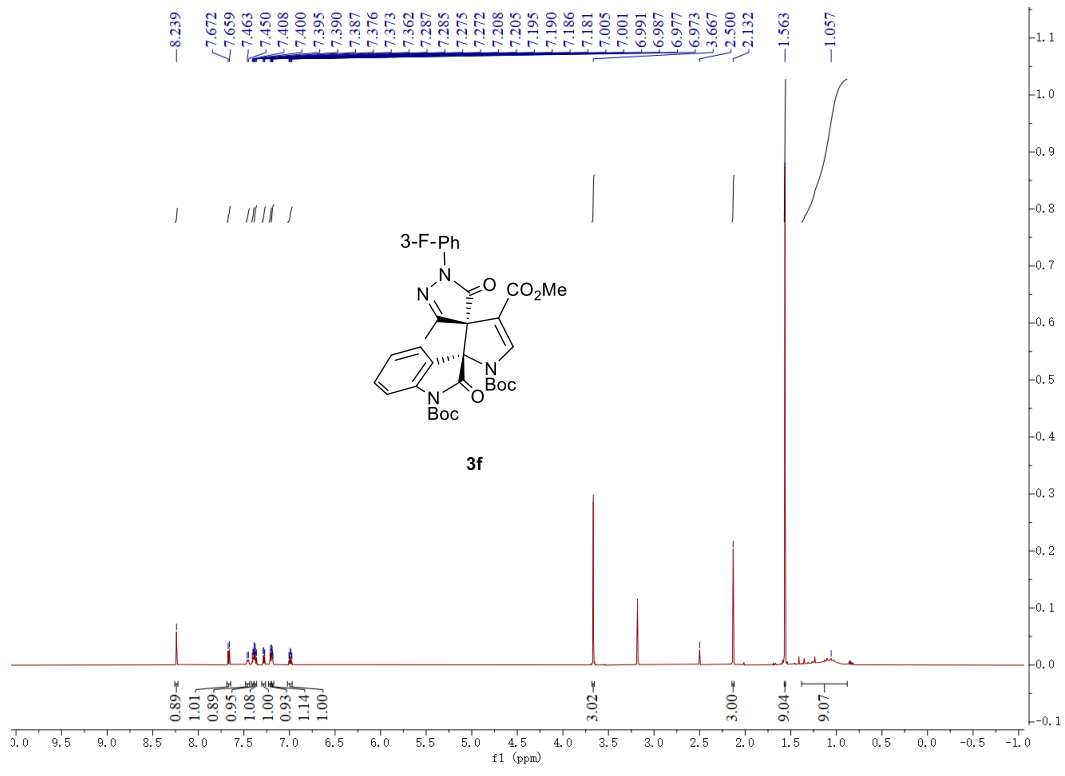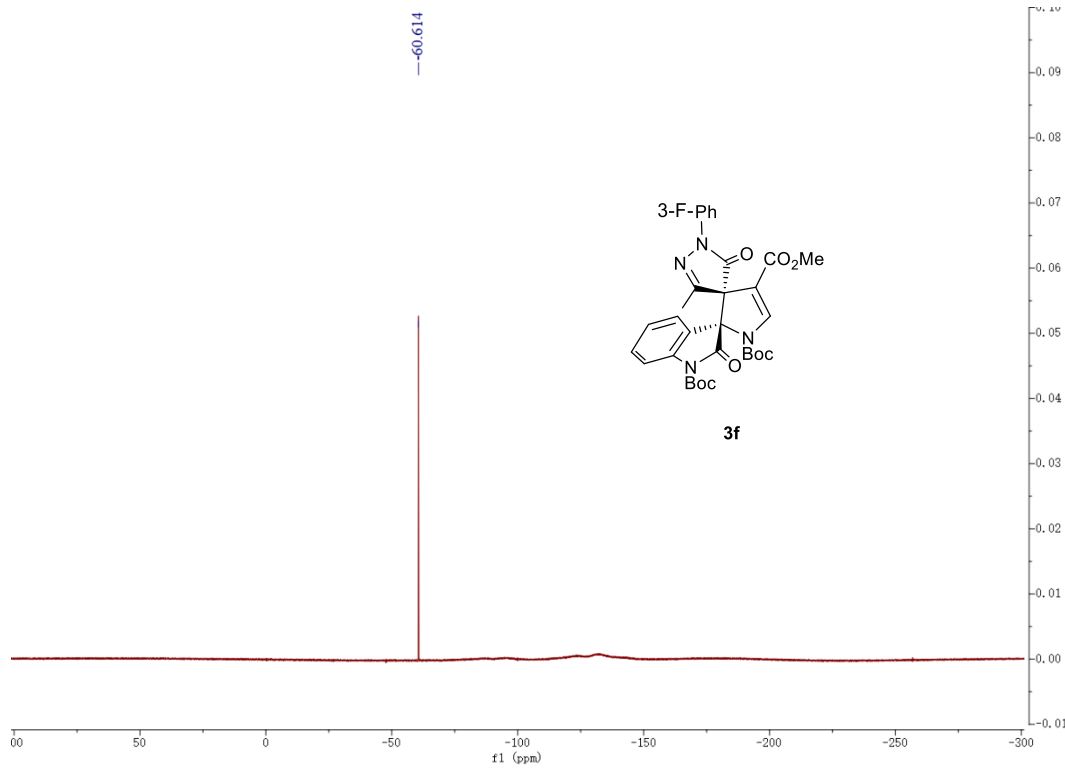

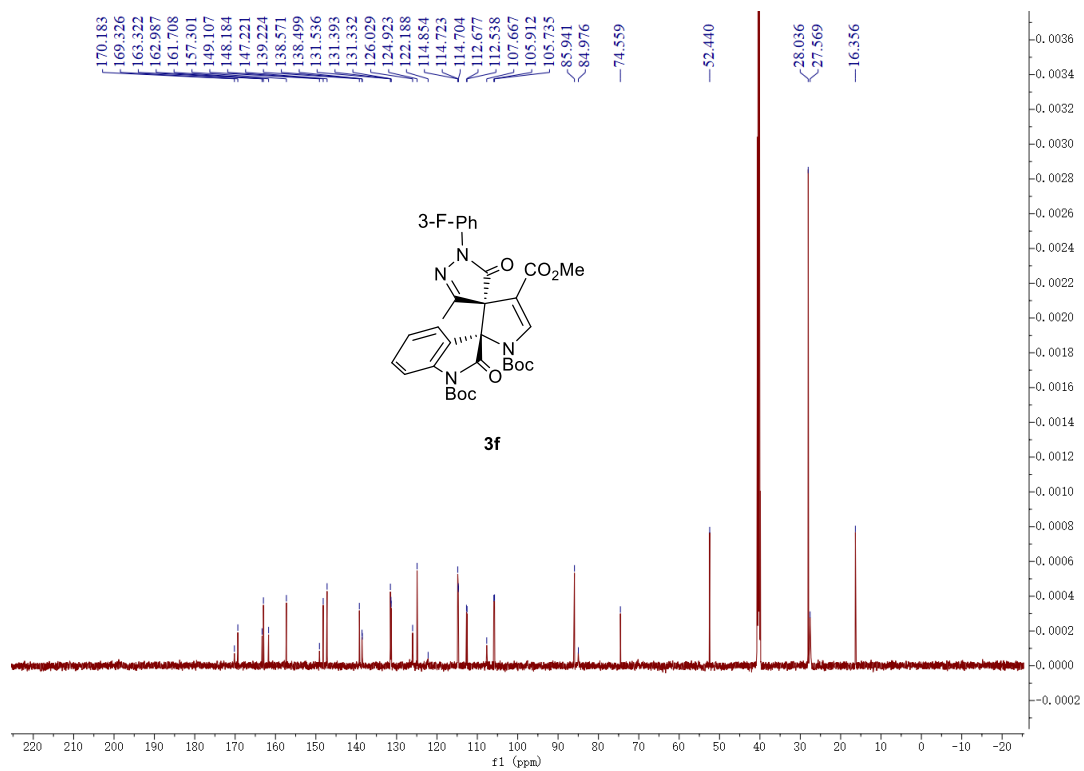

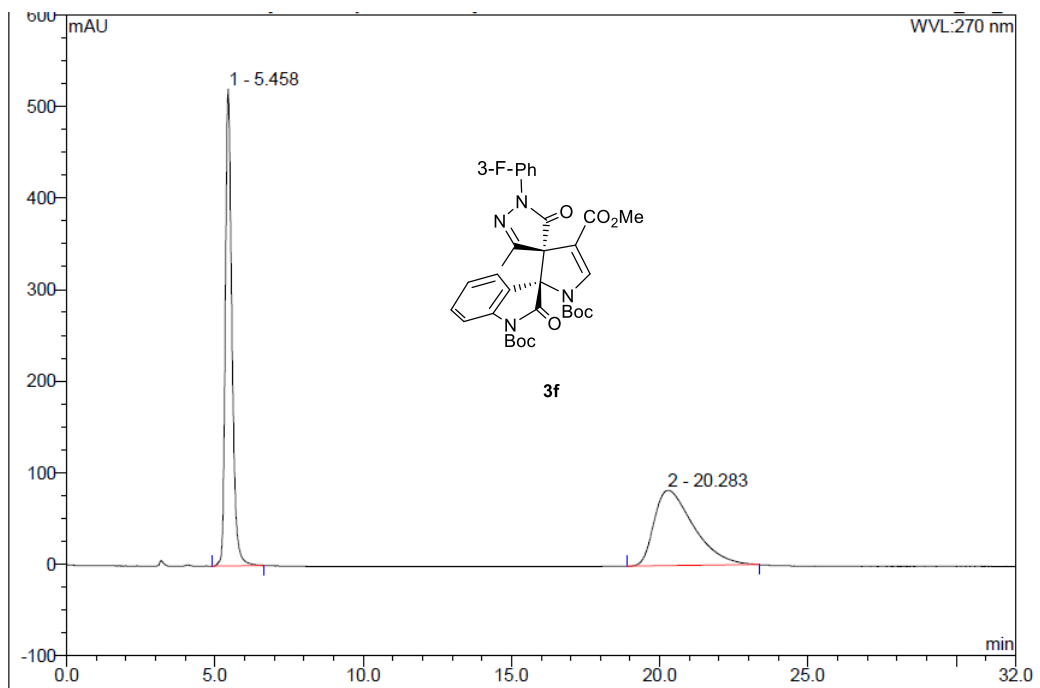

| No.           | Ret.Time<br>min | Peak Name | Height<br>mAU | Area<br>mAU*min | Rel.Area<br>% | Amount | Type |
|---------------|-----------------|-----------|---------------|-----------------|---------------|--------|------|
| 1             | 5.46            | n.a.      | 520.770       | 134.660         | 51.37         | n.a.   | BMB  |
| 2             | 20.28           | n.a.      | 82.430        | 127.501         | 48.63         | n.a.   | BMB* |
| <b>Total:</b> |                 |           | 603.200       | 262.160         | 100.00        | 0.000  |      |

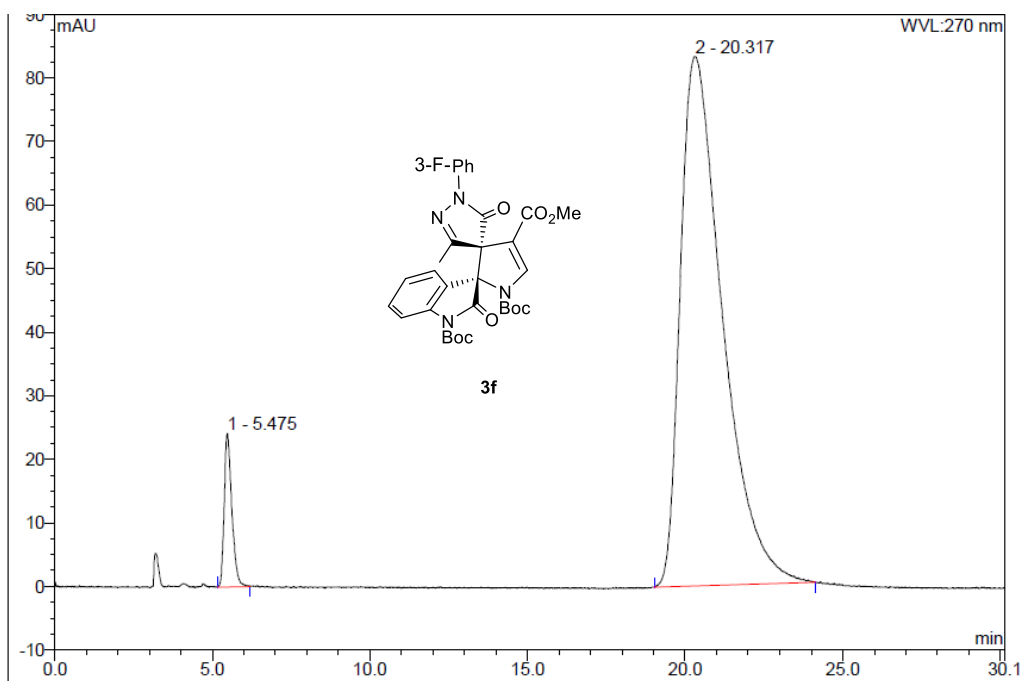

| No.           | Ret.Time<br>min | Peak Name | Height<br>mAU | Area<br>mAU*min | Rel.Area<br>% | Amount | Type |
|---------------|-----------------|-----------|---------------|-----------------|---------------|--------|------|
| 1             | 5.48            | n.a.      | 24.148        | 6.758           | 4.97          | n.a.   | BMB  |
| 2             | 20.32           | n.a.      | 83.354        | 129.158         | 95.03         | n.a.   | BMB* |
| <b>Total:</b> |                 |           | 107.502       | 135.916         | 100.00        | 0.000  |      |

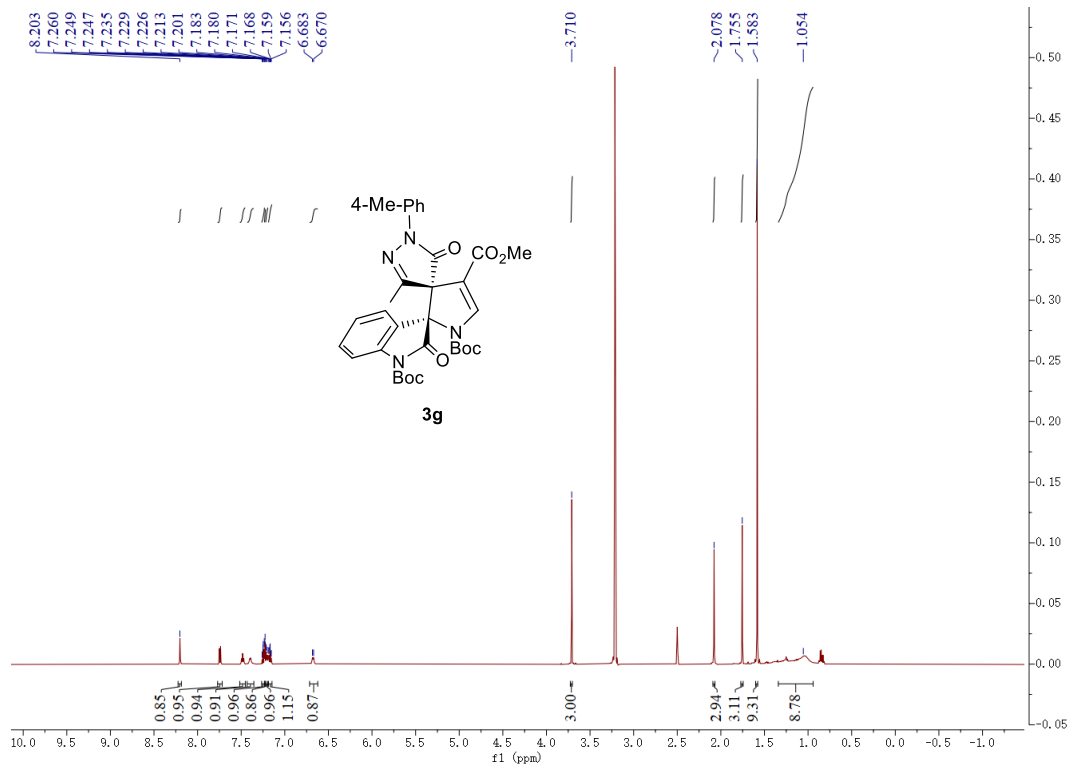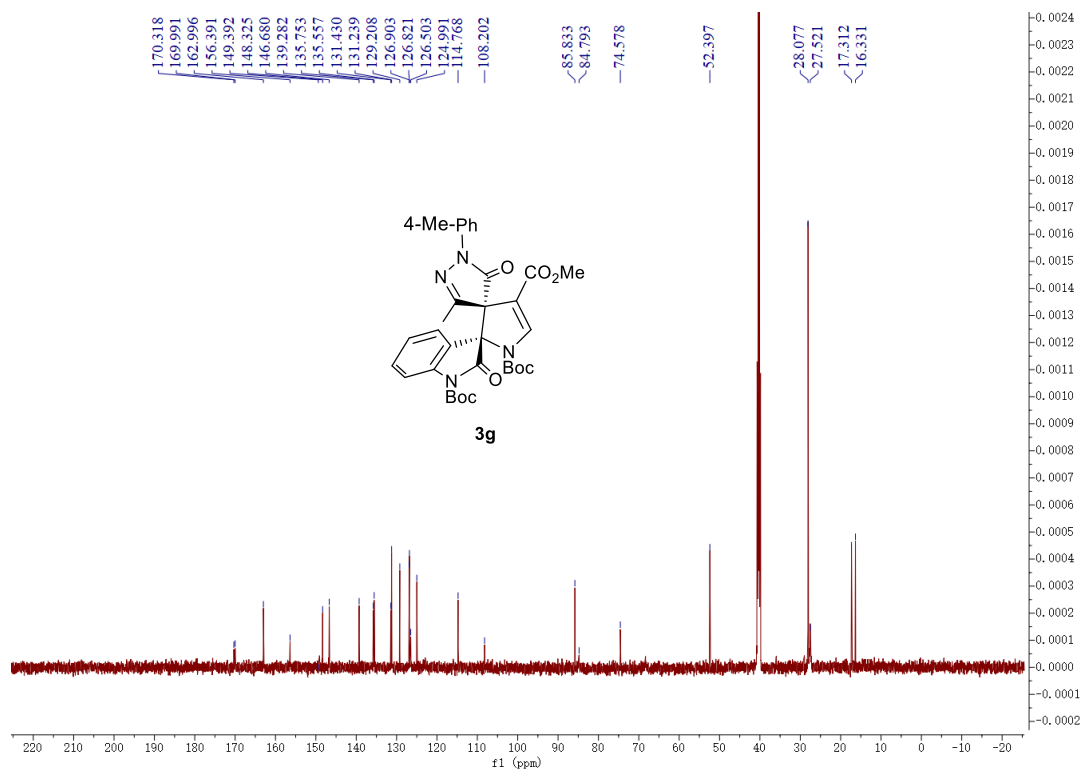

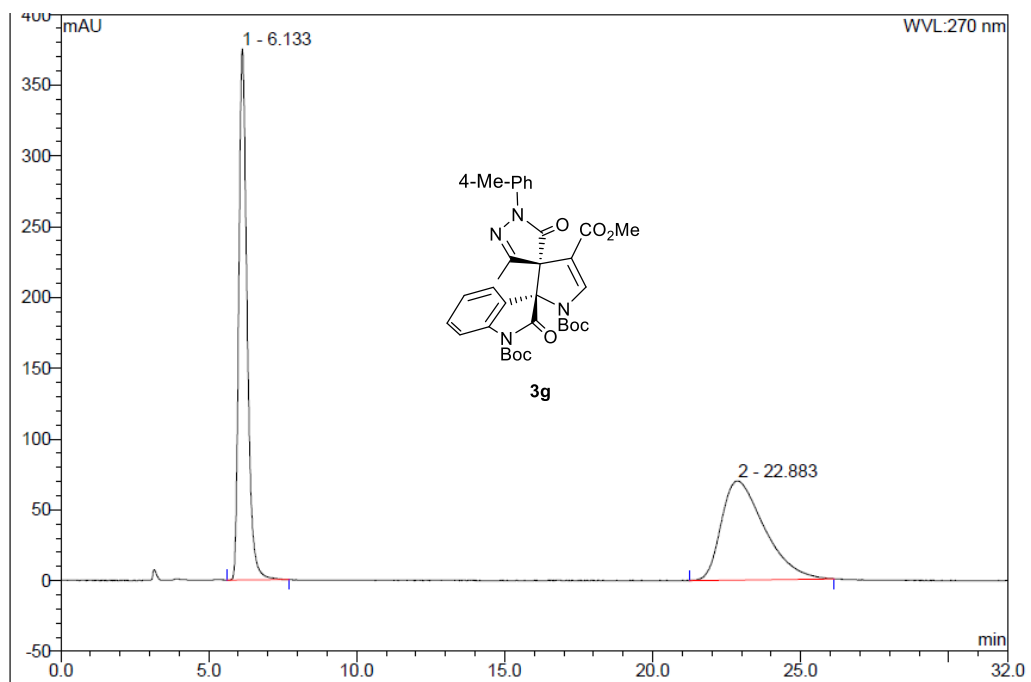

| No.           | Ret.Time<br>min | Peak Name | Height<br>mAU | Area<br>mAU*min | Rel.Area<br>% | Amount | Type |
|---------------|-----------------|-----------|---------------|-----------------|---------------|--------|------|
| 1             | 6.13            | n.a.      | 375.447       | 122.281         | 50.81         | n.a.   | BMB  |
| 2             | 22.88           | n.a.      | 69.952        | 118.379         | 49.19         | n.a.   | BMB* |
| <b>Total:</b> |                 |           | 445.399       | 240.660         | 100.00        | 0.000  |      |

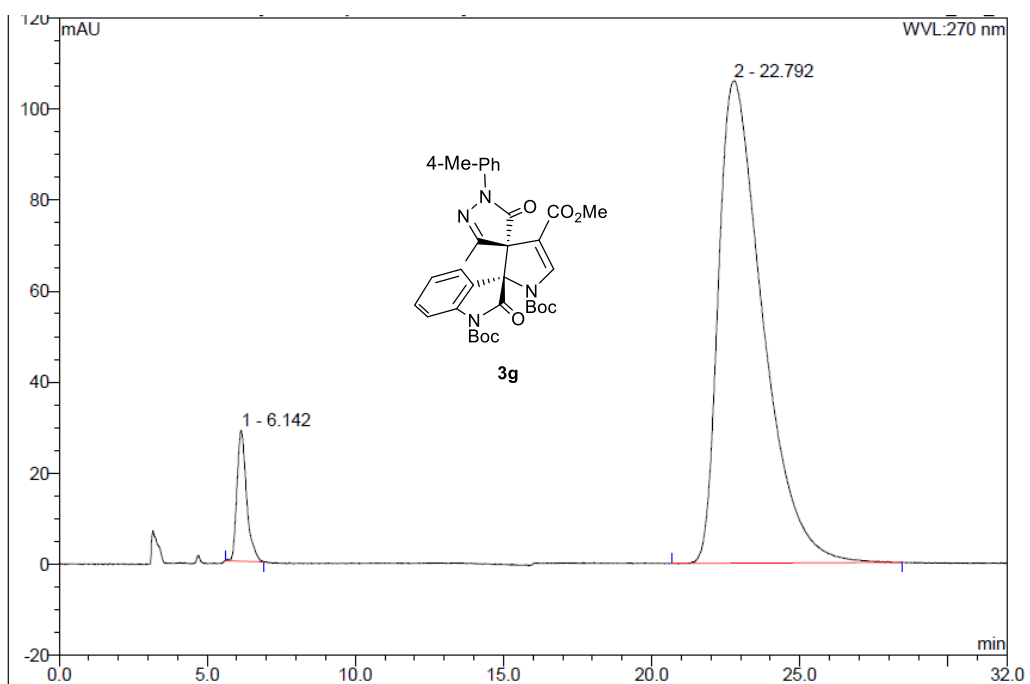

| No.           | Ret.Time<br>min | Peak Name | Height<br>mAU | Area<br>mAU*min | Rel.Area<br>% | Amount | Type |
|---------------|-----------------|-----------|---------------|-----------------|---------------|--------|------|
| 1             | 6.14            | n.a.      | 28.721        | 10.877          | 5.60          | n.a.   | BMB* |
| 2             | 22.79           | n.a.      | 105.883       | 183.238         | 94.40         | n.a.   | BMB* |
| <b>Total:</b> |                 |           | 134.604       | 194.114         | 100.00        | 0.000  |      |



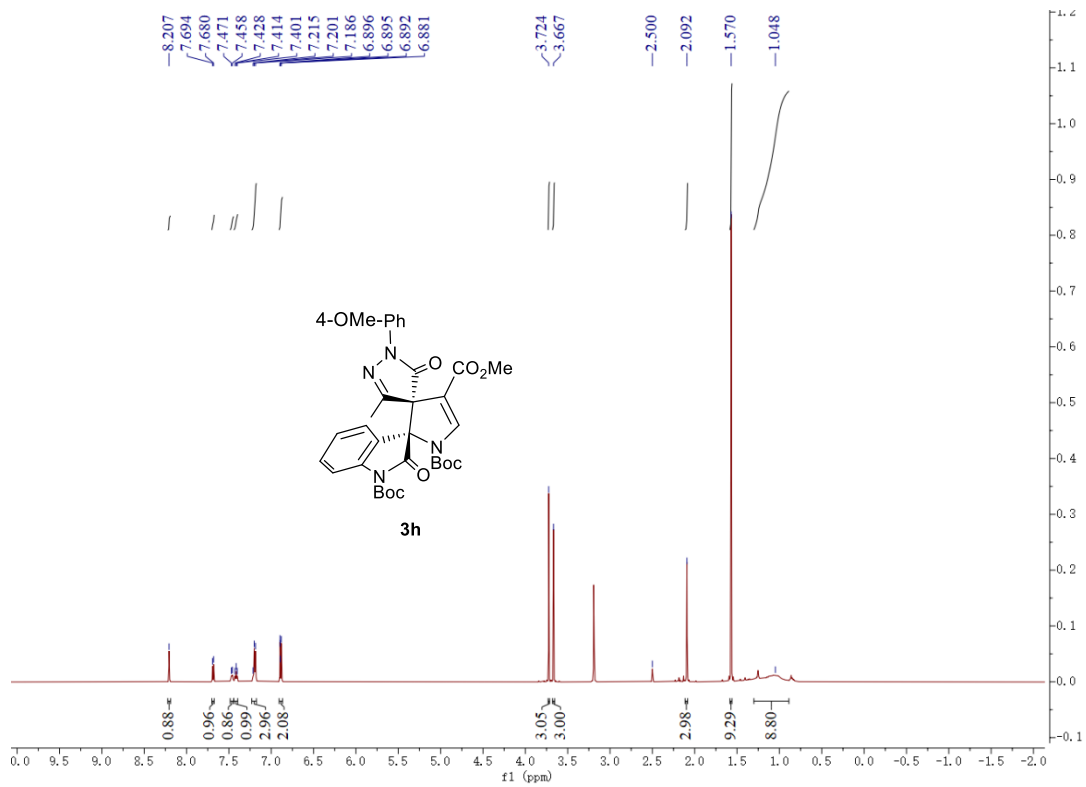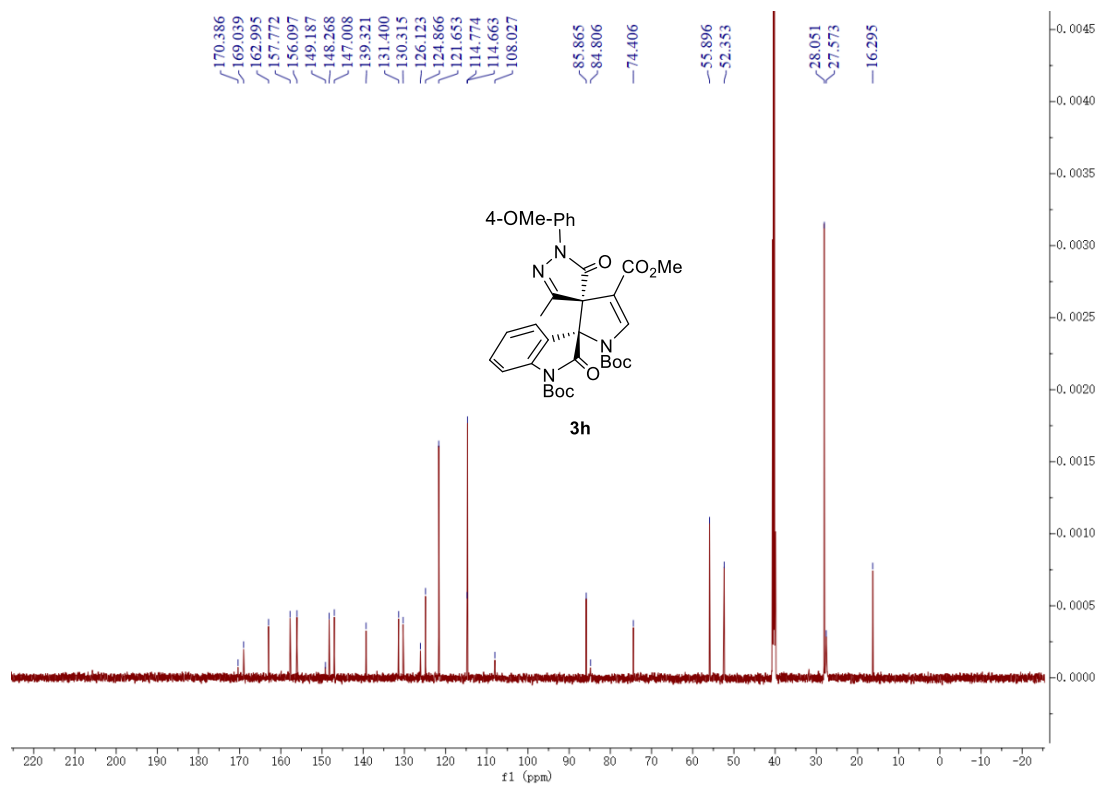

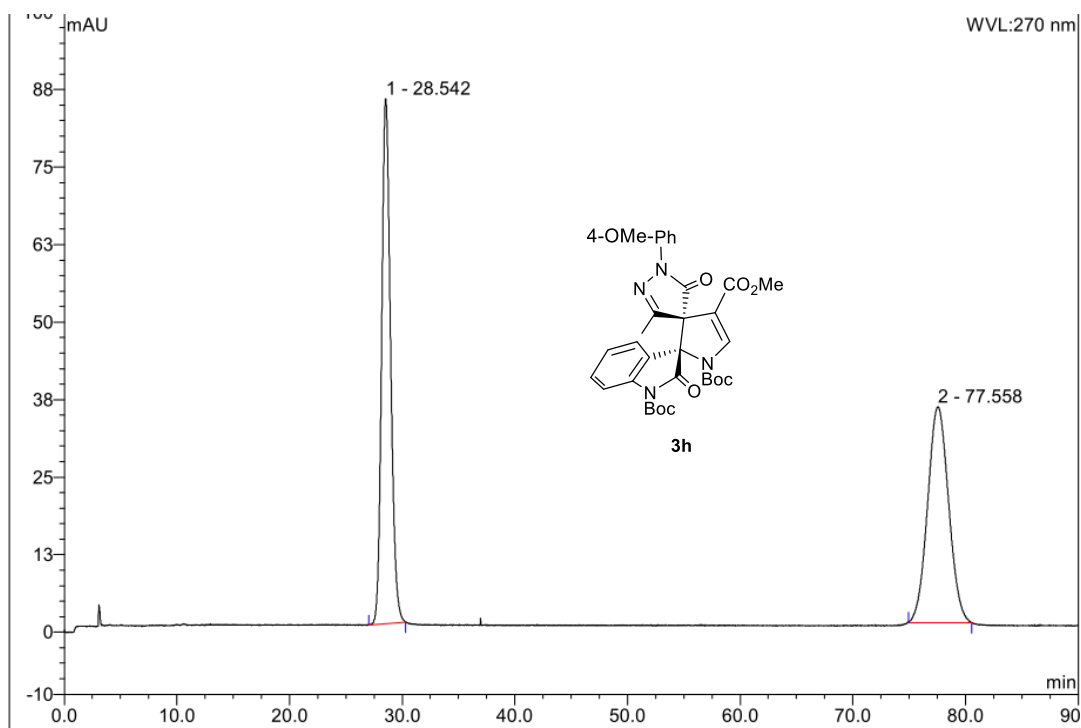

| No.           | Ret.Time min | Peak Name | Height mAU | Area mAU*min | Rel.Area % | Amount | Type |
|---------------|--------------|-----------|------------|--------------|------------|--------|------|
| 1             | 28.54        | n.a.      | 84.680     | 77.502       | 50.69      | n.a.   | BMB  |
| 2             | 77.56        | n.a.      | 34.843     | 75.392       | 49.31      | n.a.   | BMB  |
| <b>Total:</b> |              |           | 119.523    | 152.894      | 100.00     | 0.000  |      |

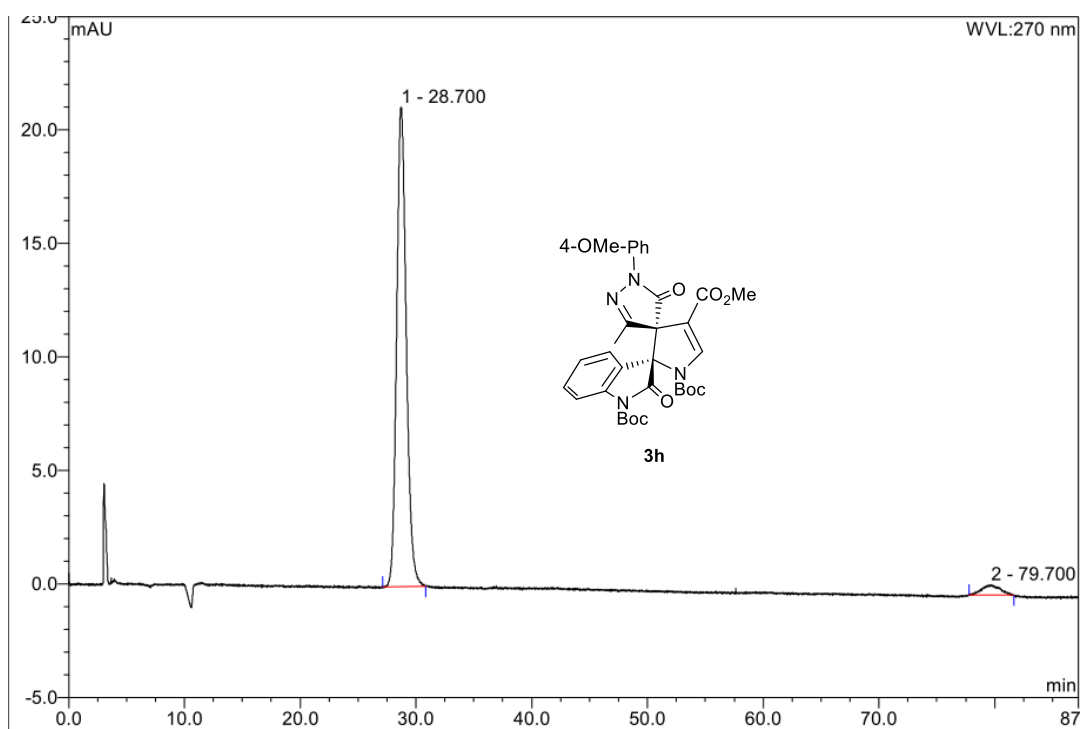

| No.           | Ret.Time min | Peak Name | Height mAU | Area mAU*min | Rel.Area % | Amount | Type |
|---------------|--------------|-----------|------------|--------------|------------|--------|------|
| 1             | 28.70        | n.a.      | 21.154     | 20.329       | 96.16      | n.a.   | BMB* |
| 2             | 79.70        | n.a.      | 0.465      | 0.812        | 3.84       | n.a.   | BMB* |
| <b>Total:</b> |              |           | 21.619     | 21.141       | 100.00     | 0.000  |      |

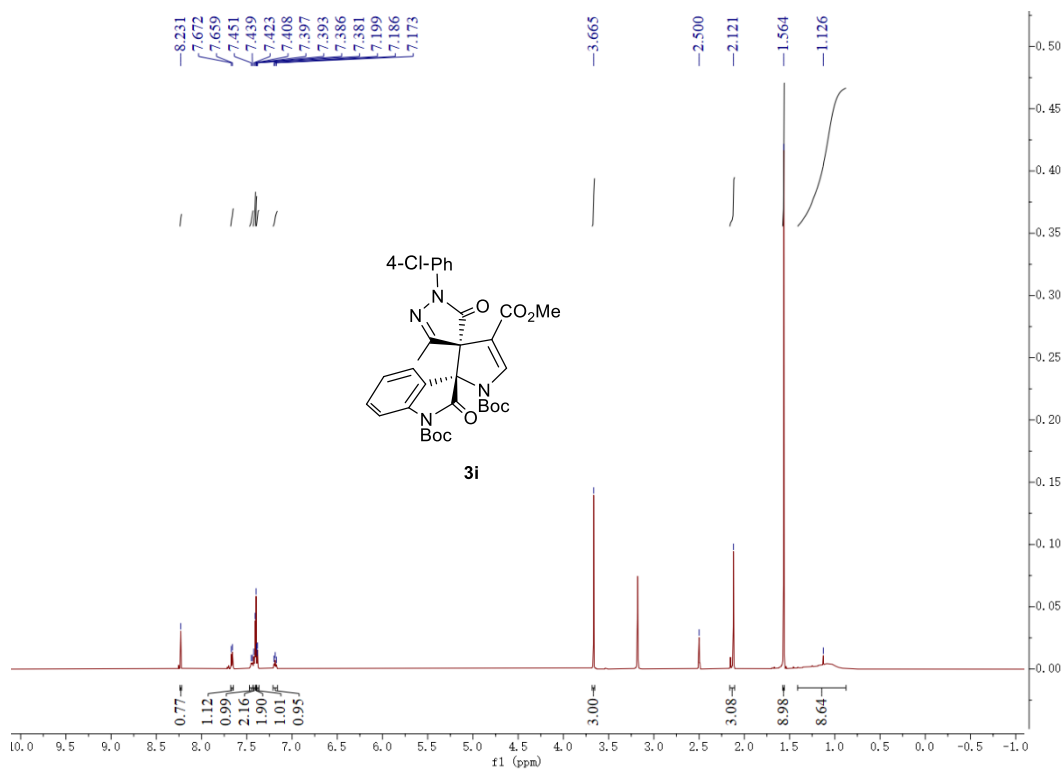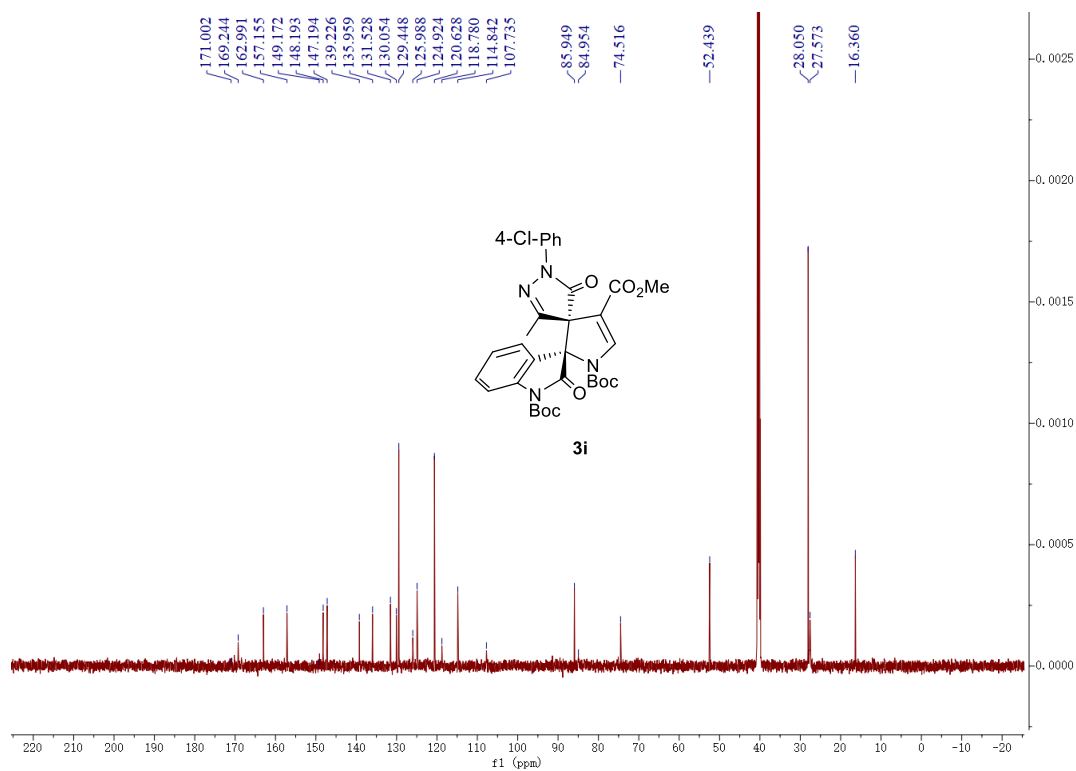

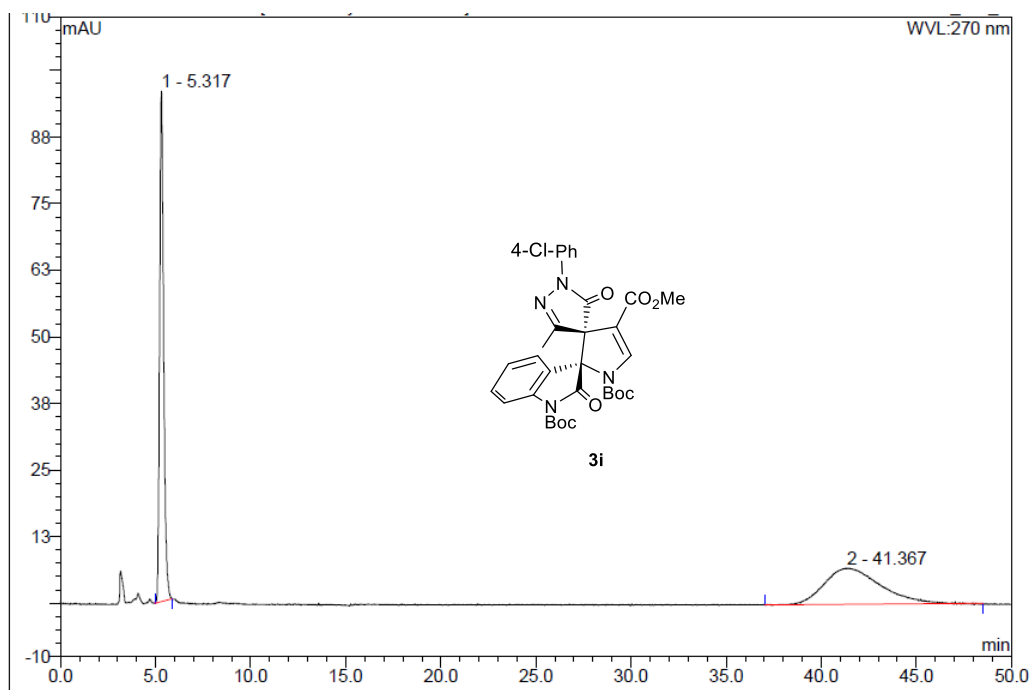

| No.           | Ret.Time<br>min | Peak Name | Height<br>mAU | Area<br>mAU*min | Rel.Area<br>% | Amount | Type |
|---------------|-----------------|-----------|---------------|-----------------|---------------|--------|------|
| 1             | 5.32            | n.a.      | 95.752        | 23.839          | 50.72         | n.a.   | BMB* |
| 2             | 41.37           | n.a.      | 6.768         | 23.163          | 49.28         | n.a.   | BMB* |
| <b>Total:</b> |                 |           | 102.520       | 47.002          | 100.00        | 0.000  |      |

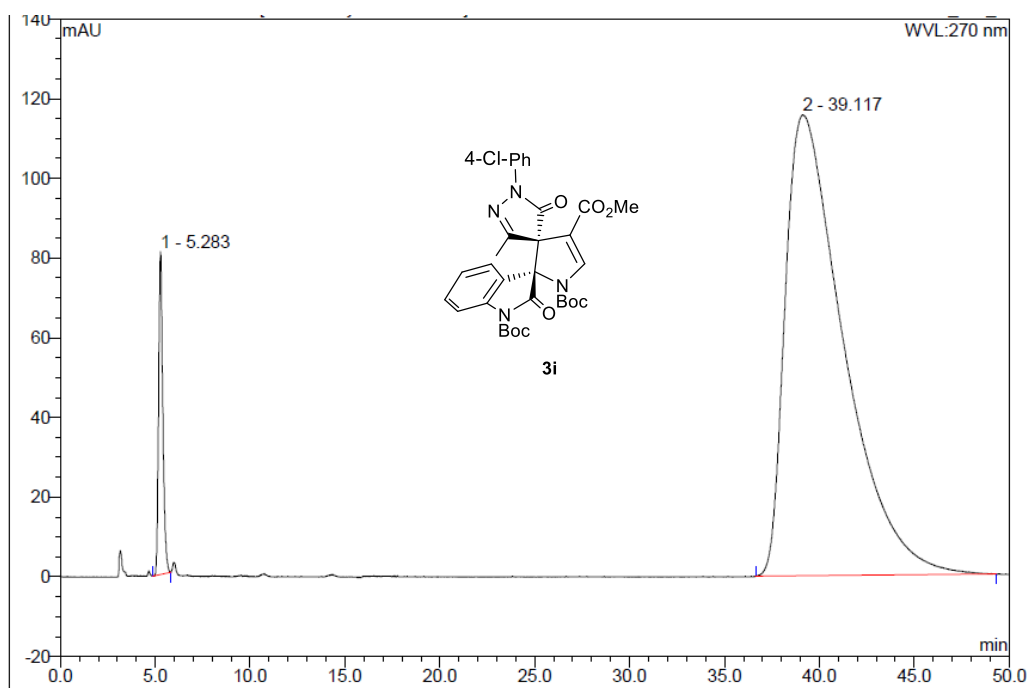

| No.           | Ret.Time<br>min | Peak Name | Height<br>mAU | Area<br>mAU*min | Rel.Area<br>% | Amount | Type |
|---------------|-----------------|-----------|---------------|-----------------|---------------|--------|------|
| 1             | 5.28            | n.a.      | 81.039        | 21.202          | 4.90          | n.a.   | BMB  |
| 2             | 39.12           | n.a.      | 115.682       | 411.930         | 95.10         | n.a.   | BMB* |
| <b>Total:</b> |                 |           | 196.721       | 433.132         | 100.00        | 0.000  |      |

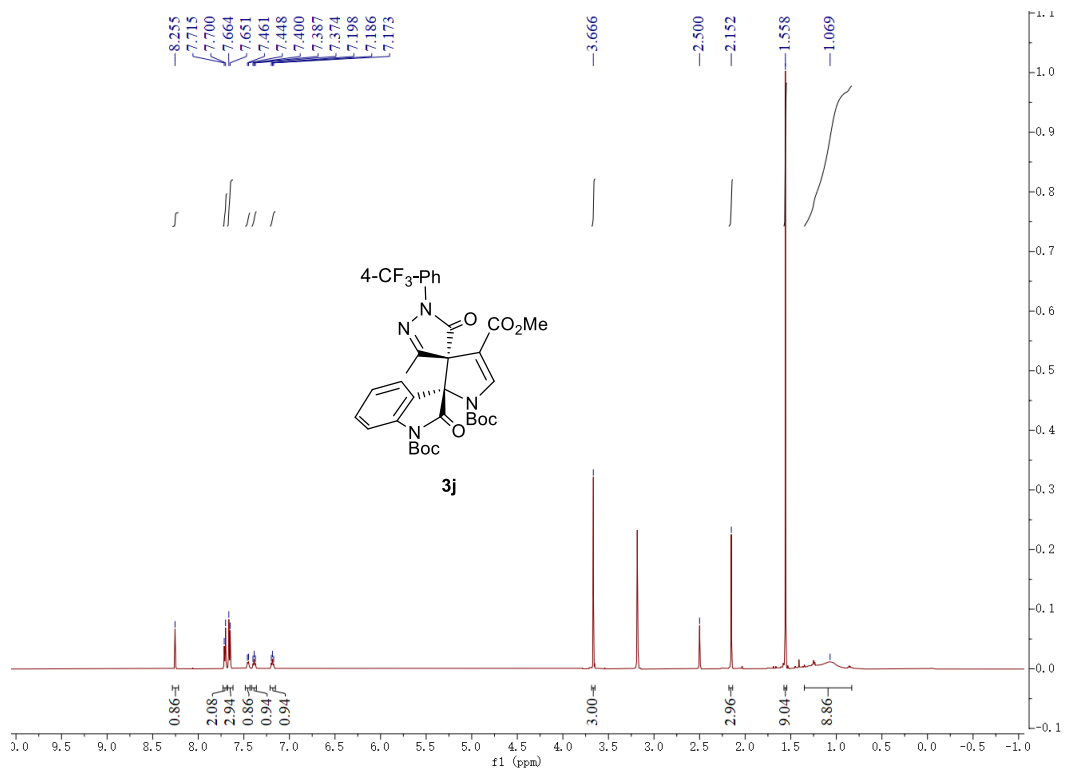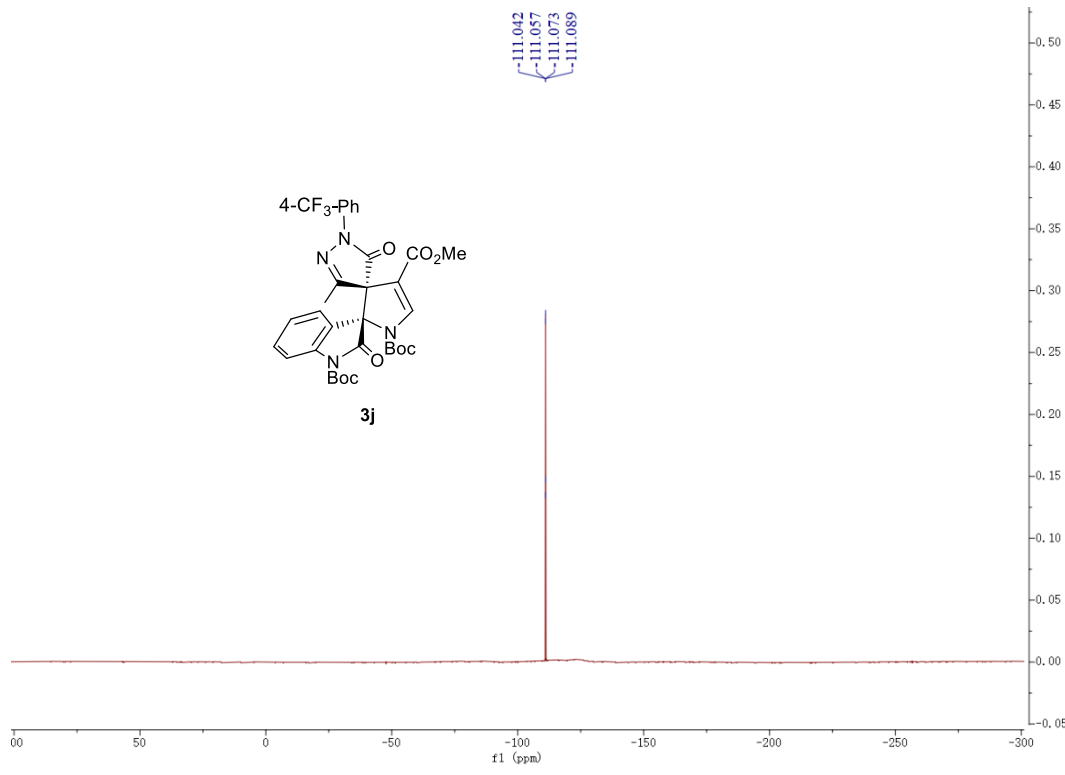

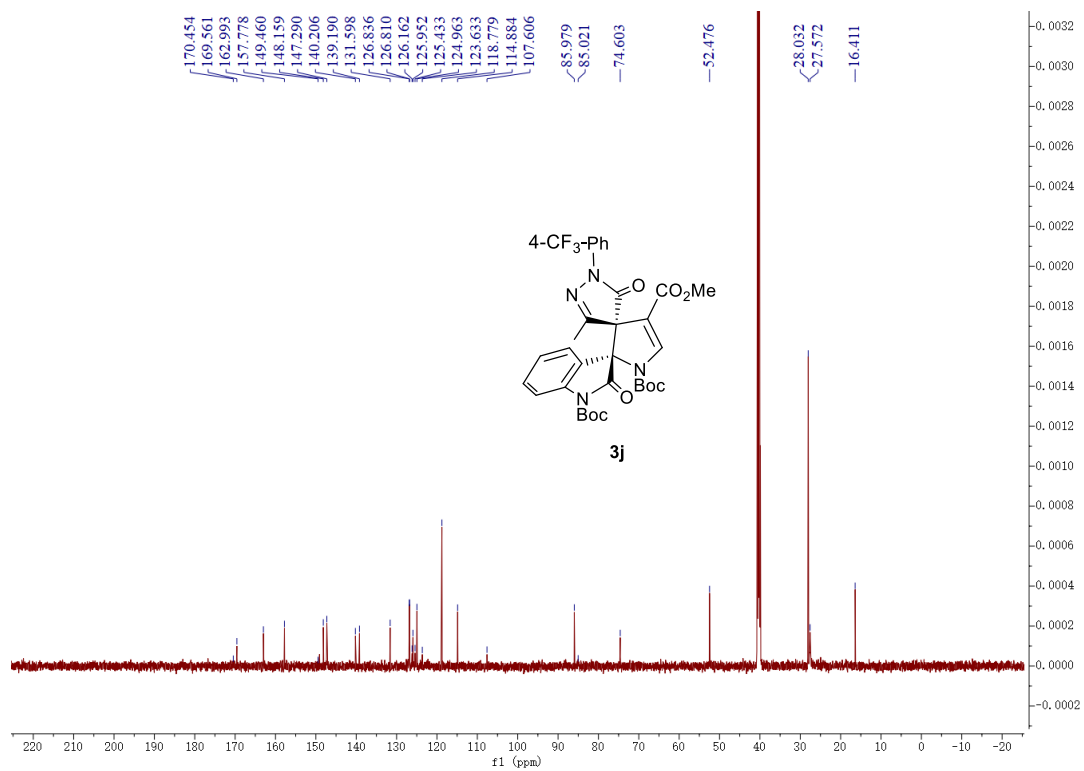

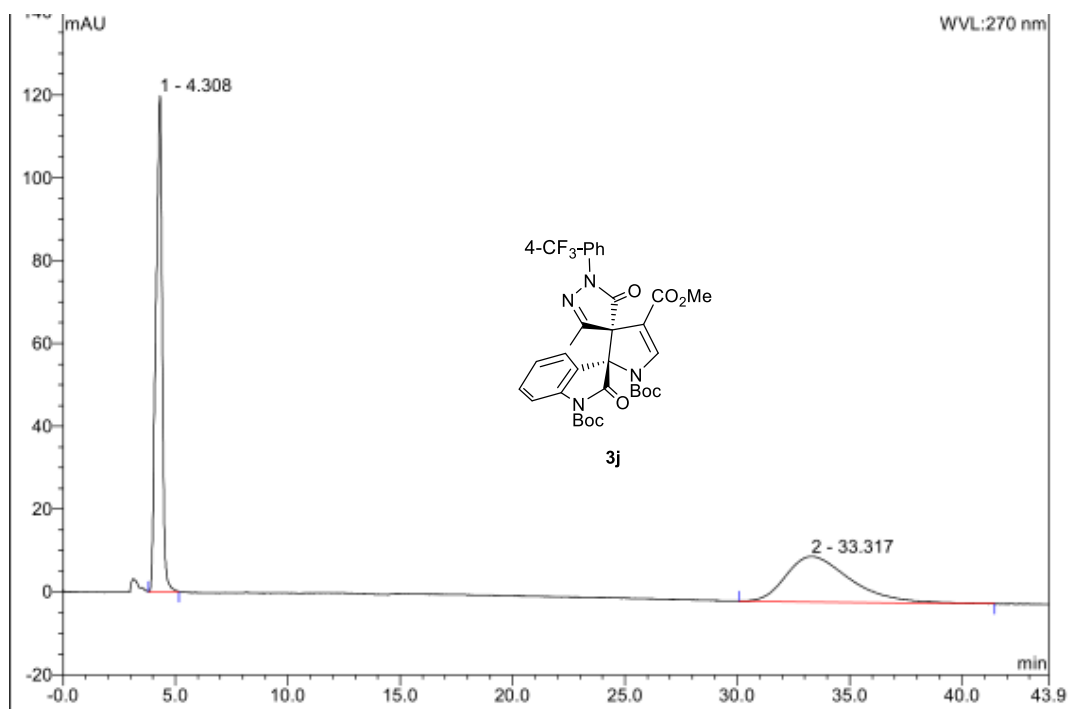

| No.           | Ret.Time<br>min | Peak Name | Height<br>mAU | Area<br>mAU*min | Rel.Area<br>% | Amount | Type |
|---------------|-----------------|-----------|---------------|-----------------|---------------|--------|------|
| 1             | 4.31            | n.a.      | 119.746       | 38.747          | 51.56         | n.a.   | BMB  |
| 2             | 33.32           | n.a.      | 10.991        | 36.405          | 48.44         | n.a.   | BMB* |
| <b>Total:</b> |                 |           | 130.738       | 75.152          | 100.00        | 0.000  |      |

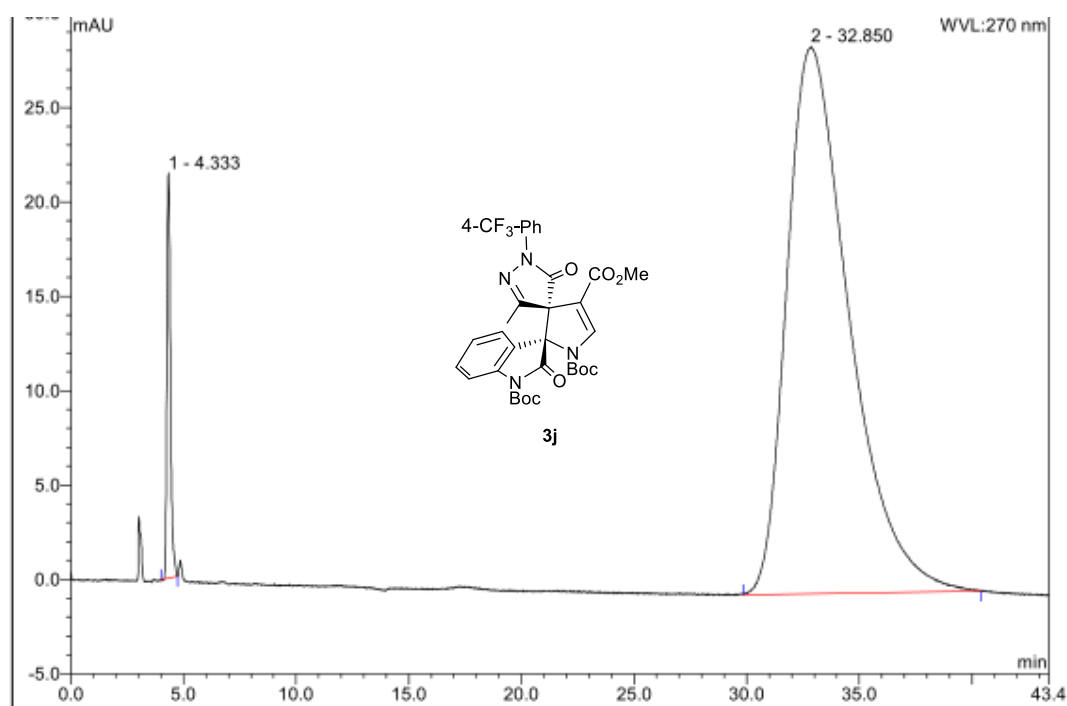

| No.           | Ret.Time<br>min | Peak Name | Height<br>mAU | Area<br>mAU*min | Rel.Area<br>% | Amount | Type |
|---------------|-----------------|-----------|---------------|-----------------|---------------|--------|------|
| 1             | 4.33            | n.a.      | 21.474        | 3.953           | 4.08          | n.a.   | BMB* |
| 2             | 32.85           | n.a.      | 28.995        | 92.923          | 95.92         | n.a.   | BMB* |
| <b>Total:</b> |                 |           | 50.469        | 96.875          | 100.00        | 0.000  |      |

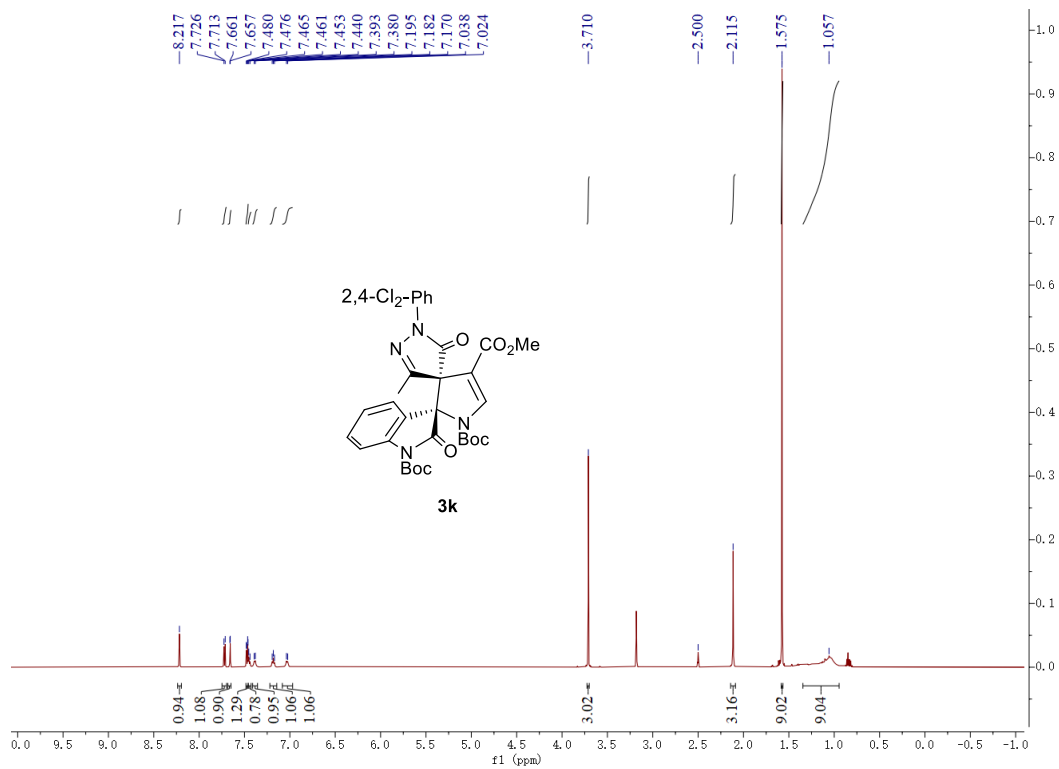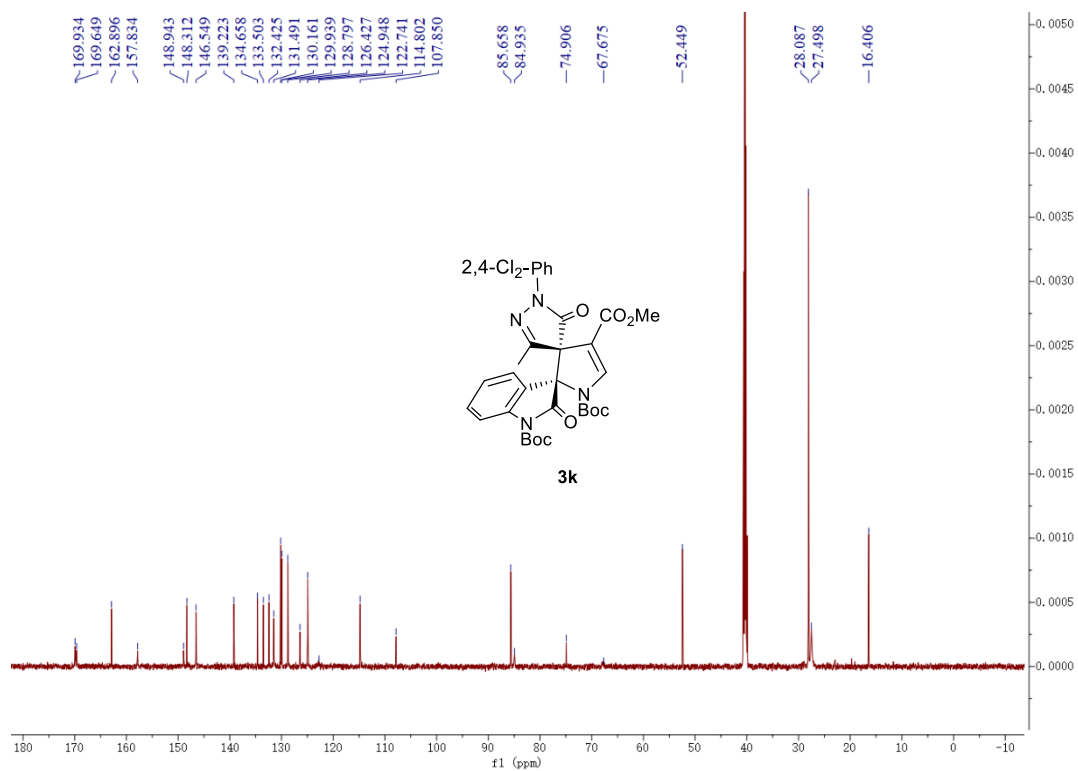



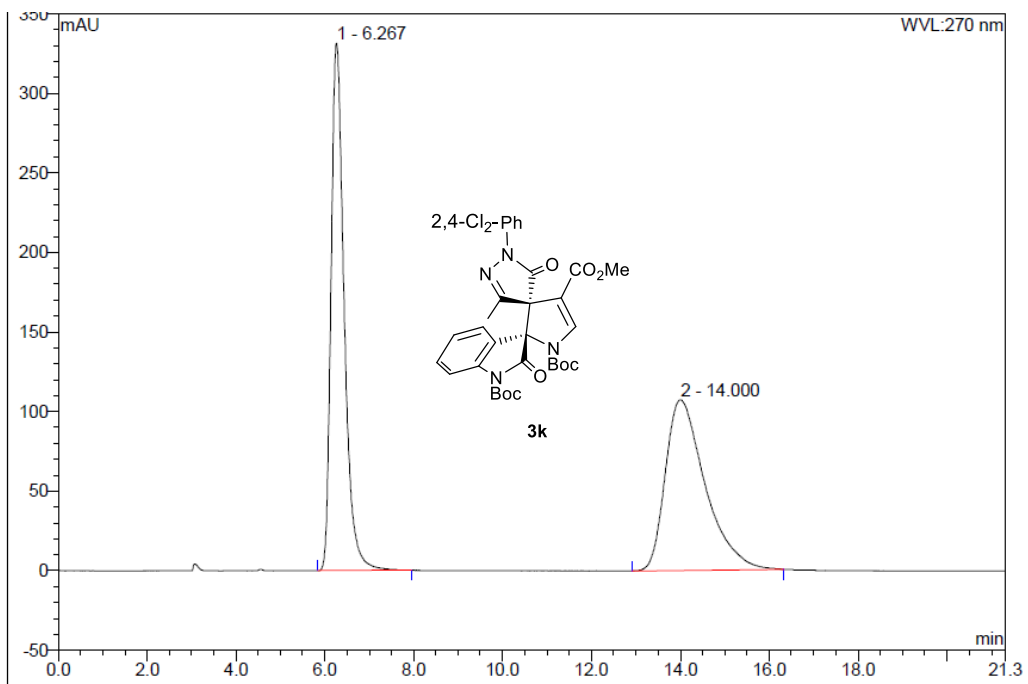

| No.           | Ret.Time min | Peak Name | Height mAU | Area mAU*min | Rel.Area % | Amount | Type |
|---------------|--------------|-----------|------------|--------------|------------|--------|------|
| 1             | 6.27         | n.a.      | 331.260    | 113.142      | 50.47      | n.a.   | BMB  |
| 2             | 14.00        | n.a.      | 107.190    | 111.016      | 49.53      | n.a.   | BMB  |
| <b>Total:</b> |              |           | 438.450    | 224.158      | 100.00     | 0.000  |      |

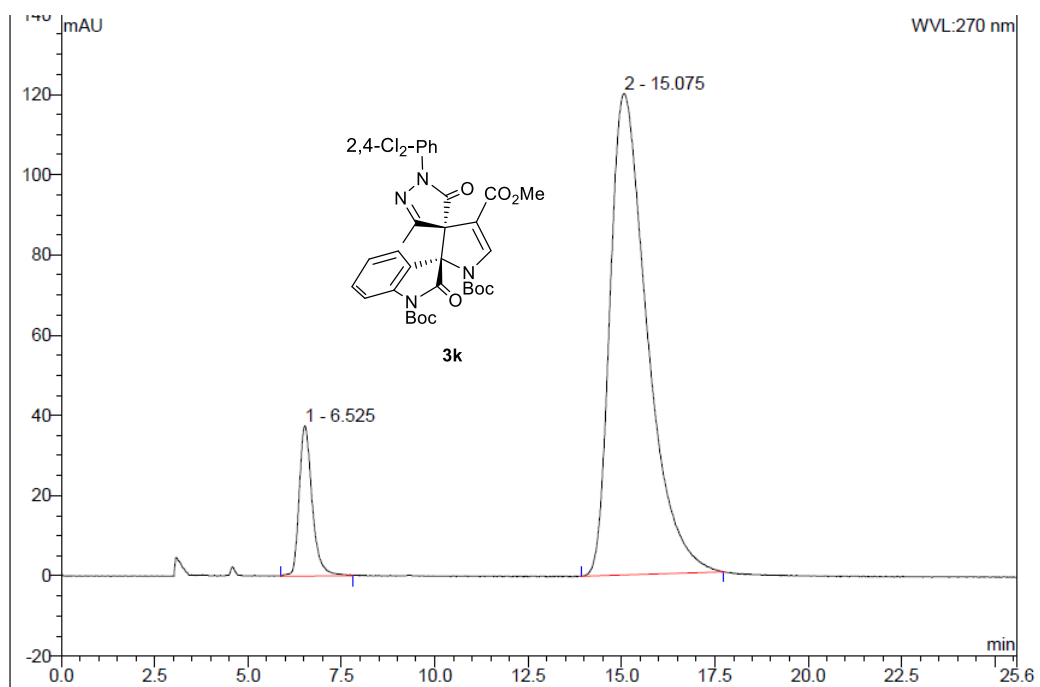

| No.           | Ret.Time min | Peak Name | Height mAU | Area mAU*min | Rel.Area % | Amount | Type |
|---------------|--------------|-----------|------------|--------------|------------|--------|------|
| 1             | 6.53         | n.a.      | 37.441     | 15.135       | 9.87       | n.a.   | BMB  |
| 2             | 15.08        | n.a.      | 119.958    | 138.219      | 90.13      | n.a.   | BMB  |
| <b>Total:</b> |              |           | 157.399    | 153.354      | 100.00     | 0.000  |      |

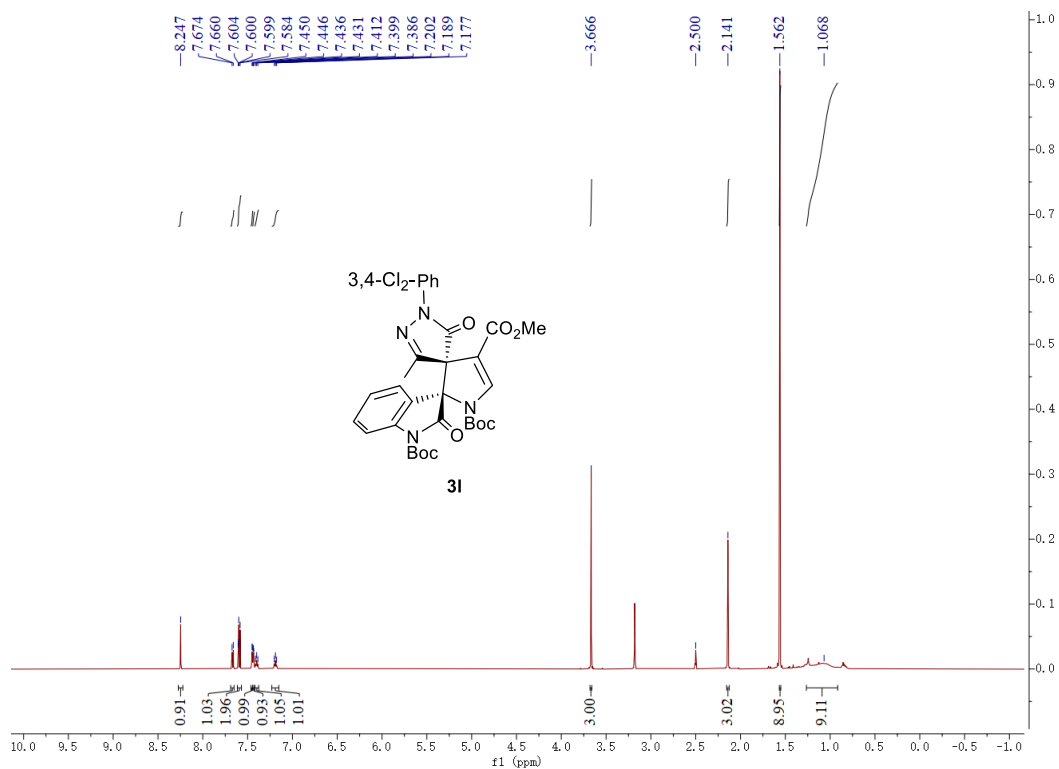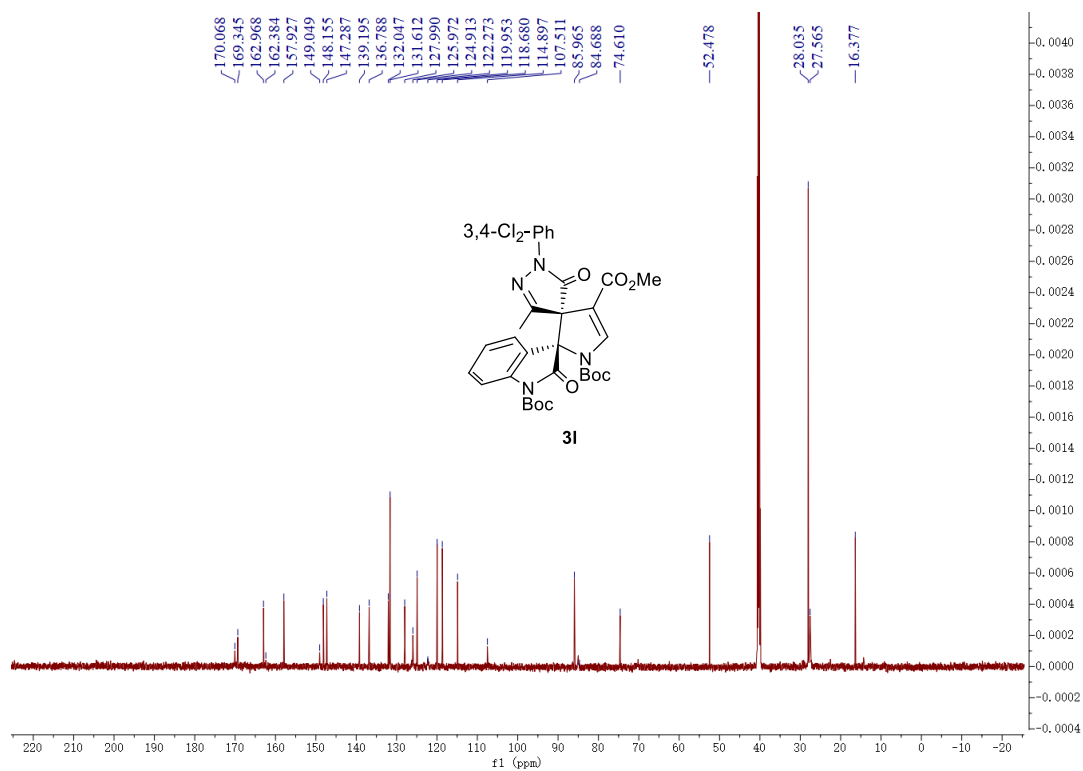

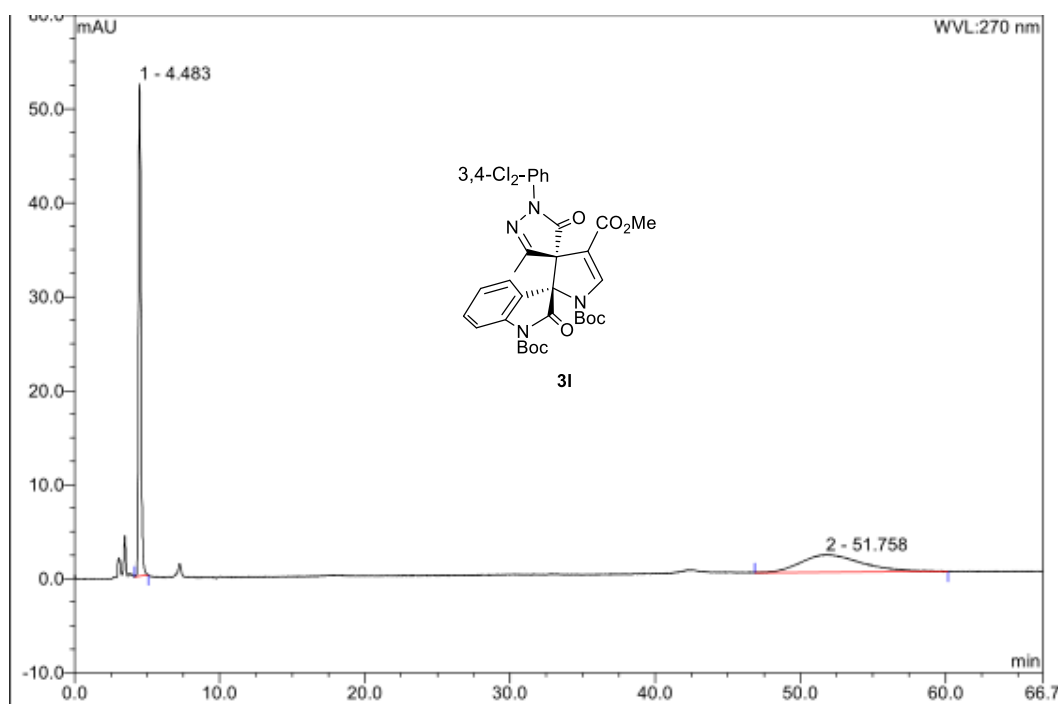

| No.           | Ret.Time<br>min | Peak Name | Height<br>mAU | Area<br>mAU*min | Rel.Area<br>% | Amount | Type |
|---------------|-----------------|-----------|---------------|-----------------|---------------|--------|------|
| 1             | 4.48            | n.a.      | 52.366        | 9.740           | 50.91         | n.a.   | BMB* |
| 2             | 51.76           | n.a.      | 1.896         | 9.390           | 49.09         | n.a.   | BMB* |
| <b>Total:</b> |                 |           | 54.262        | 19.130          | 100.00        | 0.000  |      |

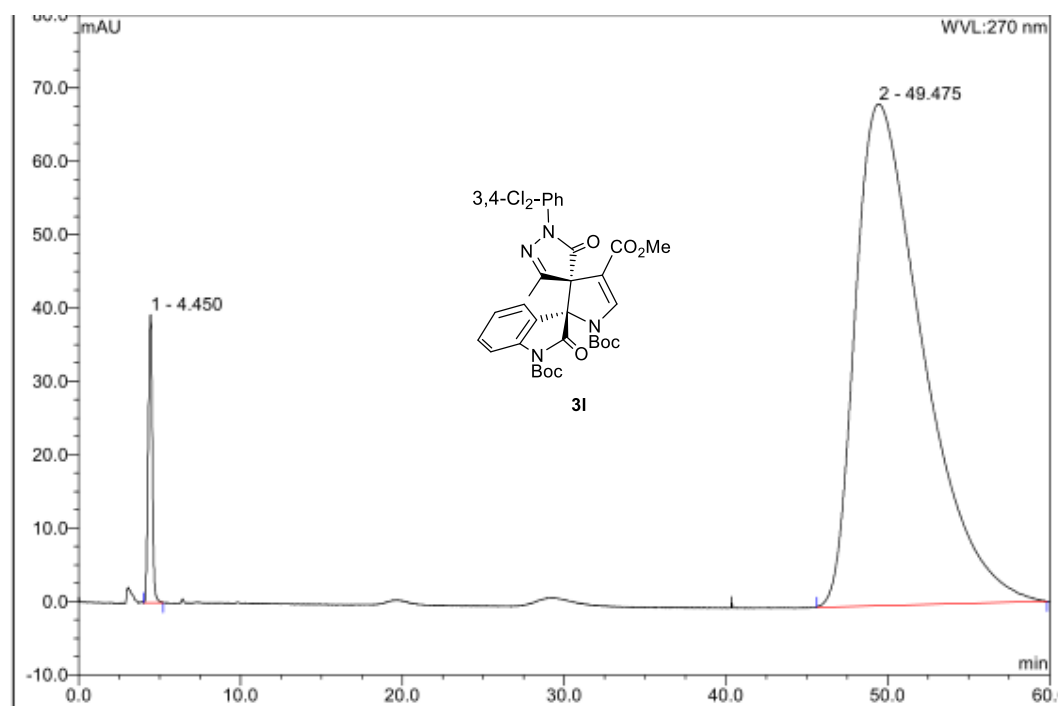

| No.           | Ret.Time<br>min | Peak Name | Height<br>mAU | Area<br>mAU*min | Rel.Area<br>% | Amount | Type |
|---------------|-----------------|-----------|---------------|-----------------|---------------|--------|------|
| 1             | 4.45            | n.a.      | 39.353        | 11.505          | 3.37          | n.a.   | BMB* |
| 2             | 49.48           | n.a.      | 68.401        | 330.331         | 96.63         | n.a.   | BMB* |
| <b>Total:</b> |                 |           | 107.754       | 341.836         | 100.00        | 0.000  |      |

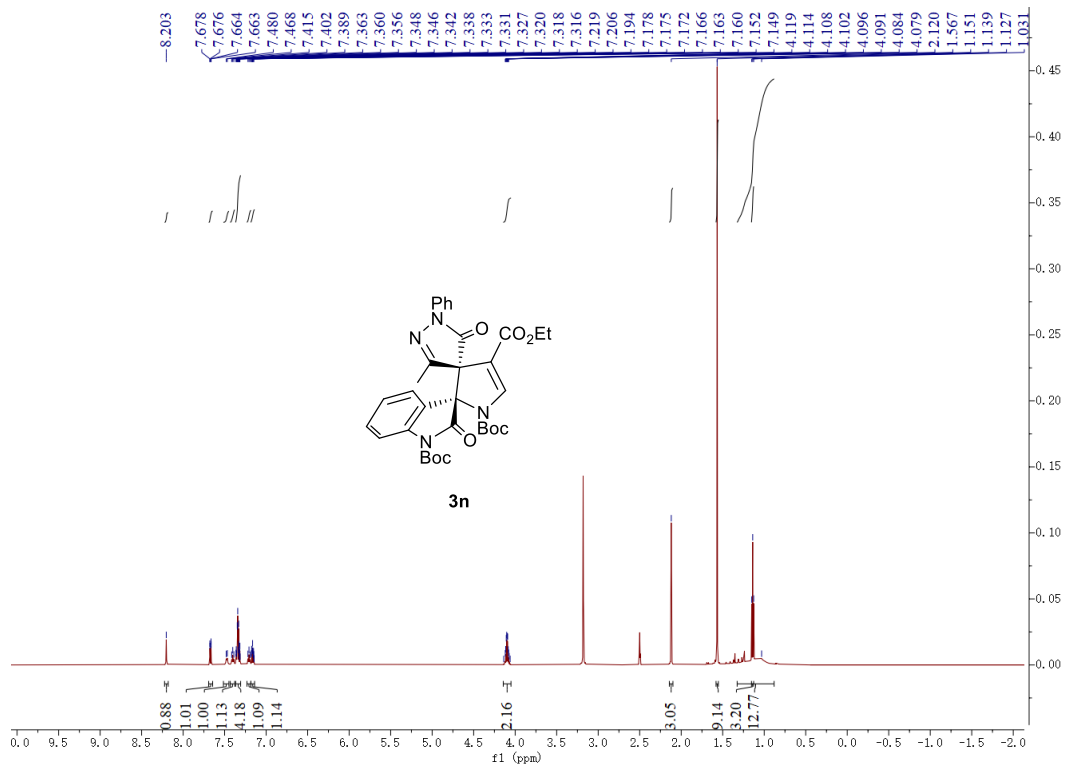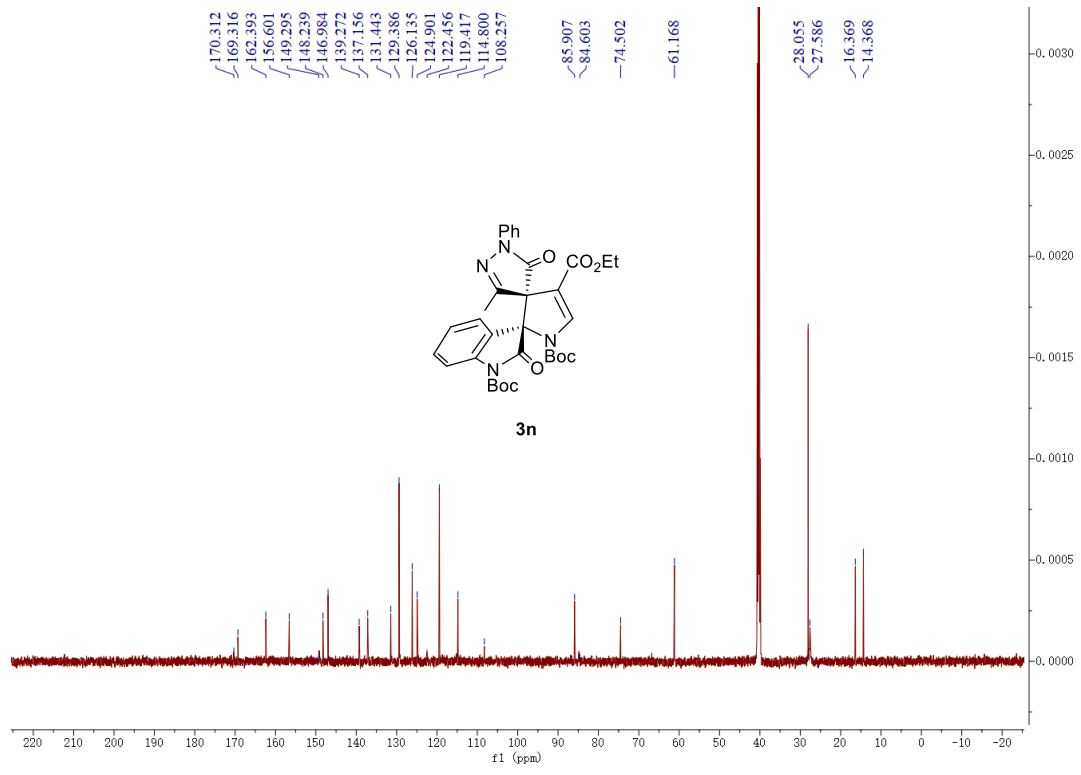

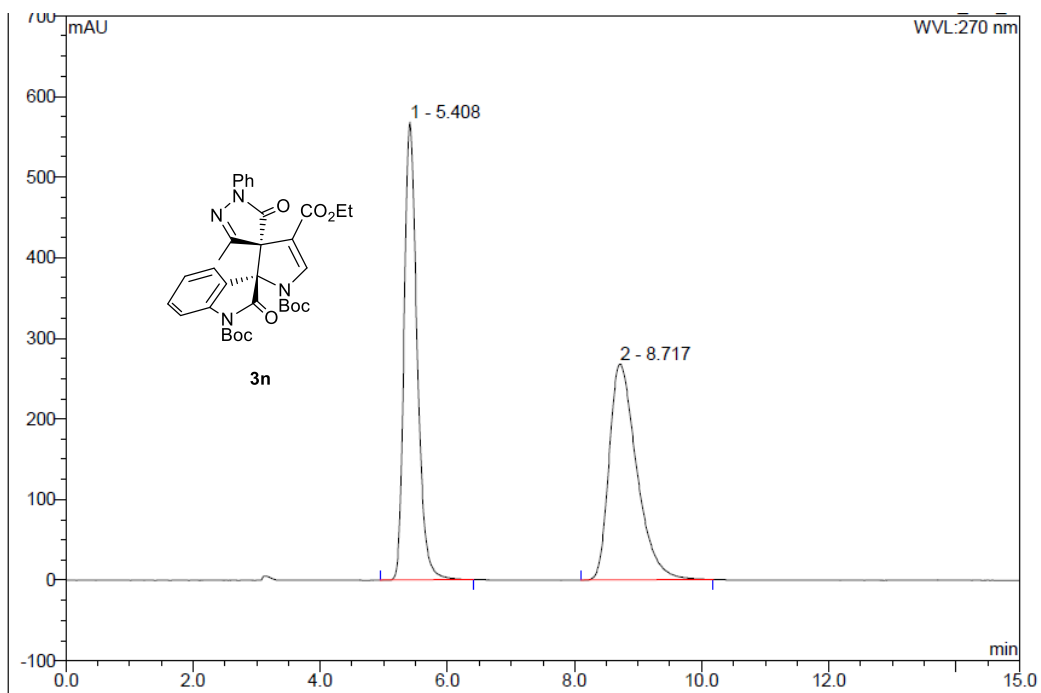

| No.           | Ret.Time min | Peak Name | Height mAU | Area mAU*min | Rel.Area % | Amount | Type |
|---------------|--------------|-----------|------------|--------------|------------|--------|------|
| 1             | 5.41         | n.a.      | 567.900    | 134.997      | 50.03      | n.a.   | BMB  |
| 2             | 8.72         | n.a.      | 267.937    | 134.824      | 49.97      | n.a.   | BMB  |
| <b>Total:</b> |              |           | 835.837    | 269.820      | 100.00     | 0.000  |      |

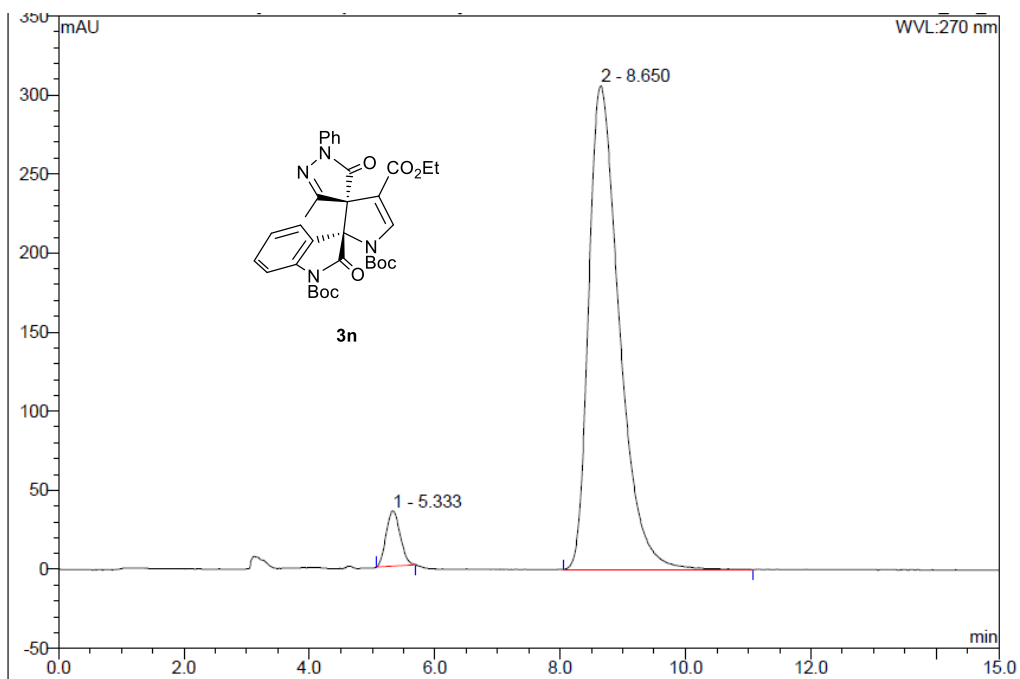

| No.           | Ret.Time min | Peak Name | Height mAU | Area mAU*min | Rel.Area % | Amount | Type |
|---------------|--------------|-----------|------------|--------------|------------|--------|------|
| 1             | 5.33         | n.a.      | 34.902     | 9.082        | 5.00       | n.a.   | BMB* |
| 2             | 8.65         | n.a.      | 305.654    | 172.625      | 95.00      | n.a.   | BMB* |
| <b>Total:</b> |              |           | 340.556    | 181.707      | 100.00     | 0.000  |      |

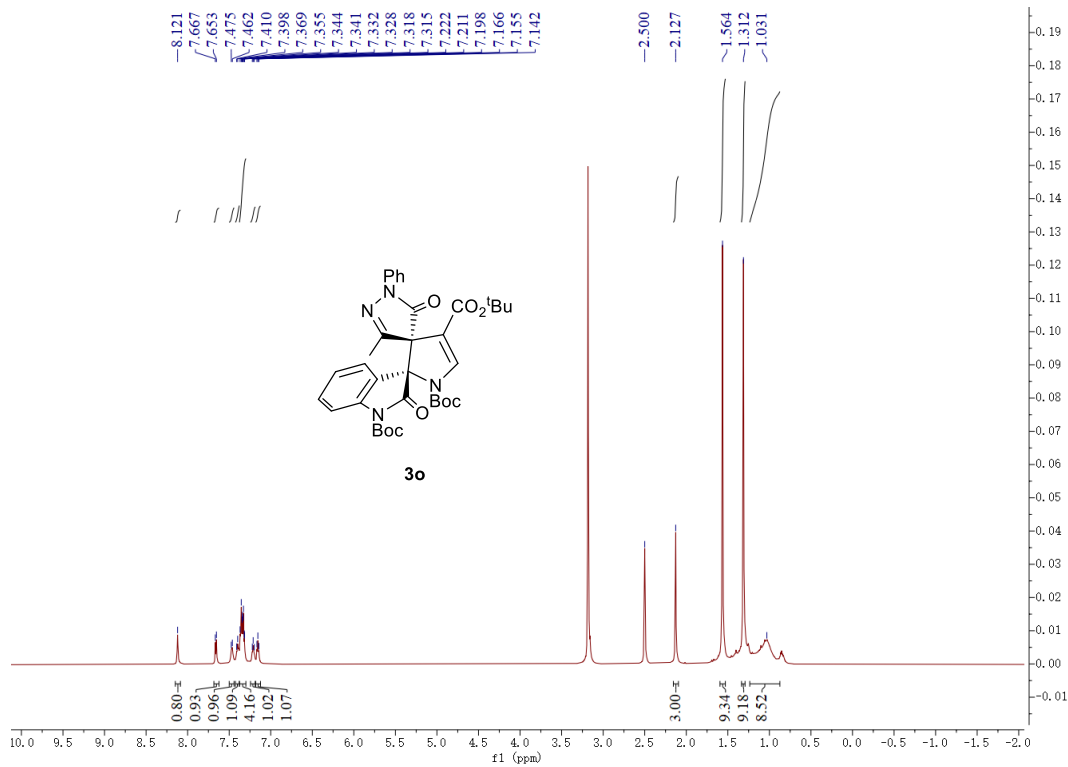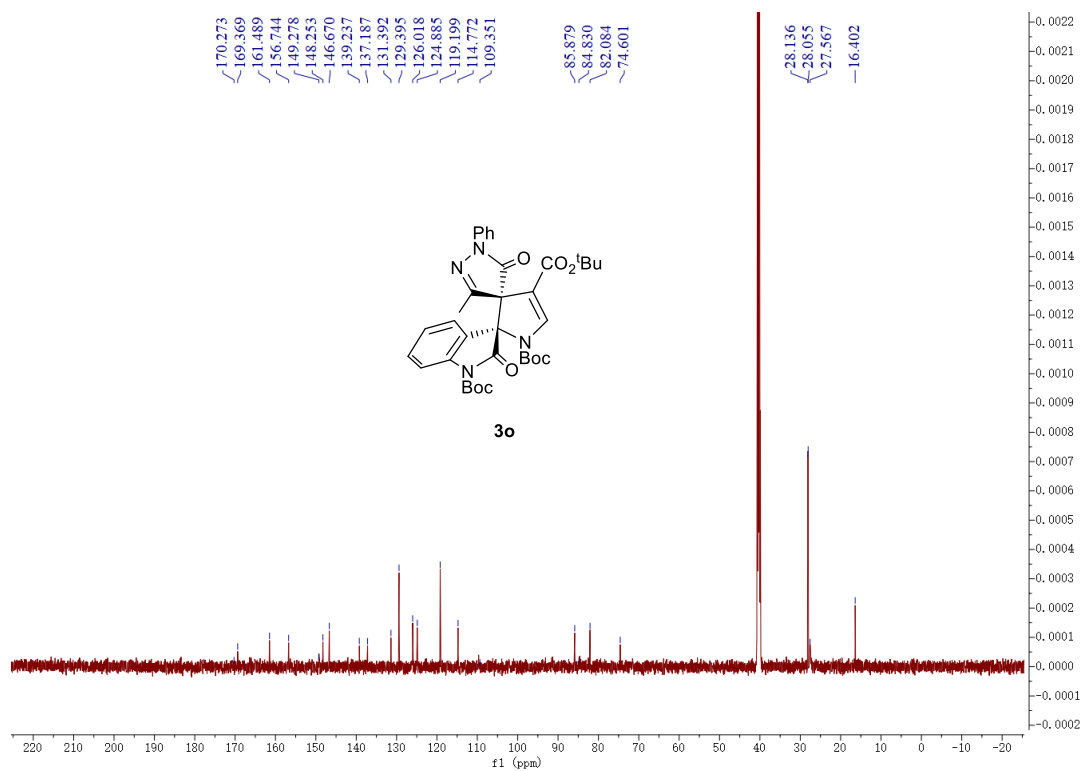

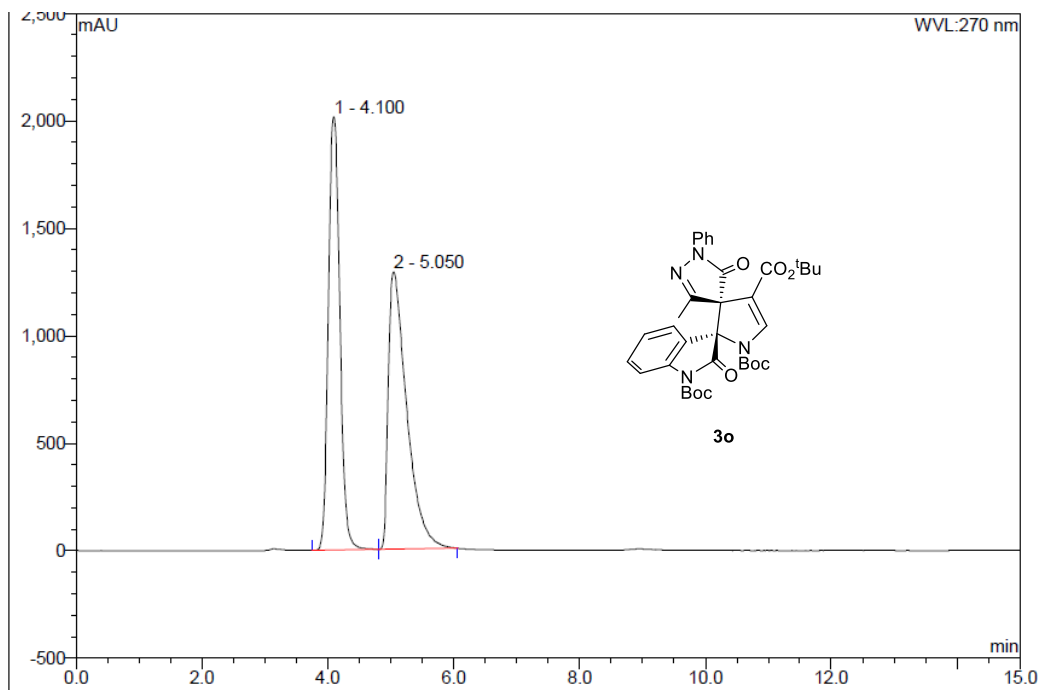

| No.           | Ret.Time<br>min | Peak Name | Height<br>mAU | Area<br>mAU*min | Rel.Area<br>% | Amount | Type |
|---------------|-----------------|-----------|---------------|-----------------|---------------|--------|------|
| 1             | 4.10            | n.a.      | 2017.846      | 428.348         | 49.43         | n.a.   | BM * |
| 2             | 5.05            | n.a.      | 1290.814      | 438.288         | 50.57         | n.a.   | MB*  |
| <b>Total:</b> |                 |           | 3308.660      | 866.636         | 100.00        | 0.000  |      |

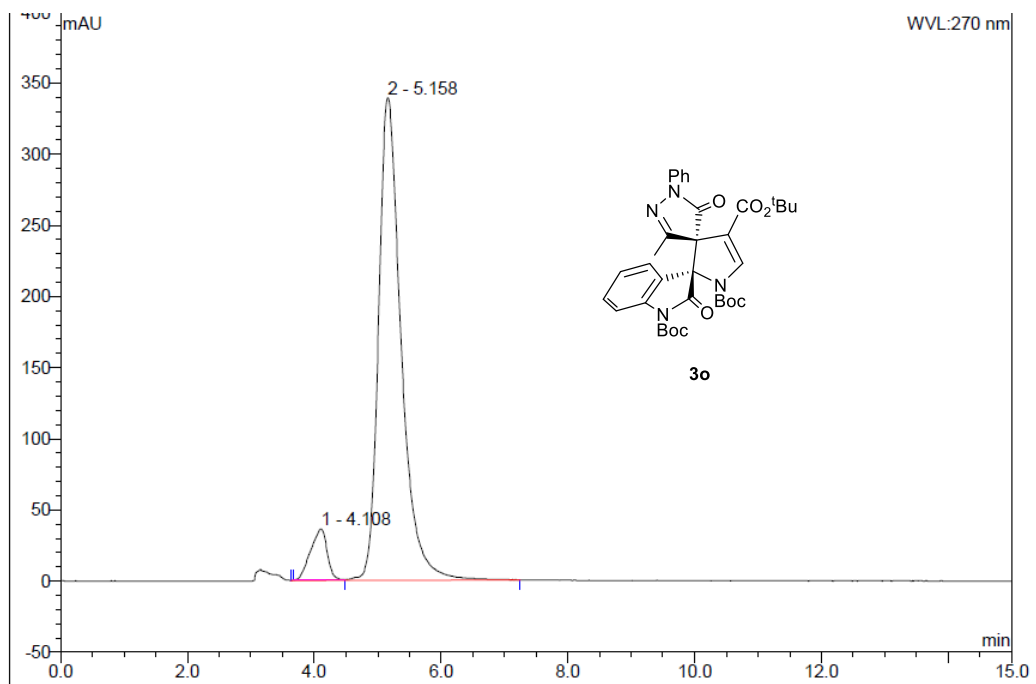

| No.           | Ret.Time<br>min | Peak Name | Height<br>mAU | Area<br>mAU*min | Rel.Area<br>% | Amount | Type |
|---------------|-----------------|-----------|---------------|-----------------|---------------|--------|------|
| 1             | 4.11            | n.a.      | 35.734        | 10.849          | 7.18          | n.a.   | Ru   |
| 2             | 5.16            | n.a.      | 339.395       | 140.308         | 92.82         | n.a.   | BMB  |
| <b>Total:</b> |                 |           | 375.128       | 151.157         | 100.00        | 0.000  |      |

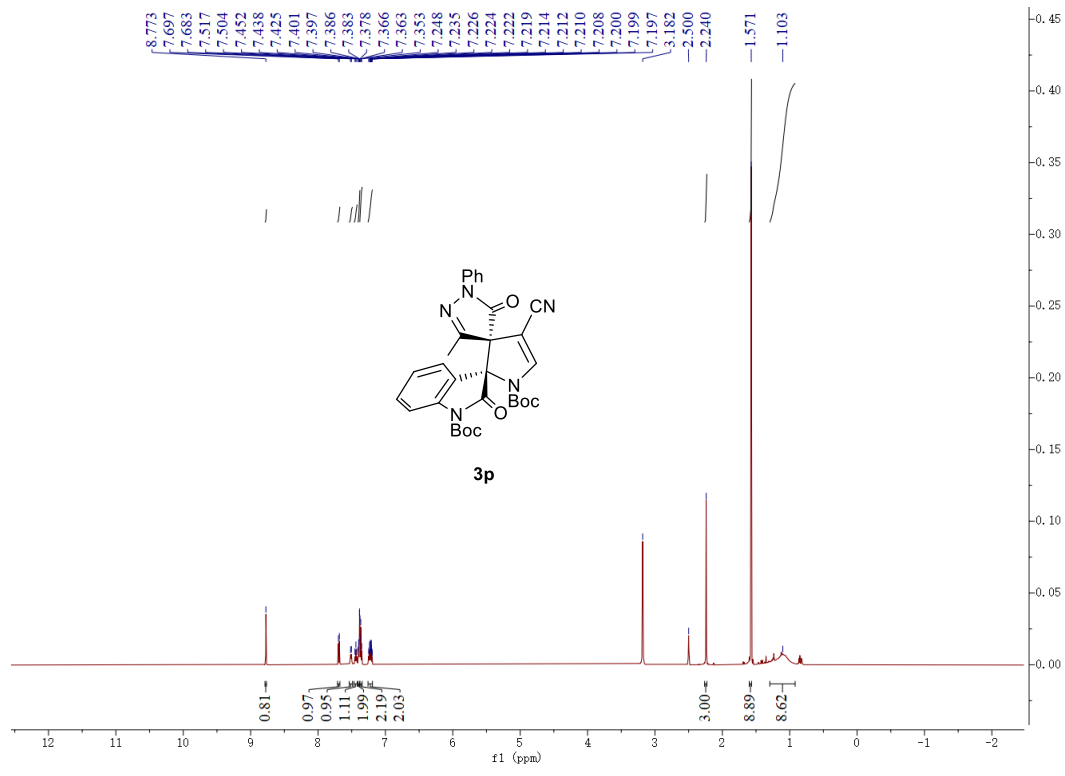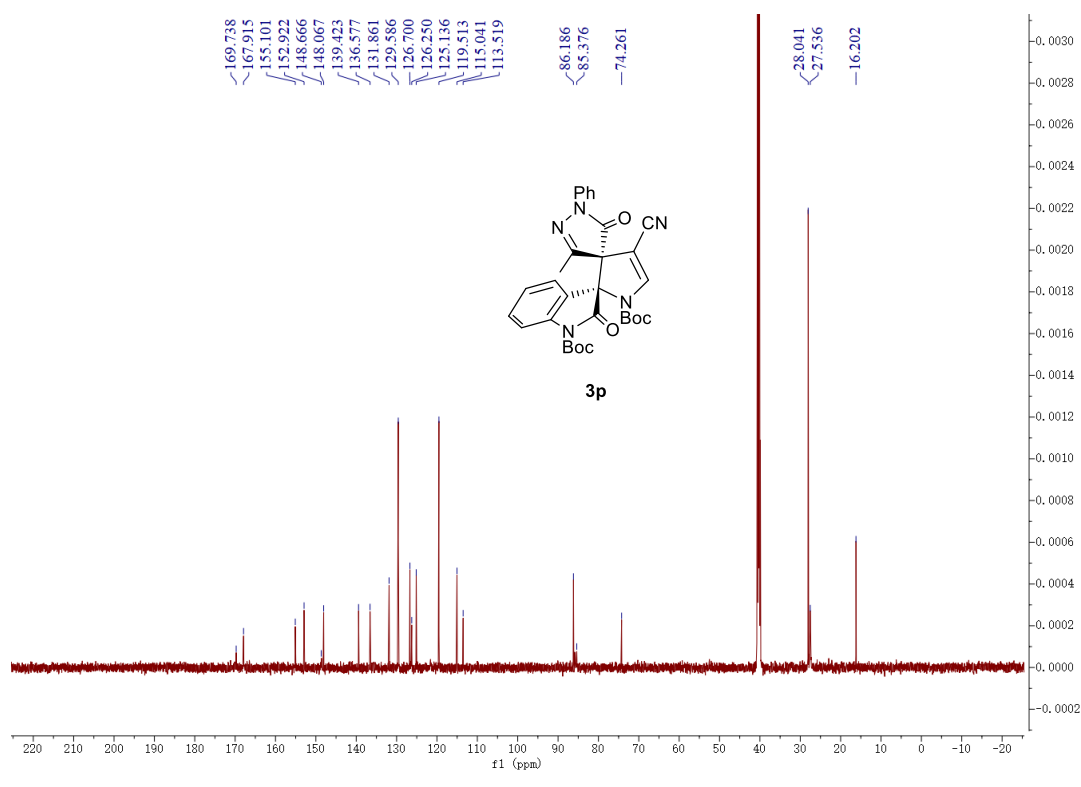



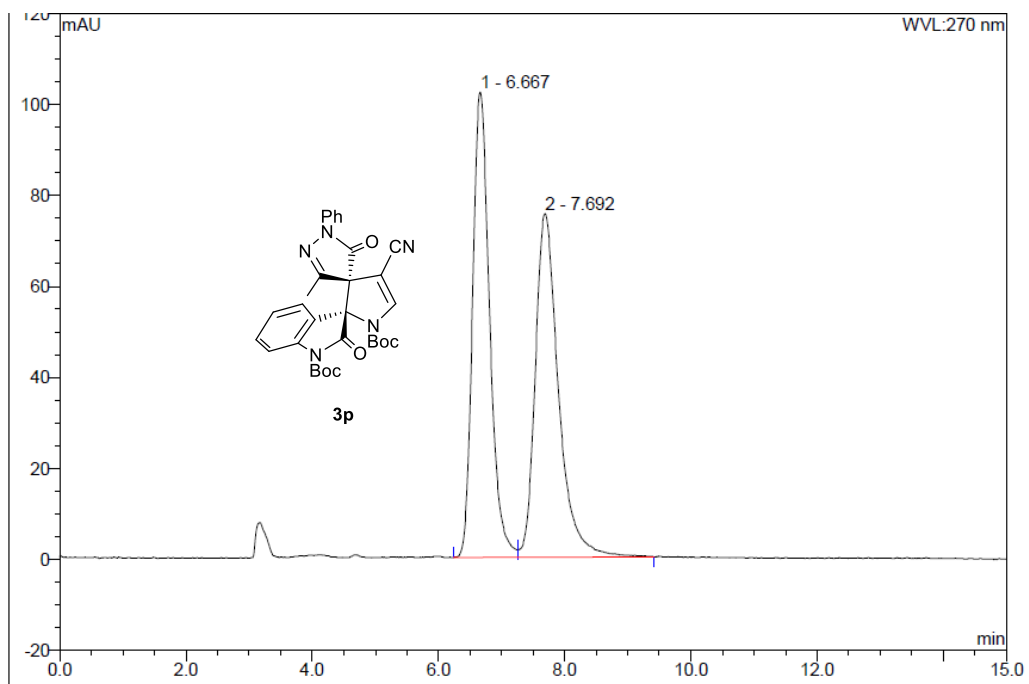

| No.           | Ret.Time<br>min | Peak Name | Height<br>mAU | Area<br>mAU*min | Rel.Area<br>% | Amount | Type |
|---------------|-----------------|-----------|---------------|-----------------|---------------|--------|------|
| 1             | 6.67            | n.a.      | 102.246       | 31.971          | 49.75         | n.a.   | BM   |
| 2             | 7.69            | n.a.      | 75.549        | 32.287          | 50.25         | n.a.   | MB   |
| <b>Total:</b> |                 |           | 177.795       | 64.258          | 100.00        | 0.000  |      |

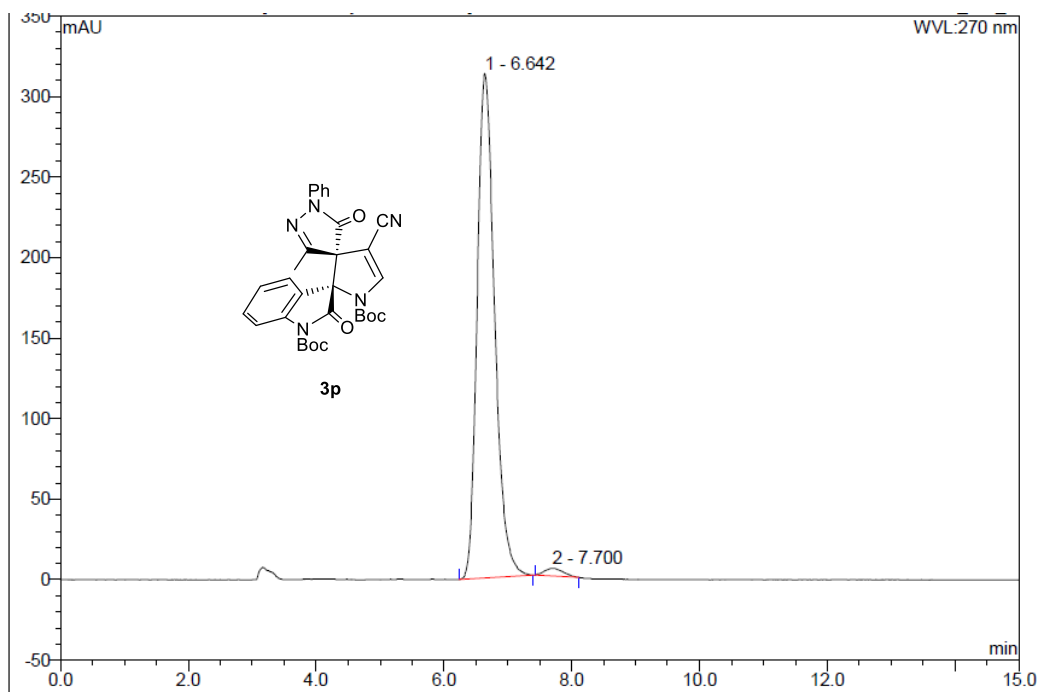

| No.           | Ret.Time<br>min | Peak Name | Height<br>mAU | Area<br>mAU*min | Rel.Area<br>% | Amount | Type |
|---------------|-----------------|-----------|---------------|-----------------|---------------|--------|------|
| 1             | 6.64            | n.a.      | 313.052       | 98.808          | 98.38         | n.a.   | BMB  |
| 2             | 7.70            | n.a.      | 4.772         | 1.630           | 1.62          | n.a.   | BMB* |
| <b>Total:</b> |                 |           | 317.823       | 100.438         | 100.00        | 0.000  |      |

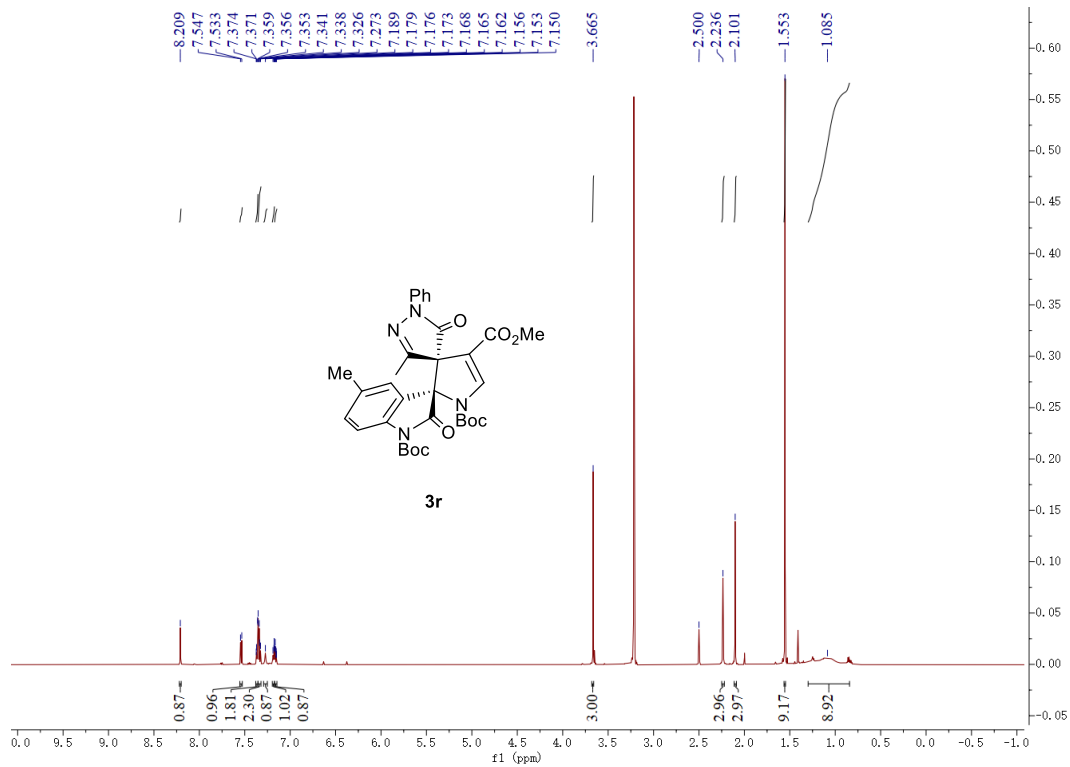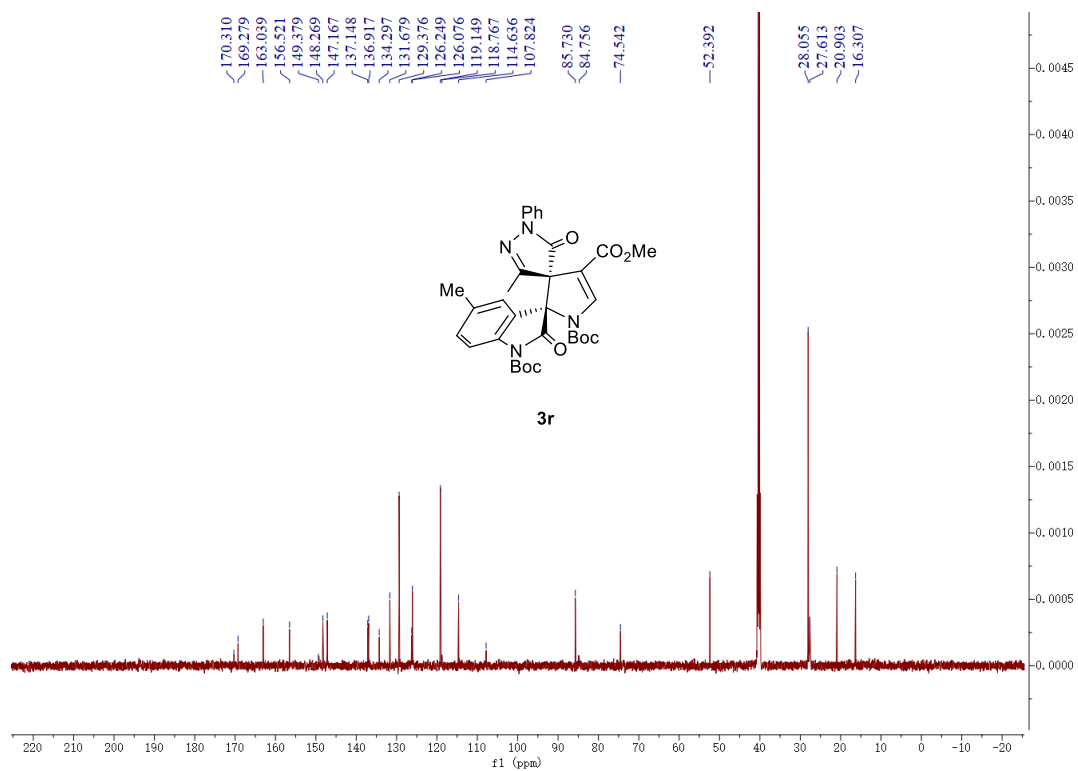

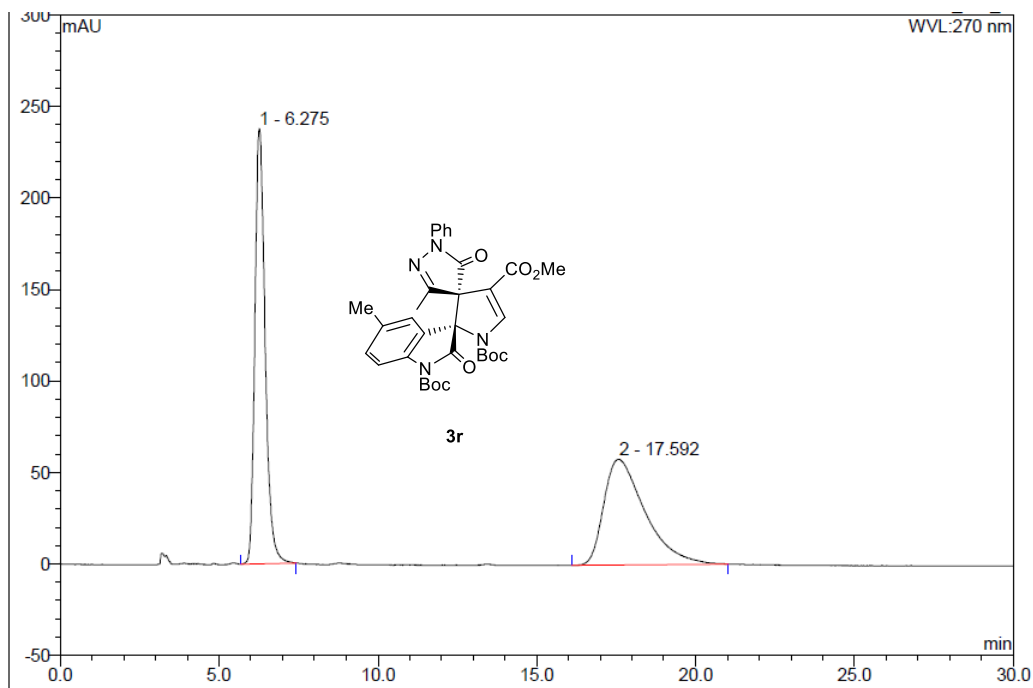

| No.           | Ret.Time min | Peak Name | Height mAU | Area mAU*min | Rel.Area % | Amount | Type |
|---------------|--------------|-----------|------------|--------------|------------|--------|------|
| 1             | 6.28         | n.a.      | 237.891    | 88.944       | 50.57      | n.a.   | BMB  |
| 2             | 17.59        | n.a.      | 57.778     | 86.946       | 49.43      | n.a.   | BMB  |
| <b>Total:</b> |              |           | 295.669    | 175.890      | 100.00     | 0.000  |      |

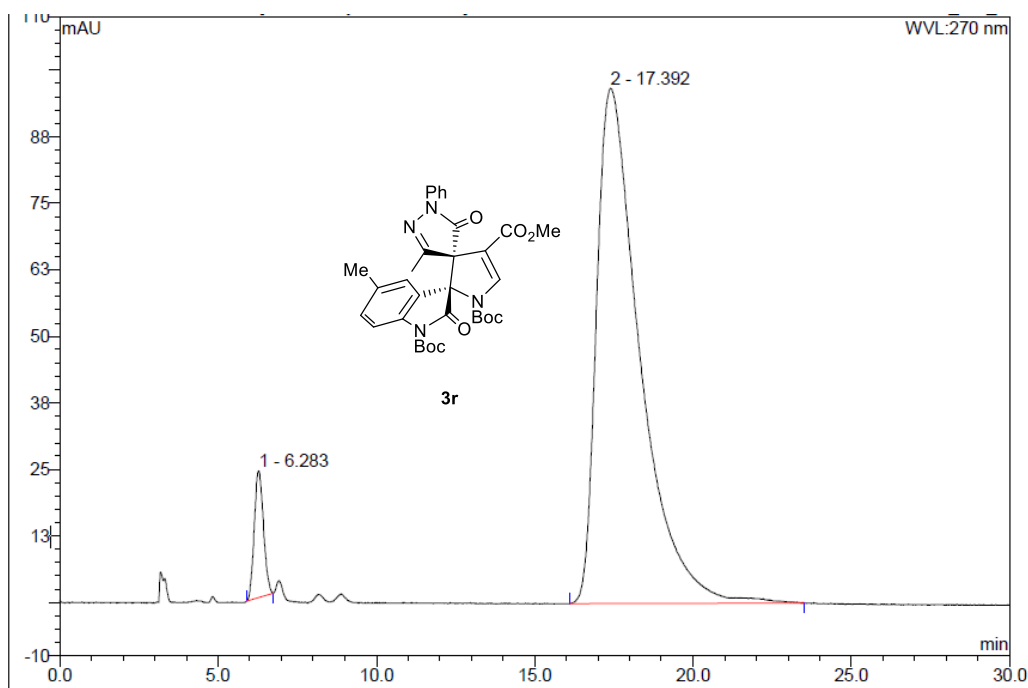

| No.           | Ret.Time min | Peak Name | Height mAU | Area mAU*min | Rel.Area % | Amount | Type |
|---------------|--------------|-----------|------------|--------------|------------|--------|------|
| 1             | 6.28         | n.a.      | 23.788     | 8.029        | 5.00       | n.a.   | BMB  |
| 2             | 17.39        | n.a.      | 96.726     | 152.666      | 95.00      | n.a.   | BMB* |
| <b>Total:</b> |              |           | 120.514    | 160.695      | 100.00     | 0.000  |      |

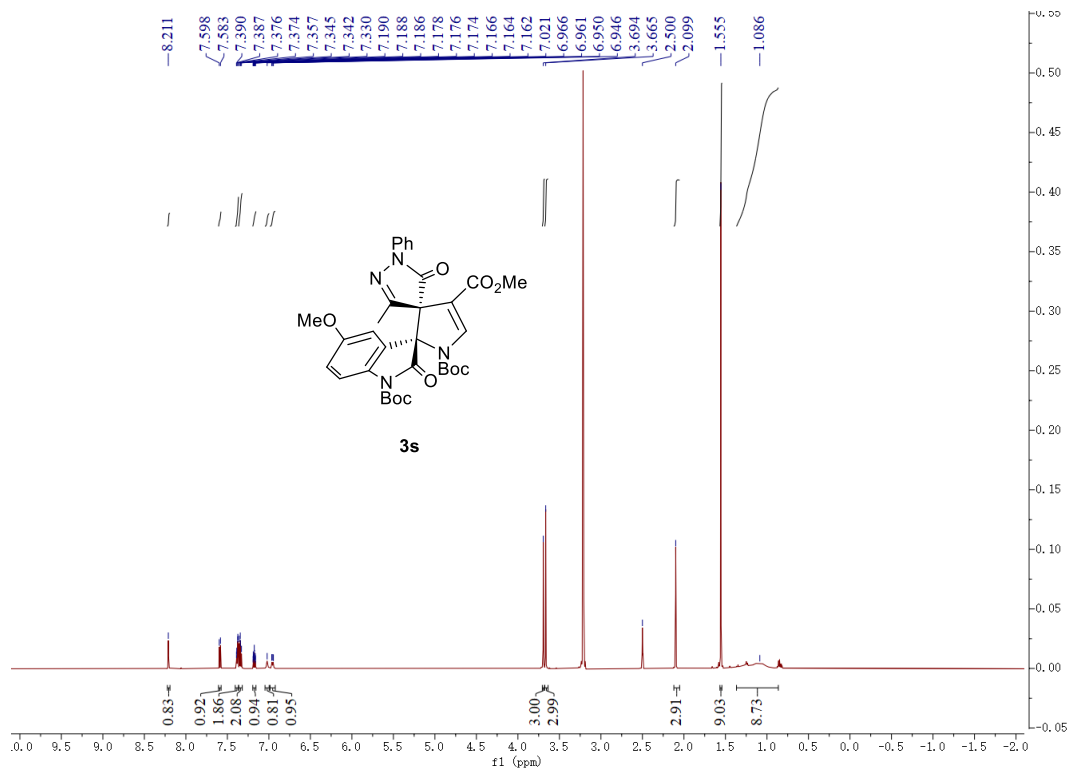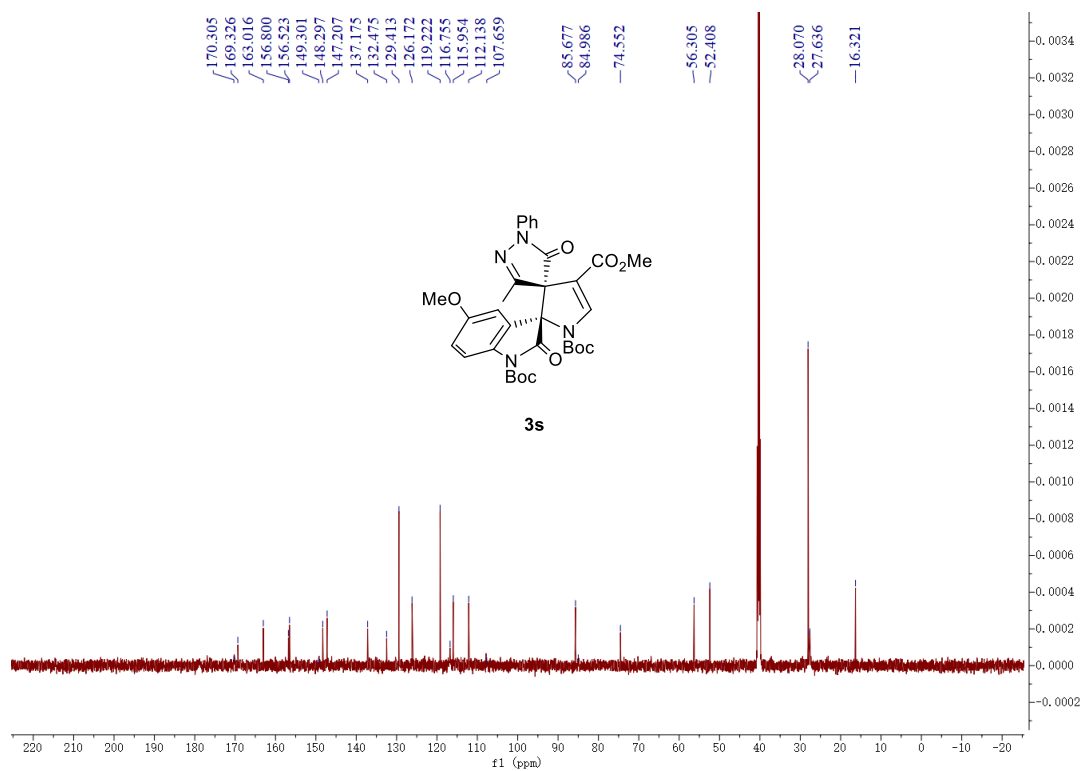

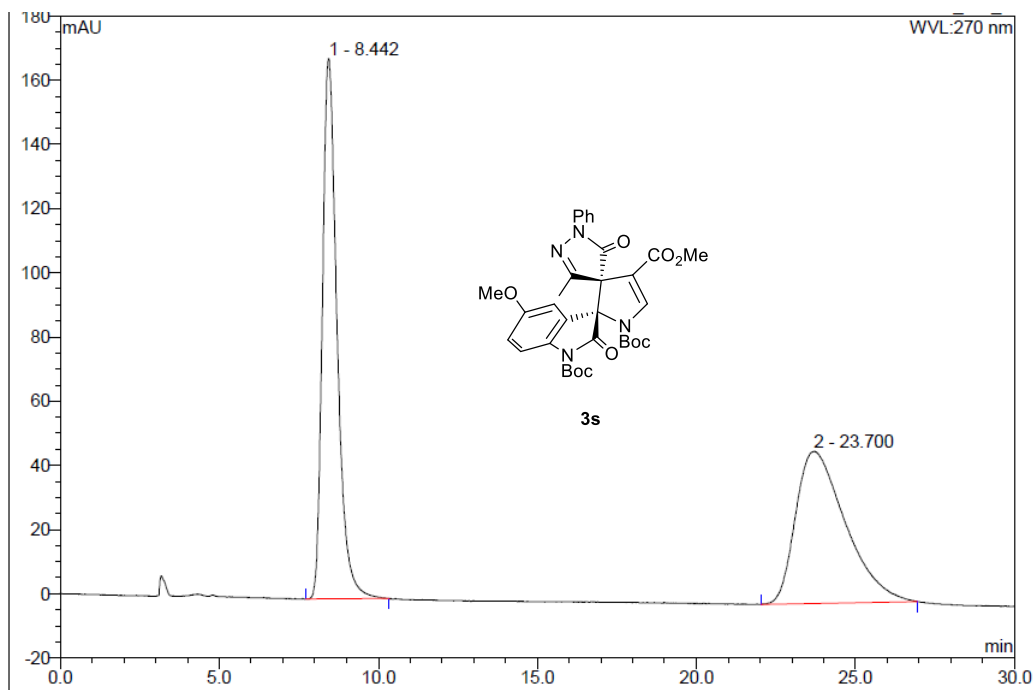

| No.           | Ret.Time<br>min | Peak Name | Height<br>mAU | Area<br>mAU*min | Rel.Area<br>% | Amount | Type |
|---------------|-----------------|-----------|---------------|-----------------|---------------|--------|------|
| 1             | 8.44            | n.a.      | 168.399       | 89.876          | 51.10         | n.a.   | BMB  |
| 2             | 23.70           | n.a.      | 47.380        | 86.005          | 48.90         | n.a.   | BMB  |
| <b>Total:</b> |                 |           | 215.779       | 175.881         | 100.00        | 0.000  |      |

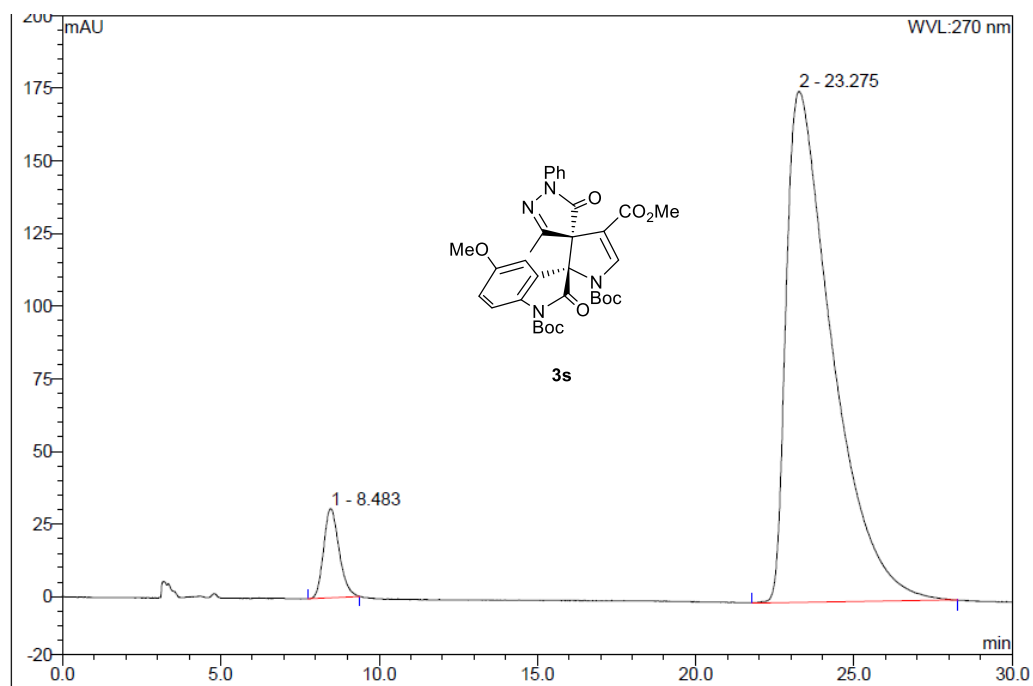

| No.           | Ret.Time<br>min | Peak Name | Height<br>mAU | Area<br>mAU*min | Rel.Area<br>% | Amount | Type |
|---------------|-----------------|-----------|---------------|-----------------|---------------|--------|------|
| 1             | 8.48            | n.a.      | 30.663        | 17.413          | 5.54          | n.a.   | BMB* |
| 2             | 23.28           | n.a.      | 175.808       | 296.723         | 94.46         | n.a.   | BMB* |
| <b>Total:</b> |                 |           | 206.471       | 314.136         | 100.00        | 0.000  |      |

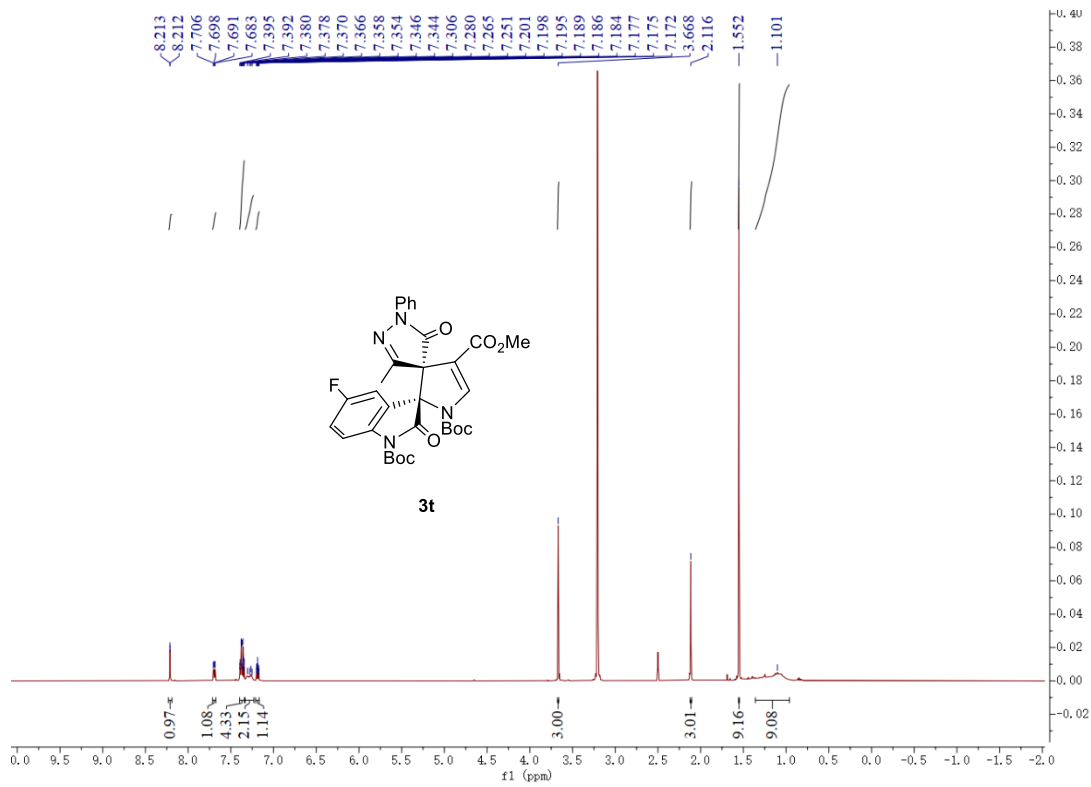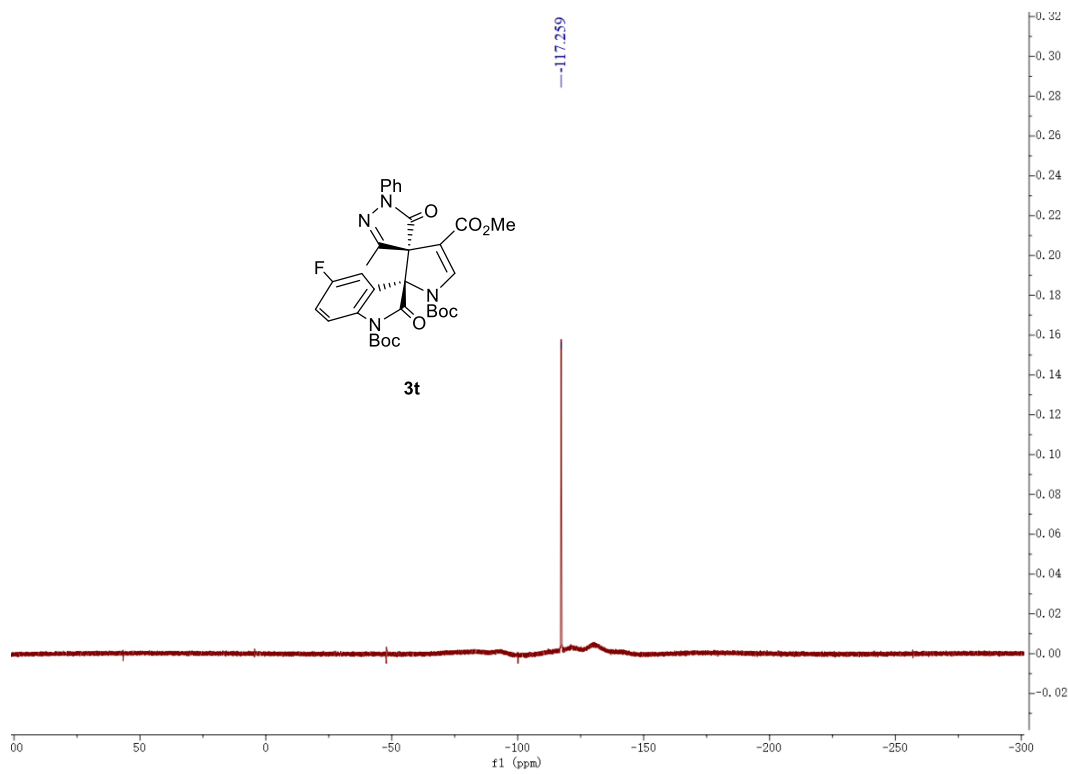

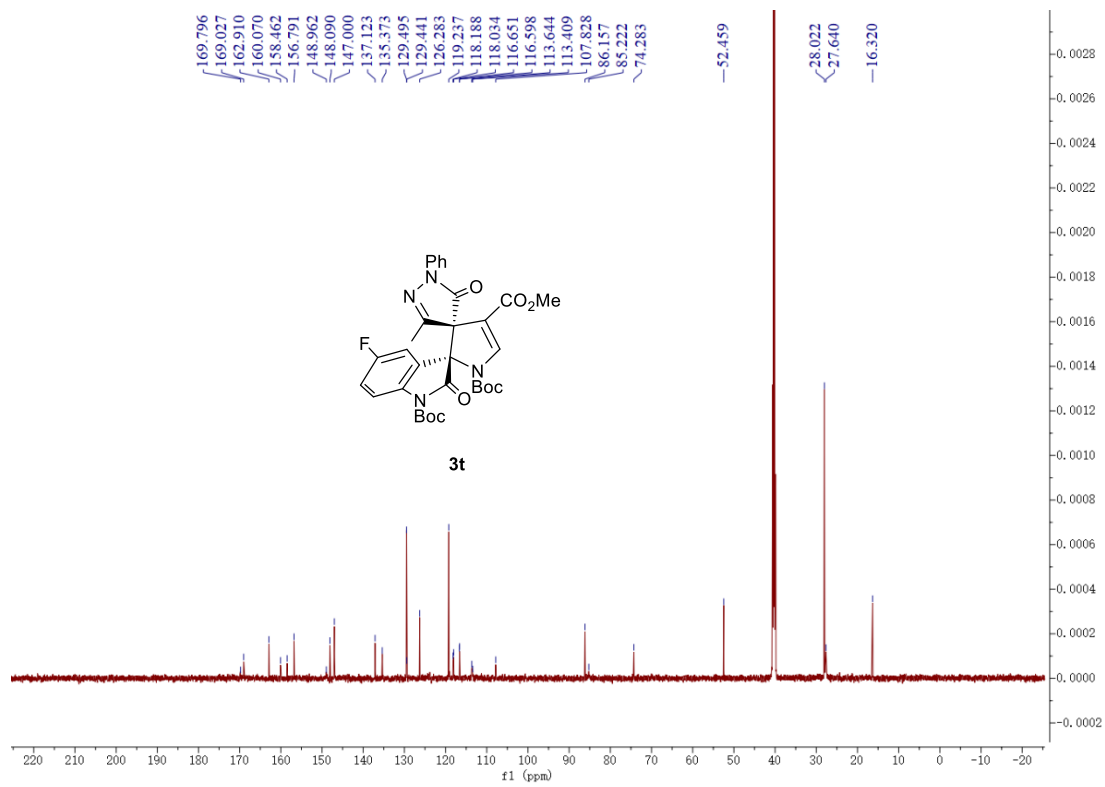

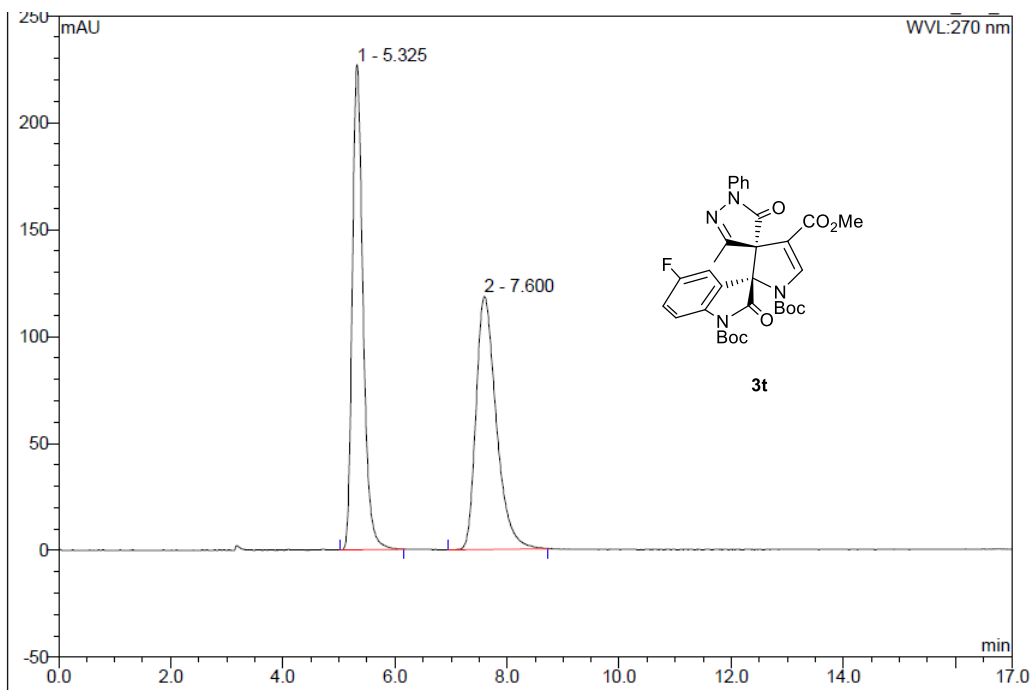

| No.           | Ret.Time min | Peak Name | Height mAU | Area mAU*min | Rel.Area % | Amount | Type |
|---------------|--------------|-----------|------------|--------------|------------|--------|------|
| 1             | 5.33         | n.a.      | 227.058    | 50.228       | 50.34      | n.a.   | BMB  |
| 2             | 7.60         | n.a.      | 118.445    | 49.545       | 49.66      | n.a.   | BMB  |
| <b>Total:</b> |              |           | 345.503    | 99.773       | 100.00     | 0.000  |      |

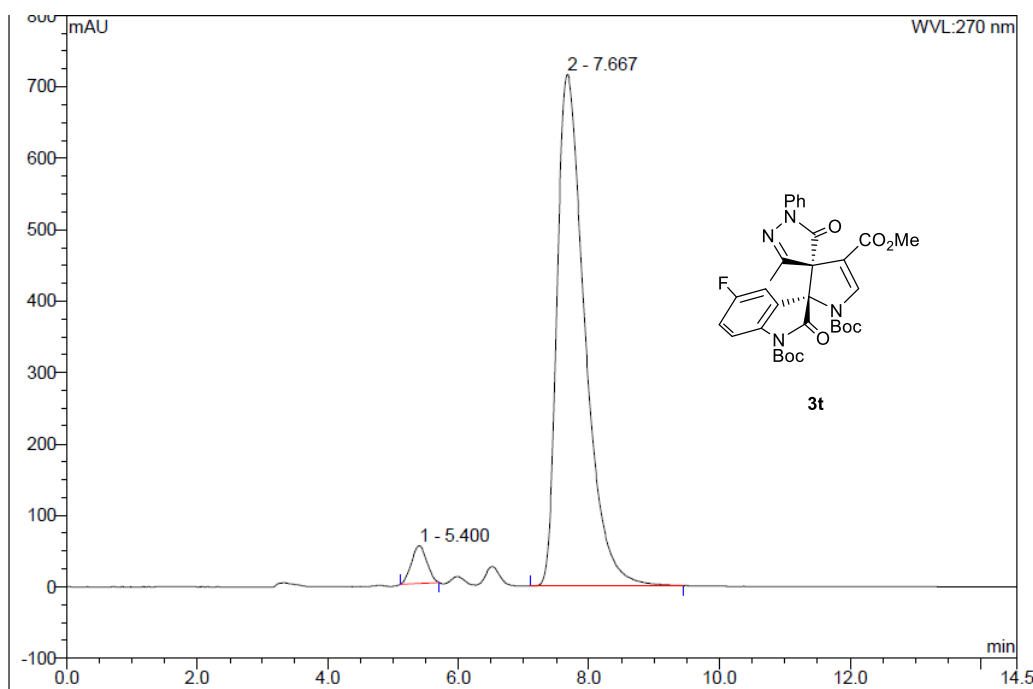

| No.           | Ret.Time min | Peak Name | Height mAU | Area mAU*min | Rel.Area % | Amount | Type |
|---------------|--------------|-----------|------------|--------------|------------|--------|------|
| 1             | 5.40         | n.a.      | 52.297     | 14.260       | 3.89       | n.a.   | BMB* |
| 2             | 7.67         | n.a.      | 716.217    | 352.748      | 96.11      | n.a.   | BMB* |
| <b>Total:</b> |              |           | 768.514    | 367.008      | 100.00     | 0.000  |      |



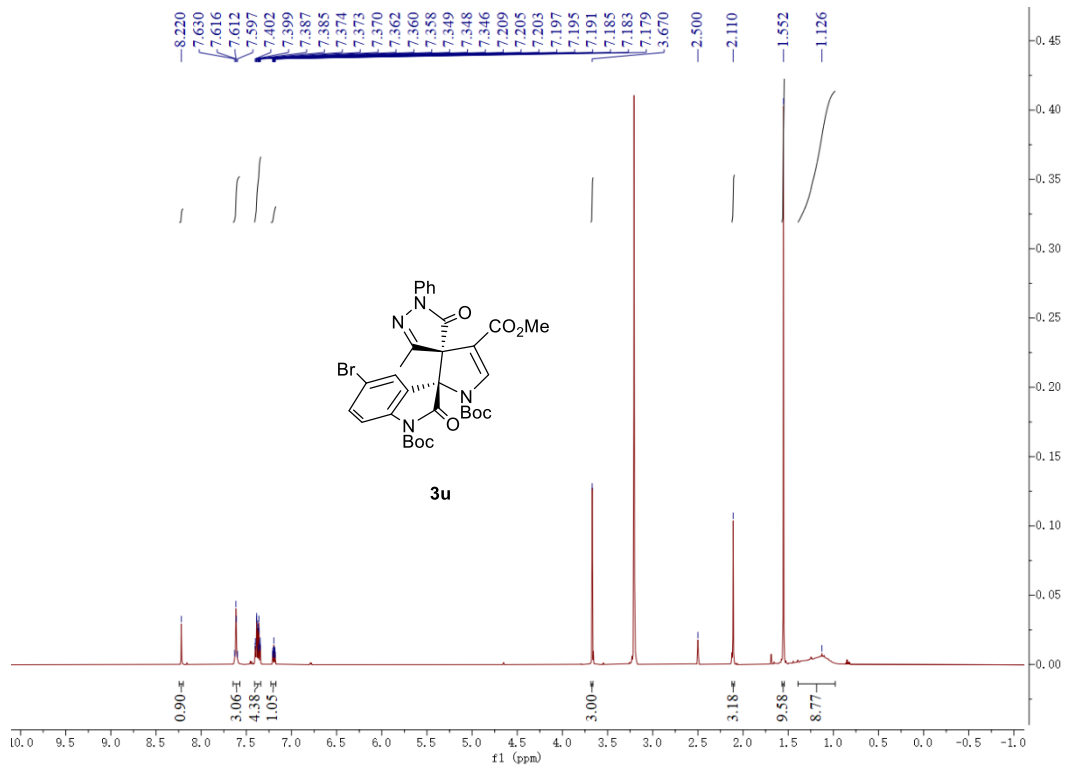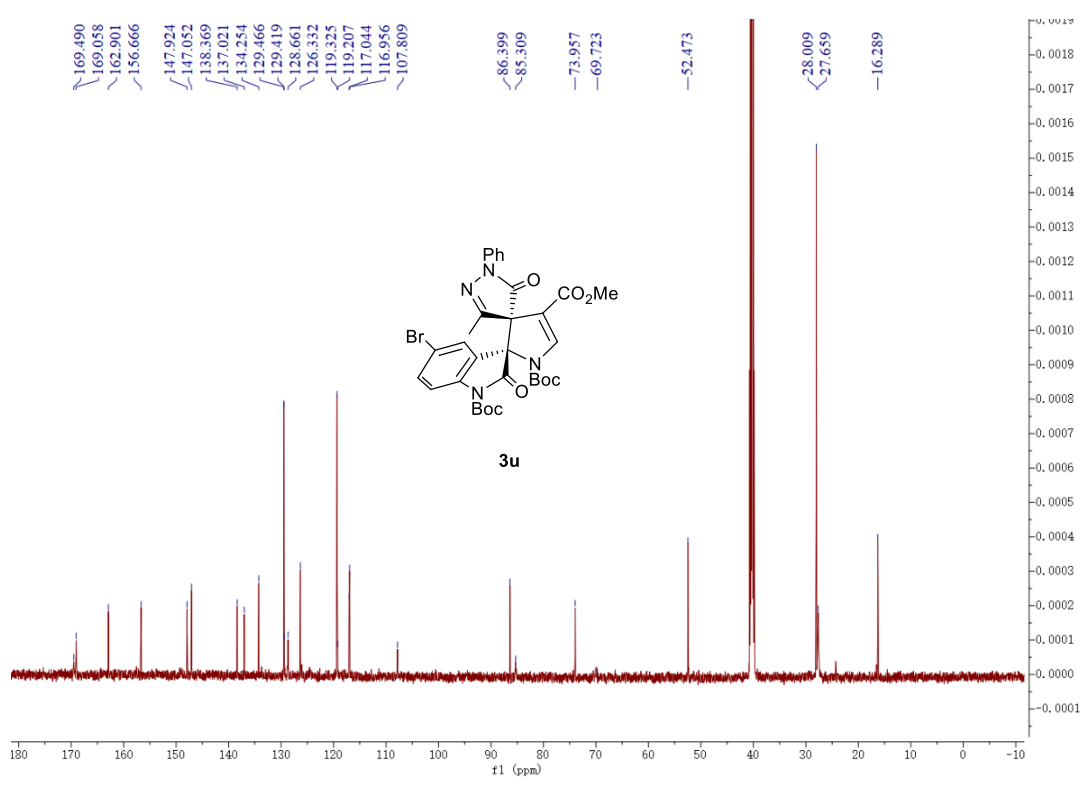

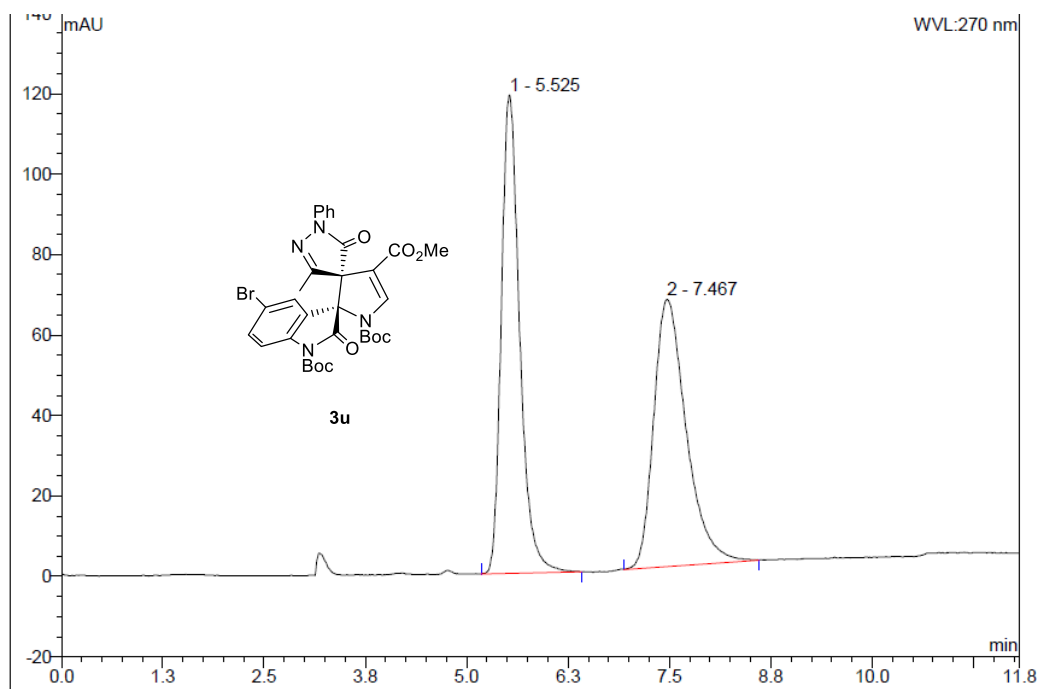

| No.           | Ret.Time min | Peak Name | Height mAU | Area mAU*min | Rel.Area % | Amount | Type |
|---------------|--------------|-----------|------------|--------------|------------|--------|------|
| 1             | 5.53         | n.a.      | 118.966    | 31.196       | 50.32      | n.a.   | BMB  |
| 2             | 7.47         | n.a.      | 66.363     | 30.799       | 49.68      | n.a.   | BMB  |
| <b>Total:</b> |              |           | 185.329    | 61.996       | 100.00     | 0.000  |      |

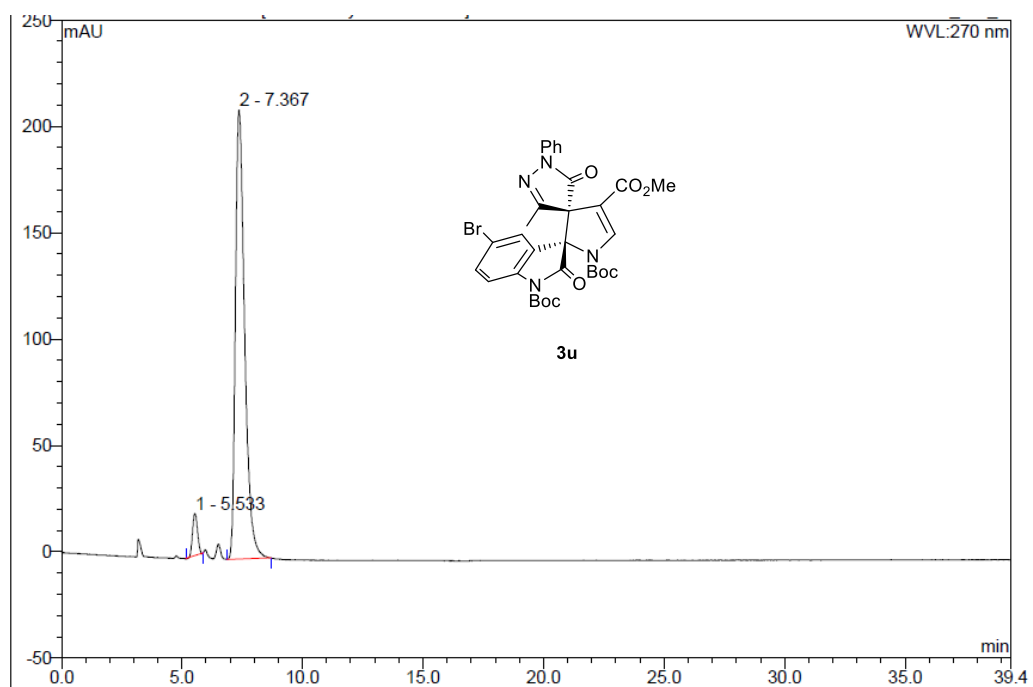

| No.           | Ret.Time min | Peak Name | Height mAU | Area mAU*min | Rel.Area % | Amount | Type |
|---------------|--------------|-----------|------------|--------------|------------|--------|------|
| 1             | 5.53         | n.a.      | 19.900     | 4.681        | 4.76       | n.a.   | BMB* |
| 2             | 7.37         | n.a.      | 211.145    | 93.688       | 95.24      | n.a.   | BMB  |
| <b>Total:</b> |              |           | 231.045    | 98.369       | 100.00     | 0.000  |      |

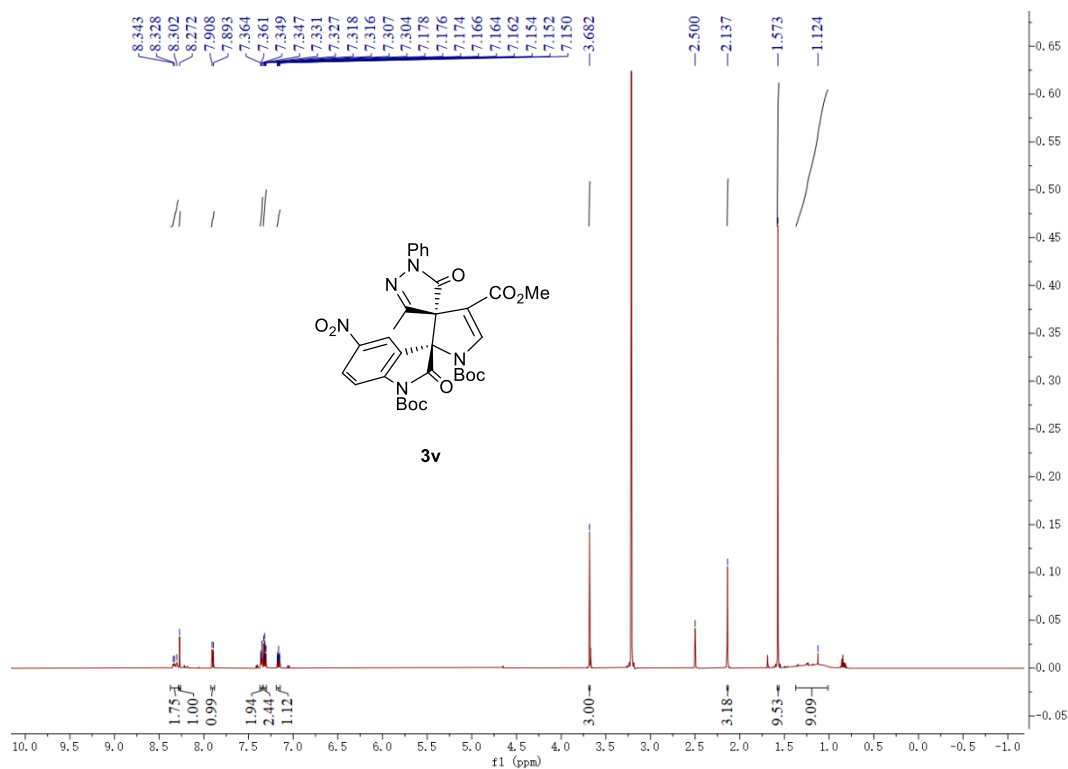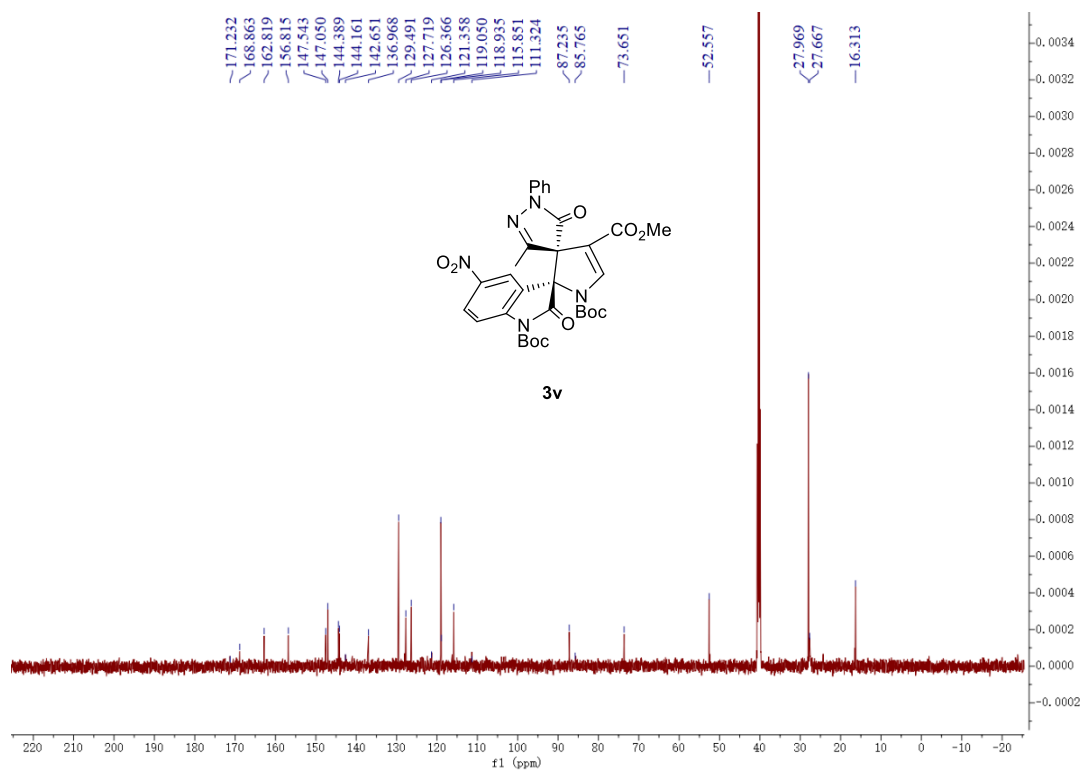

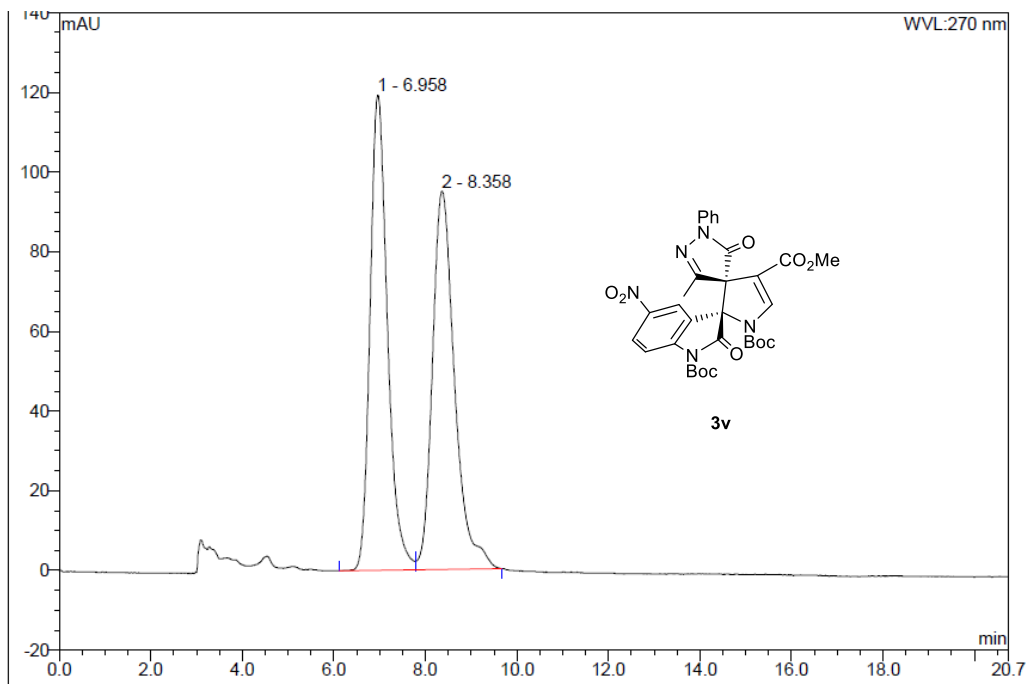

| No.           | Ret.Time<br>min | Peak Name | Height<br>mAU | Area<br>mAU*min | Rel.Area<br>% | Amount | Type |
|---------------|-----------------|-----------|---------------|-----------------|---------------|--------|------|
| 1             | 6.96            | n.a.      | 119.267       | 52.589          | 49.62         | n.a.   | BM   |
| 2             | 8.36            | n.a.      | 94.856        | 53.387          | 50.38         | n.a.   | MB   |
| <b>Total:</b> |                 |           | 214.123       | 105.976         | 100.00        | 0.000  |      |

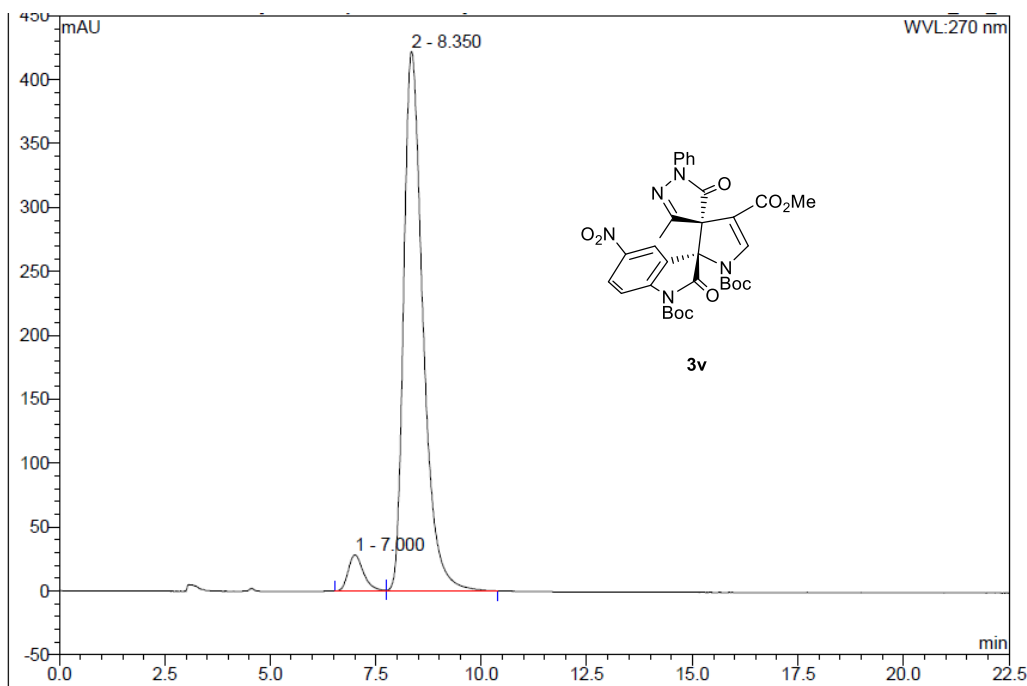

| No.           | Ret.Time<br>min | Peak Name | Height<br>mAU | Area<br>mAU*min | Rel.Area<br>% | Amount | Type |
|---------------|-----------------|-----------|---------------|-----------------|---------------|--------|------|
| 1             | 7.00            | n.a.      | 28.297        | 12.028          | 5.10          | n.a.   | BM * |
| 2             | 8.35            | n.a.      | 422.221       | 223.604         | 94.90         | n.a.   | MB*  |
| <b>Total:</b> |                 |           | 450.518       | 235.632         | 100.00        | 0.000  |      |

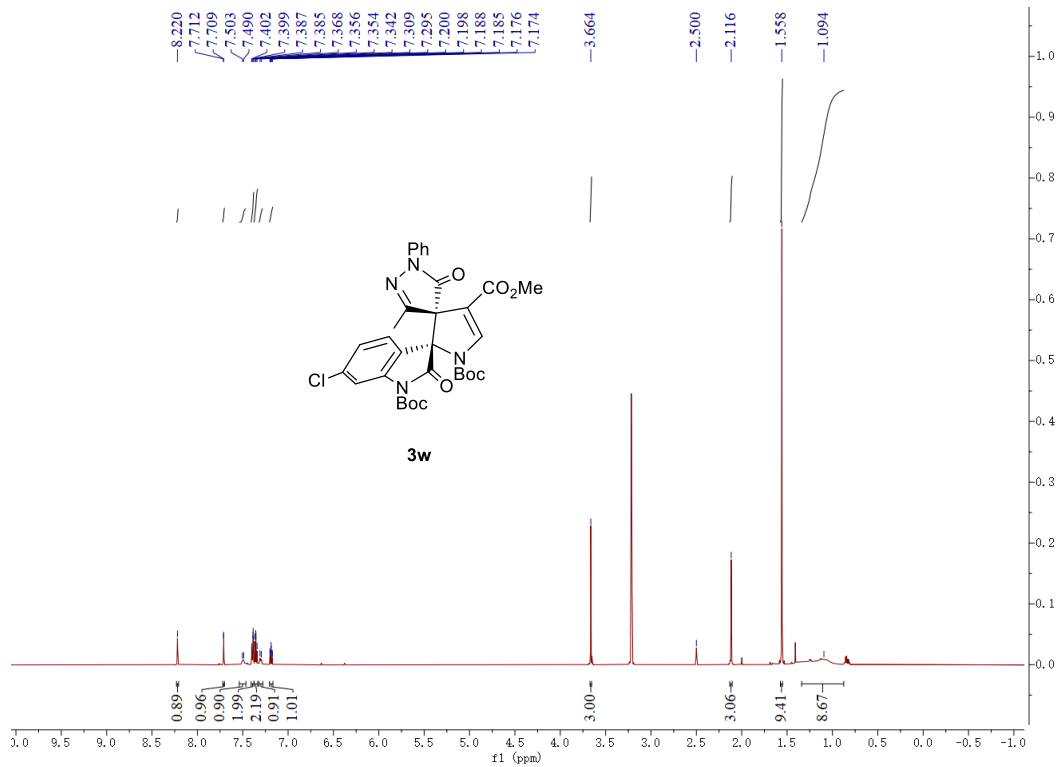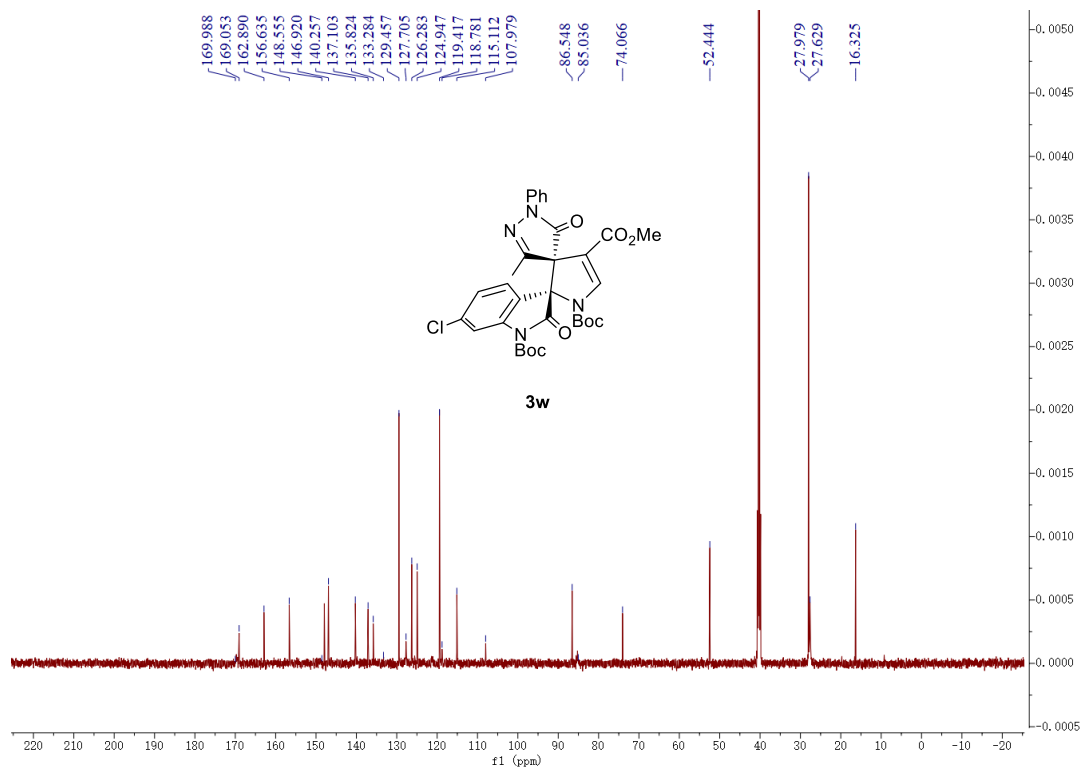

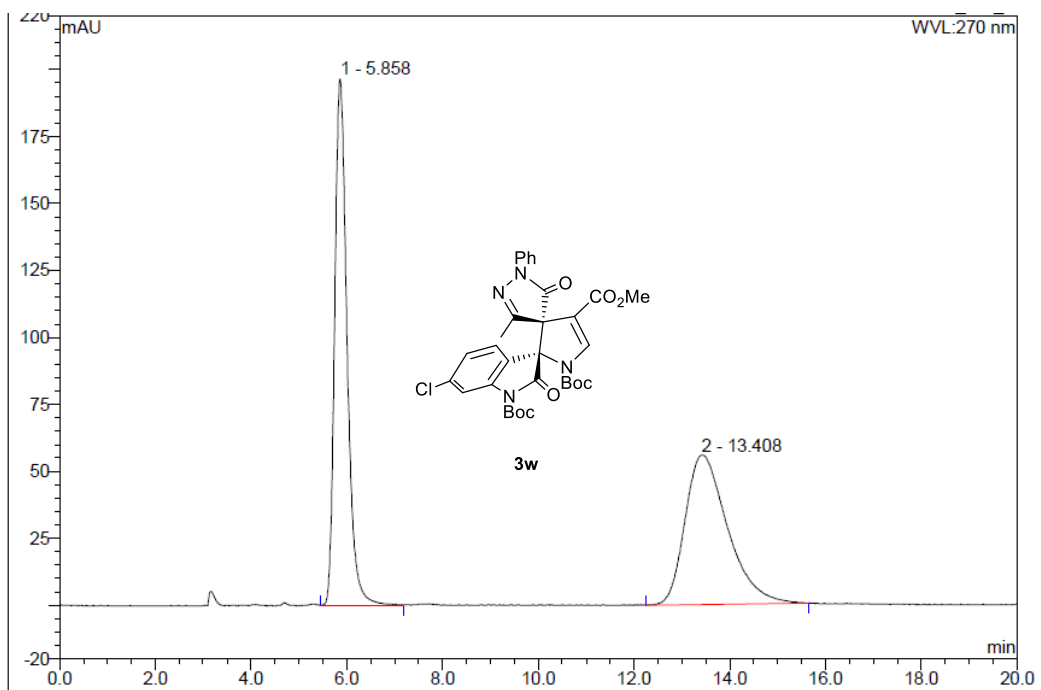

| No.           | Ret.Time min | Peak Name | Height mAU | Area mAU*min | Rel.Area % | Amount | Type |
|---------------|--------------|-----------|------------|--------------|------------|--------|------|
| 1             | 5.86         | n.a.      | 196.461    | 58.636       | 50.60      | n.a.   | BMB  |
| 2             | 13.41        | n.a.      | 55.732     | 57.243       | 49.40      | n.a.   | BMB  |
| <b>Total:</b> |              |           | 252.194    | 115.879      | 100.00     | 0.000  |      |

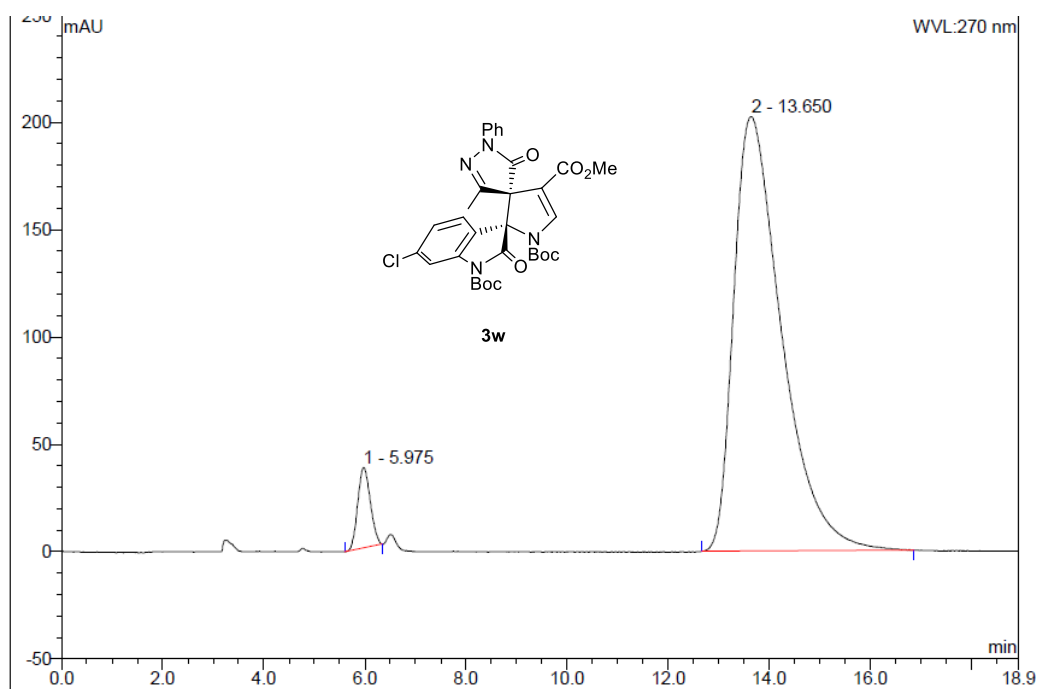

| No.           | Ret.Time min | Peak Name | Height mAU | Area mAU*min | Rel.Area % | Amount | Type |
|---------------|--------------|-----------|------------|--------------|------------|--------|------|
| 1             | 5.98         | n.a.      | 37.480     | 10.830       | 4.66       | n.a.   | BMB* |
| 2             | 13.65        | n.a.      | 202.490    | 221.774      | 95.34      | n.a.   | BMB* |
| <b>Total:</b> |              |           | 239.970    | 232.605      | 100.00     | 0.000  |      |

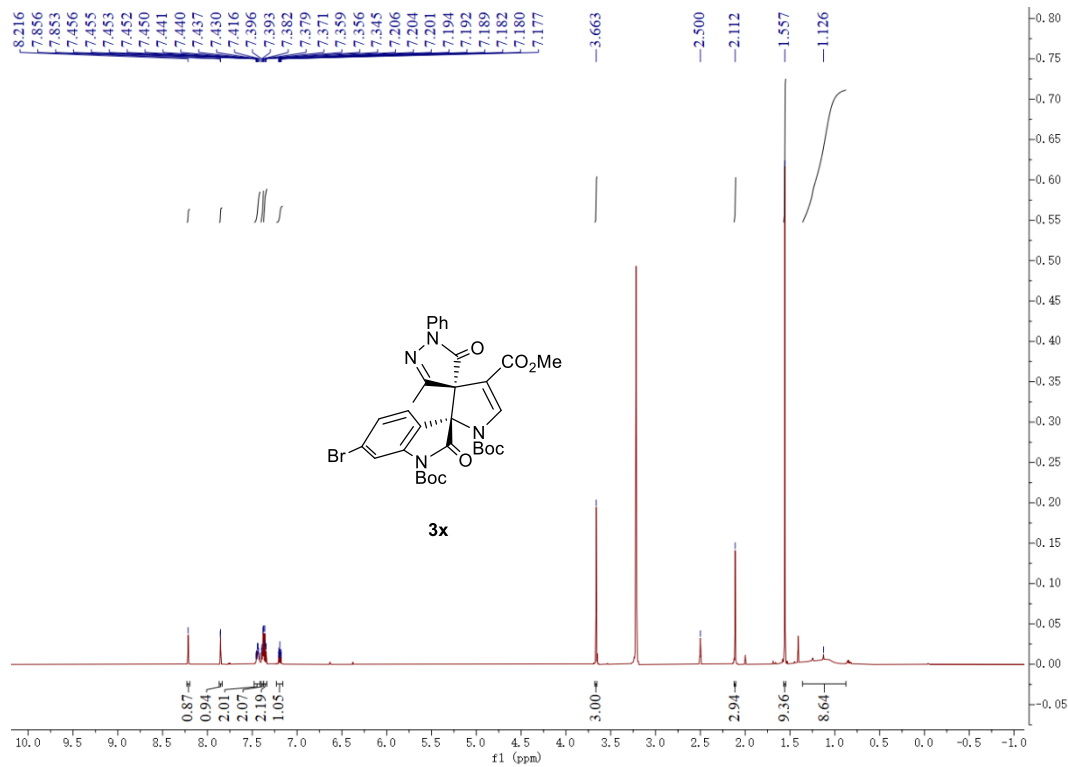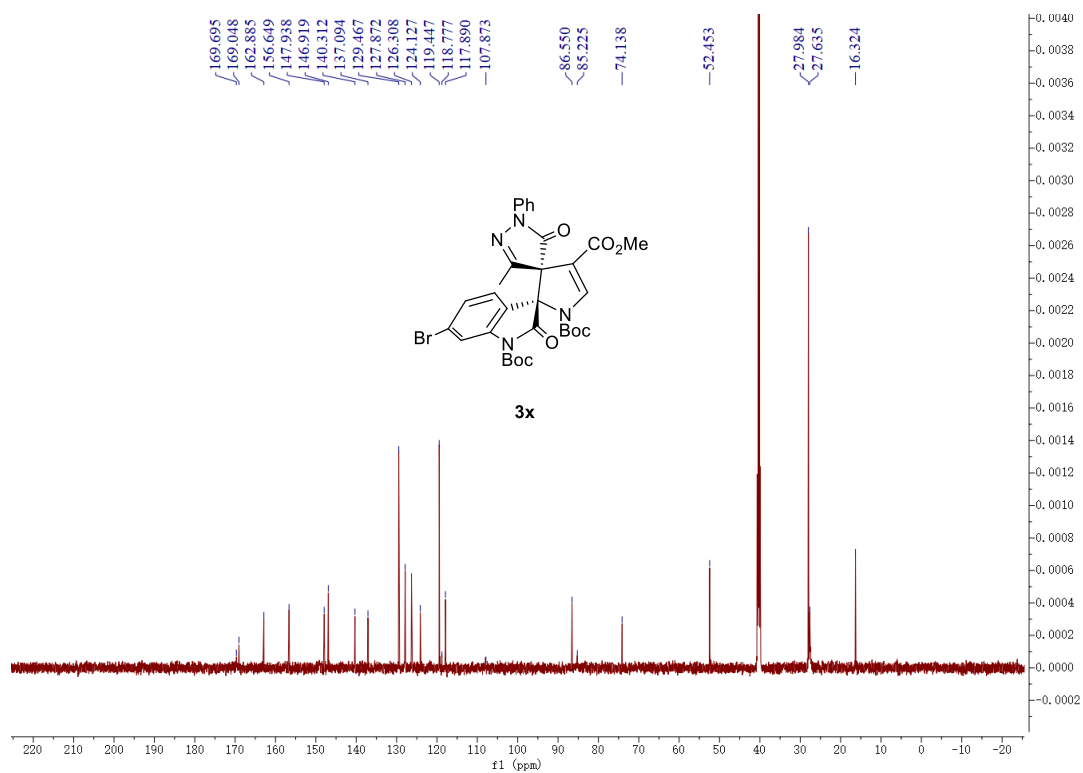

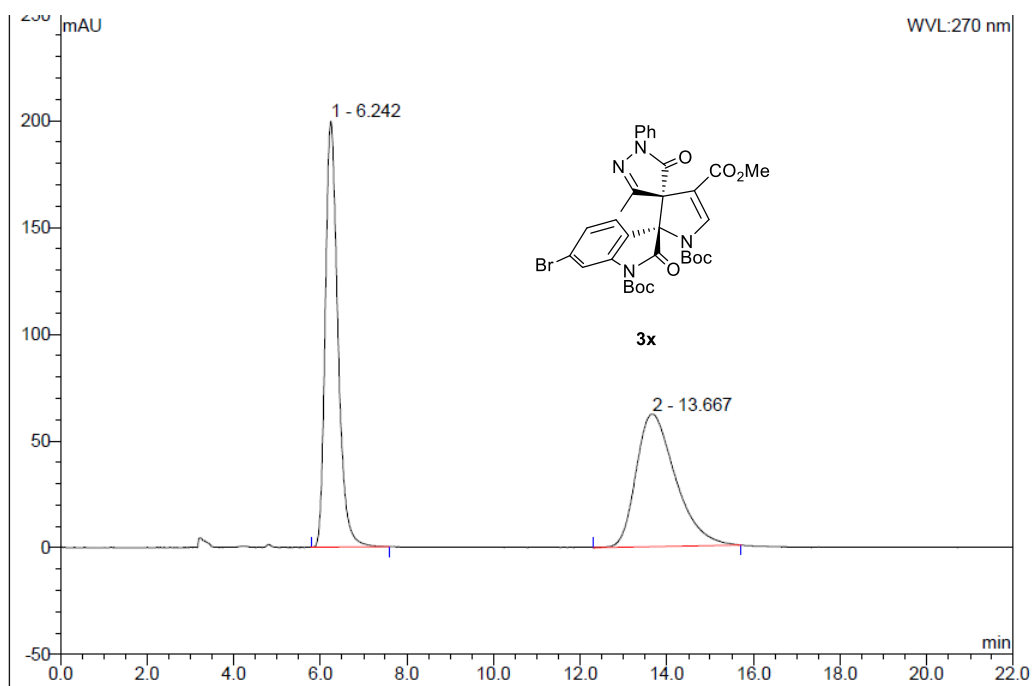

| No.           | Ret.Time<br>min | Peak Name | Height<br>mAU | Area<br>mAU*min | Rel.Area<br>% | Amount | Type |
|---------------|-----------------|-----------|---------------|-----------------|---------------|--------|------|
| 1             | 6.24            | n.a.      | 199.813       | 67.437          | 50.75         | n.a.   | BMB  |
| 2             | 13.67           | n.a.      | 62.171        | 65.433          | 49.25         | n.a.   | BMB  |
| <b>Total:</b> |                 |           | 261.984       | 132.871         | 100.00        | 0.000  |      |

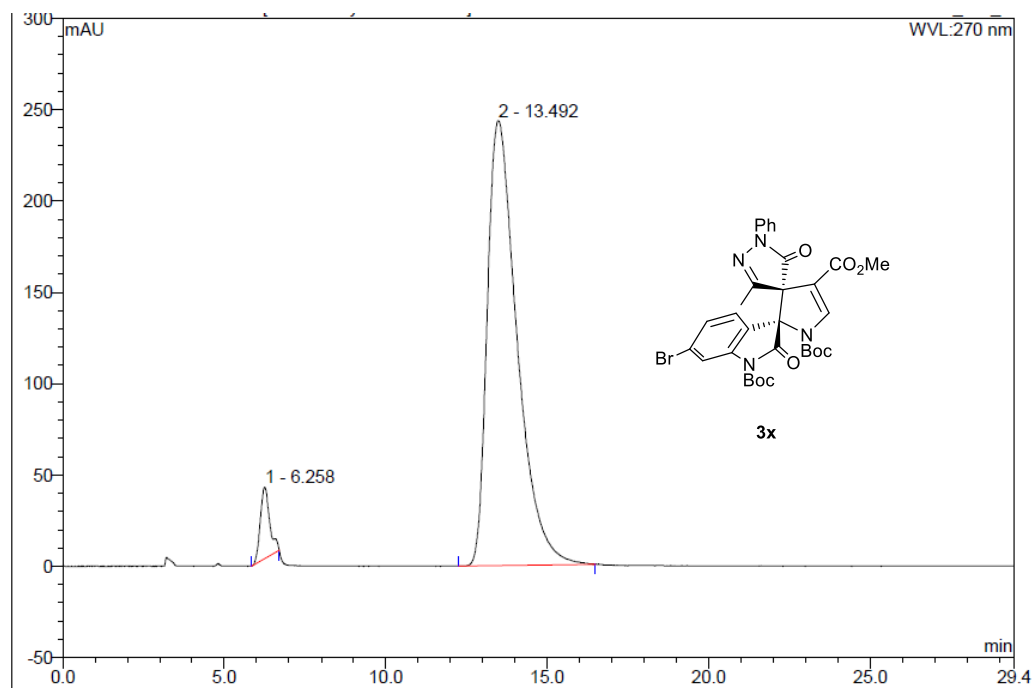

| No.           | Ret.Time<br>min | Peak Name | Height<br>mAU | Area<br>mAU*min | Rel.Area<br>% | Amount | Type |
|---------------|-----------------|-----------|---------------|-----------------|---------------|--------|------|
| 1             | 6.26            | n.a.      | 38.832        | 13.135          | 4.81          | n.a.   | BMB* |
| 2             | 13.49           | n.a.      | 243.556       | 260.149         | 95.19         | n.a.   | BMB* |
| <b>Total:</b> |                 |           | 282.388       | 273.284         | 100.00        | 0.000  |      |



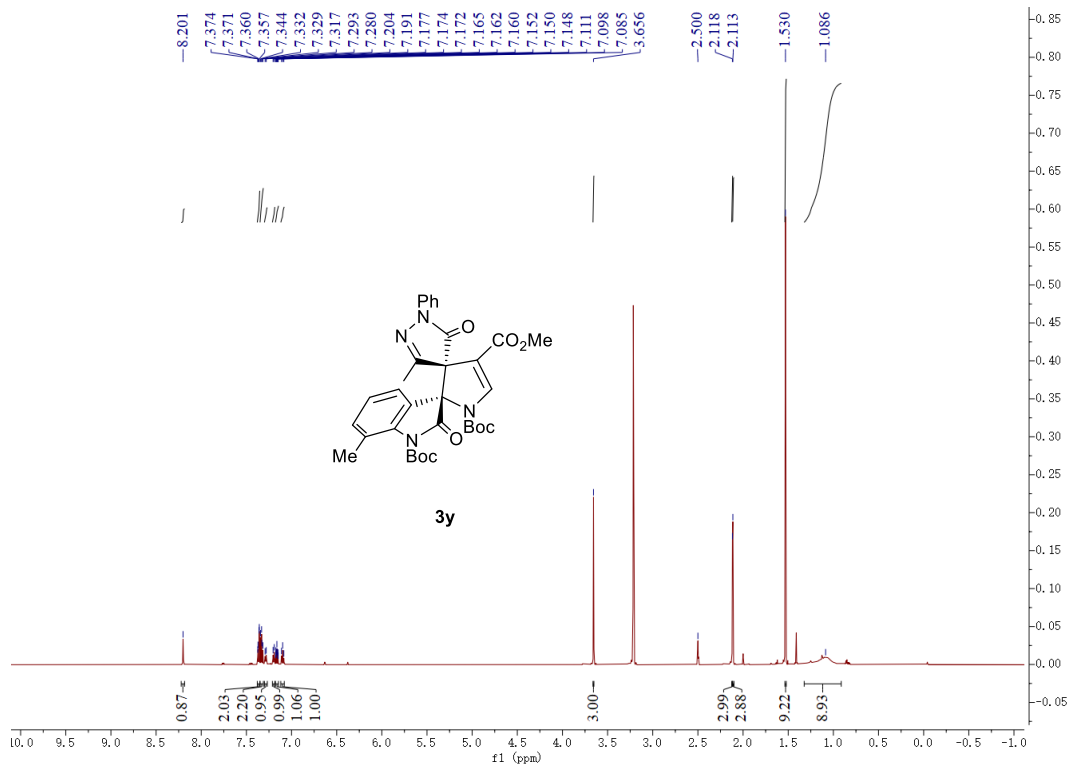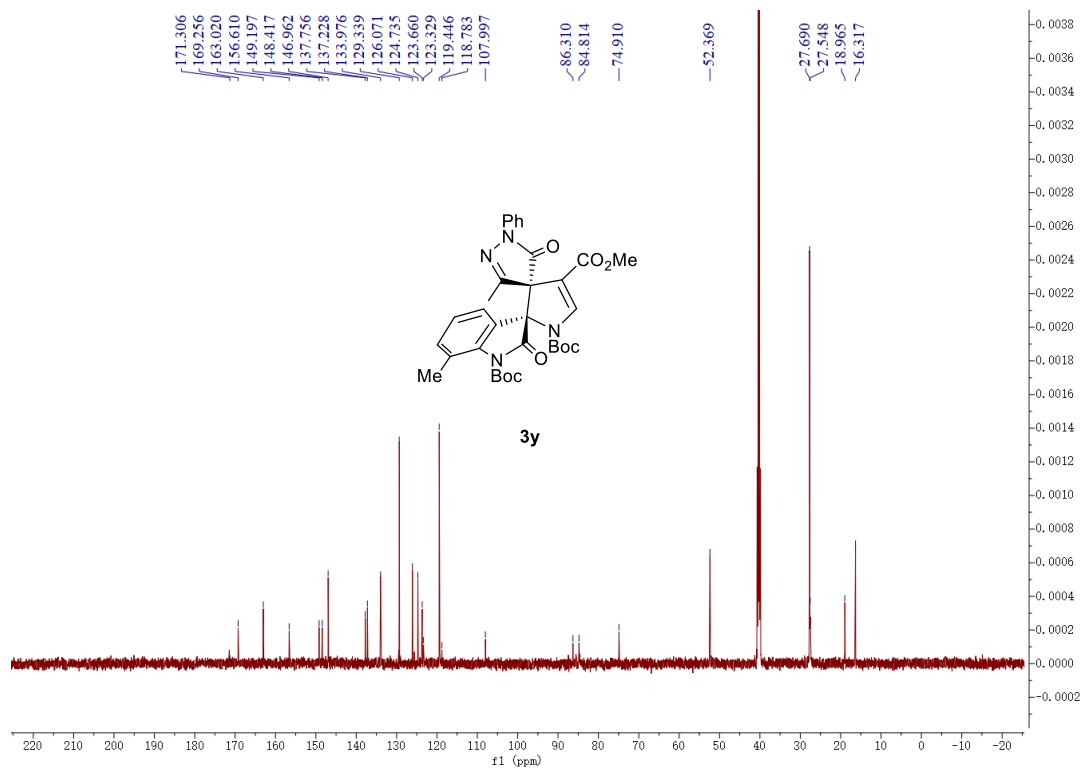

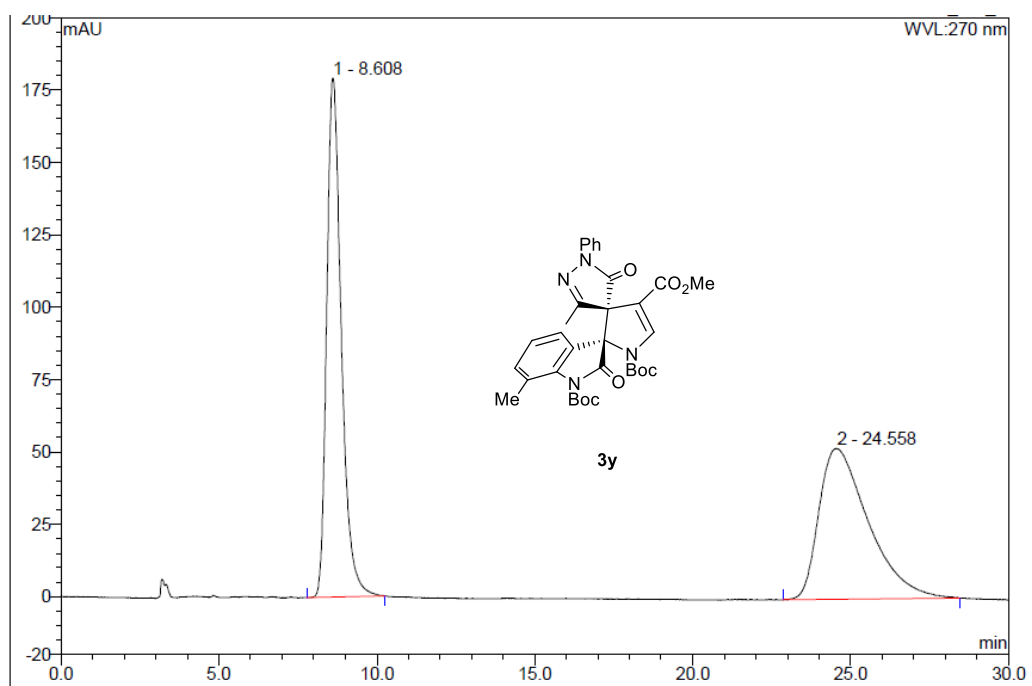

| No.           | Ret.Time min | Peak Name | Height mAU | Area mAU*min | Rel.Area % | Amount | Type |
|---------------|--------------|-----------|------------|--------------|------------|--------|------|
| 1             | 8.61         | n.a.      | 179.410    | 96.134       | 50.38      | n.a.   | BMB  |
| 2             | 24.56        | n.a.      | 52.094     | 94.691       | 49.62      | n.a.   | BMB  |
| <b>Total:</b> |              |           | 231.505    | 190.825      | 100.00     | 0.000  |      |

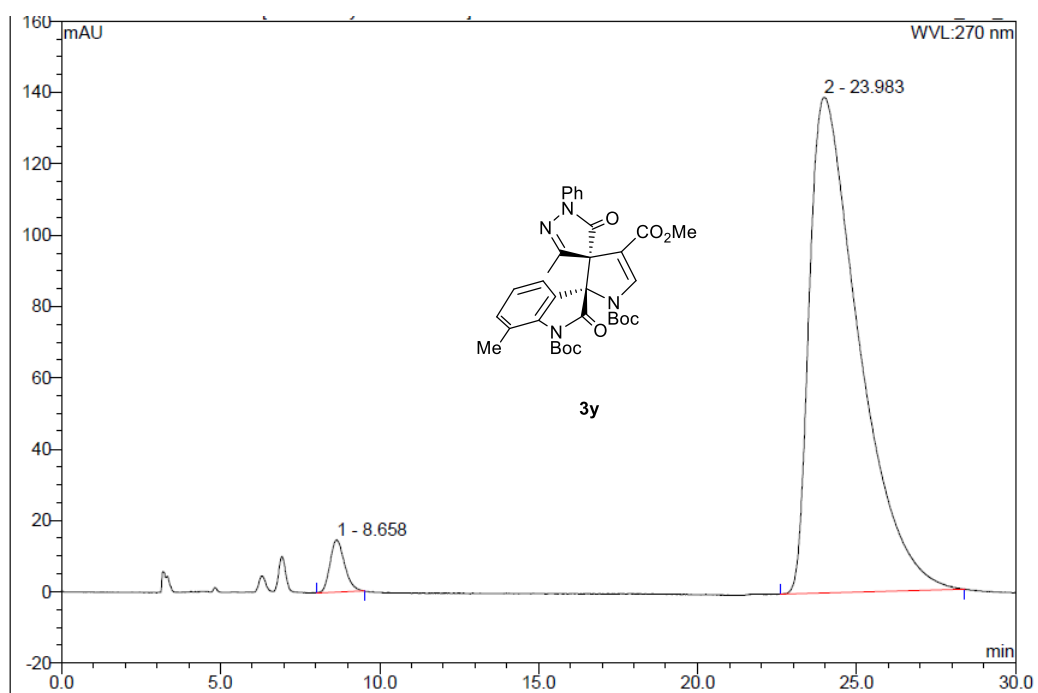

| No.           | Ret.Time min | Peak Name | Height mAU | Area mAU*min | Rel.Area % | Amount | Type |
|---------------|--------------|-----------|------------|--------------|------------|--------|------|
| 1             | 8.66         | n.a.      | 14.636     | 7.753        | 3.00       | n.a.   | BMB* |
| 2             | 23.98        | n.a.      | 139.081    | 251.077      | 97.00      | n.a.   | BMB* |
| <b>Total:</b> |              |           | 153.717    | 258.830      | 100.00     | 0.000  |      |

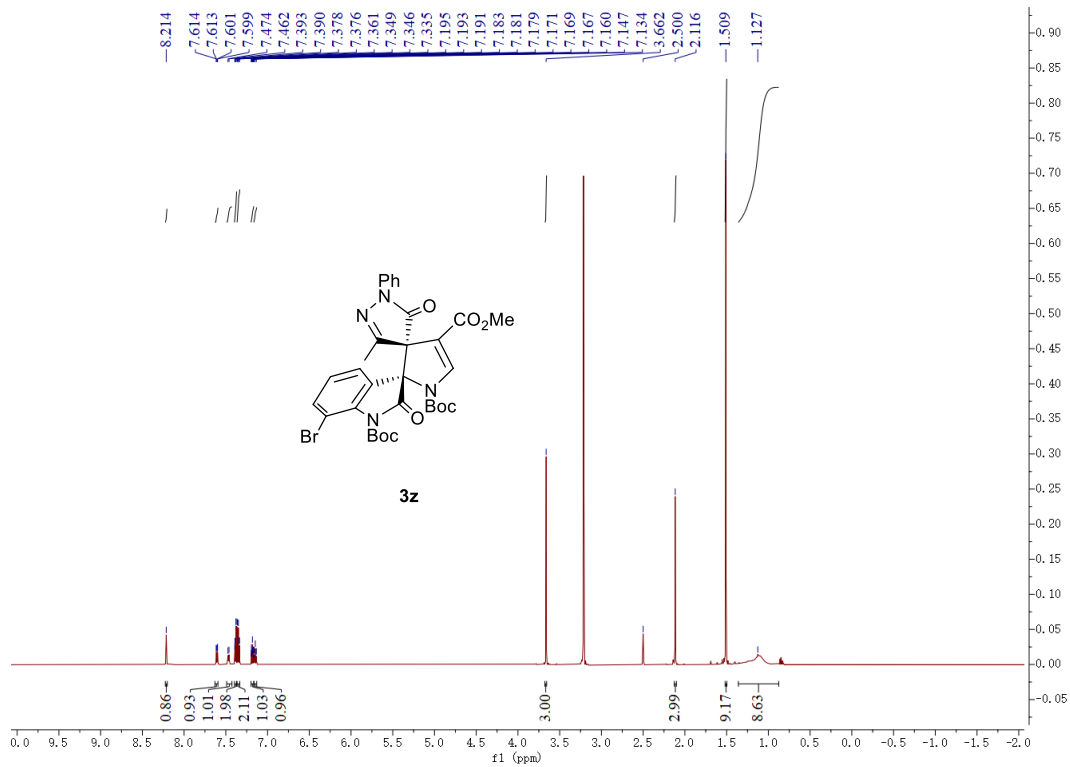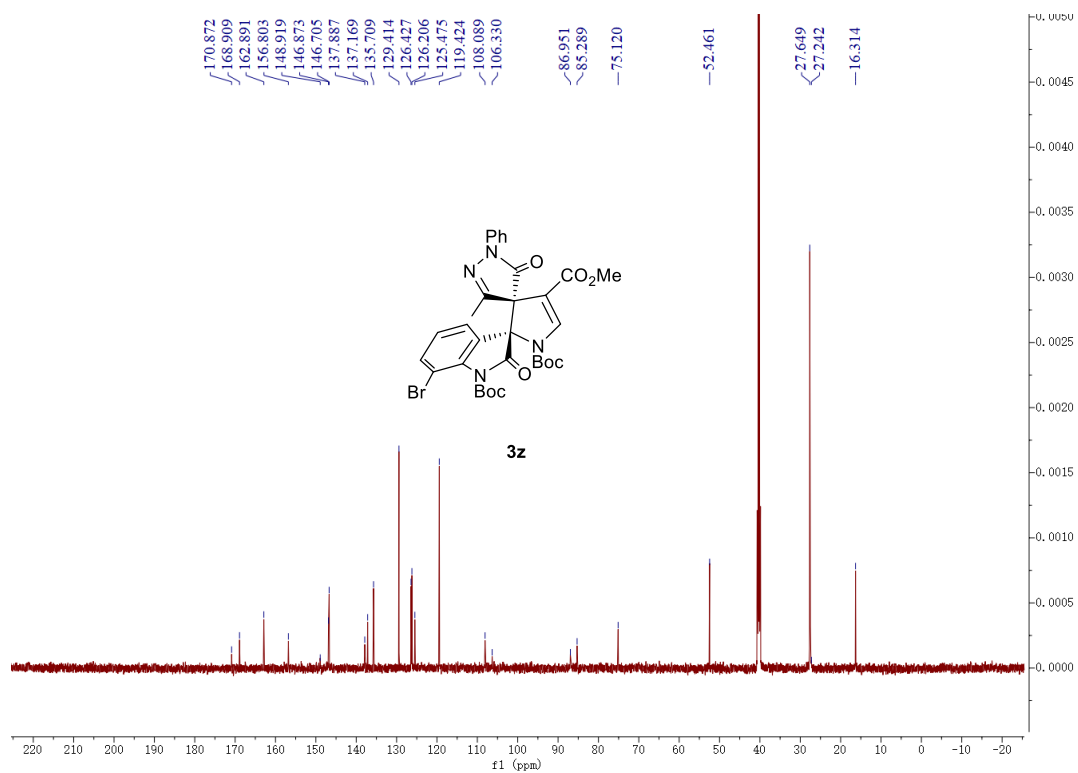

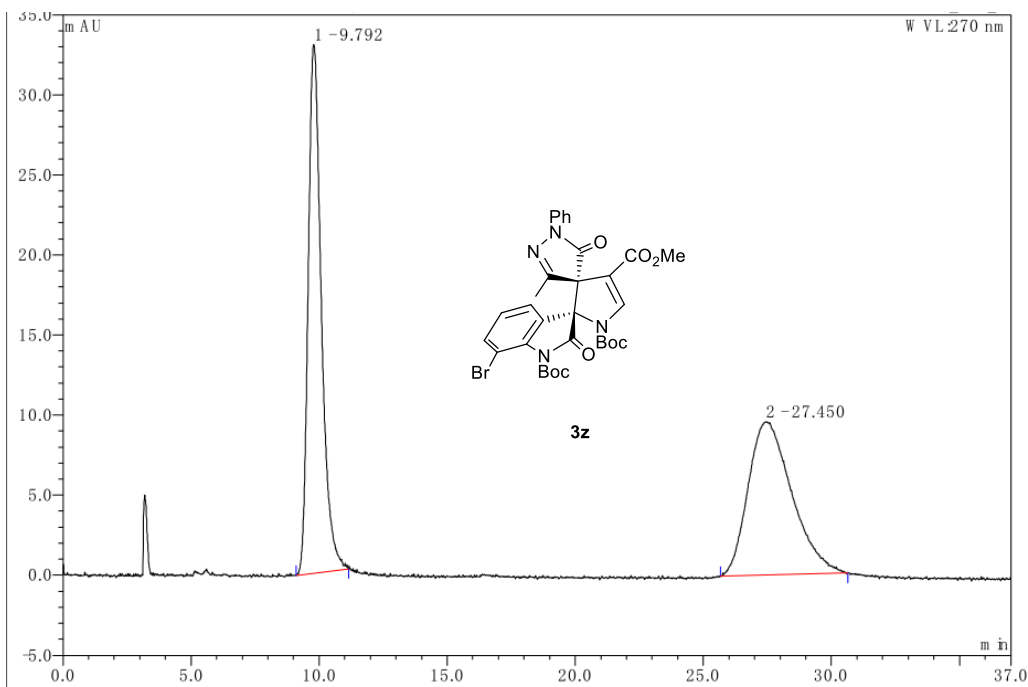

| No.           | Ret.Time min | Peak Name | Height mAU | Area mAU*min | Rel.Area % | Amount | Type |
|---------------|--------------|-----------|------------|--------------|------------|--------|------|
| 1             | 9.79         | n.a.      | 33.026     | 19.672       | 50.94      | n.a.   | BMB  |
| 2             | 27.45        | n.a.      | 9.573      | 18.949       | 49.06      | n.a.   | BMB* |
| <b>Total:</b> |              |           | 42.599     | 38.621       | 100.00     | 0.000  |      |

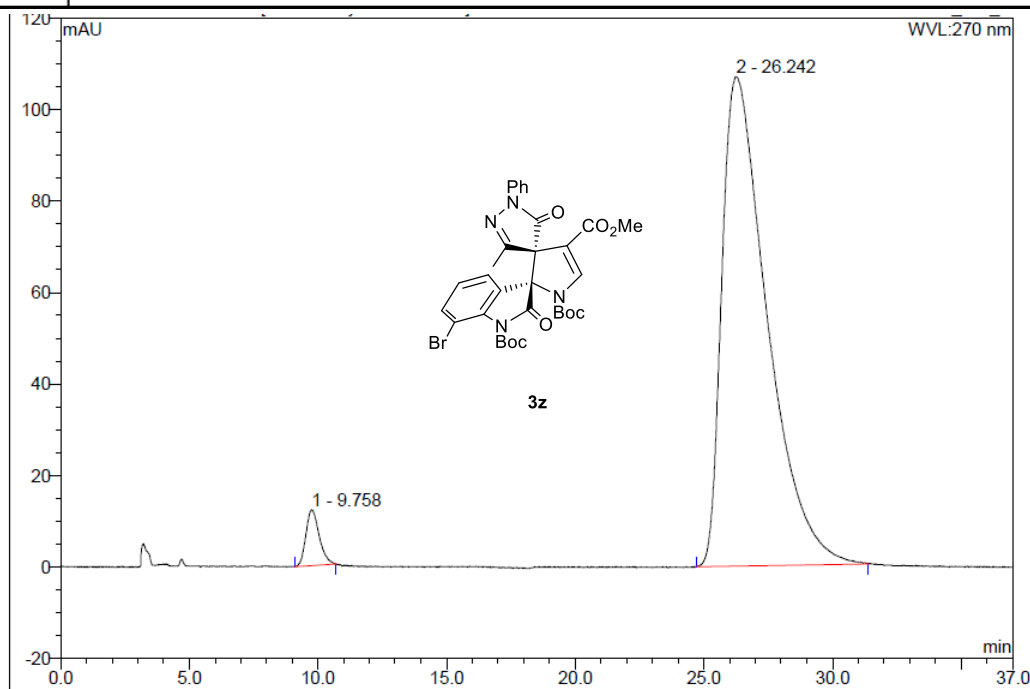

| No.           | Ret.Time min | Peak Name | Height mAU | Area mAU*min | Rel.Area % | Amount | Type |
|---------------|--------------|-----------|------------|--------------|------------|--------|------|
| 1             | 9.76         | n.a.      | 12.198     | 7.316        | 3.25       | n.a.   | BMB  |
| 2             | 26.24        | n.a.      | 106.962    | 217.759      | 96.75      | n.a.   | BMB* |
| <b>Total:</b> |              |           | 119.160    | 225.075      | 100.00     | 0.000  |      |

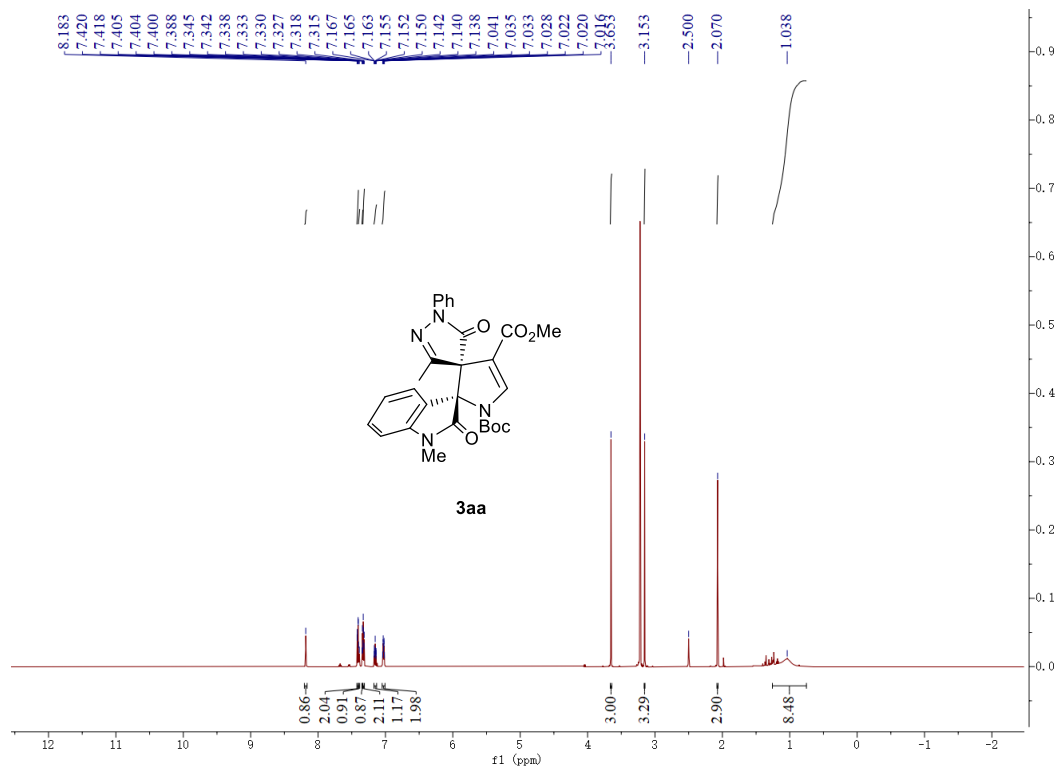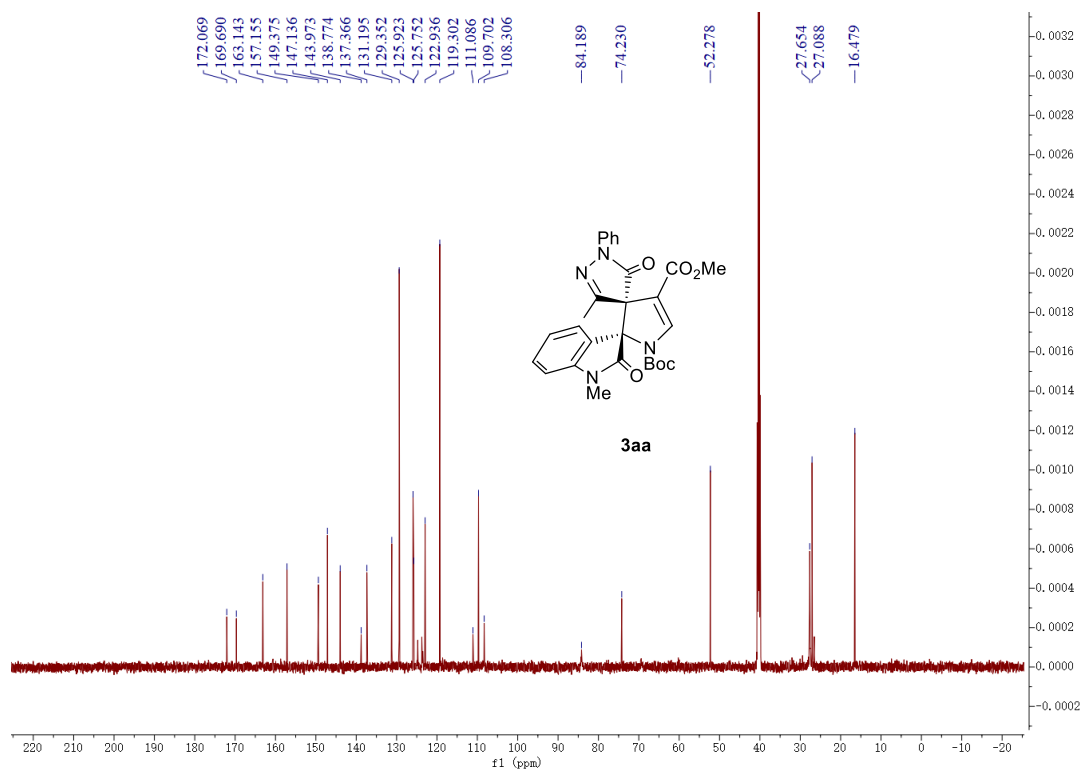

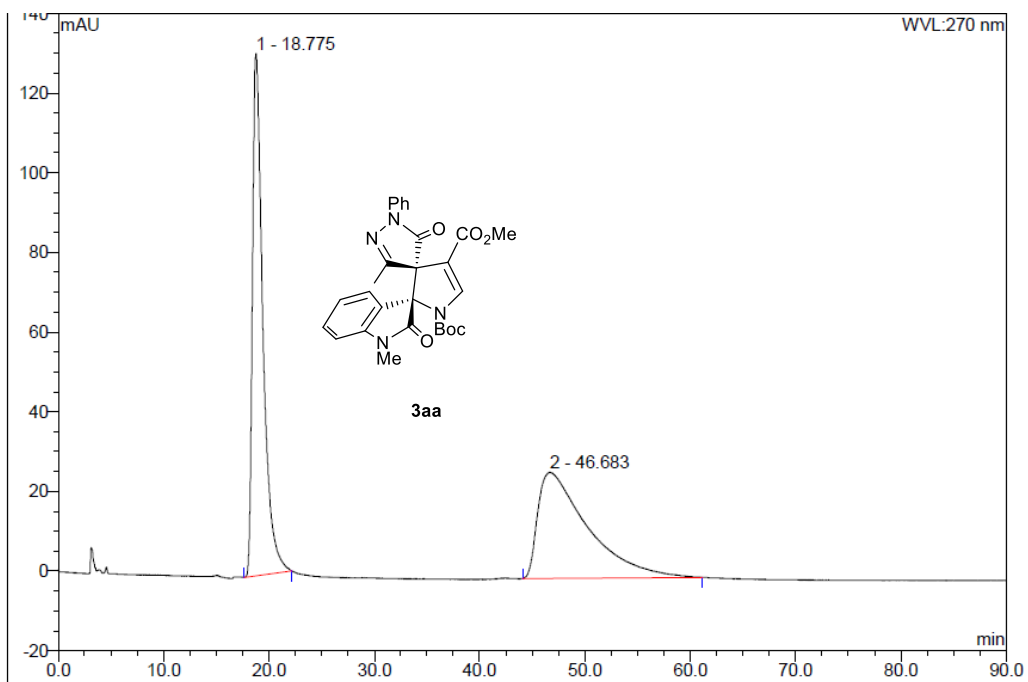

| No.           | Ret.Time<br>min | Peak Name | Height<br>mAU | Area<br>mAU*min | Rel.Area<br>% | Amount | Type |
|---------------|-----------------|-----------|---------------|-----------------|---------------|--------|------|
| 1             | 18.78           | n.a.      | 131.138       | 150.921         | 50.82         | n.a.   | BMB  |
| 2             | 46.68           | n.a.      | 26.615        | 146.037         | 49.18         | n.a.   | BMB* |
| <b>Total:</b> |                 |           | 157.754       | 296.958         | 100.00        | 0.000  |      |

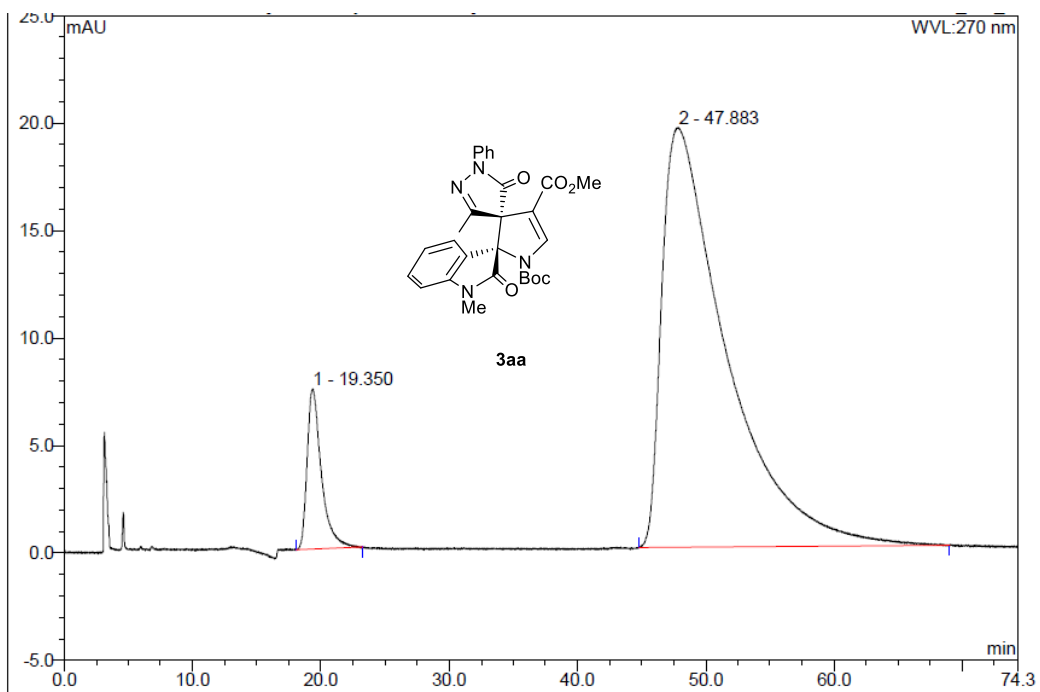

| No.           | Ret.Time<br>min | Peak Name | Height<br>mAU | Area<br>mAU*min | Rel.Area<br>% | Amount | Type |
|---------------|-----------------|-----------|---------------|-----------------|---------------|--------|------|
| 1             | 19.35           | n.a.      | 7.453         | 9.587           | 7.78          | n.a.   | BMB* |
| 2             | 47.88           | n.a.      | 19.540        | 113.593         | 92.22         | n.a.   | BMB* |
| <b>Total:</b> |                 |           | 26.993        | 123.181         | 100.00        | 0.000  |      |

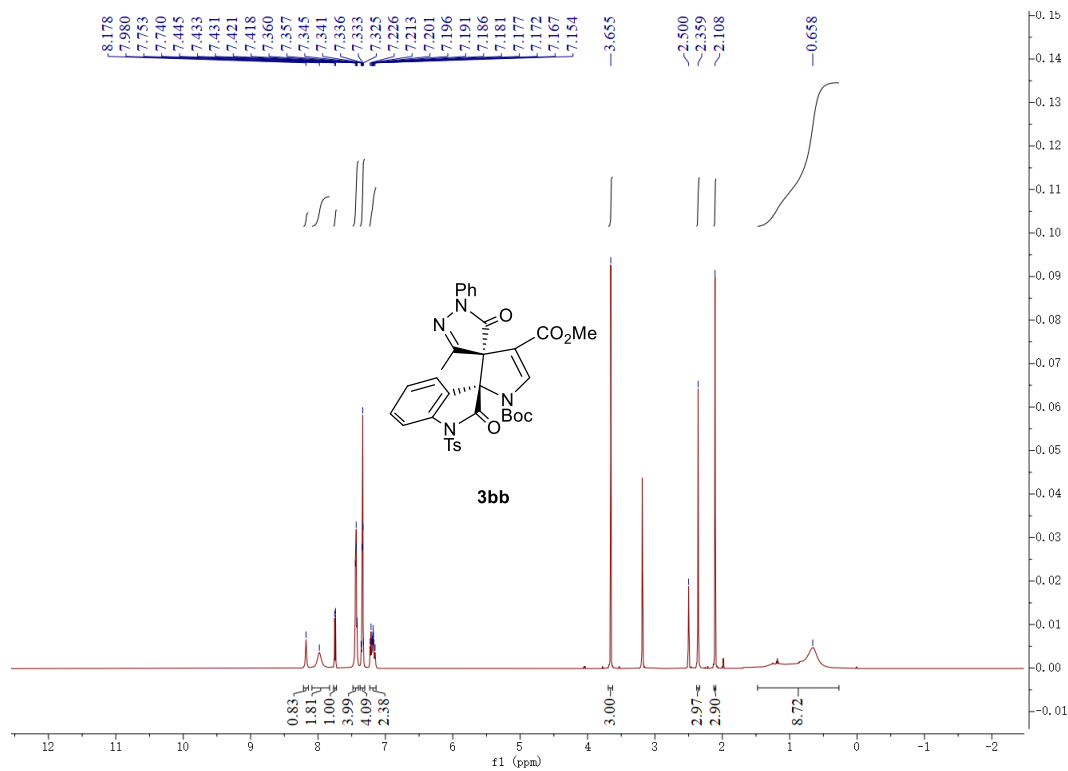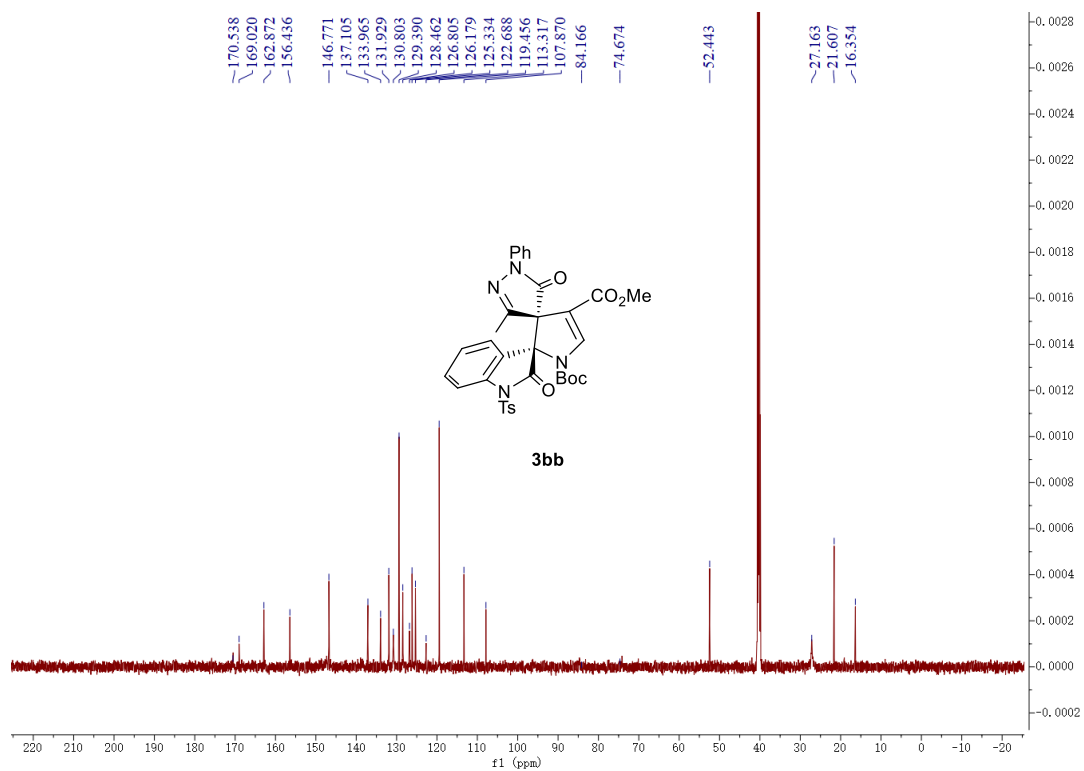

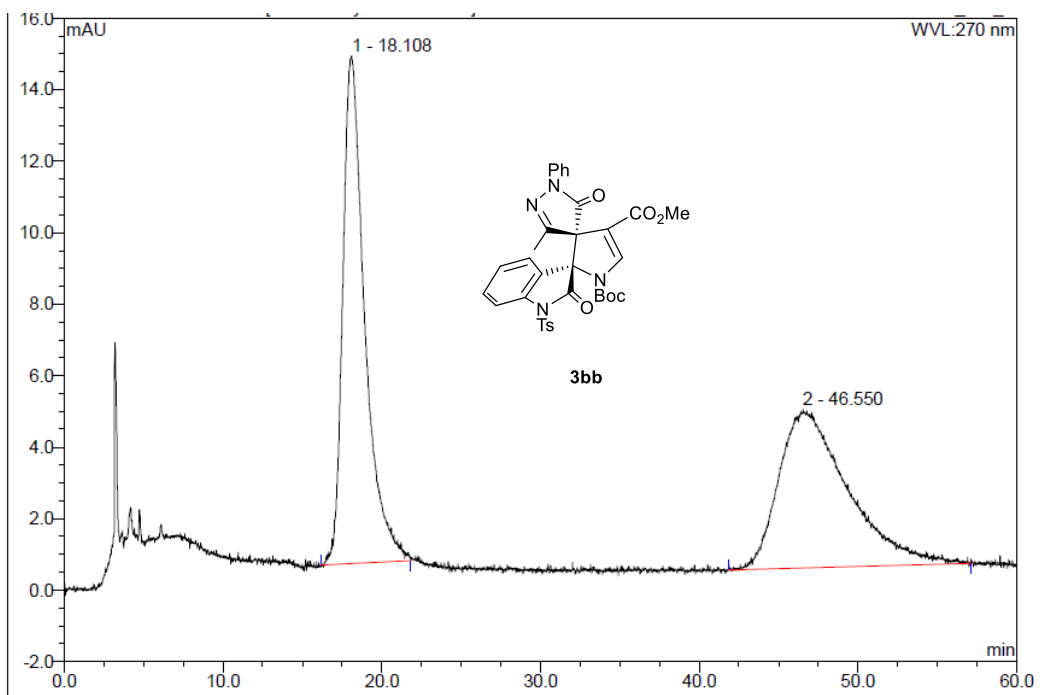

| No.           | Ret.Time<br>min | Peak Name | Height<br>mAU | Area<br>mAU*min | Rel.Area<br>% | Amount | Type |
|---------------|-----------------|-----------|---------------|-----------------|---------------|--------|------|
| 1             | 18.11           | n.a.      | 14.202        | 22.781          | 50.75         | n.a.   | BMB* |
| 2             | 46.55           | n.a.      | 4.434         | 22.106          | 49.25         | n.a.   | BMB* |
| <b>Total:</b> |                 |           | 18.635        | 44.887          | 100.00        | 0.000  |      |

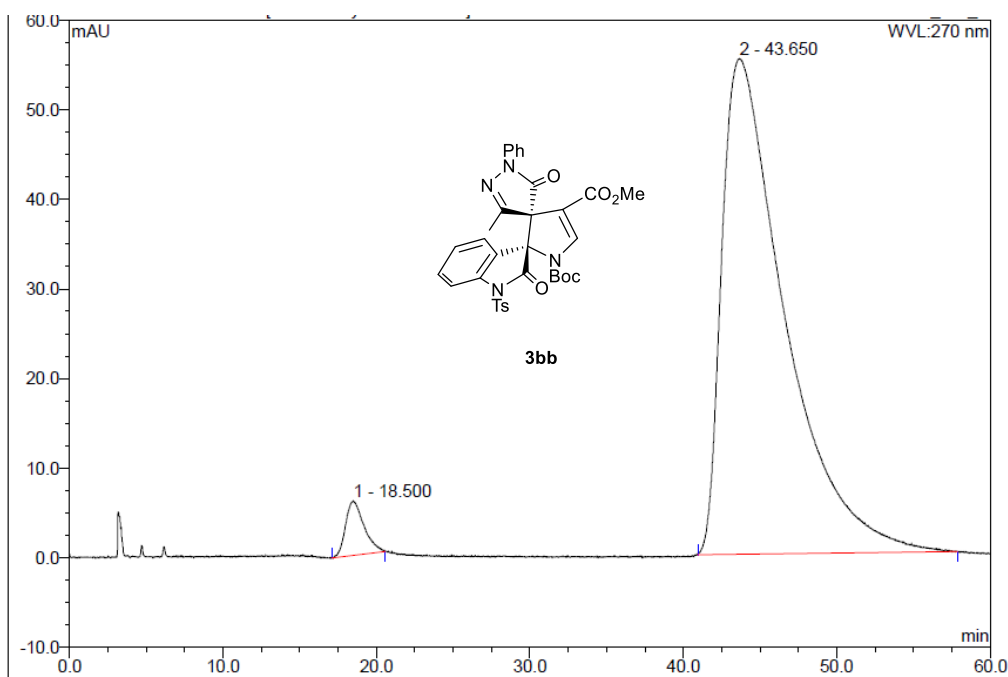

| No.           | Ret.Time<br>min | Peak Name | Height<br>mAU | Area<br>mAU*min | Rel.Area<br>% | Amount | Type |
|---------------|-----------------|-----------|---------------|-----------------|---------------|--------|------|
| 1             | 18.50           | n.a.      | 6.106         | 8.424           | 3.11          | n.a.   | BMB* |
| 2             | 43.65           | n.a.      | 55.326        | 262.205         | 96.89         | n.a.   | BMB* |
| <b>Total:</b> |                 |           | 61.432        | 270.629         | 100.00        | 0.000  |      |



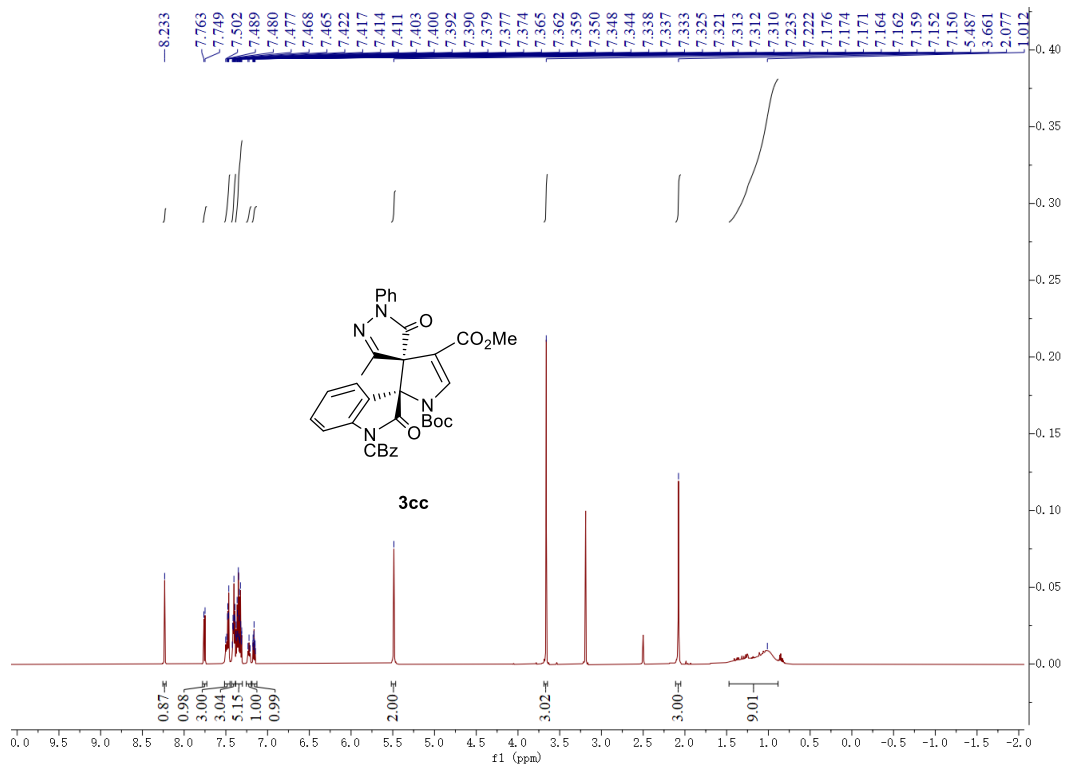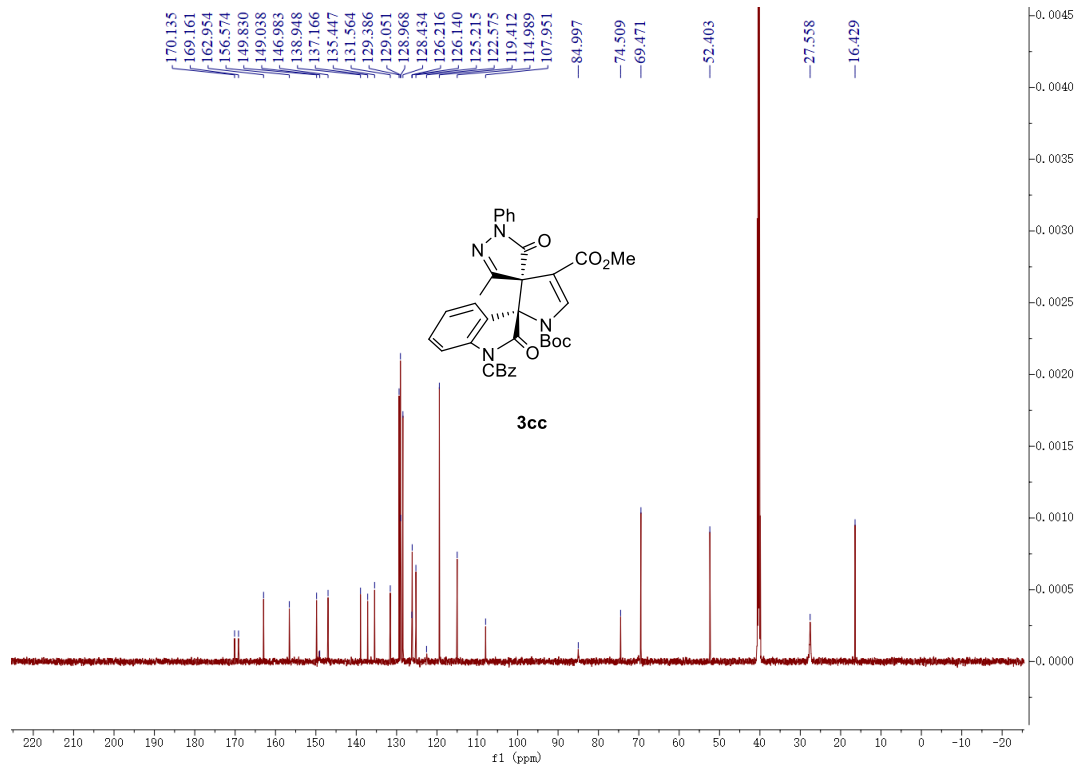

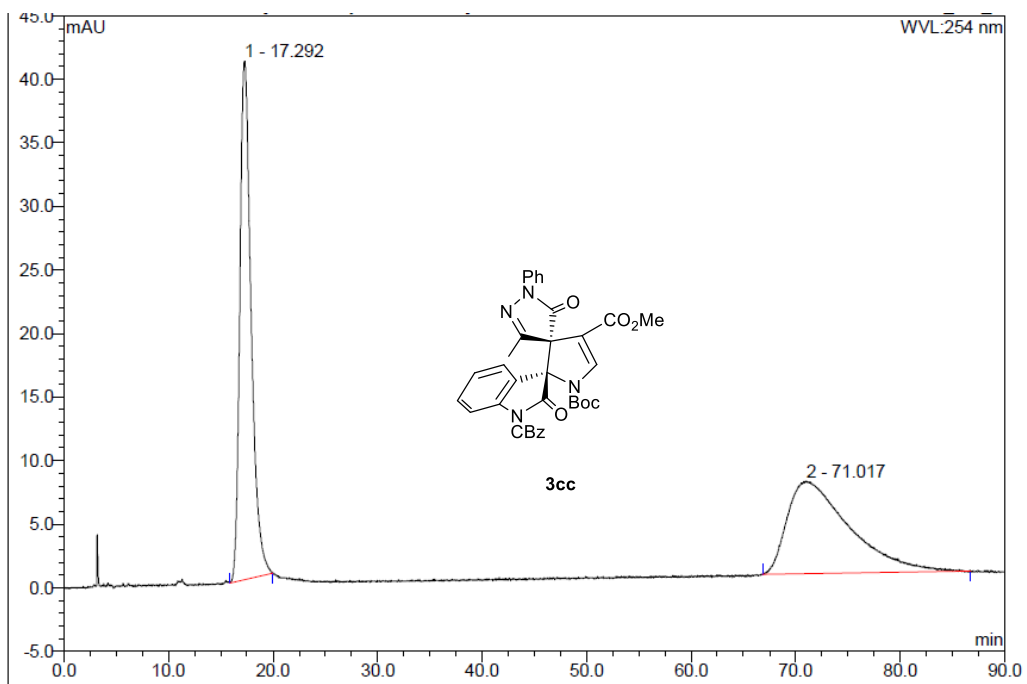

| No.           | Ret.Time<br>min | Peak Name | Height<br>mAU | Area<br>mAU*min | Rel.Area<br>% | Amount | Type |
|---------------|-----------------|-----------|---------------|-----------------|---------------|--------|------|
| 1             | 17.29           | n.a.      | 40.801        | 51.034          | 50.61         | n.a.   | BMB  |
| 2             | 71.02           | n.a.      | 7.318         | 49.805          | 49.39         | n.a.   | BMB* |
| <b>Total:</b> |                 |           | 48.118        | 100.839         | 100.00        | 0.000  |      |

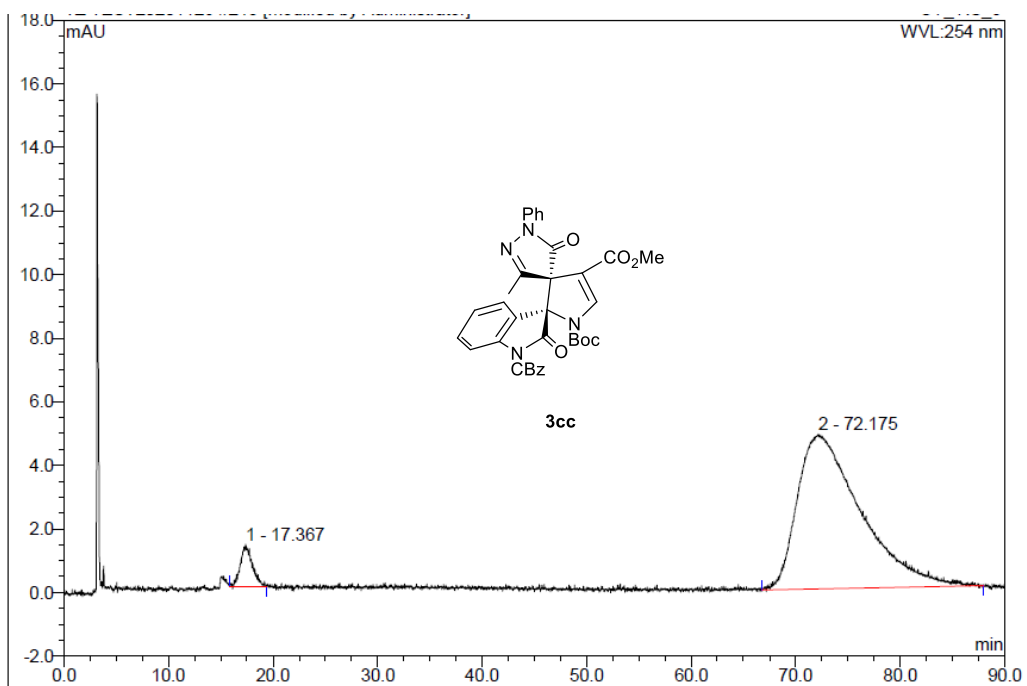

| No.           | Ret.Time<br>min | Peak Name | Height<br>mAU | Area<br>mAU*min | Rel.Area<br>% | Amount | Type |
|---------------|-----------------|-----------|---------------|-----------------|---------------|--------|------|
| 1             | 17.37           | n.a.      | 1.311         | 1.671           | 4.67          | n.a.   | BMB* |
| 2             | 72.18           | n.a.      | 4.870         | 34.122          | 95.33         | n.a.   | BMB* |
| <b>Total:</b> |                 |           | 6.182         | 35.793          | 100.00        | 0.000  |      |

### 9.3 NMR spectra and HPLC chromatograms of derivatives

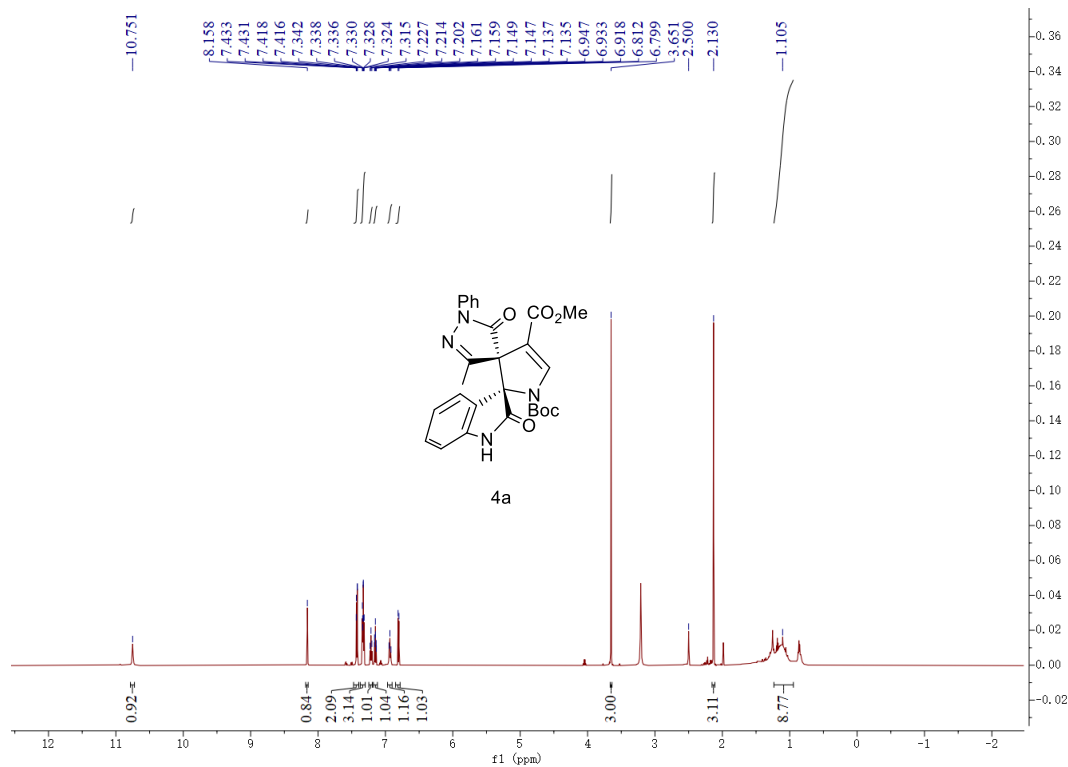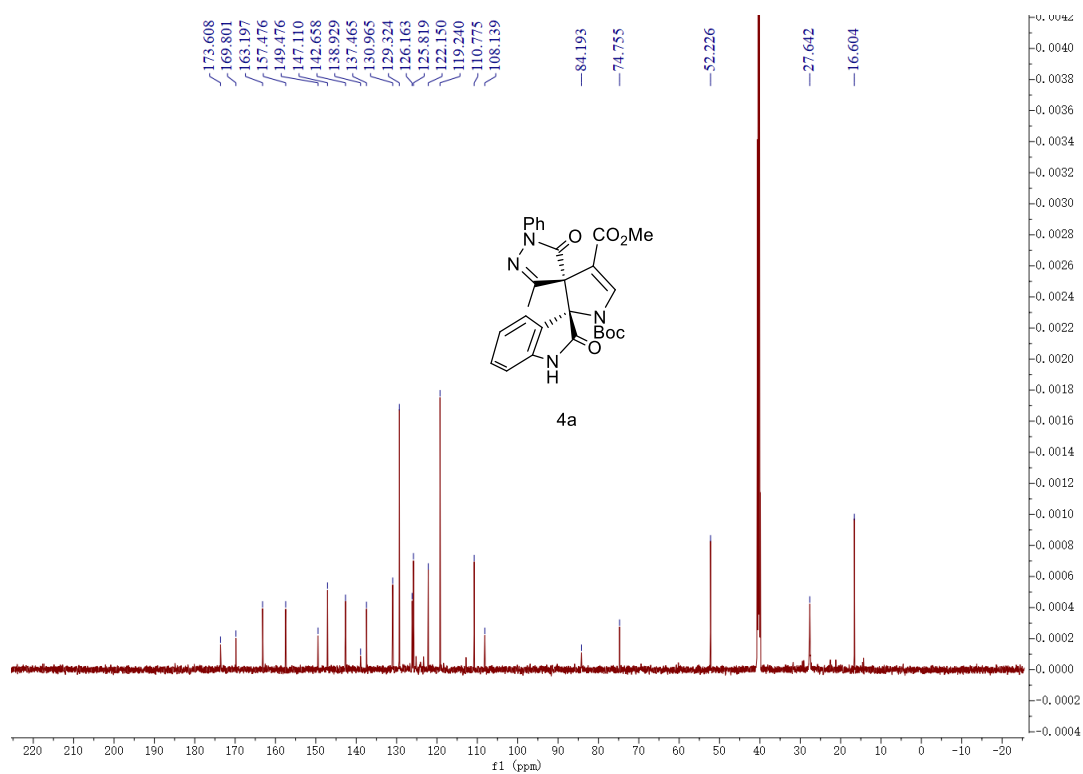

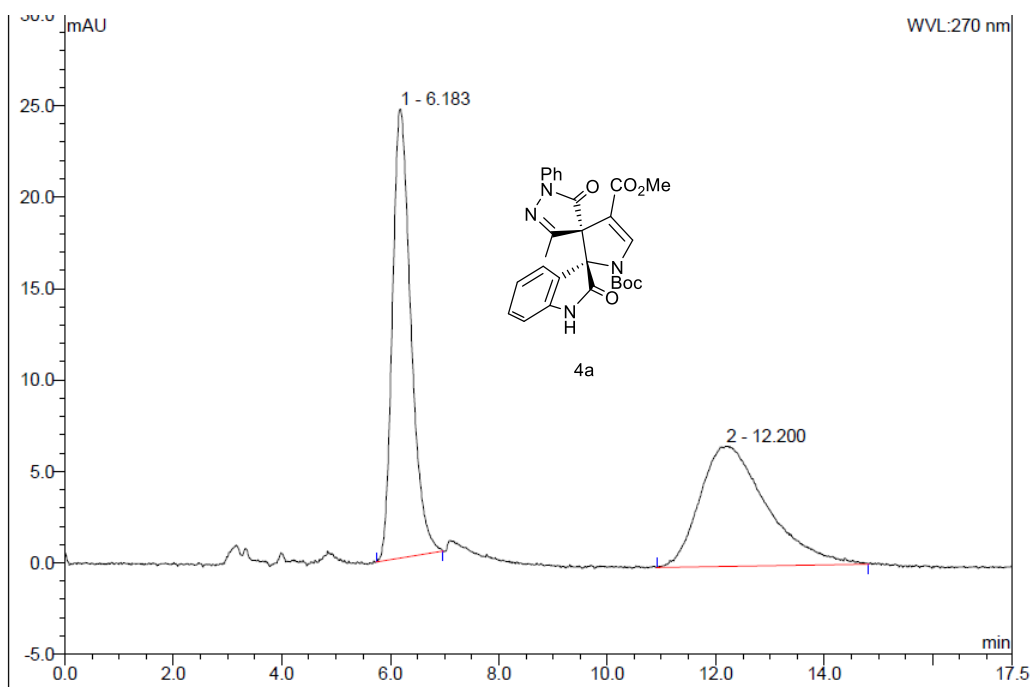

| No.           | Ret.Time min | Peak Name | Height mAU | Area mAU*min | Rel.Area % | Amount | Type |
|---------------|--------------|-----------|------------|--------------|------------|--------|------|
| 1             | 6.18         | n.a.      | 24.540     | 9.700        | 50.85      | n.a.   | BMB  |
| 2             | 12.20        | n.a.      | 6.561      | 9.375        | 49.15      | n.a.   | BMB* |
| <b>Total:</b> |              |           | 31.101     | 19.075       | 100.00     | 0.000  |      |

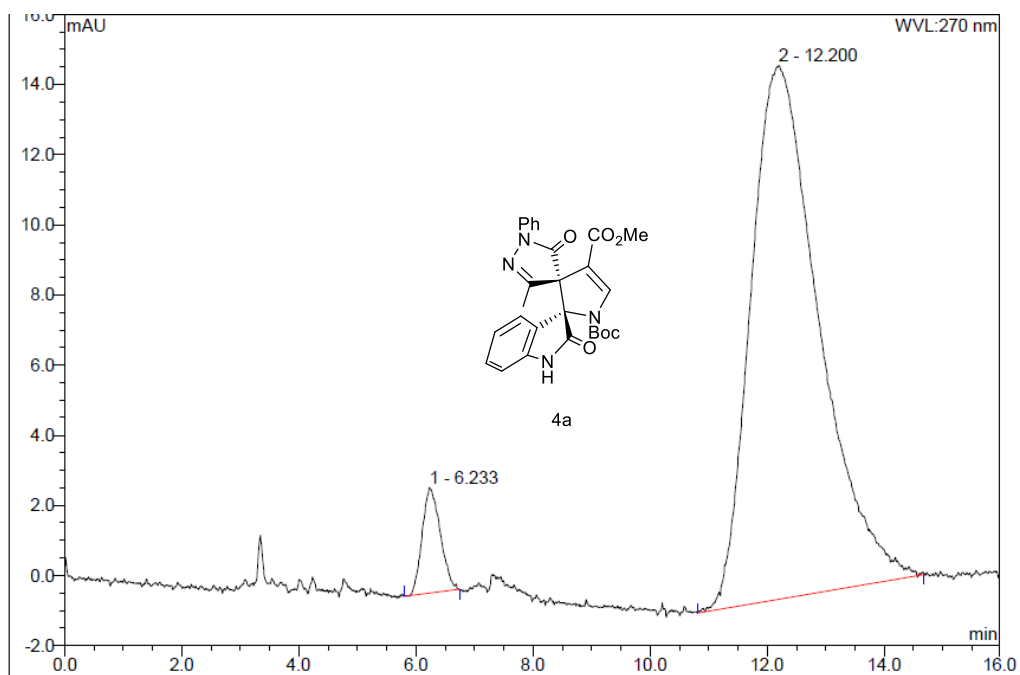

| No.           | Ret.Time min | Peak Name | Height mAU | Area mAU*min | Rel.Area % | Amount | Type |
|---------------|--------------|-----------|------------|--------------|------------|--------|------|
| 1             | 6.23         | n.a.      | 3.003      | 1.080        | 5.00       | n.a.   | BMB* |
| 2             | 12.20        | n.a.      | 15.222     | 20.530       | 95.00      | n.a.   | BMB* |
| <b>Total:</b> |              |           | 18.224     | 21.610       | 100.00     | 0.000  |      |

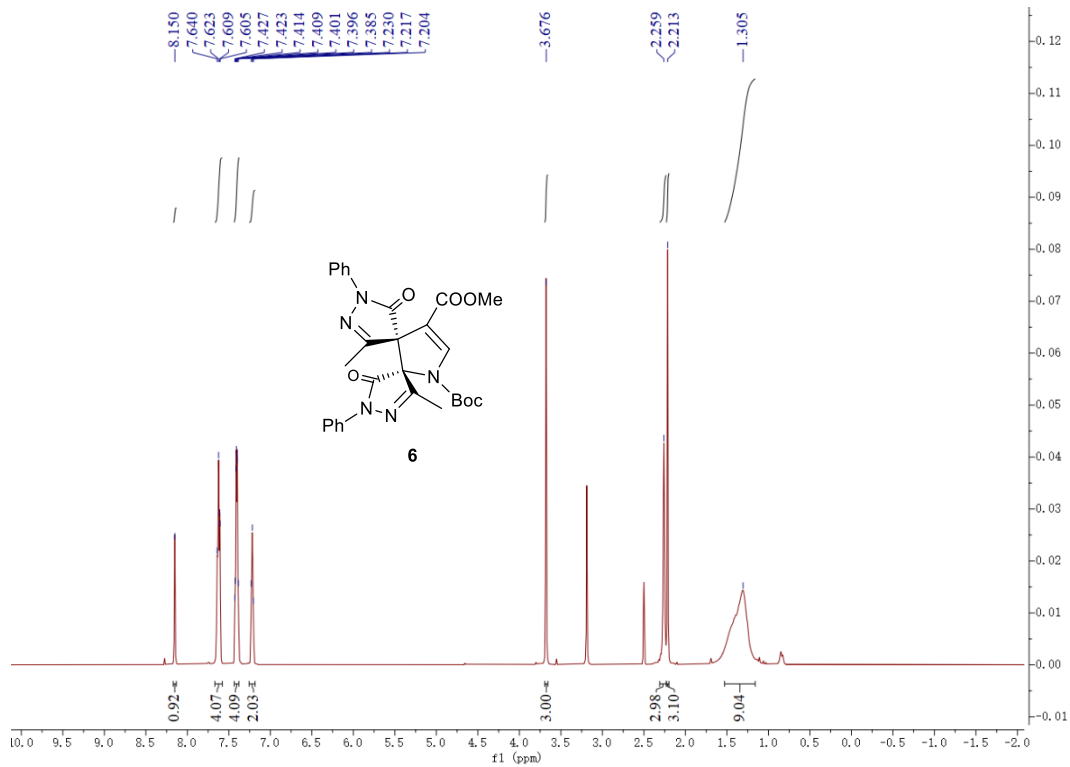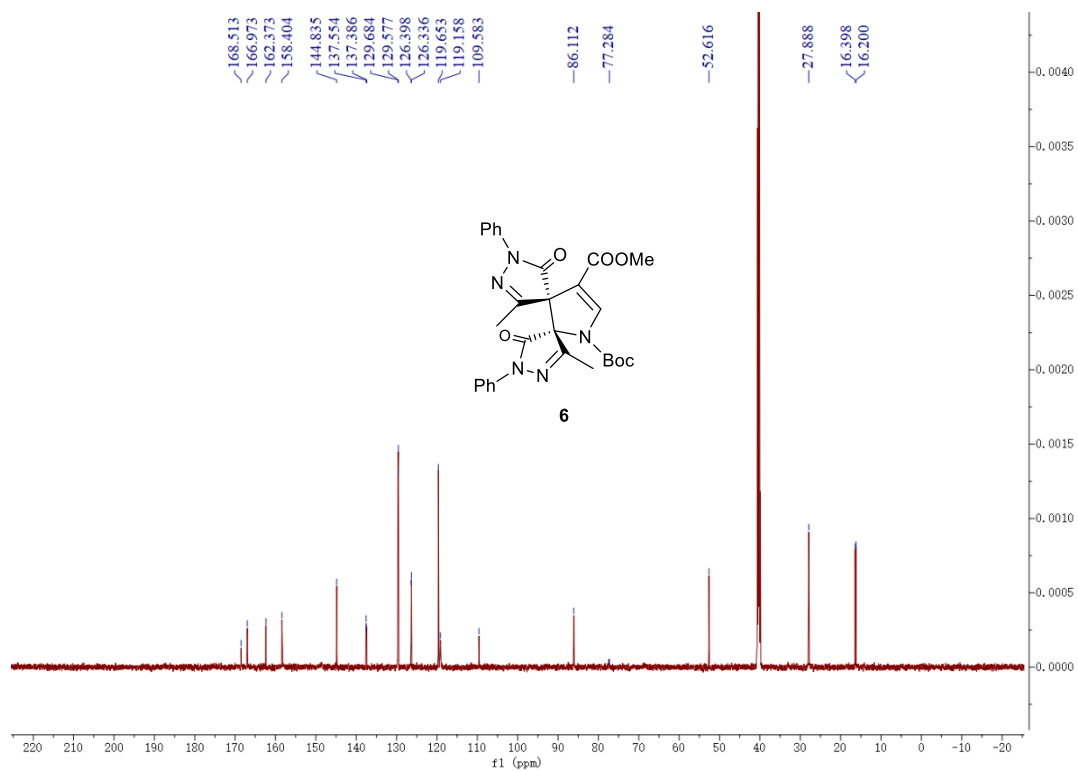

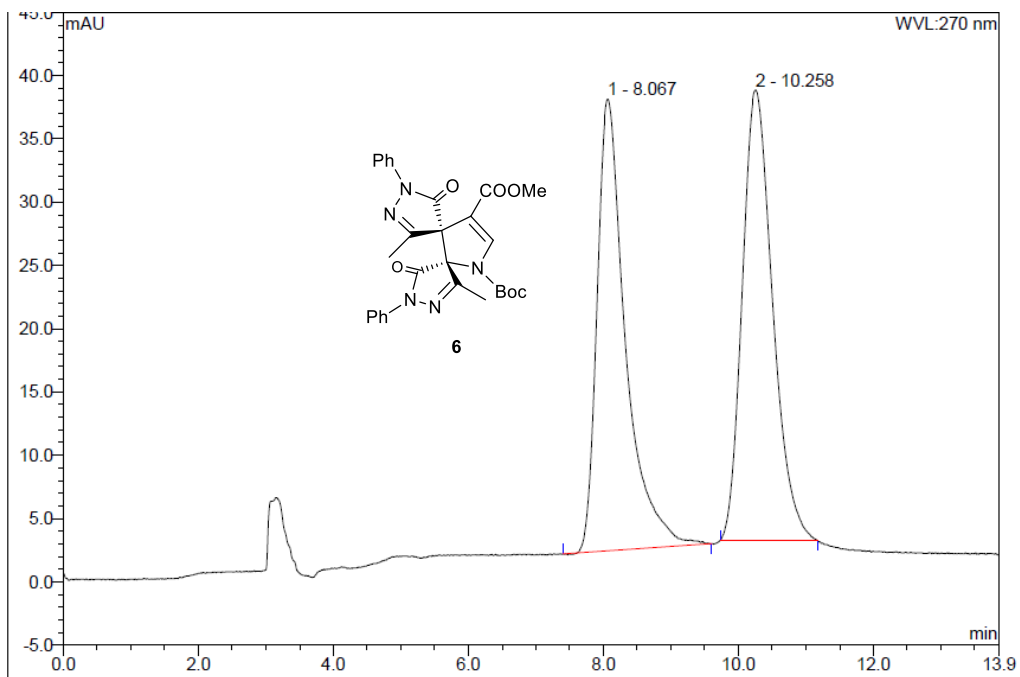

| No.           | Ret.Time<br>min | Peak Name | Height<br>mAU | Area<br>mAU*min | Rel.Area<br>% | Amount | Type |
|---------------|-----------------|-----------|---------------|-----------------|---------------|--------|------|
| 1             | 8.07            | n.a.      | 35.700        | 17.528          | 48.52         | n.a.   | BMB* |
| 2             | 10.26           | n.a.      | 35.601        | 18.601          | 51.48         | n.a.   | BMB* |
| <b>Total:</b> |                 |           | 71.301        | 36.129          | 100.00        | 0.000  |      |

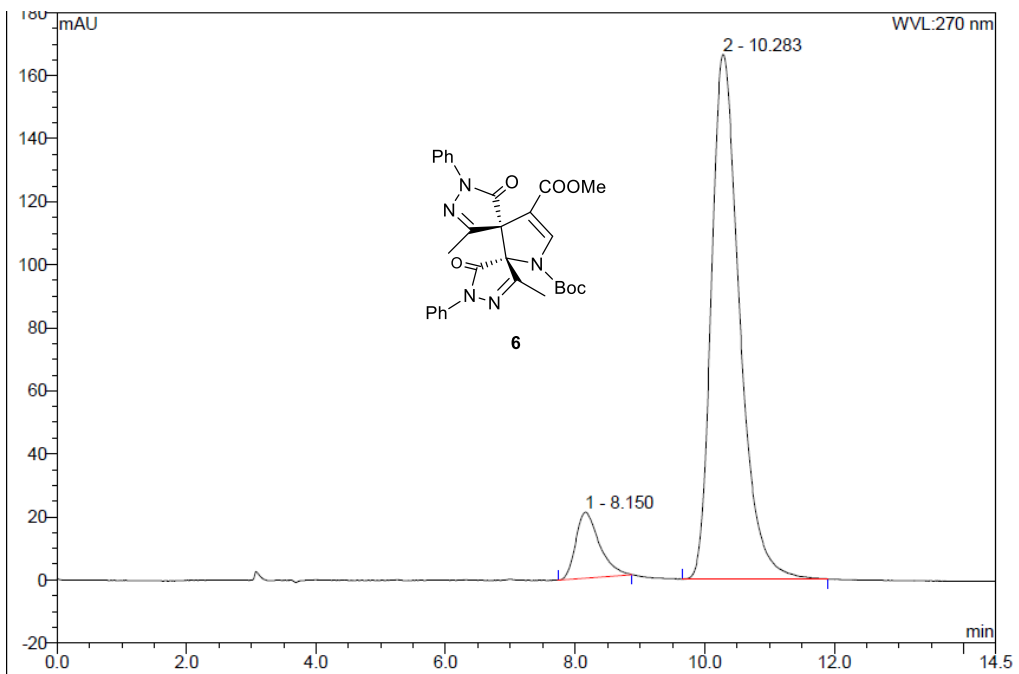

| No.           | Ret.Time<br>min | Peak Name | Height<br>mAU | Area<br>mAU*min | Rel.Area<br>% | Amount | Type |
|---------------|-----------------|-----------|---------------|-----------------|---------------|--------|------|
| 1             | 8.15            | n.a.      | 20.887        | 8.813           | 9.52          | n.a.   | BMB* |
| 2             | 10.28           | n.a.      | 166.478       | 83.765          | 90.48         | n.a.   | BMB  |
| <b>Total:</b> |                 |           | 187.365       | 92.577          | 100.00        | 0.000  |      |

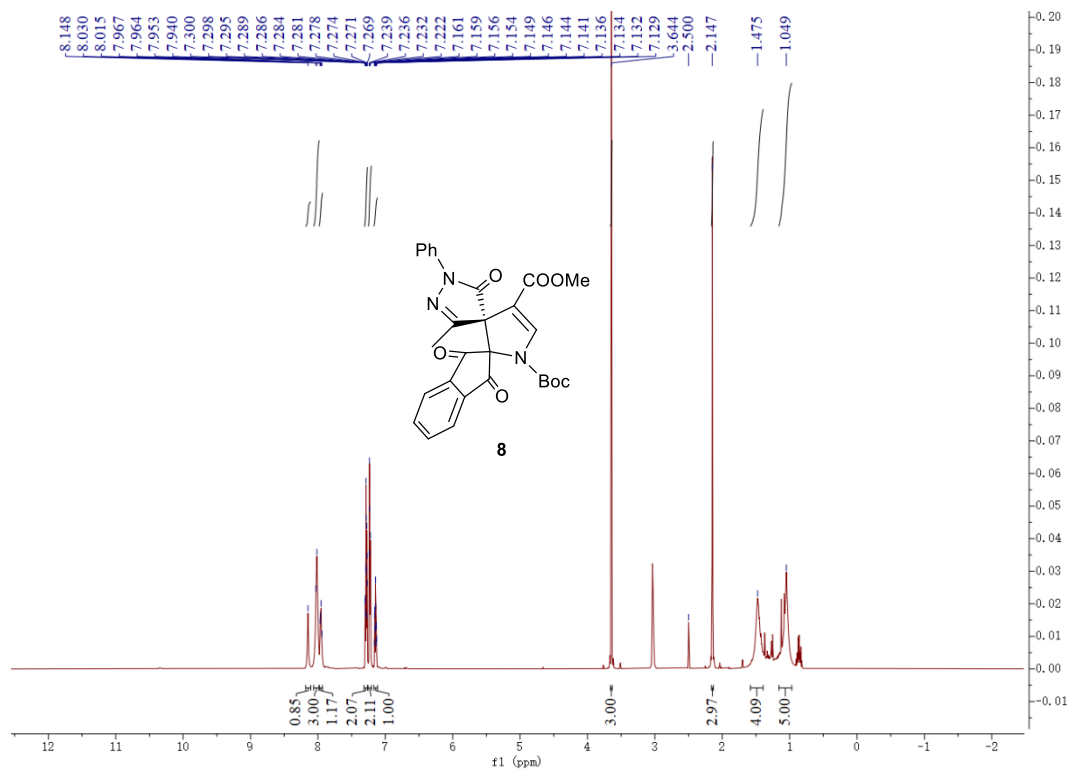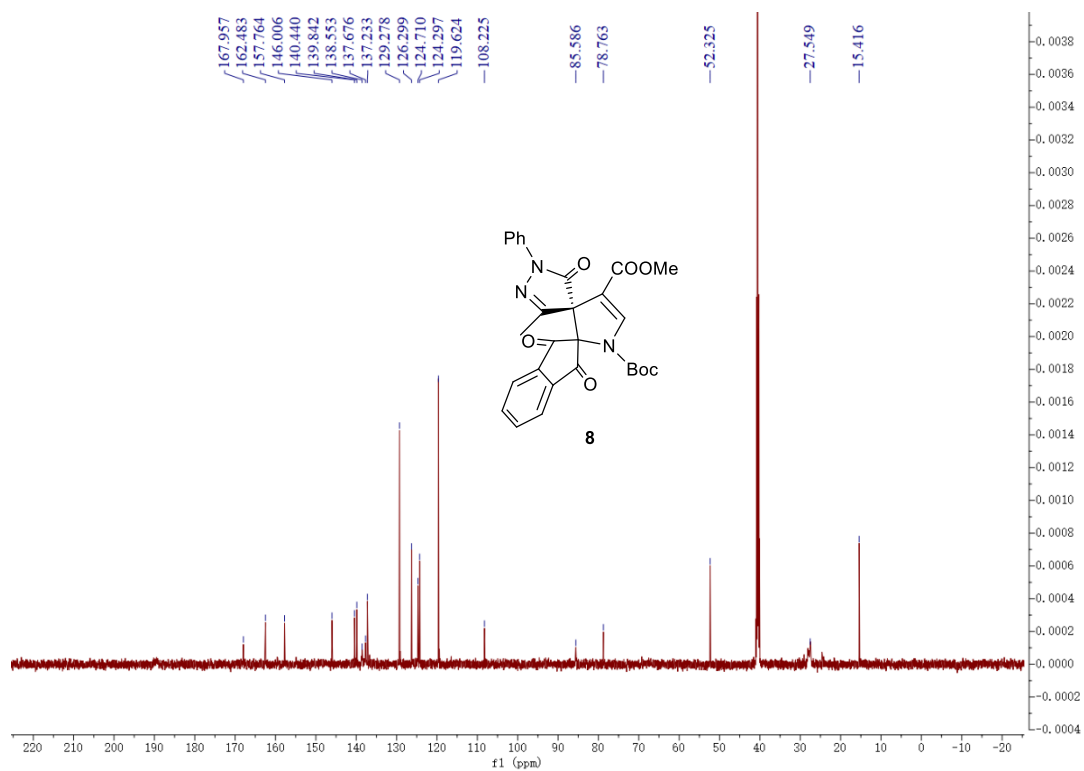

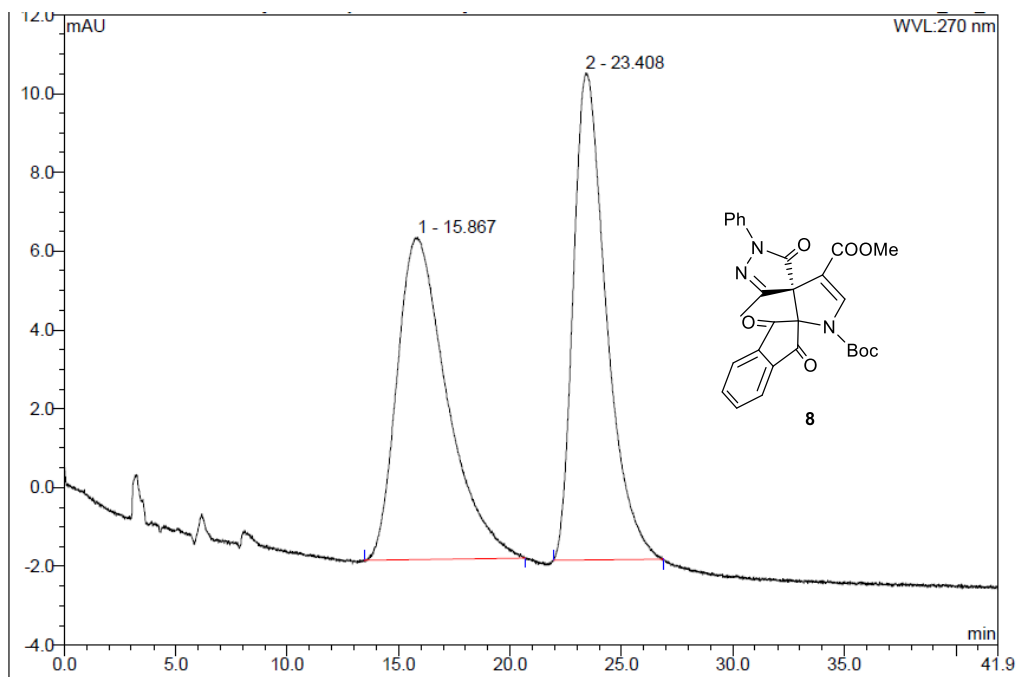

| No.           | Ret.Time min | Peak Name | Height mAU | Area mAU*min | Rel.Area % | Amount | Type |
|---------------|--------------|-----------|------------|--------------|------------|--------|------|
| 1             | 15.87        | n.a.      | 8.170      | 21.251       | 49.99      | n.a.   | BMB* |
| 2             | 23.41        | n.a.      | 12.370     | 21.257       | 50.01      | n.a.   | BMB* |
| <b>Total:</b> |              |           | 20.540     | 42.508       | 100.00     | 0.000  |      |

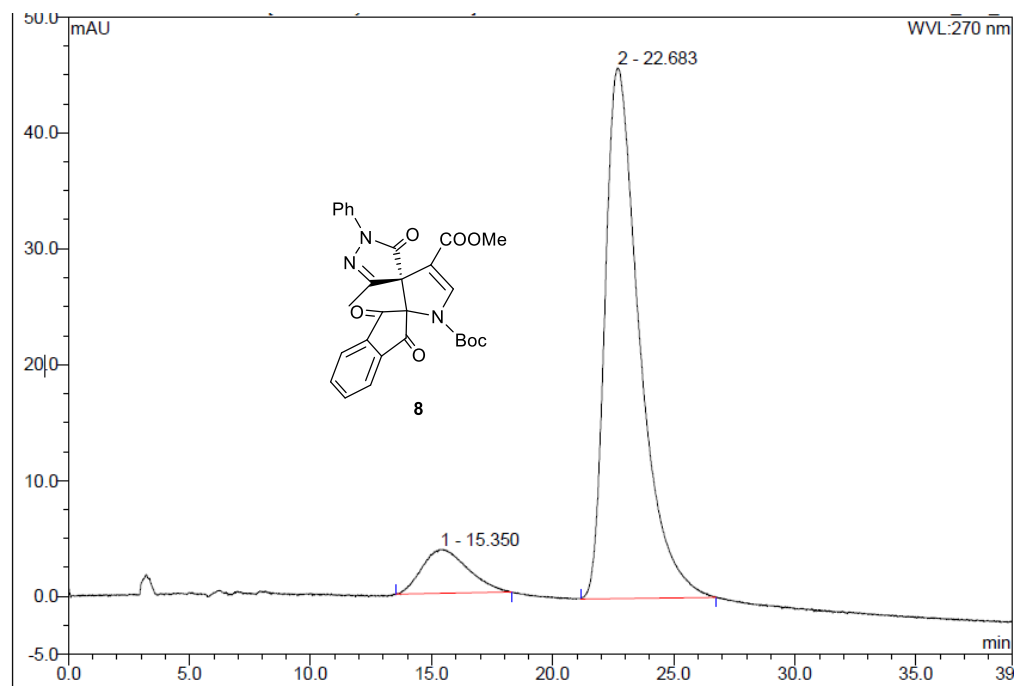

| No.           | Ret.Time min | Peak Name | Height mAU | Area mAU*min | Rel.Area % | Amount | Type |
|---------------|--------------|-----------|------------|--------------|------------|--------|------|
| 1             | 15.35        | n.a.      | 3.802      | 8.309        | 9.94       | n.a.   | BMB* |
| 2             | 22.68        | n.a.      | 45.771     | 75.263       | 90.06      | n.a.   | BMB* |
| <b>Total:</b> |              |           | 49.573     | 83.572       | 100.00     | 0.000  |      |



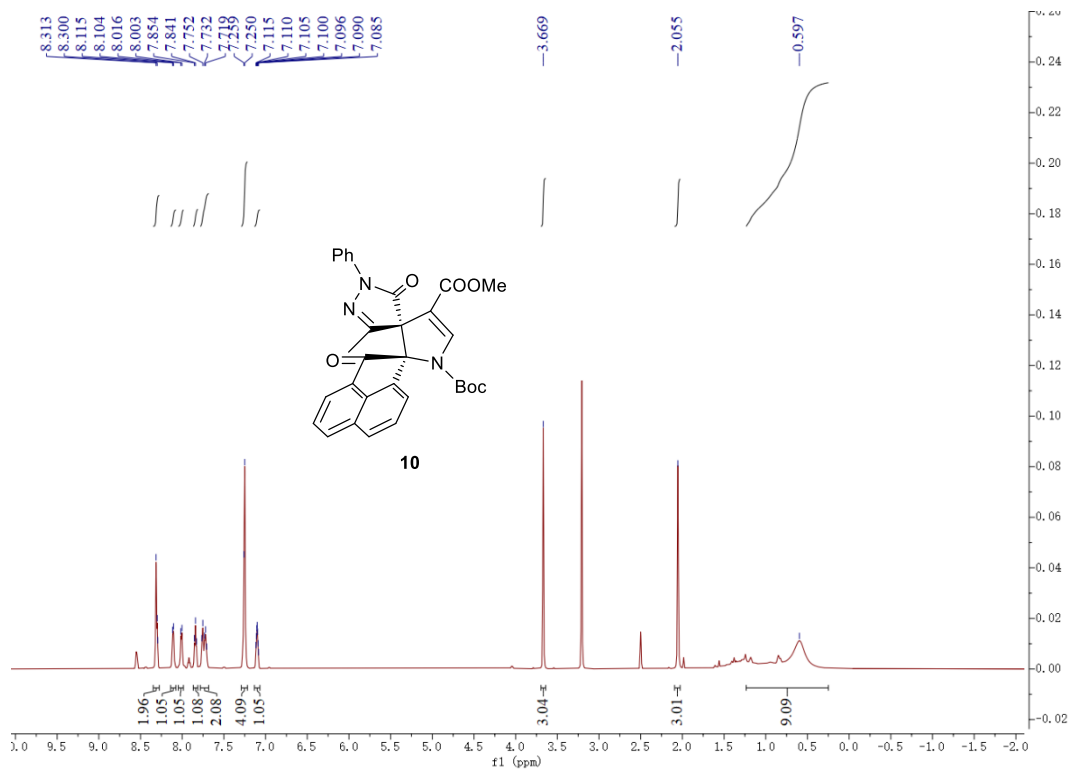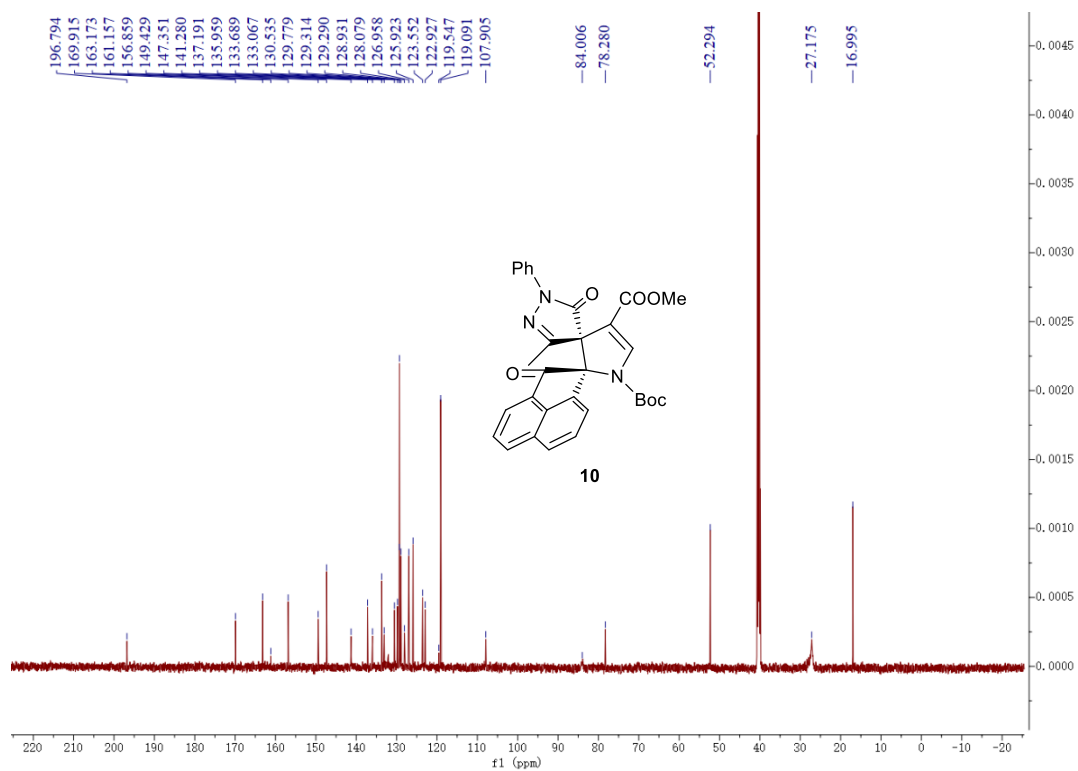

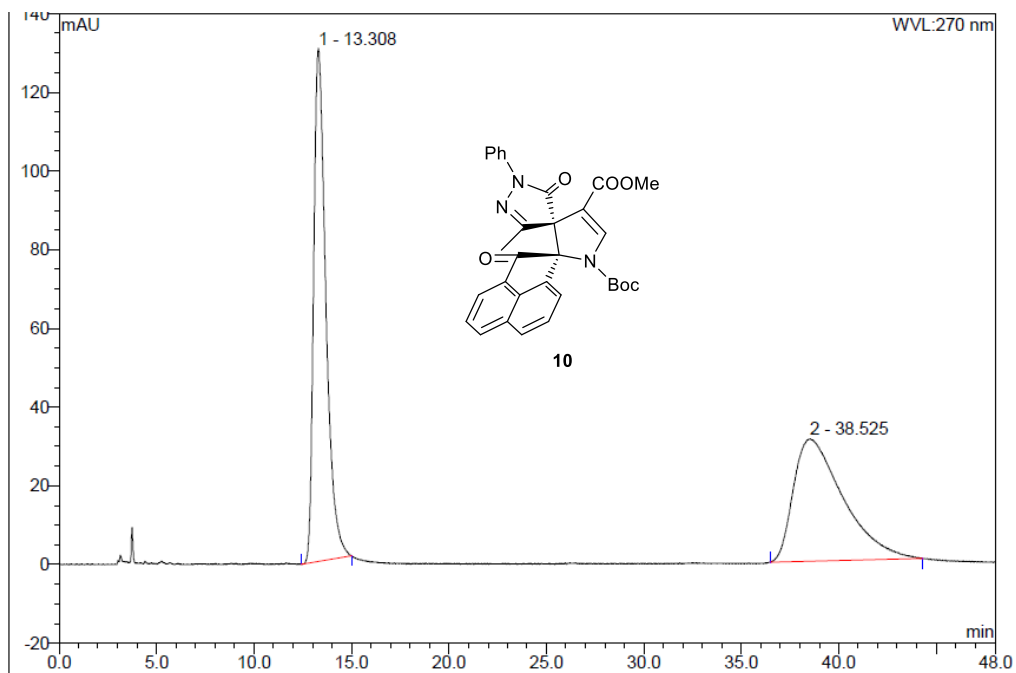

| No.           | Ret.Time min | Peak Name | Height mAU | Area mAU*min | Rel.Area % | Amount | Type |
|---------------|--------------|-----------|------------|--------------|------------|--------|------|
| 1             | 13.31        | n.a.      | 130.405    | 94.347       | 50.66      | n.a.   | BMB* |
| 2             | 38.53        | n.a.      | 31.145     | 91.887       | 49.34      | n.a.   | BMB* |
| <b>Total:</b> |              |           | 161.550    | 186.234      | 100.00     | 0.000  |      |

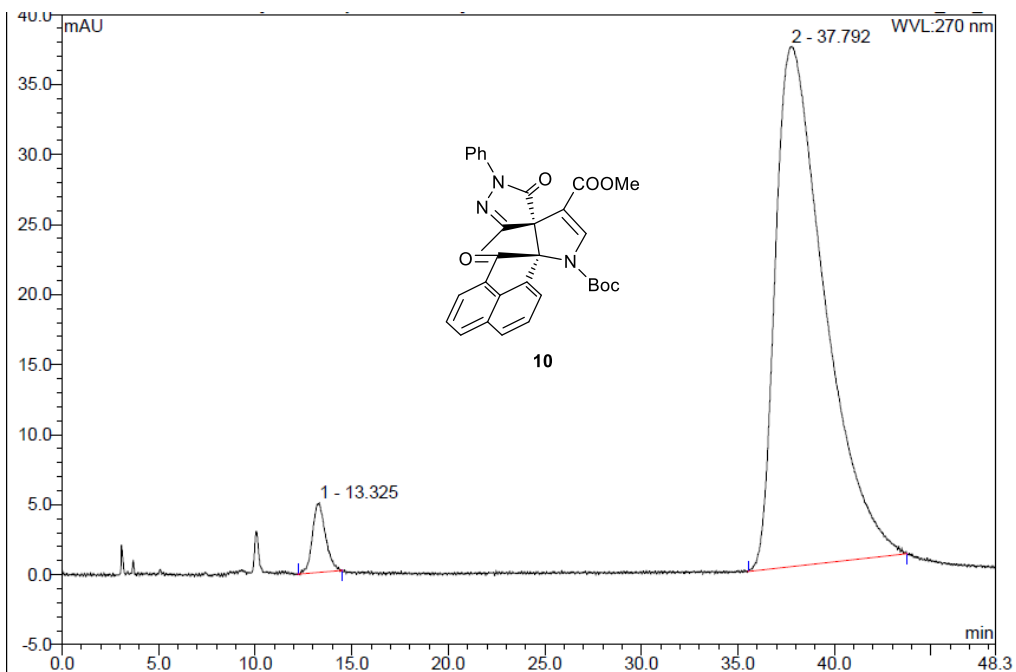

| No.           | Ret.Time min | Peak Name | Height mAU | Area mAU*min | Rel.Area % | Amount | Type |
|---------------|--------------|-----------|------------|--------------|------------|--------|------|
| 1             | 13.33        | n.a.      | 4.973      | 3.885        | 3.42       | n.a.   | BMB* |
| 2             | 37.79        | n.a.      | 37.179     | 109.864      | 96.58      | n.a.   | BMB* |
| <b>Total:</b> |              |           | 42.151     | 113.750      | 100.00     | 0.000  |      |

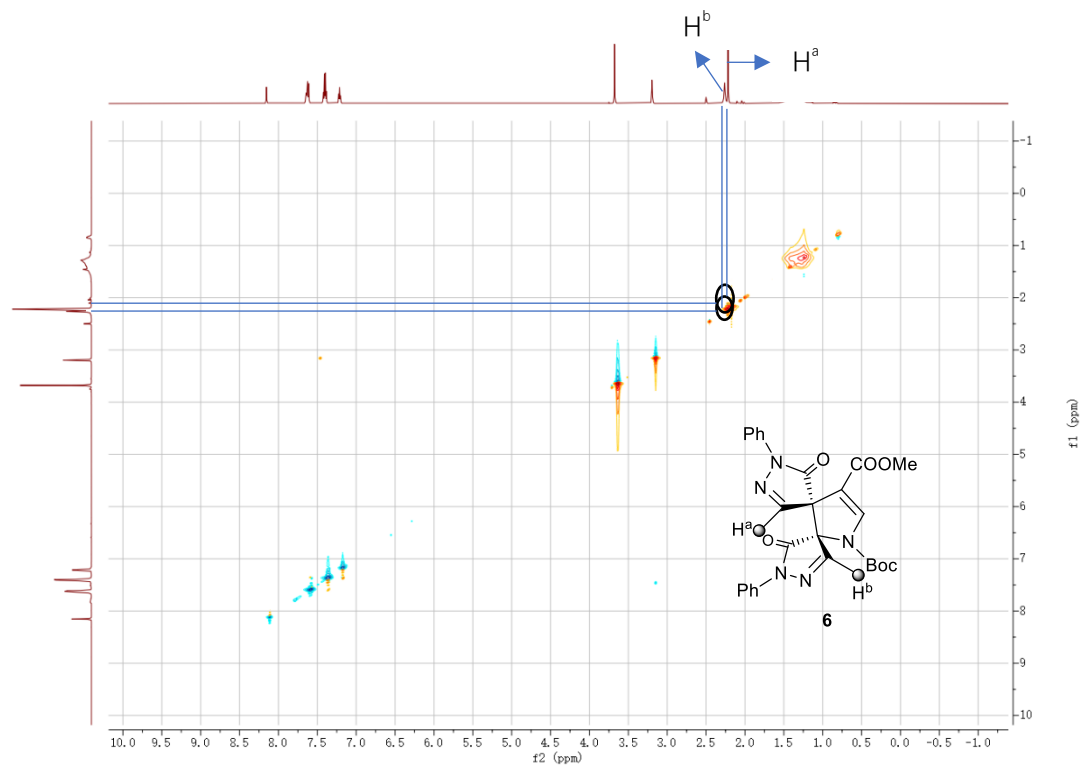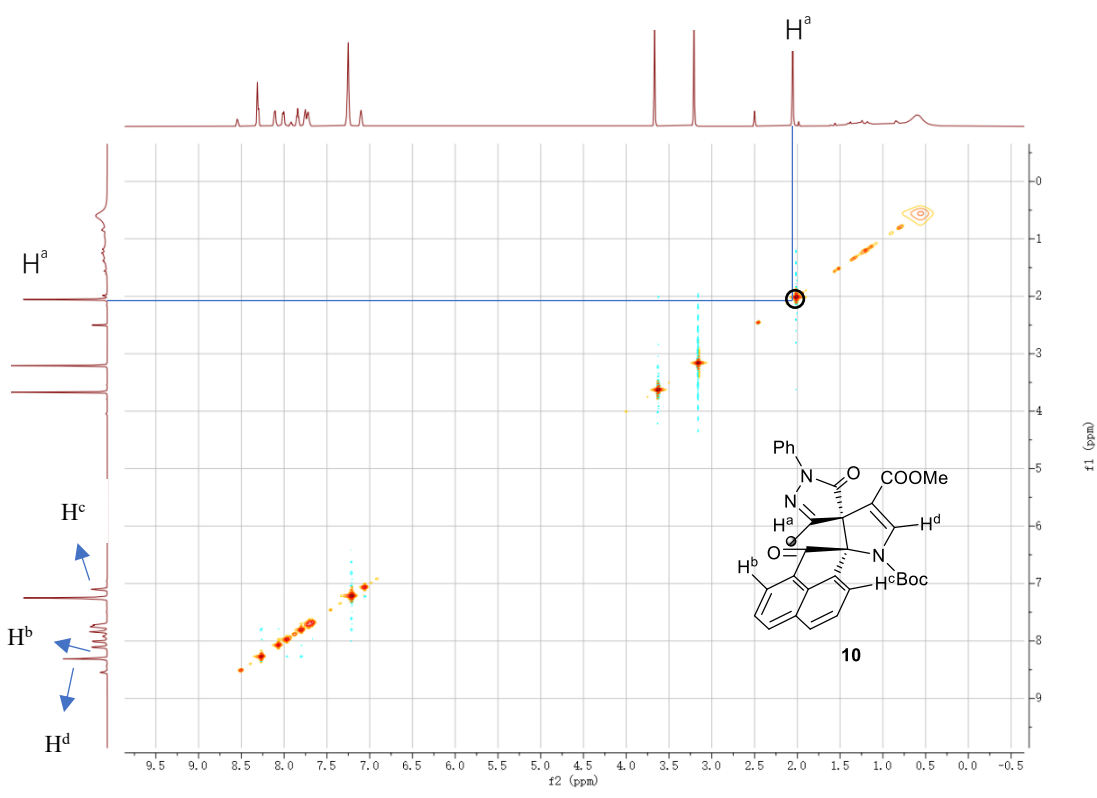

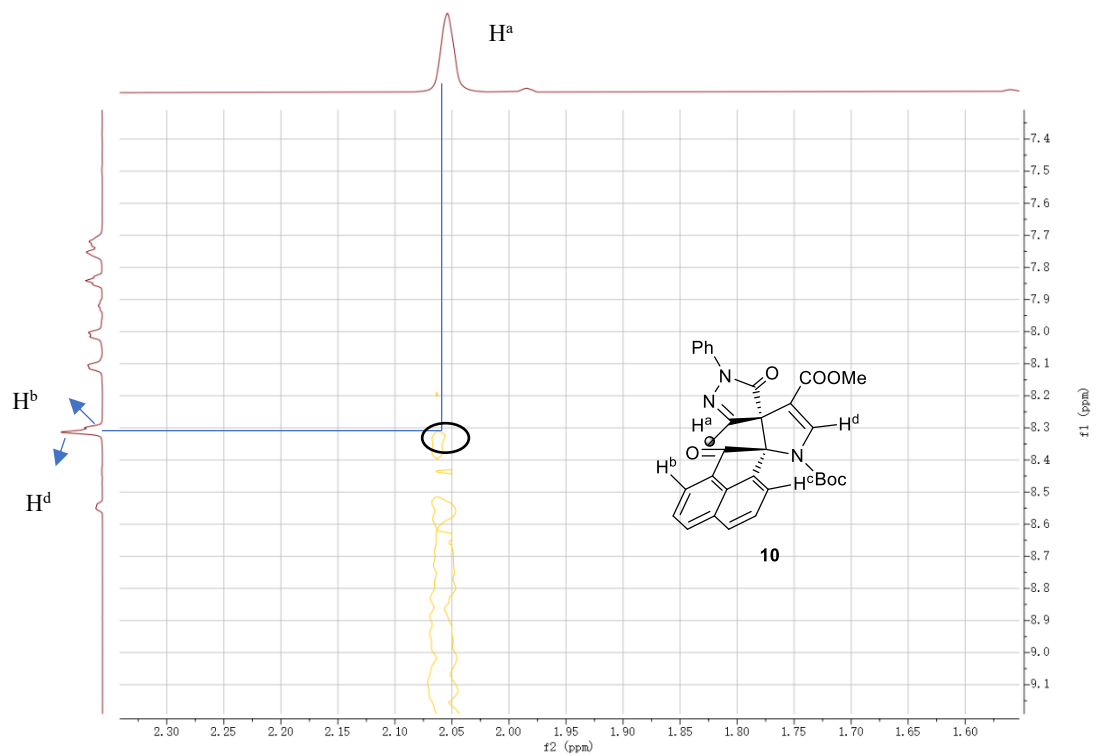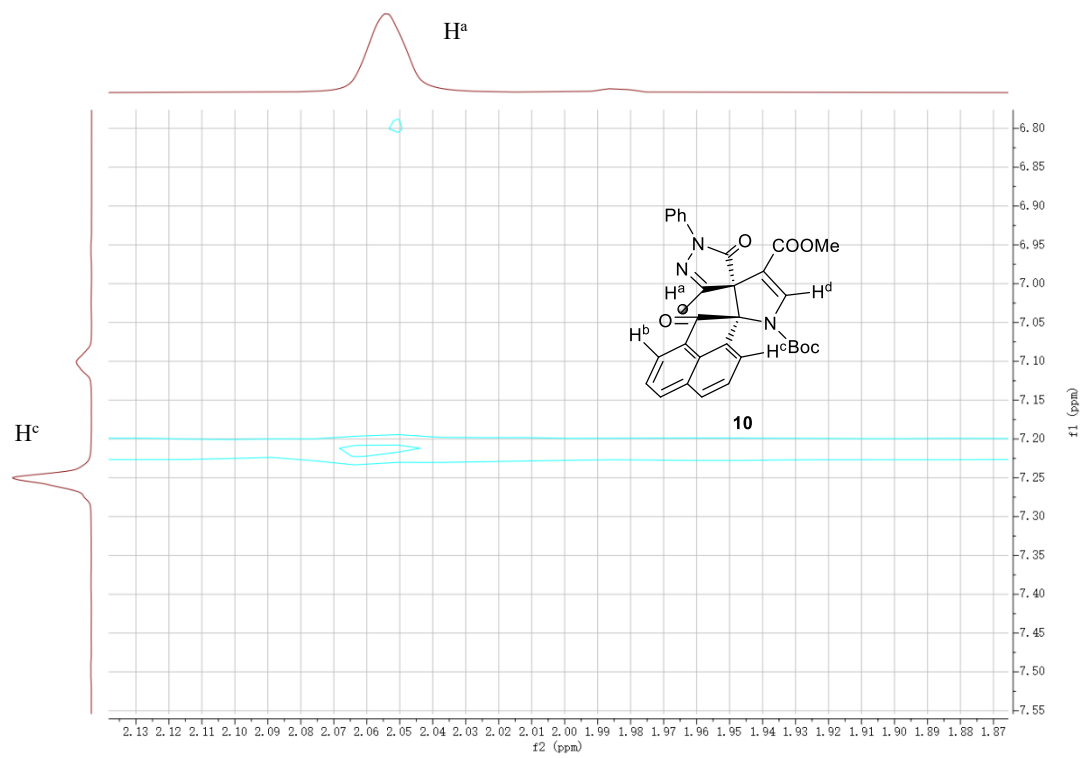

## 9.4 HPLC chromatograms of gram-scale reaction

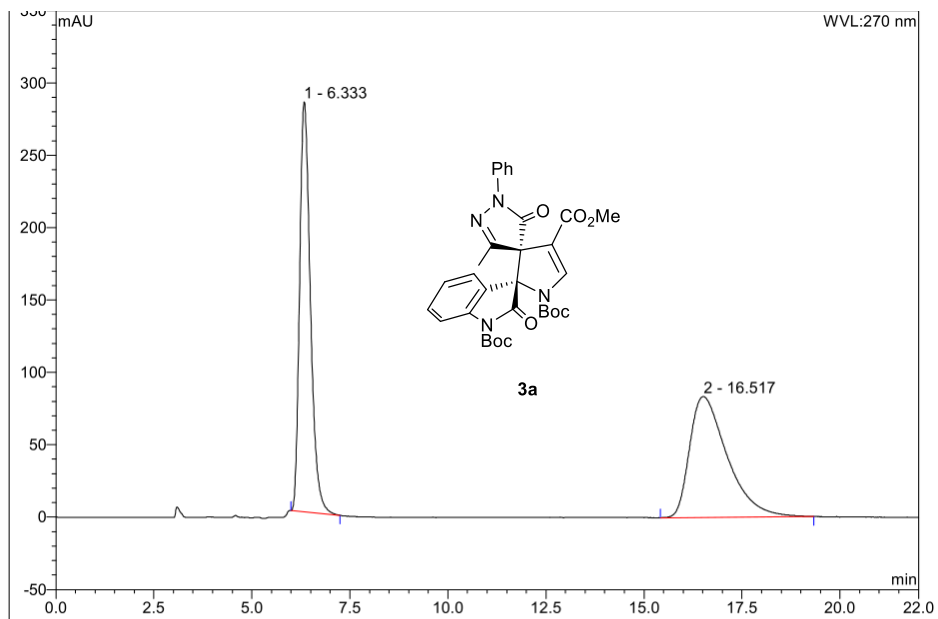

| No.           | Ret.Time<br>min | Peak Name | Height<br>mAU | Area<br>mAU*min | Rel.Area<br>% | Amount | Type |
|---------------|-----------------|-----------|---------------|-----------------|---------------|--------|------|
| 1             | 6.33            | n.a.      | 283.297       | 90.137          | 49.24         | n.a.   | BMB  |
| 2             | 16.52           | n.a.      | 83.525        | 92.927          | 50.76         | n.a.   | BMB  |
| <b>Total:</b> |                 |           | 366.822       | 183.065         | 100.00        | 0.000  |      |

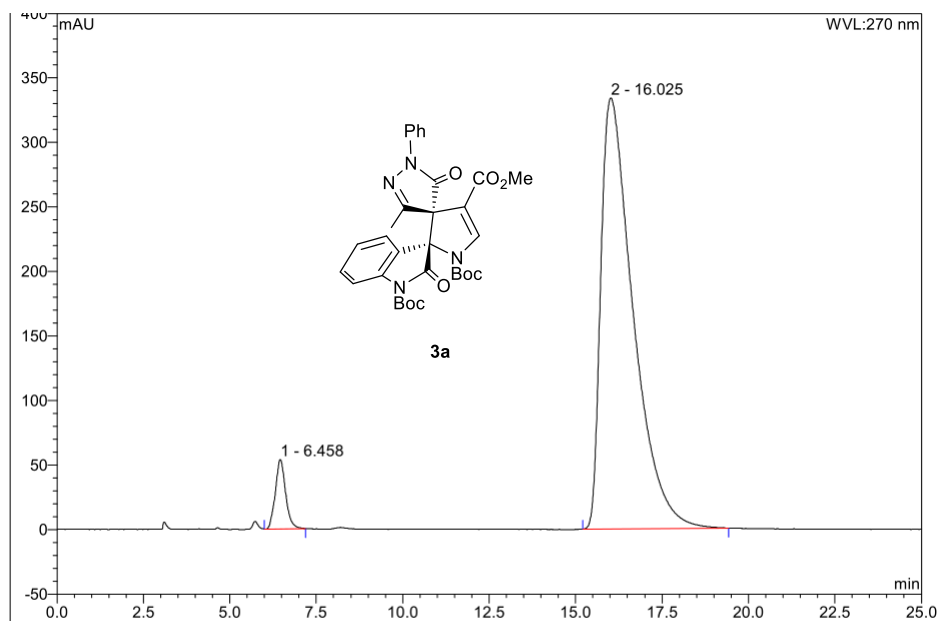

| No.           | Ret.Time<br>min | Peak Name | Height<br>mAU | Area<br>mAU*min | Rel.Area<br>% | Amount | Type |
|---------------|-----------------|-----------|---------------|-----------------|---------------|--------|------|
| 1             | 6.46            | n.a.      | 53.882        | 18.659          | 4.92          | n.a.   | BMB  |
| 2             | 16.03           | n.a.      | 334.086       | 360.235         | 95.08         | n.a.   | BMB  |
| <b>Total:</b> |                 |           | 387.968       | 378.894         | 100.00        | 0.000  |      |

**1,1'-di-tert-butyl 4'-methyl (3*R*,3'*R*)-2,5''-dioxo-1'',3''-diphenyl-1'',5''-dihydro-1''H-dispiro[indoline-3,2'-pyrrole-3',4''-pyrazole]-1,1',4'-tricarboxylate (3dd).**

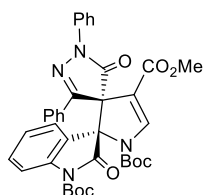

31.9 mg, 48% yield, white solid, mp 97.5 – 99.1 °C; HPLC (Daicel Chiralpak OD-H, n-hexane/2-propanol = 94:6, 1.0 mL/min, at 270 nm):  $t_R = 7.36$  min (minor),  $t_R = 24.03$  min (major); 89% *ee*,  $[\alpha]_D^{20} = -250.3$  ( $c = 0.45$ , MeOH).  $^1\text{H NMR}$  (600 MHz, DMSO- $d_6$ , 60 °C)  $\delta$  8.32 (s, 1H), 7.72 (d,  $J = 8.4$  Hz, 1H), 7.63 – 7.55 (m, 2H), 7.53 – 7.47 (m, 2H), 7.47 – 7.41 (m, 4H), 7.40 – 7.34 (m, 3H), 7.22 (t,  $J = 7.2$ , 1H), 7.20 – 7.15 (m, 1H), 3.65 (s, 3H), 1.32 (s, 9H), 0.97 (s, 9H).  $^{13}\text{C NMR}$  (150 MHz, DMSO- $d_6$ , 60 °C)  $\delta$  169.6, 169.2, 163.4, 154.5, 149.3, 148.1, 146.7, 139.7, 136.9, 131.5, 131.3, 130.8, 129.5, 128.8, 127.8, 126.6, 125.8, 124.8, 119.8, 114.9, 109.1, 84.8, 74.6, 52.5, 27.9, 27.5. HRMS (ESI-TOF)  $m/z$ :  $[\text{M}+\text{Na}]^+$  Calcd for  $\text{C}_{37}\text{H}_{36}\text{N}_4\text{O}_8$  687.2425; Found 687.2419.

**1,1'-di-tert-butyl 4'-methyl (3*R*,3'*R*)-3''-isopropyl-2,5''-dioxo-1''-phenyl-1'',5''-dihydro-1''H-dispiro[indoline-3,2'-pyrrole-3',4''-pyrazole]-1,1',4'-tricarboxylate (3ee).**

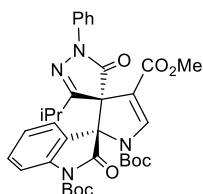

15.0 mg, 24% yield, white solid, mp 78.5 – 80.2 °C; HPLC (Daicel Chiralpak OD-H, n-hexane/2-propanol = 94:6, 1.0 mL/min, at 270 nm):  $t_R = 5.16$  min (minor),  $t_R = 14.51$  min (major); 76% *ee*,  $[\alpha]_D^{20} = -220.1$  ( $c = 0.45$ , MeOH).  $^1\text{H NMR}$  (600 MHz, DMSO- $d_6$ , 60 °C)  $\delta$  8.19 (s, 1H), 7.67 (d,  $J = 8.4$  Hz, 1H), 7.46 (d,  $J = 7.8$  Hz, 1H), 7.43 – 7.28 (m, 5H), 7.20 – 7.16 (m, 2H), 3.63 (s, 3H), 2.95 (q,  $J = 7.2$  Hz, 1H), 1.54 (s, 9H), 1.24 (d,  $J = 6.6$  Hz, 3H), 1.11 (s, 9H), 1.03 (d,  $J = 6.6$  Hz, 3H).  $^{13}\text{C NMR}$  (150 MHz, DMSO- $d_6$ , 60 °C)  $\delta$  170.8, 169.2, 163.3, 151.6, 149.1, 148.2, 146.2, 139.1, 137.4, 131.5, 129.4, 126.3, 126.2, 124.8, 119.5, 114.7, 108.9, 85.8, 74.6, 52.3, 30.3, 28.0, 27.5, 22.6, 20.3. HRMS (ESI-TOF)  $m/z$ :  $[\text{M}+\text{Na}]^+$  Calcd for  $\text{C}_{34}\text{H}_{38}\text{N}_4\text{O}_8$  653.2582; Found 653.2580.

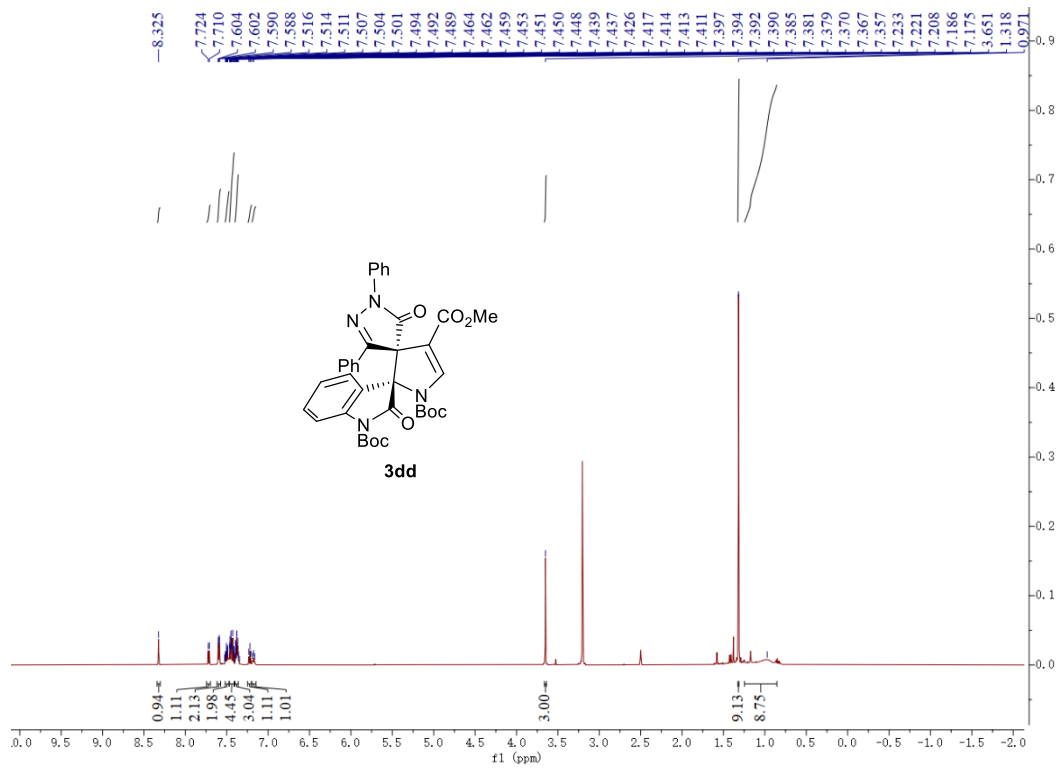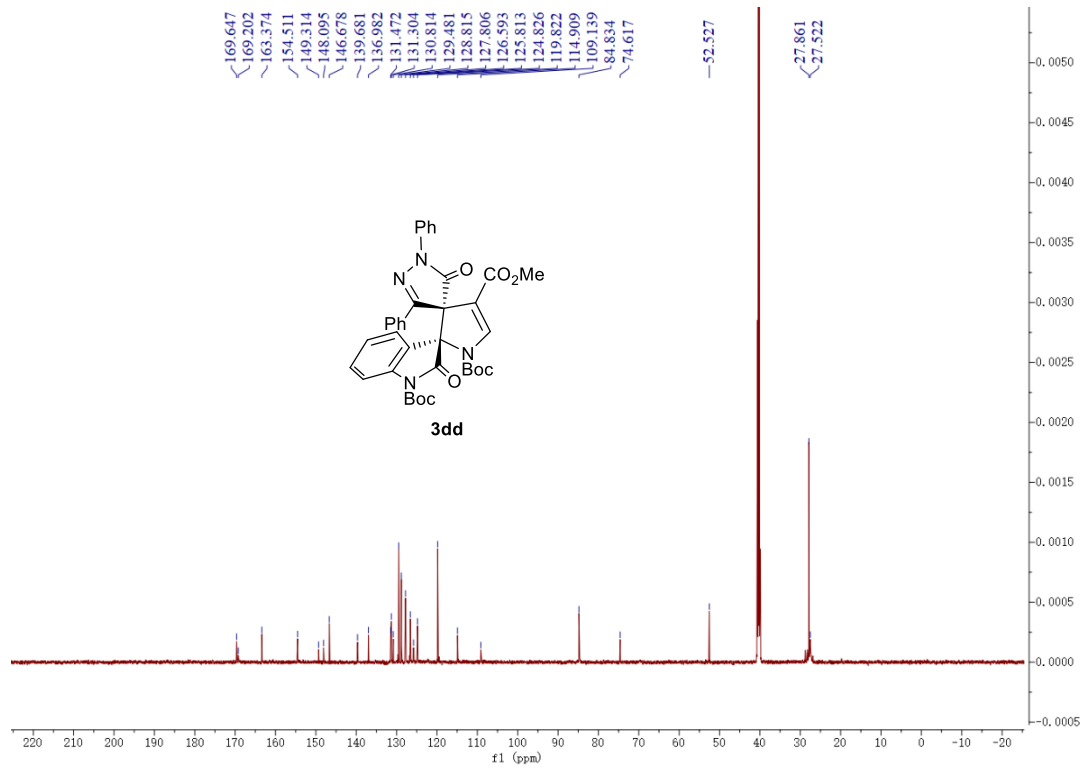

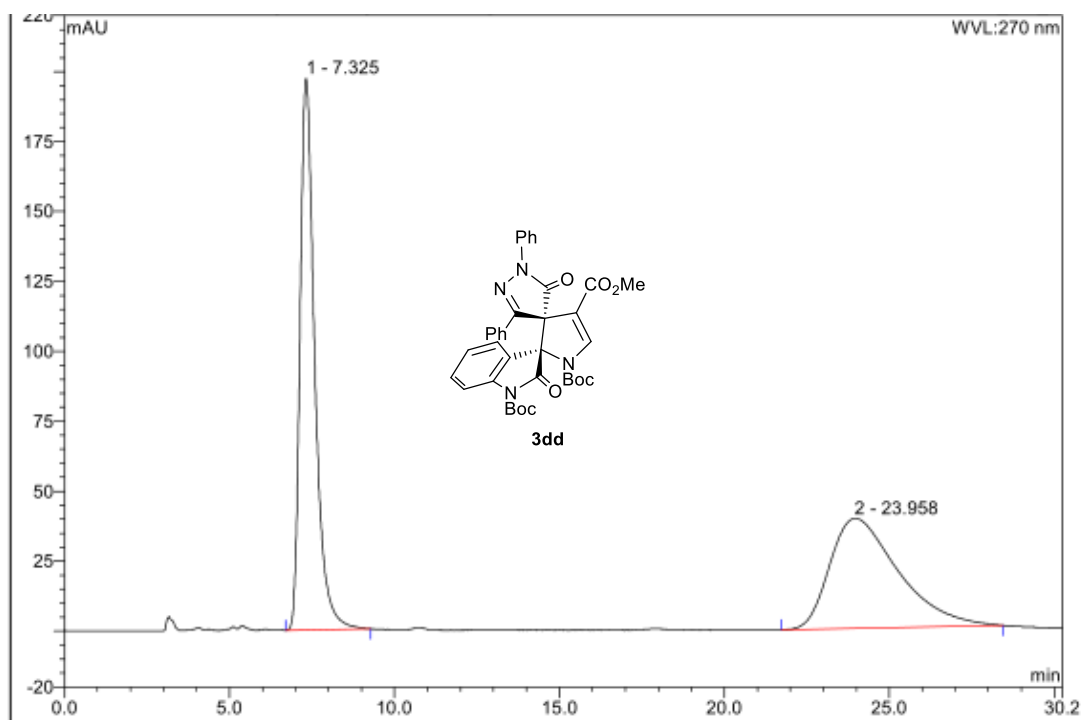

| No.           | Ret.Time min | Peak Name | Height mAU | Area mAU*min | Rel.Area % | Amount | Type |
|---------------|--------------|-----------|------------|--------------|------------|--------|------|
| 1             | 7.33         | n.a.      | 197.280    | 102.081      | 51.86      | n.a.   | BMB  |
| 2             | 23.96        | n.a.      | 39.377     | 94.753       | 48.14      | n.a.   | BMB* |
| <b>Total:</b> |              |           | 236.656    | 196.833      | 100.00     | 0.000  |      |

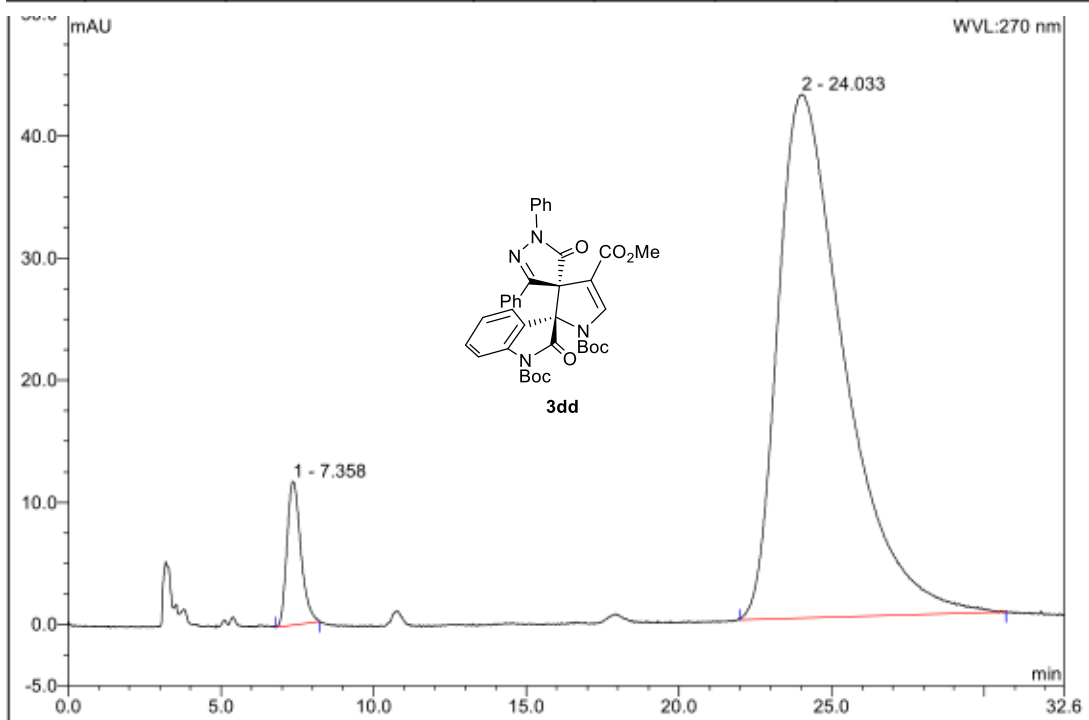

| No.           | Ret.Time min | Peak Name | Height mAU | Area mAU*min | Rel.Area % | Amount | Type |
|---------------|--------------|-----------|------------|--------------|------------|--------|------|
| 1             | 7.36         | n.a.      | 11.763     | 6.181        | 5.42       | n.a.   | BMB  |
| 2             | 24.03        | n.a.      | 42.870     | 107.932      | 94.58      | n.a.   | BMB* |
| <b>Total:</b> |              |           | 54.634     | 114.112      | 100.00     | 0.000  |      |



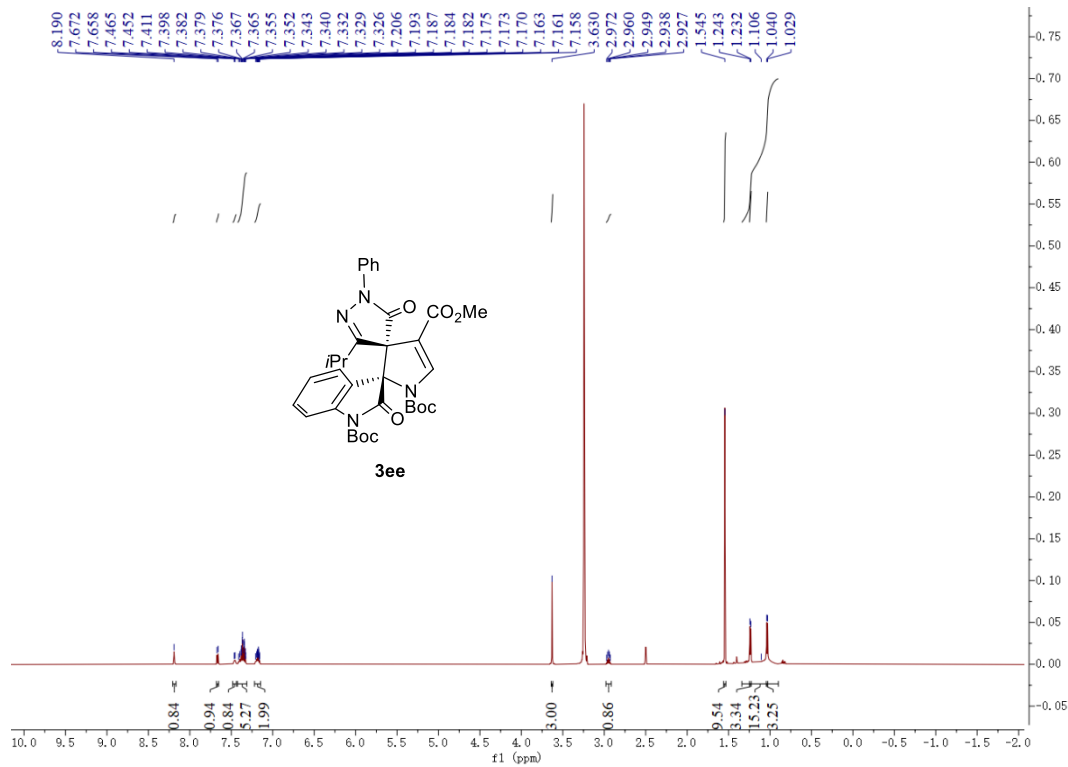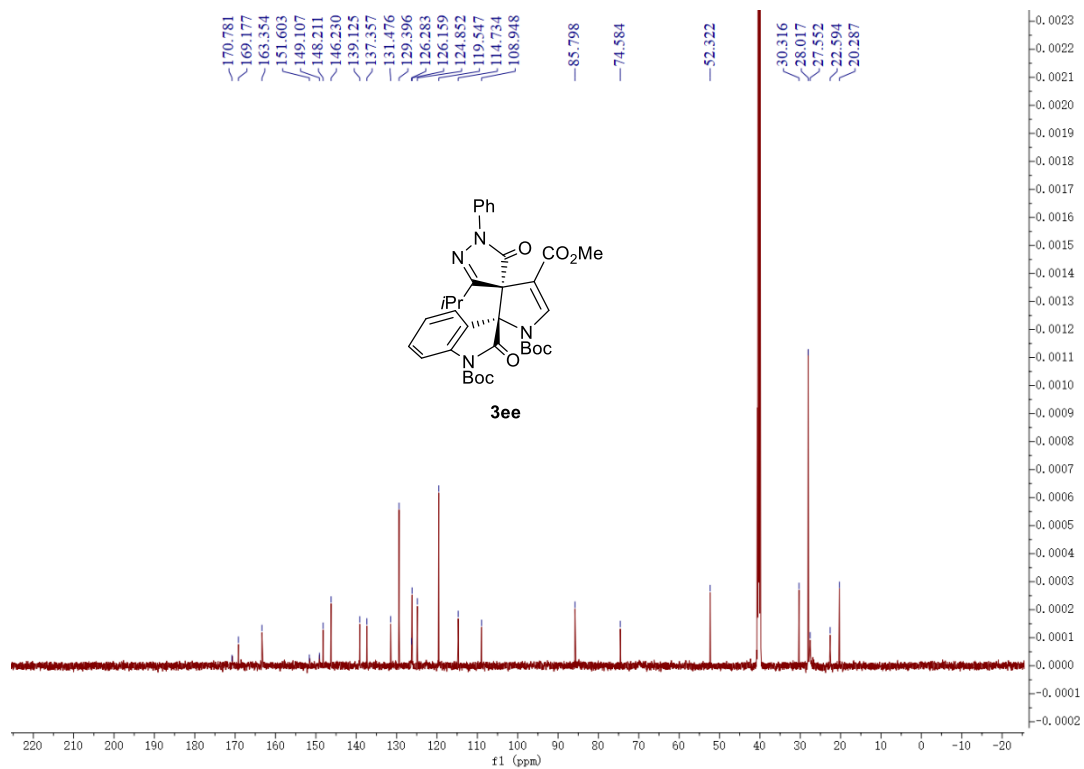

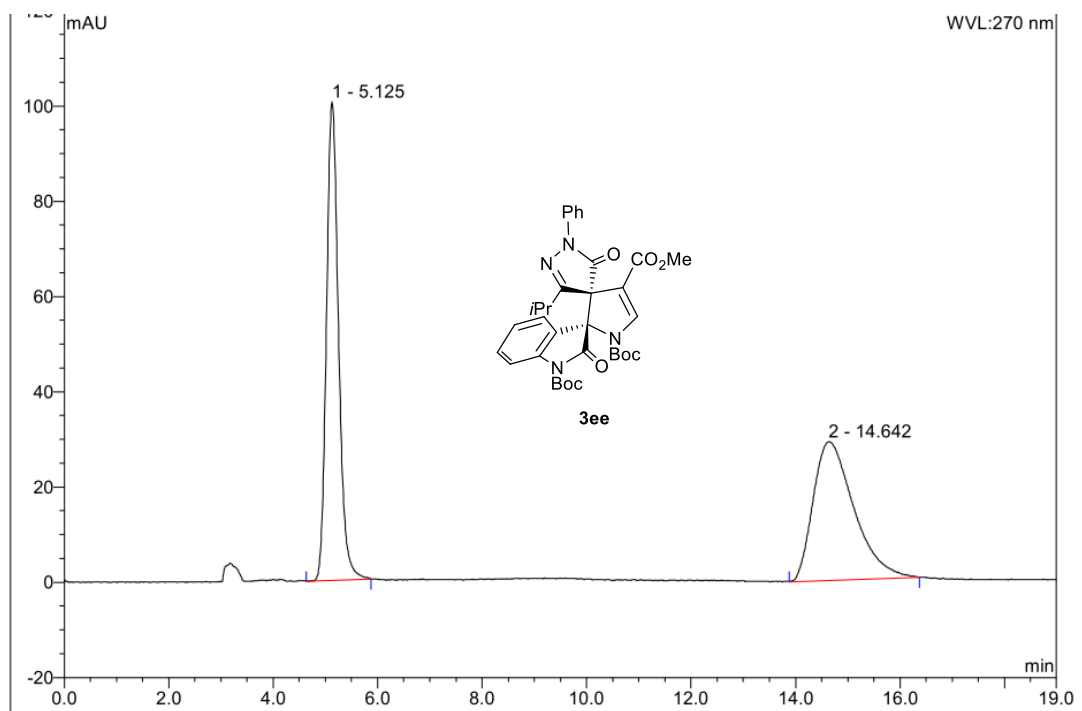

| No.           | Ret.Time min | Peak Name | Height mAU | Area mAU*min | Rel.Area % | Amount | Type |
|---------------|--------------|-----------|------------|--------------|------------|--------|------|
| 1             | 5.13         | n.a.      | 100.505    | 26.946       | 50.61      | n.a.   | BMB  |
| 2             | 14.64        | n.a.      | 29.162     | 26.295       | 49.39      | n.a.   | BMB  |
| <b>Total:</b> |              |           | 129.667    | 53.241       | 100.00     | 0.000  |      |

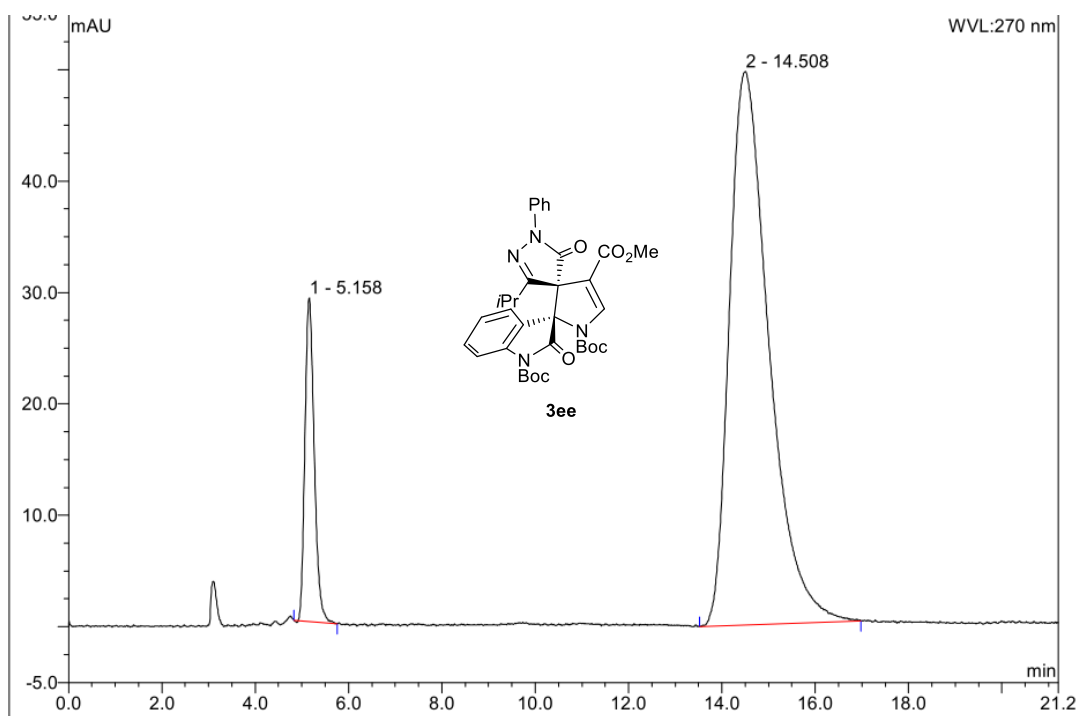

| No.           | Ret.Time min | Peak Name | Height mAU | Area mAU*min | Rel.Area % | Amount | Type |
|---------------|--------------|-----------|------------|--------------|------------|--------|------|
| 1             | 5.16         | n.a.      | 29.018     | 6.677        | 12.05      | n.a.   | BMB* |
| 2             | 14.51        | n.a.      | 49.707     | 48.733       | 87.95      | n.a.   | BMB  |
| <b>Total:</b> |              |           | 78.725     | 55.410       | 100.00     | 0.000  |      |
